# Supplementary material for: Convergence of Genes and Cellular Pathways Dysregulated in Autism Spectrum Disorders
Source: PubMed Central journal article supplement — Am J Hum Genet. 2014 May 1;94(5):677–94. doi: 10.1016/j.ajhg.2014.03.018 (PMC4067558; doi:10.1016/j.ajhg.2014.03.018), 2014-05-01
Supplement: mmc1.pdf [file mmc1.pdf]

The American Journal of Human Genetics, Volume 94

Supplemental Data

## **Convergence of Genes and Cellular Pathways**

### **Dysregulated in Autism Spectrum Disorders**

**Dalila Pinto, Elsa Delaby, Daniele Merico, Mafalda Barbosa, Alison Merikangas, Lambertus Klei, Bhooma Thiruvahindrapuram, Xiao Xu, Robert Ziman, Zhuozhi Wang, Jacob A.S. Vorstman, Ann Thompson, Regina Regan, Marion Pilorge, Giovanna Pellecchia, Alistair T. Pagnamenta, Bárbara Oliveira, Christian R. Marshall, Tiago R. Magalhaes, Jennifer K. Lowe, Jennifer L. Howe, Anthony J. Griswold, John Gilbert, Eftichia Duketis, Beth A. Dombroski, Maretha V. De Jonge, Michael Cuccaro, Emily L. Crawford, Catarina T. Correia, Judith Conroy, Inês C. Conceição, Andreas G. Chiocchetti, Jillian P. Casey, Guiqing Cai, Christelle Cabrol, Nadia Bolshakova, Elena Bacchelli, Richard Anney, Steven Gallinger, Michelle Cotterchio, Graham Casey, Lonnie Zwaigenbaum, Kerstin Wittmeyer, Kirsty Wing, Simon Wallace, Herman van Engeland, Ana Tryfon, Susanne Thomson, Latha Soorya, Bernadette Rogé, Wendy Roberts, Fritz Poustka, Susana Mouga, Nancy Minshew, L. Alison McInnes, Susan G. McGrew, Catherine Lord, Marion Leboyer, Ann S. Le Couteur, Alexander Kolevzon, Patricia Jiménez González, Suma Jacob, Richard Holt, Stephen Guter, Jonathan Green, Andrew Green, Christopher Gillberg, Bridget A. Fernandez, Frederico Duque, Richard Delorme, Geraldine Dawson, Pauline Chaste, Cátia Café, Sean Brennan, Thomas Bourgeron, Patrick F. Bolton, Sven Bölte, Raphael Bernier, Gillian Baird, Anthony J. Bailey, Evdokia Anagnostou, Joana Almeida, Ellen M. Wijsman, Veronica J. Vieland, Astrid M. Vicente, Gerard D. Schellenberg, Margaret Pericak-Vance, Andrew D. Paterson, Jeremy R. Parr, Guiomar Oliveira, John I. Nurnberger, Anthony P. Monaco, Elena Maestrini, Sabine M. Klauck, Hakon Hakonarson, Jonathan L. Haines, Daniel H. Geschwind, Christine M. Freitag, Susan E. Folstein, Sean Ennis, Hilary Coon, Agatino Battaglia, Peter Szatmari, James S. Sutcliffe, Joachim Hallmayer, Michael Gill, Edwin H. Cook, Joseph D. Buxbaum, Bernie Devlin, Louise Gallagher, Catalina Betancur, and Stephen W. Scherer**

# CONTENTS

## SUPPLEMENTAL FIGURES

|                                                                                                                                                   |    |
|---------------------------------------------------------------------------------------------------------------------------------------------------|----|
| Figure S1. CNV burden in genes and loci implicated in ASD and ID in affected and control subjects of all ancestries .....                         | 3  |
| Figure S2. Projection of the glutamergic (A) and cholinergic (B) synapse subclusters enriched in cases over controls, onto the KEGG pathways..... | 4  |
| Figure S3. Candidacy tier for <i>de novo</i> CNV genes selected by NETBAG.....                                                                    | 5  |
| Figure S4. Expression profile for 113 <i>de novo</i> CNV genes selected by NETBAG in the neocortex across 12 developmental stages.....            | 8  |
| Figure S5. Overlap among gene lists pre-DAPPLE analysis.....                                                                                      | 10 |

## HIGHLIGHTED GENES

|                                                                                       |    |
|---------------------------------------------------------------------------------------|----|
| Figure S6. CNV and SNV identified in <i>CHD2</i> in chromosome 15q26.1 .....          | 12 |
| Figure S7. CNV and SNV identified in <i>HDAC4</i> in chromosome 2q37.3 .....          | 14 |
| Figure S8. Recurrent duplications at Xq28 including <i>GDI1</i> .....                 | 16 |
| Figure S9. CNV and SNV identified in <i>SETD5</i> in chromosome 3p25.3 .....          | 18 |
| Figure S10. CNV identified in <i>LSAMP</i> in chromosome 3q13.31 .....                | 21 |
| Figure S11. CNV identified in <i>SH3KBP1</i> in chromosome Xp22.12.....               | 22 |
| Figure S12. CNV and SNV identified in <i>TRIP12</i> in chromosome 2q36.3.....         | 23 |
| Figure S13. CNV and SNV identified in <i>SYNCRIP</i> in chromosome 6q14.3 .....       | 24 |
| Figure S14. CNV identified in <i>DTNA</i> in chromosome 18q12.1 .....                 | 26 |
| Figure S15. CNV overlapping <i>MIR137</i> in chromosome 1p21.3 .....                  | 28 |
| Figure S16. CNV identified in <i>PIK3CB</i> in chromosome 3q22.3 .....                | 30 |
| Figure S17. CNV and SNV identified in <i>HDAC9</i> in chromosome 7p21.1.....          | 32 |
| Figure S18. CNV identified in the distal 16p11.2 region containing <i>SH2B1</i> ..... | 33 |

## SUPPLEMENTAL TABLES

|                                                                                                                  |    |
|------------------------------------------------------------------------------------------------------------------|----|
| Table S1A. Autism strict and spectrum classifications .....                                                      | 35 |
| Table S1B. Quality control – Family and control sample breakdown .....                                           | 36 |
| Table S1C. Quality control – Chromosome abnormalities detected in probands.....                                  | 38 |
| Table S2A. Sample characteristics.....                                                                           | 39 |
| Table S2B. Sample characteristics ( <i>continued</i> ) .....                                                     | 40 |
| Tables S3A-S3C. CNV burden .....                                                                                 | 41 |
| Table S3A. Platform comparison .....                                                                             | 41 |
| Table S3B. Stage 1 (Pinto et al.) versus Stage 2 (new cases) versus Combined (all 2147 European cases) .....     | 42 |
| Table S3C. Characteristics of rare CNVs in 2,147 European ASD probands and 2,640 European controls .....         | 43 |
| Table S4. Rare <i>de novo</i> CNVs in probands confirmed experimentally .....                                    | 44 |
| Table S5A. Parent of origin for rare <i>de novo</i> validated CNVs in probands.....                              | 46 |
| Tables S5B-S5H. Parent of origin of <i>de novo</i> CNVs – breakdown by family type and CNV characteristics ..... | 48 |
| Tables S6A-S6D. List of genes and loci implicated in ASD and ID.....                                             | 50 |
| Table S7A. CNVs overlapping ASD or ID genes and loci in affected and control subjects (all ancestries) .....     | 58 |
| Table S7B. Pathogenic CNVs in affected subjects (all ancestries).....                                            | 61 |
| Table S8. Phenotypes in ASD subjects with pathogenic CNVs or with selected CNVs of uncertain significance .....  | 63 |
| Table S9. Meta-analysis of loci and genes affected by rare CNVs in large ASD cohorts .....                       | 64 |
| Table S10. FMRP targets affected by deletions in probands and not yet implicated in ASD or ID .....              | 65 |
| Tables S11A-S11E. Multigene analyses – various models.....                                                       | 66 |
| Tables S12A-S12D. GO terms, pathways, and MPO enrichment in affecteds versus control subjects.....               | 71 |
| Table S13A. Gene Ontology terms and pathways used to generate a list of neurodevelopmental functions .....       | 71 |
| Table S13B. Effect size for neurobiological-related clusters .....                                               | 72 |
| Table S13C. Neuronal synapse main cluster .....                                                                  | 73 |
| Table S13D. Genes and subjects represented in the enriched cholinergic and glutamergic synapse subclusters ..... | 74 |
| Tables S14A-S14E. Characterization of genes selected by NETBAG.....                                              | 75 |
| Table S15. Functional-group enrichment for DAPPLE results .....                                                  | 75 |
| Table S16. List of 97 high-confidence CNV/SNV genes .....                                                        | 75 |
| Table S17A. Listing of CNV calls in affected subjects .....                                                      | 75 |
| Table S17B. Chromosome abnormalities in parents and control subjects .....                                       | 75 |
| Table S17C. Experimentally validated CNVs .....                                                                  | 75 |

## SUPPLEMENTAL DATAFILES

|                                                                                                               |    |
|---------------------------------------------------------------------------------------------------------------|----|
| Table S8. Phenotypes in ASD subjects with pathogenic CNV or with selected CNV of uncertain significance ..... | 76 |
| Tables S12A-S12D. GO terms, pathways, and MPO enrichment in affecteds versus control subjects .....           | 76 |
| Tables S14A-S14E. Characterization of genes selected by NETBAG.....                                           | 76 |
| Table S15. Functional-group enrichment for DAPPLE results .....                                               | 76 |
| Table S17A. Listing of CNV calls in affected subjects .....                                                   | 76 |
| Table S17B. Chromosome abnormalities in parents and control subjects .....                                    | 76 |
| Table S17C. Experimentally validated CNVs .....                                                               | 76 |

## SUPPLEMENTAL ACKNOWLEDGEMENTS .....

## SUPPLEMENTAL REFERENCES .....

## SUPPLEMENTAL FIGURES

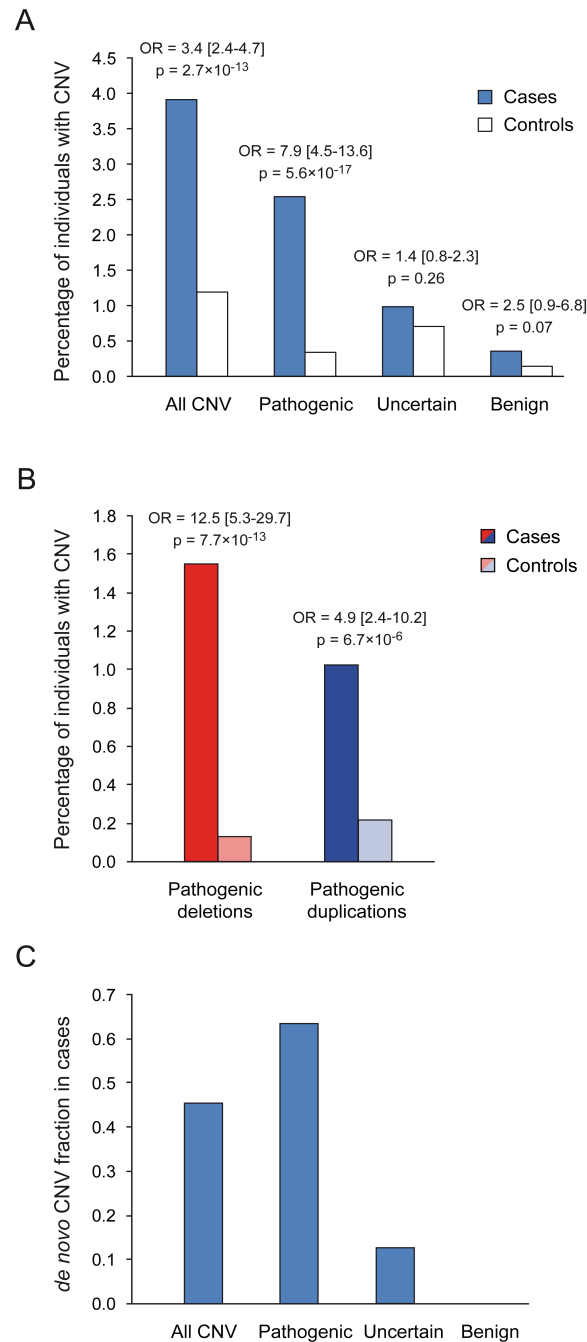

**Figure S1. CNV burden in genes and loci implicated in ASD and ID in affected and control subjects of all ancestries**

CNV data from 2,446 cases and 4,768 controls irrespective of ancestry were analyzed for overlaps with a list of genes and loci causally implicated in ASD/ID (Tables S6A-S6D). Overlap results include 299 non-European cases and 1,843 non-Europeans controls. Only CNVs affecting autosomal dominant and X-linked dominant genes/loci in both genders (132 genes, 56 loci) as well as X-linked recessive genes/loci in males (52 genes, 2 loci) were considered ('all CNV'). Exonic CNVs  $\geq 30$  kb affecting an ASD/ID gene and CNVs overlapping at least 50% of the target loci were selected for further analysis. After curation, CNVs were divided into three categories: pathogenic, uncertain clinical significance or benign. **(A)** Percentage of individuals with CNVs overlapping genes and loci implicated in ASD/ID ('all CNV'), pathogenic, uncertain or benign CNVs and odds ratio (OR) in cases and controls. **(B)** Percentage of individuals with pathogenic deletions or duplications and OR in cases and controls. **(C)** *De novo* CNV fraction in each category in cases.

**Figure S2. Projection of the glutamergic (A) and cholinergic (B) synapse subclusters enriched in cases over controls, onto the KEGG pathways**

**A. Glutamergic pathway**

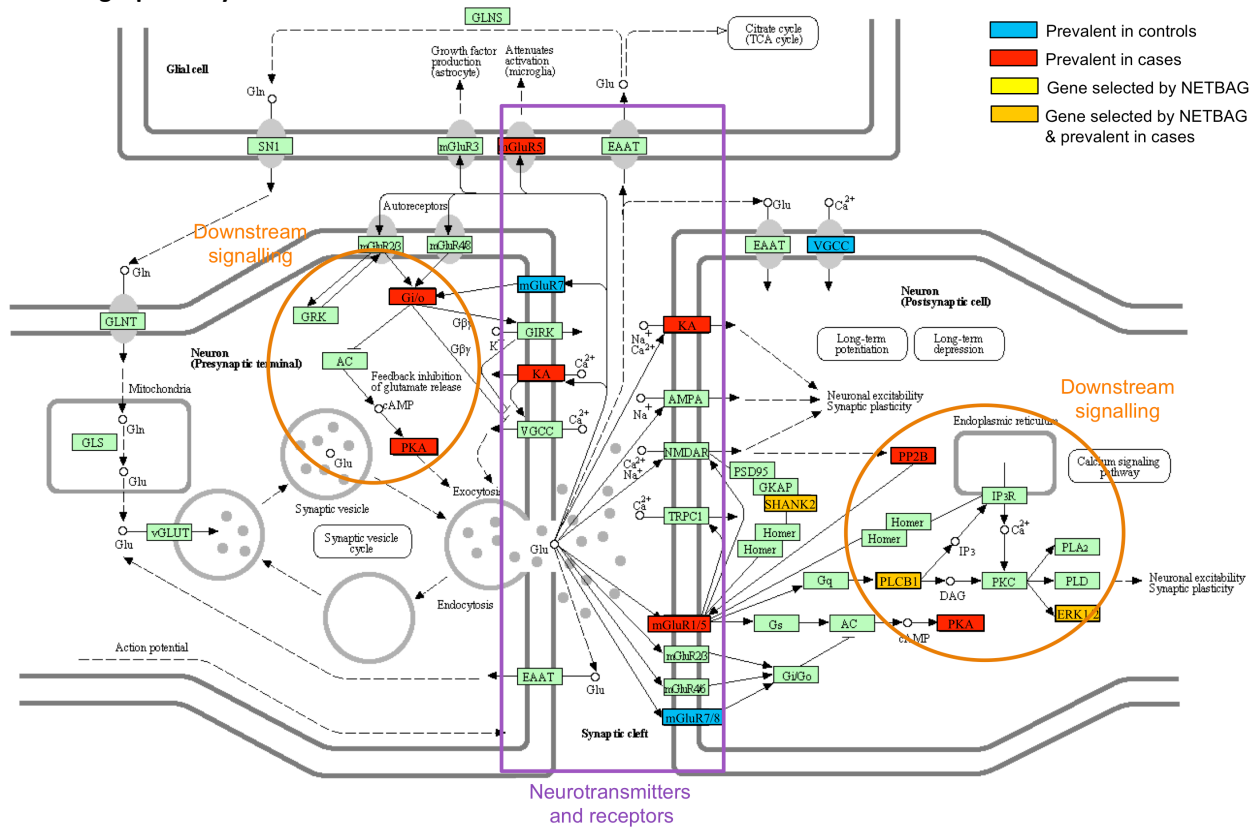

19 cases and 2 controls in the glutamatergic pathway: 11 deleted genes in 19 cases (average size= 635 kb, median size= 265 kb; average number of genes= 16, median number of genes= 3): *GNG13* (1), *MAPK3* (5), *GNG2* (2), *PRKACB* (1), *SHANK2* (3), *PPP3CB* (1), *SHANK3* (3), *GRIK2* (1), *GRM5* (1), *PLCB1* (1), *SHANK1* (1); 2 deleted genes in 2 controls (average/median size= 85 kb; average/median number of genes= 1): *CACNA1C*, *GRM7*. Genes selected by NETBAG (main Figure 4B) are highlighted with yellow or orange shaded boxes.

**B. Cholinergic pathway**

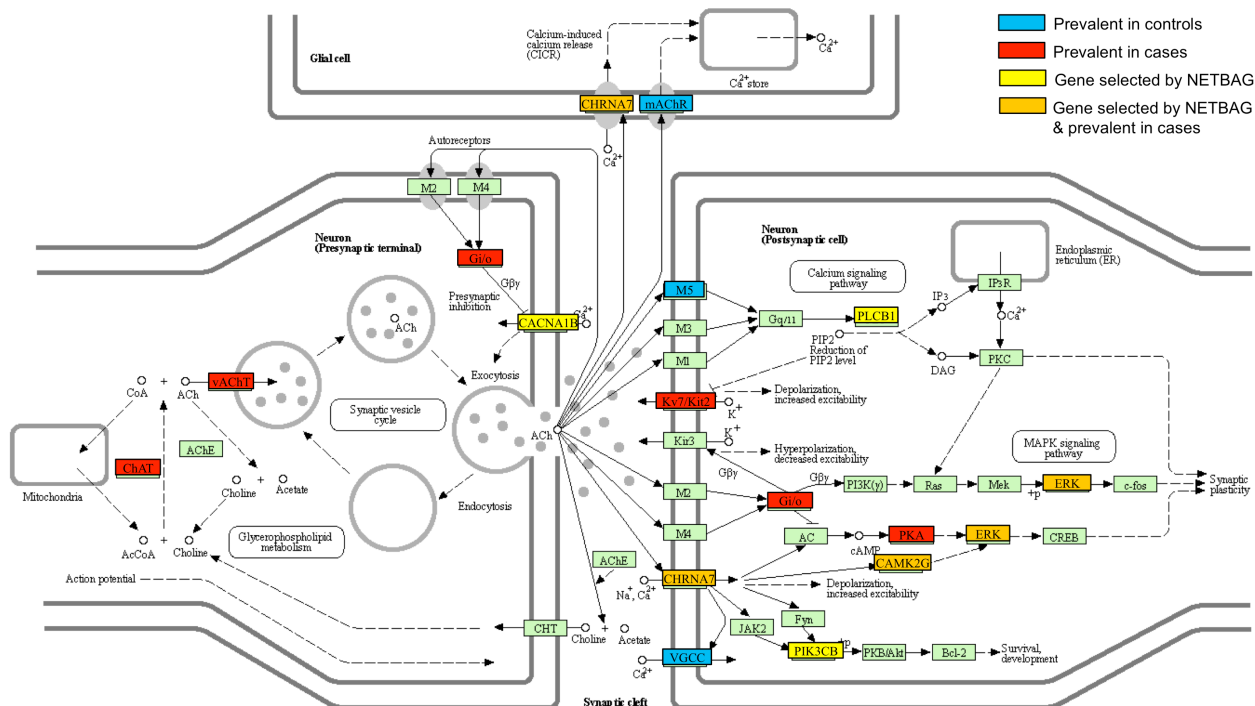

17 cases and 2 controls in the cholinergic pathway. Genes selected by NETBAG (main Figure 4B) are highlighted with yellow or orange shaded boxes

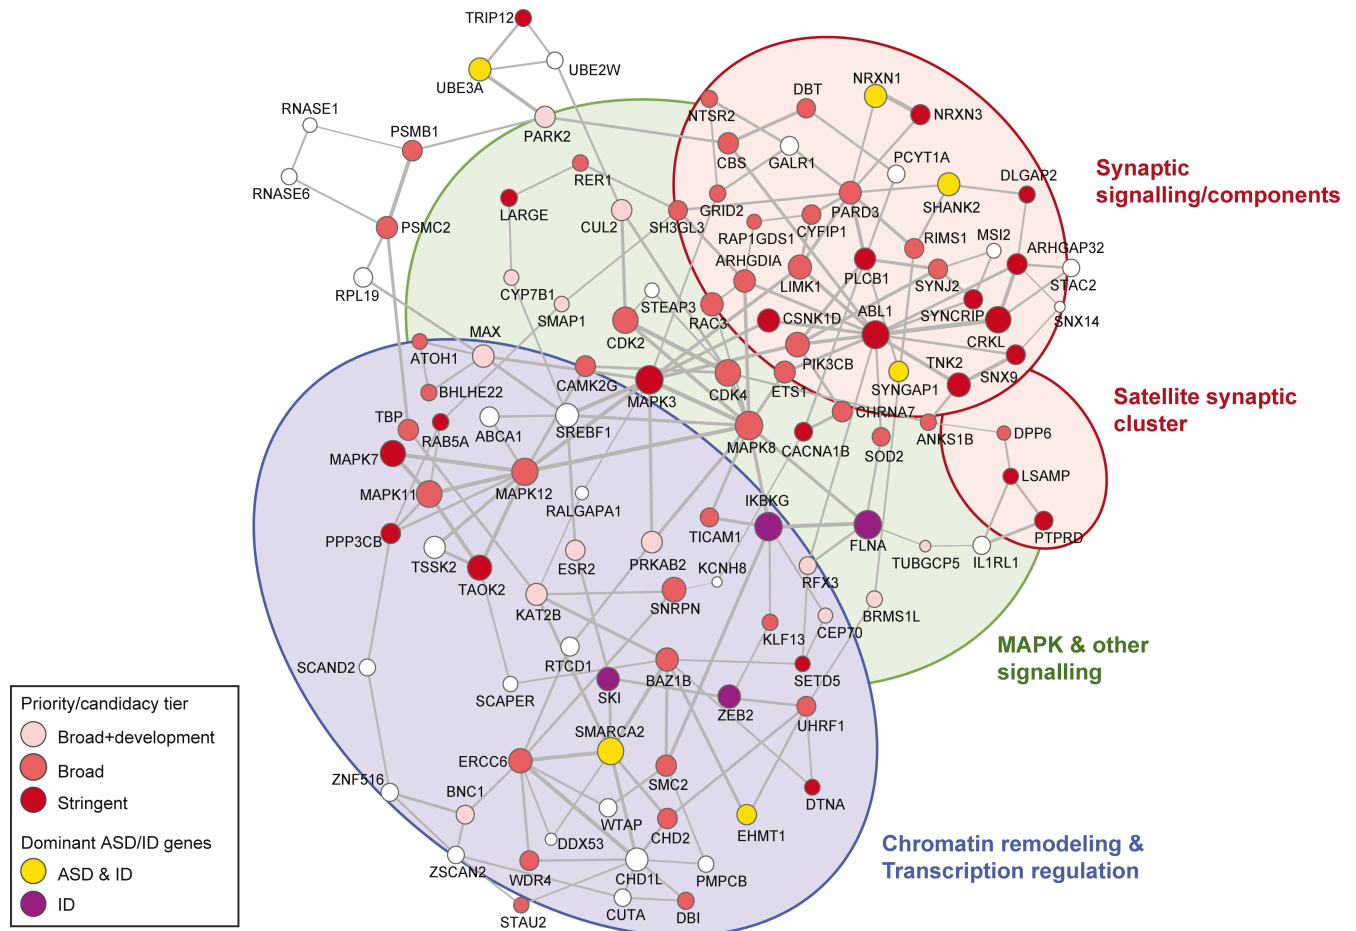

**Figure S3. Candidacy tier for *de novo* CNV genes selected by NETBAG**

Genes implicated in dominant forms of ASD and ID or in ID are highlighted in yellow and purple, respectively. Genes implicated in autosomal recessive ID (*ERCC6*, *CBS*, *DBT*, *PLCB1* and *LARGE*) were not given a specific color for ease of comprehension of the figure. Multiple lines of evidence from the literature and dedicated databases (DECIPHER, ISCA and ECARUCA) for the *CHD2* gene (recently involved in other neurodevelopmental disorders), and the candidate genes *SETD5*, *LSAMP*, *TRIP12*, *SYNCRIP*, *DTNA*, and *PIK3CB*, are given in the section ‘**Highlighted genes**’.

**NETBAG analysis of *de novo* CNV genes:** For this analysis, recurrent events were counted once (or combined in one region) and events that did not intersect any genes were removed; the resulting final set used in the analyses consisted of 75 CNV regions intersecting 874 unique RefSeq genes. Derived gene clusters were scored using the de-weighted method, where the contribution of each individual gene to the overall cluster score is given by the weighted sum of its connections (edges) to the other cluster genes,<sup>1</sup> and significance was obtained by generating random events with the same gene count as observed in the *de novo* CNV dataset with 1,000 randomizations (main **Figure 4B**; **Tables S14A-S14E**). The highest scoring cluster obtained using a searching procedure of up to two genes per CNV (global p-value 0.02) is shown. The list of up to 2 genes selected per CNV is given in **Table S14A**. The majority of the genes identified by NETBAG (92.0%, 104/113) are highly expressed in brain. When using a search procedure of up to one gene per CNV, a list of 69 genes was obtained (global p-value <0.01); this list is given in **Table S14A**. Analysis of established annotation resources, such as PubMed, OMIM, GeneReviews, EntrezGene and iHOP, suggested that a significant fraction of genes in the identified network either play a well-defined functional role in the brain or have been previously implicated in neurological and psychiatric disorders. An overview of functional information about each of the genes forming the cluster can be found in **Table S14B**.

**Prenatal, postnatal or unbiased brain expression of genes selected by NETBAG** (additional information relevant to main **Figure 4B**, based on NETBAG data). Nodes were colored according to whether a gene’s brain expression is prenatally or postnatally biased, or has no biased expression in an analysis of 12 developmental stages of the BrainSpan RNA-seq dataset. Genes were considered biased if their mean expression in prenatal developmental stages was increased more than two-fold compared to their post-natal expression, or vice versa. Genes with related function according to Gene Ontology (GO)<sup>2</sup> and KEGG pathways<sup>3</sup> were indicated by shaded areas; a complete listing of over-represented GO terms and pathways is given in **Table S14D**. By further examining these genes (**Table S14C**), we found that 77% (87/113) of them have a strong link with neuronal and brain-specific genes. We explored whether affected genes were biased to certain developmental stages by interrogating the temporal expression of genes selected by NETBAG. We found no overall significant

bias to prenatally expressed genes, but we did observe prenatal bias for a cluster of genes participating in chromatin remodeling and transcription regulation (main **Figure 5B**, **Table S14E**). The prenatally-biased expression profile was characterized by high expression during development and sharp decrease after birth. We further compared expression levels (**Table S14B**) and found that most of the genes are highly expressed in the neocortex. Similar results were obtained when looking at LoF *de novo* single SNVs in 122 genes assembled from four ASD exome-sequencing studies.<sup>4-7</sup>

### Candidacy tier of ASD candidate genes

To identify potential new ASD targets and gain mechanistic insights, we expanded our analysis to several gene lists described below. These gene lists were used to build a candidacy tier, by identifying which genes are more likely to be implicated in ASD based on membership in the gene lists. These gene lists were used for the analyses presented in main **Figure 3**, **Figure S3** and **Table S14C**. Our analyses focused on exonic events overlapping or disrupting exons, and deletions and duplications were analysed separately. P-values associated with odds ratios were calculated using Fisher exact tests.

- 1) **Fragile X mental retardation protein (FMRP) targets:** the gene encoding FMRP, *FMR1*, responsible for fragile X syndrome, is mutated in ~2% of ASD cases.<sup>8</sup> Significant overlap between FMRP-targets and ASD candidate genes was reported recently,<sup>9</sup> and Iossifov et al.<sup>4</sup> had previously shown that rare *de novo* LoF SNVs identified in their exome sequencing study were enriched in this class of genes. We used a set of FMRP-RNA interactors identified experimentally (n=842), using crosslinking and immunoprecipitation (CLIP) experiments in mouse.<sup>9</sup> We note that a later paper<sup>10</sup> detected FMRP targets computationally, using human RNA sequence motif analysis (n=939 top genes as provided by the authors), but given the limited overlap between the genes in the two papers (~20%), we decided to use for our enrichment analyses only the list of targets that were experimentally identified by Darnell et al.<sup>9</sup>.
- 2) **Post-synaptic density genes:** The full list of experimentally identified human post-synaptic density genes was collected from Bayes et al. (n=1,453).<sup>11</sup>
- 3) **Haploinsufficiency index:** We used the predicted haploinsufficiency index (HI) by Huang et al.<sup>12</sup> In particular, we used the imputed predictions as these have better gene coverage, and showed a similar performance compared to the original list of predicted genes pre-imputation when looking at dominant and recessive ASD and ID genes (data not shown). We defined four gene-sets: all genes with any value of HI (17,081 genes), the top 55% HI genes (pHI  $\geq 0.15$ , 8,862 genes), top 26% (pHI  $\geq 0.35$ , 4,136 genes), and top 14% (pHI  $\geq 0.55$ , 2,214 genes). We focused our analysis on deletions because deletions, not duplications, are associated with HI, and show that HI is an important contributor to ASD etiology (duplication breakpoints can also disrupt genes or their regulatory elements and lead to haploinsufficiency).
- 4) **Neurodevelopmental/neuropsychiatric phenotypes:** Genes associated with neurodevelopmental/neuropsychiatric phenotypes were mined from HPO (Human Phenotype Ontology)<sup>13</sup> for human and MGI/MPO for mouse (Mouse Genome Informatics/Mammalian Phenotype Ontology, The Jackson Laboratory, Bar Harbor, Maine, <http://www.informatics.jax.org>; data retrieved on November, 2012).<sup>14</sup>
  - a) For human, we selected all genes annotated for “Behavioural/Psychiatric abnormality” (HP:0000708) and/or “Cognitive impairment” (HP:0100543), as well as children terms in the ontology. We only considered genes with HPO phenotype annotation derived from OMIM, as for these we could more reliably infer the mode of inheritance based on the first digit of the OMIM ID (1 = autosomal dominant, 2 = autosomal recessive, 3 = X-linked).
  - b) For mouse, we selected all genes annotated for “nervous system phenotype” (MP:0003631) and “behavior/neurological phenotype” (MP:0005386), as well as children terms in the ontology; eQTL and complex phenotypes were removed. Autosomal dominant mode of inheritance was inferred by parsing MGI mutation allele tables and retaining only gene-phenotype annotations supported by a heterozygous mutated allele; genes on the human X chromosome were removed to obtain the autosomal dominant subset.
- 5) **Neurodevelopmental function:** Two neurodevelopmental lists were generated to help evaluate the candidacy of the genes selected by NETBAG: “NeuroF” was purely based on the manual curation of Gene Ontology terms and pathways, and “NeuroF\_EM” was based on gene-sets found associated by the logistic regression test in the enrichment map (EM) (results shown in main **Figure 4A**) and clustered as: (a) Cell projection/Neural development/Axonogenesis, or (b) Neuronal synapse. The Gene Ontology terms and pathways used to generate NeuroF are listed in **Table S13A**.
- 6) **Developmental genes:** Genes were collected from all gene-sets found associated by the logistic regression test and clustered as Development/Cell Proliferation/Cell Motility in the enrichment map (“Dev\_EM”).
- 7) **Brain-expressed genes:** Three gene lists were constructed based on the human BrainSpan RNA-seq dataset:
  - a) *ExprBspan\_BrainAny\_log2rpkm3.0*: genes with RPKM  $\geq 3.0$  in at least five BrainSpan data-points (a data-point corresponds to any unique combination of donor subject x brain region x developmental time-point).
  - b) *ExprBspan\_BrainAny\_log2rpkm4.5*: genes with RPKM  $\geq 4.5$  in at least five BrainSpan data-points.
  - c) *ExprBspan\_NotBrainExprF*: genes RPKM  $\geq 1.0$  not satisfying the above definition, yet annotated for at least one Gene Ontology term or pathway; these are similar in number to *ExprBspan\_BrainAny\_log2rpkm4.5* and therefore were used as a negative control list, representing functionally characterized genes not expressed or expressed at very low levels in brain.Brain-expressed gene lists were also defined based on the Novartis expression atlas (HG-U133A Affymetrix arrays), and used only for the definition of candidate gene lists:

- a) *Novartis Brain-expressed genes*: for a gene to be considered brain expressed it needed to have the robust multi-array average (RMA) gene expression values in whole-brain or fetal brain: (i) greater than the array median expression value (considering all tissues), and (ii) greater than the median expression in non-nervous tissues.
- b) *Novartis Brain-specific genes*: for a gene to be considered brain-specific it needed to have the RMA gene expression values in whole brain or fetal brain: (i) greater than the array median expression value (considering all tissues), and (ii) greater than the double of the median expression in non-nervous tissues.

Three lists were compiled based on the results from the 1-gene hit odds ratio analysis of single gene-sets and their combinations (main **Figures 3A-B**):

- 1) Stringent (1,088 genes): clearly linked to synaptic components and/or autosomal dominant neurodevelopmental/neuropsychiatric phenotypes.
- 2) Broad (5,342 genes): linked to synaptic components, or neurodevelopmental/neuropsychiatric phenotypes, or brain expression.
- 3) Broad development (7,158 genes): extended by gene-sets corresponding to broader developmental functions found by the logistic regression gene-set test and enrichment map clusters.

In particular, the following definitions were used:

- 1) Stringent, union of:
  - a) FMRP targets from Darnell et al.<sup>9</sup>
  - b) Genes found in at least two of these lists:
    - i) NeuroPheno Dom
    - ii) Intersection of: (a) Novartis Brain-expressed and (b)  $HI \geq 0.55$
    - iii) Postsynaptic density genes, full dataset from Bayes et al.<sup>11</sup>
    - iv) FMRP targets from Ascano et al.<sup>10</sup>
- 2) Broad, union of:
  - a) Stringent candidates (as defined above, in Stringent)
  - b) Novartis Brain-specific
  - c) Intersection of: (i) `ExprBspan_BrainAny_log2rpkm4.5` and (ii)  $HI \geq 0.35$
  - d) Intersection of: (i) `NeuroF` and (ii)  $HI \geq 0.35$
  - e) Intersection of: (i) `ExprBspan_BrainAny_log2rpkm3.0` and (ii) `NeuroPheno All`
- 3) Broad development, union of:
  - a) Broad candidates (as defined above, in Broad)
  - b) Intersection of: (i) `NeuroF_EM` and (ii) `NeuroPheno All`
  - c) Development cluster in the enrichment map (**Figure 4A**, main text)

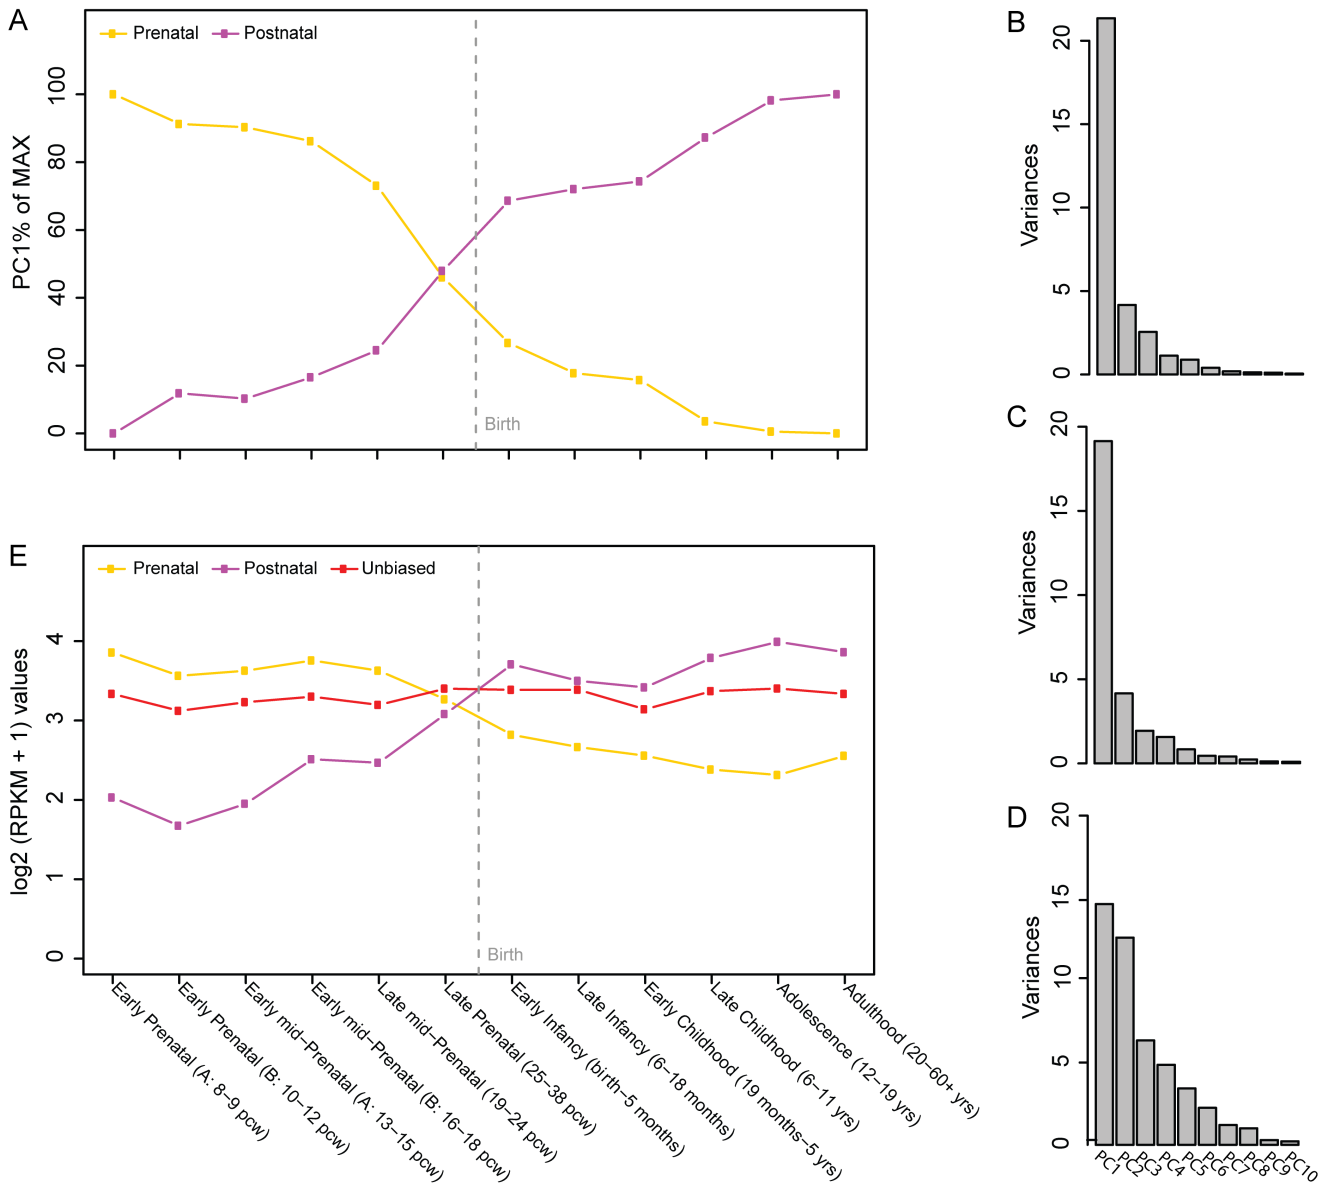

**Figure S4. Expression profile for 113 *de novo* CNV genes selected by NETBAG in the neocortex across 12 developmental stages**

The time course of BrainSpan RNA-seq gene expression data was quantile normalized and log2 transformed. **(A)** The first principle components (PC1, as percentage of the maximum, %/MAX) for the 113 CNV genes are shown in 2 expression groups (prenatally biased, postnatally biased). The amount of variance explained by each principle component is shown for **(B)** Prenatally-biased genes, **(C)** Postnatally-biased genes, and **(D)** Unbiased genes. **(E)** The group centroids (median) of the 3 expression groups (Prenatally biased, Postnatally biased, Unbiased) are plotted at each developmental stage with the Y axis showing log2 transformed expression profiles log2(RPKM + 1). PCW, post-conceptual weeks. Panels B-D compared the variance explained by PC1 for the 3 expression groups. PC1 for Unbiased genes is not representative, i.e., it does not explain more variance than other PCs and it is unable to profile the major direction of the expression group. Therefore we did not include the unbiased group in panel A.

**RNA-Seq data preprocessing and normalization:** The human brain developmental transcriptome data, consisting of a total of 12 developmental stages (from 8-9 post-conceptual weeks [PCW] to 20-60 years) in 524 samples, was downloaded from BrainSpan resource (<http://brainspan.org/>; Allen Institute for Brain Science, 2012; analyses presented here used the October 2013 version).<sup>15,16</sup> In this dataset, gene expression profiles measured by RNA-sequencing experiments were represented as reads per kilobase of transcript per million mapped reads (RPKM),<sup>17</sup> which were pre-summarized to gene levels based on a composite model defining a gene as the union of all exonic nucleotides across all transcripts. A sample level filtering procedure was implemented after comparison of the distribution of each sample to the entire distribution (all 524 samples); the top 2% outliers were removed based on the sum of chi-squares with visual assistance on boxplot. Subsequently, a gene level filter was applied so that only genes with a RPKM value > 0 in



more than 80% of the samples in any brain region of any developmental stage were kept. To ensure quality of the data, the samples were further filtered by RNA integrity number (RIN) > 8. As a result, 42,965 gene entries and 416 samples passed QC and entered the downstream analysis where quantile normalization and log<sub>2</sub> transformation procedures were performed.

**Gene expression level classification:** We then sought to classify genes by their expression levels across multiple brain regions and developmental stages. The genes with lower 20% expression level in all 8 brain regions (neocortex, amygdala, hippocampus, striatum, diencephalon, upper rhombic lip, cerebellar cortex, and dorsolateral prefrontal cortex) were classified as “non-expressed” genes. The remaining 80% genes were classified into 3 expressional categories specifically for two brain regions, the neocortex (NCX) and dorsolateral prefrontal cortex (DFC): 1) lowly expressed (bottom 25% averaging across NCX or DFC samples); 2) highly expressed (top 25% averaging across NCX or DFC samples); and 3) the remainder of genes were considered moderately expressed for NCX or DFC regions.

**Identification of differentially expressed genes:** We analysed the 113 genes resulting from the NETBAG functional network analysis of 102 *de novo* CNVs, and determined their prenatal-biased or postnatal-biased status by a nonparametric algorithm, similar to the method used in Xu et al.<sup>18</sup> Specifically, for each of the 8 brain regions, we used the median of samples to represent the expression level of a certain given gene under a specific developmental stage. Subsequently, two groups were defined: prenatal (periods 2A, 2B, 3A, 3B, 4, 5) and postnatal (periods 6 through 11). Wilcoxon rank sum test with a p value cut-off of 0.05 and group median fold change cut-off of 1 were applied to determine differentially expressed genes between prenatal and postnatal groups. Genes with significantly higher expression in prenatal or postnatal group were considered prenatally or postnatally biased genes, while the remaining genes were classified as unbiased. Interestingly, we observed that some genes (e.g. *KCNH8*, *CRKL*) presented a peculiar profile: a “U shape”, i.e., high expression in the first developmental stages followed by a decrease in expression and later, towards the last developmental stages, a new increase in expression. If there was a predominance of high expression in the left or in the right branch of the “U” curve, the genes were classified as prenatally-biased or postnatally-biased, respectively. The inverse could be observed for genes with a profile resembling an inverted U (e.g. *RAC3*).

**Profile of gene expression across 12 developmental stages:** Expression profile across 12 developmental stages of the 113 genes resulting from the NETBAG functional network categorized into 3 groups (prenatal, postnatal and unbiased) was plotted for 8 brain regions after Principle Component Analysis was performed with a custom R script. The first principle component of each expressional group was plotted in **Figure S4** for the neocortex region. Of note, the chromatin/transcription module in **Figures 4B** and **S4** showed a predominance of genes with a prenatally-biased expression profile, suggesting that besides the function of the altered gene, the timing of the effect of the genetic perturbation may also be of critical importance in determining disease risk.

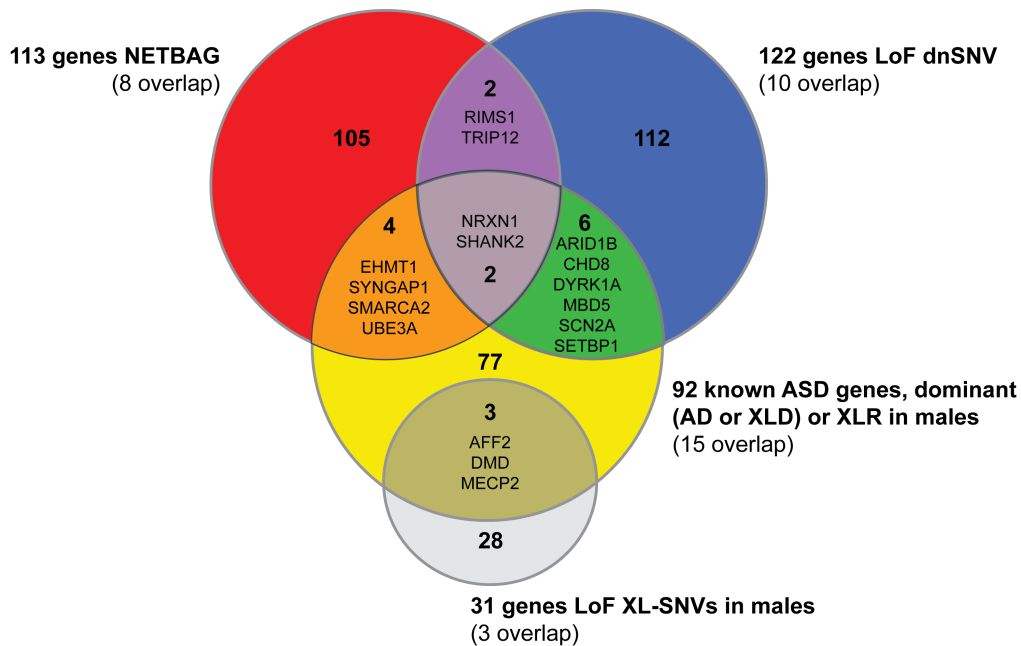

**Figure S5. Overlap among gene lists pre-DAPPLE analysis**

For the protein-protein interaction (PPI) network analyses presented in **Figures 5A and S5**, we used the Disease Association Protein-Protein Link Evaluator (DAPPLE)<sup>19</sup> under the assumption that causal genetic variants affect a limited number of mechanisms that are detectable by PPIs. DAPPLE takes a list of genes or loci as input and searches for significant physical connectivity among proteins encoded by those genes based on protein-protein interactions available in the InWeb database.<sup>20</sup> DAPPLE will then assess the statistical significance of several network connectivity parameters as well as of the connectivity of individual proteins to other seed proteins using a within-degree node-label permutation method. The Venn diagram shows the overlap between four lists used as input in DAPPLE (i.e. pre-DAPPLE):

- 1) 113 genes affected by *de novo* CNVs in AGP probands selected by NETBAG.
- 2) 122 genes with *de novo* LoF SNVs from four published whole exome sequencing studies comprising 965 ASD cases.<sup>4-7</sup> LoF variants included nonsense, frameshift, and splice site-disrupting mutations. One of the 122 genes is X-linked (*RPS6KA3*), and the remainder are autosomal. Three genes were not present in the InWeb database and were thus not included in the analyses (*DHRS4L1*, *PCDHA13*, and *RAD21L1*).
- 3) 92 genes known to be involved in ASD (list updated from Betancur, 2011)<sup>21</sup> (**Table S6A**); only autosomal dominant (AD) or X-linked (XL) genes were included (XL dominant, XLD, and XL recessive, XLR), since heterozygous CNVs affecting genes involved in autosomal recessive disorders are not deleterious *per se*.
- 4) 31 X-linked genes with hemizygous LoF SNVs in male ASD cases and not observed in male controls.<sup>22</sup>

Of the 336 genes analysed (339 unique genes pre-DAPPLE minus 3 not present in the Inweb database), 17 genes overlap between two or more lists. Specifically, the *de novo* CNV genes selected by NETBAG overlap with the list of genes with *de novo* LoF SNVs and with the list of genes known to be involved in ASD; two of the genes (*NRXN1*, *SHANK2*) were shared by the three groups. There is no overlap between the 113 genes selected by NETBAG and the X-linked genes with LoF SNVs. Likewise, the Venn diagram post-DAPPLE depicted in main **Figure 5A** shows the overlap among the 151 genes selected by DAPPLE. It resembles the pre-DAPPLE Venn diagram since the relationship between the four gene lists was maintained, including the sharing of two genes (*NRXN1*, *SHANK2*) by the three main lists of genes. Over-representation analysis identified convergent functional themes related to neuronal development and axon guidance, signalling pathways, and chromatin/transcription regulation. Moreover, 90.7% (137/151) of the gene products reside within the same interconnected cluster.

We then further analysed the 113 genes selected by NETBAG and the DAPPLE output network of 151 proteins in terms of brain expression during development and in terms of functional groups (**Table S14E** and **S15**, respectively). Regarding the 113 gene list, we observed that the functional group composed of chromatin remodelers and transcription factors is significantly enriched for prenatal-biased genes and that the functional group composed of signalling genes is enriched for postnatal-biased genes. Similarly, for the DAPPLE output network, the chromatin remodelers/transcription factors functional group is significantly enriched for prenatal-biased genes, with a smaller p-value than the one estimated for the same functional group on the 113 genes list. Interestingly, in this case the functional group composed of neuronal genes is significantly enriched for postnatal-biased genes.

**PhyloP and GERP scores:** Basewise conservation scores (PhyloP) across 45 vertebrate genomes (including the human genome) were downloaded from the UCSC website (<http://genome.ucsc.edu/>)<sup>23</sup> and processed with reference to the UCSC gene track (known genes). Using only the exome, the average base score was calculated. When different variants were present in a gene, all isoforms were aggregated and the average score was used. Likewise, the Genomic Evolutionary Rate Profiling (GERP++) score was downloaded from

Sidow's Lab website (<http://mendel.stanford.edu/SidowLab/downloads/gerp/index.html>). GERP score was calculated by taking the average basewise score of a gene. Both PhyloP and GERP++ scores of genes were ranked. The ranking percentage of the scores (e.g. X% meaning X% of genes in the entire genome are ranked behind the given gene in terms of GERP or PhyloP scores) are calculated to characterize each of the genes. Genes in the DAPPLE network (main **Figure 5B**) are among the top 75% more conserved genes compared to the genome average (based on GERP scores and PhyloP), and are typically long (median 103 kb vs. 10 kb for the genes in whole genome). Functionally significant and highly conserved genes tend to be more central in physical protein-protein and regulatory networks.<sup>24</sup>

## HIGHLIGHTED GENES

### Genes involved recently in other disorders

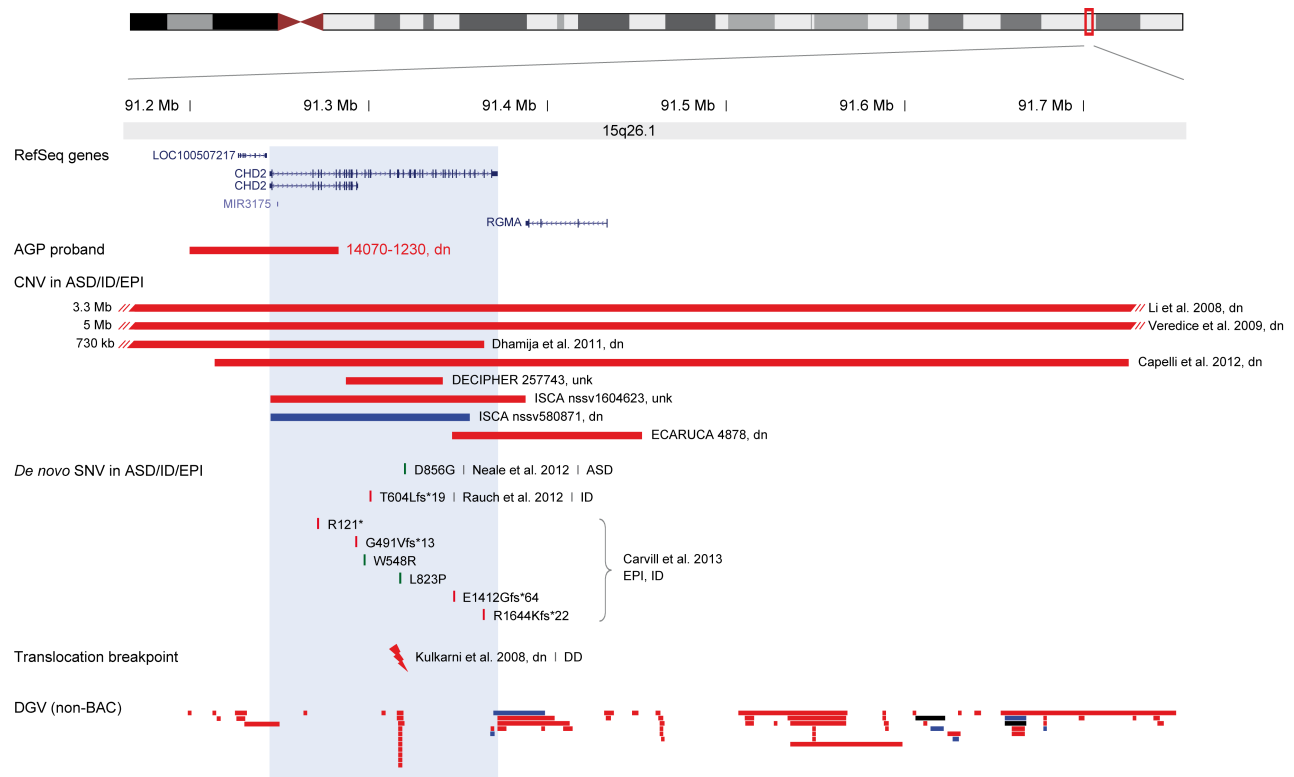

**Figure S6. CNV and SNV identified in *CHD2* (chromodomain helicase DNA binding protein 2) in chromosome 15q26.1**

Chr15:91,165,000-91,750,000 (hg18). Abbreviations: ASD, autism spectrum disorder; dn, *de novo*; DD, developmental delay; EPI, epilepsy; ID, intellectual disability; unk, unknown inheritance.

#### 1) AGP

- Proband 14070-1230, male, *CHD2* exonic deletion (chr15:91200007-91283004), *de novo*. The deletion also involves *LOC100507217* and *MIR3175*. The affected younger brother also carries the deletion, absent from both parents. SNP genotyping indicated that the deletion occurred in the paternal chromosome, suggesting paternal germline mosaicism. Phenotype: index case, 14 yo, autism (meets criteria both on ADI-R and ADOS), walked at 14 mo, first words 24 mo, phrases 26 mo, currently verbal, ID (Griffiths: language DQ 68, performance DQ 46, global DQ 53); normal growth, normal neurological exam; minor dysmorphic features: micrognathia, protruding ears; no epilepsy; brain MRI: altered angular gyrus (normal variant, unknown pathological significance). Brother, 12 yo, mild autism on ADOS, walked at 15 mo, first words 24 mo, phrases 36 mo, verbal, ID (Griffiths: language DQ 65, performance DQ 61, global DQ 51); normal growth, normal neurological exam; minor dysmorphic features similar to his brother (micrognathia, protruding ears); epilepsy, onset 9 y, partial with secondary generalization, difficult to control with carbamazepine; EEG showed paroxistic activity in the left temporal lobe.
- No *CHD2* deletions among 4,768 controls and 4,875 parents.

#### 2) Other human genetic evidence

##### CNV:

- Li et al.<sup>25</sup>: Male with t(15;22)(q26.1;q11.2) translocation and a 3.3 Mb deletion encompassing *CHD2* (chr15:89197342-92489641) at the 15q breakpoint, *de novo*. Phenotype: developmental delay, walked at 20 mo, language delay, developmental motor coordination disorder, height and head circumference consistently  $\leq 3^{\text{rd}}$  centile, weight  $\leq 5^{\text{th}}$  centile, delayed bone age (6-mo-old bone age at 18 mo of chronological age, and 18-mo-old bone age at 36 mo chronological age), mild dysmorphic features (anteverted nares, unilateral auricular pit, fetal fingertip pads, low posterior hairline, and back hirsutism), left eye amblyopia corrected surgically at age 2. He had two episodes of febrile seizures. *IGF1R* was translocated to chromosome 22 and showed 50%

reduction of expression, which could be responsible for the growth deficiency. Angelman syndrome was ruled out by methylation analysis.

- Veredice et al.<sup>26</sup>: Female, 5 Mb deletion encompassing *CHD2* (chr15:87796000-92700000), *de novo*. Phenotype: severe intractable myoclonic epilepsy with photosensitivity, with onset at 6 mo, ID, growth delay, peculiar facial features and minor physical anomalies. Born at 37 weeks, weight 3<sup>rd</sup> centile, length 10<sup>th</sup> centile, head circumference 2<sup>nd</sup> centile. At 21 mo her weight was 3<sup>rd</sup> centile, with length and head circumference <<3<sup>rd</sup> centile. She had congenital hypothyroidism, bicuspid aortic valve, diffuse hypotonia, ligamentous laxity, and dysmorphic features (upward slanting eyes, epicanthal fold, depressed nasal bridge, full cheeks, prominent lips, downturned corners of the mouth, protruding tongue, large ears with anteverted lobe, single palmar crease, increased 1<sup>st</sup>-2<sup>nd</sup> interdigital space and redundant nuchal skin). Her language was limited to a few words and she had mild developmental delay (Griffith's developmental quotient 67). Brain MRI showed cerebellar vermis hypoplasia with mega-cisterna magna.
- Dhamija et al.<sup>27</sup>: Female, deletion encompassing *CHD2*, with a minimum size of 731 kb (chr15:90633409-91364628) and a maximum size of 936 kb (chr15:90530351-91466733), *de novo*. Phenotype: 9 yo girl with developmental delay, ASD, growth delay, and intractable generalized epilepsy, with onset at 3.5 y. Initially the seizures were partial complex but later became generalized; most prominent were absence seizures, occurring many times a day. She had delayed motor development (walked at 24 mo) and delayed language development with echolalia and mild generalized cognitive delay upon formal testing. On examination, she had mild dysmorphic features (widely set eyes, bilateral pits on the helix of the ears, and crowded teeth with prominent incisors), short stature and head circumference <3<sup>rd</sup> centile. Brain MRI was normal.
- Capelli et al.<sup>28</sup>: Female, 511 kb deletion encompassing 4 genes, *CHD2*, *LOC100507217*, *MIR3175* and *RGMA* (chr15:91213864-91724860), *de novo*. *RGMA* (repulsive guidance molecule, member A) exerts a negative control on axon growth and could also potentially contribute to the phenotype. Phenotype: when examined at the age of 6 y, she presented global developmental delay, epilepsy, autistic behavior, severe speech impairment with minimal use of words, short attention span, facial dysmorphisms (prognathia, wide mouth, short and widely spaced teeth, strabismus), gait ataxia with uplifted arms and hand flapping, slight hypotonia and hyperactive deep tendon reflexes. Weight, height and head circumference were at the 50<sup>th</sup>, 75<sup>th</sup> and 10<sup>th</sup> centiles respectively. Angelman syndrome was suspected but the methylation pattern at *SNRPN* was normal. Seizures started at the age of 24 mo and were partially controlled with valproic acid. (Corresponds to subject 249888 in DECIPHER.)
- DECIPHER<sup>29</sup>: Subject 257743, male, *CHD2* intragenic deletion (chr15:91287269-91341234), inheritance unknown. Phenotype: autism, macrocephaly, proportionate short stature, scoliosis. This individual also has a 16p11.2 deletion syndrome, inheritance unknown.
- ISCA<sup>30</sup>: Subject nssv1604623, unknown gender, deletion encompassing 3 genes, *CHD2*, *MIR3175* and *RGMA* (chr15:91245098-91387818), inheritance unknown. Phenotype: seizures.
- ISCA: Subject nssv580871, unknown gender, intragenic *CHD2* duplication (chr15:91245028-91356680), *de novo*. Phenotype: developmental delay and additional significant developmental and morphological phenotypes referred for genetic testing.
- ECARUCA<sup>31</sup>: Subject 4878, male, deletion encompassing only 2 genes, *CHD2* and *RGMA* (chr15:91346585-91452586), *de novo*. Phenotype: ID, truncal obesity, large ear lobules, bulbous nasal tip, low posterior/trident hairline, cryptorchid testes, small hands and feet, tapering fingers, hypotonia, seizures, abnormal EEG.

#### Translocation breakpoint:

- Kulkarni et al.<sup>32</sup>: Female proband with a balanced *de novo* translocation t(X;15)(p22.2;q26.1); the 15q26.1 breakpoint disrupts *CHD2*, whereas the Xp22.2 breakpoint lies in a gene-free region. Phenotype: developmental delay, learning problems, scoliosis, hirsutism, high arched palate, normal face (including eyes and ears), syndactyly of the toes, height <30<sup>th</sup> centile and head circumference <25<sup>th</sup> centile. No seizures reported at age 17 y.

#### SNV:

- Carvill et al.<sup>33</sup> (targeted sequencing in epileptic encephalopathies): 6 individuals (4 males and 2 females) with *de novo* mutations in *CHD2* (3 frameshift, 1 stop, 2 missense). Phenotype: 2 had myoclonic atonic epilepsy, 3 had epileptic encephalopathy not otherwise specified and 1 had Lennox-Gastaut syndrome. Seizure onset occurred between 1-3 y; myoclonic seizures were present in all six, photosensitivity in three. All had ID (2 moderate, 4 severe), 1 had ASD.
- Neale et al.<sup>5</sup> (exome sequencing in ASD): Subject 10C100480, male, *CHD2* missense variant, *de novo*. The variant is predicted to be either benign by PolyPhen2<sup>34</sup> and PANTHER,<sup>35</sup> or damaging by SIFT,<sup>36</sup> SNAP,<sup>37</sup> and Mutation Taster,<sup>38</sup> the affected residue is highly conserved: GERP 5.48,<sup>39</sup> ConSurf 6/9.<sup>40</sup> Phenotype: ASD (no other information provided).
- Rauch et al.<sup>41</sup> (exome sequencing in nonsyndromic sporadic ID): Subject MS134, female, *CHD2* frameshift mutation, *de novo*. Phenotype: severe nonsyndromic sporadic ID (IQ 50-69), absence seizures (onset at 5 y), Duane anomaly, no ASD.

### 3) Functional evidence

- *CHD2* encodes a member of the chromodomain helicase DNA-binding (CHD) family of proteins, characterized by the presence of chromodomains (chromatin organization modifier) and SNF2-related helicase/ATPase domains. CHD proteins alter gene expression by modification of chromatin structure, playing critical roles during development.

- Expressed in the brain.
- *Chd2* knockout in mice results in embryonic lethality; heterozygous mice have variable postnatal lethality and growth retardation, with reduced body fat, pronounced lordokyphosis, renal disease and anemia in adults.<sup>42,43</sup>

#### 4) Other evidence

- % haploinsufficiency (HI) = 15.8 (likely to be haploinsufficient).<sup>12</sup>
- Mutations in *CHD7* cause CHARGE (coloboma, heart defects, atresia of the choanae, retardation of growth and developmental, genital and/or urinary defects and ear abnormalities) syndrome, associated with syndromic ID and sometimes ASD.<sup>44,45</sup>
- Nine *de novo* SNV in *CHD8* reported in subjects with ASD (3 nonsense, 4 frameshift, 1 splice, and 1 single amino acid deletion).<sup>6,46</sup>

#### 5) Comment

*CHD2* mutations were implicated in epileptic encephalopathies (Carvill et al. 2013) while this manuscript was in preparation. The deletion in the two siblings with ASD identified in our study, together with the review of other cases, also implicates this gene in ASD. *CHD2* haploinsufficiency is highly penetrant (all cases with known inheritance are *de novo*), associated with ID and variably with epilepsy and ASD. Although the phenotype description is missing in several cases and is incomplete in others, precluding complete analyses, among 18 cases (the missense variant reported by Neale et al. not included), ID is reported in 16, epilepsy in 13 and autism/ASD in 6 cases. Language delay and/or limited speech are described in 5. Eight individuals are reported with dysmorphic features, usually mild. Features reported in 2 or more individuals include: strabismus or amblyopia (n=3), ear pits (n=2), hirsutism (n=2), and low posterior hairline (n=2). At least 4 had growth delay/short stature, and 2 have scoliosis, two phenotypes reported in heterozygous *Chd2* mice.

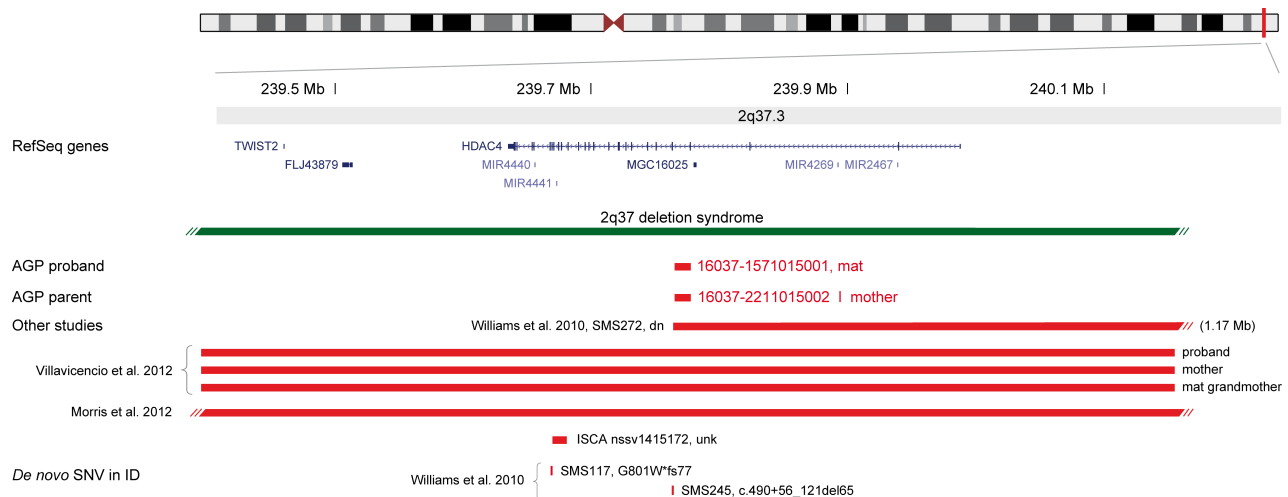

**Figure S7. CNV and SNV identified in *HDAC4* (histone deacetylase 4) in chromosome 2q37.3**

Chr2:239,350,000-240,180,000 (hg18). Abbreviations: dn, *de novo*; ID, intellectual disability; mat, maternal; unk, unknown inheritance

#### 1) AGP

- Proband 16037-1571015001, male, 12 kb intragenic deletion of *HDAC4*, removing exon 4 (chr2:239766528-239778481), maternal. Phenotype: autism (ADI-R and ADOS positive), language delay (first words and phrases 42 mo), functional language, WISC-III at 21 y: verbal IQ 72, performance IQ 87, full scale IQ 77. Born at 37 weeks of gestation, no congenital malformations, normal general exam. Had seizures at age 4-5 y, treated with Depakote; treatment stopped for 2-3 y without seizure activity. Unfortunately, we were unable to have the proband re-evaluated by a clinical geneticist to assess the presence of mild dysmorphic features and hand or feet abnormalities. The father has schizophrenia; the mother has depression, no other information is available about her phenotype.
- No *HDAC4* deletions among 4,768 controls and 4,874 parents (1 deletion in the mother of proband 16037-1571015001).

#### 2) Other human genetic evidence

- Over 120 individuals with 2q37 terminal deletions (2q37 deletion syndrome, also known as brachydactyly mental retardation syndrome) have been reported. Common features include developmental delay/ID, ASD, hypotonia, mild facial dysmorphism (frontal bossing, round face, depressed nasal bridge, abnormal or prominent ears, deep-set eyes, anteverted nares, and thin upper lip), short stature, obesity and brachymetaphalangy of digits 3-5 (>50%).<sup>47</sup> In 2010, haploinsufficiency of *HDAC4* was shown

to result in brachydactyly mental retardation syndrome. Williams et al.<sup>48</sup> described 5 individuals with 2q37 deletion syndrome in whom the smallest region of overlap contained only *HDAC4*. Sequencing of *HDAC4* identified *de novo* loss-of-function mutations in two additional subjects. Although *HDAC4* mutations may be causative for most of the features of the 2q37 microdeletion syndrome, other genes might also be involved, since individuals with distal deletions not including *HDAC4* have been reported with ID, ASD and seizures. Because no *HDAC4* mutations or single gene deletions had been reported previously in ASD, this gene was not yet considered as a cause of ASD (i.e. we had included it in the list of ID genes, not in the ASD list).

- 2q37 deletions as well as the 2 reported *HDAC4* mutations occur *de novo*, so the maternal transmission observed in the AGP proband would appear a highly unusual finding. However, a recent case report<sup>49</sup> described for the first time a deletion overlapping *HDAC4* inherited from a mildly affected parent (see below).

#### **CNV:**

As noted above, there are many large 2q37 deletions reported in the literature and in the databases. Here we review only cases with small deletions overlapping *HDAC4* and two recently reported familial cases.

- Villavicencio-Lorini et al.<sup>49</sup>: Report of the first three generation familial case of brachydactyly mental retardation syndrome with an interstitial 2q37.3 microdeletion of 758 kb (chr2:239395957-240154599). Subject 1: female index case, only child, motor development and growth delays during the first year of life, with subsequent catch up. When evaluated at 2 y 8 mo, she had midface hypoplasia, deep set eyes, posteriorly rotated and low-set ears, thin upper lip and pointed chin. Speech development was normal; she exhibited aggressive tantrums and sleep difficulties. Brachydactyly was excluded clinically and radiologically. Subject 2: 45-year-old mother of the index case, history of developmental and growth delays during childhood, but she was later able to attend normal school. She reported reduced spatial orientation and memory deficits. Examination revealed coarse facial appearance with broad and depressed nasal bridge, highly arched eyebrows, deep set eyes and narrow palpebral fissures; growth parameters were normal. Her hands and feet appeared normal, and brachydactyly was excluded radiologically. Subject 3: 68-year-old grandmother of the index case, she is the mother of subject 2, her only child. Family history revealed that her sister's daughter had ID with hydrocephalus and paraplegia of unknown cause. Subject 3 had severe osteoarthritis, dysmorphic facial features similar to those of her daughter with highly arched eyebrows, narrow palpebral fissures and everted full lips, with normal growth parameters. She communicated in simple sentences and her intellectual skills appeared to be lower than normal. Clinically her hands were normal.
- Morris et al.<sup>50</sup>: Report of a familial case of brachydactyly mental retardation syndrome, including a parent with mild symptoms and a child exhibiting a more severe phenotype. Cytogenetic testing showed a cryptic balanced translocation in the mother, t(2;10)(q37;q26), which resulted in a 9.84 Mb deletion on chromosome 2q37.1 (chr2:232810566-242654701) and a 10q26.1 duplication (chr10:131931089-135253240) in her son. *HDAC4* was deleted in the child but present and translocated in his mother. Interestingly, *HDAC4* expression in lymphocytes was 67% in the mother and 23% in the son compared to normal controls. Since the predicted expression after loss of one copy of *HDAC4* is ~50%, these findings suggest that there is an additional unknown mechanism decreasing *HDAC4* dosage, both in the mother and the child. Subject 1: male proband, only child; upon examination at the age of 15 y he was overweight (BMI 28), with short stature (-3 SD), facial dysmorphism with round face, prominent forehead, highly arched eyebrows, sparse hair, low-set ears, downslanted palpebral fissures, depressed nasal bridge, thin upper lip, and high palate. He also presented type E brachydactyly of fourth fingers and toes, and syndactyly of the second and third toes. Brain MRI showed abnormal gyration of the frontal lobes. He was schooled in a specialized institute. Subject 2: mother of subject 1, she had one previous termination of pregnancy for occipital meningoencephalocele. Family history showed a maternal aunt and three maternal cousins with ID. She presented with a similar dysmorphic features as her son (round face, prominent forehead, highly arched eyebrows, low-set ears and thin upper lip), short stature, obesity (BMI 45), and brachydactyly of the fourth finger of the right hand, and third and fourth fingers on the left. She had no obvious ID.
- ISCA: Subject nssv1415172, unknown gender, *HDAC4* intragenic deletion of 10 kb (chr2:239670063-239680639), inheritance unknown. Phenotype: developmental delay and additional significant developmental and morphological phenotypes referred for genetic testing.

### **3) Functional evidence**

- Histones play a critical role in transcriptional regulation, cell cycle progression, and development. Histone acetylation/deacetylation alters chromosome structure and affects transcription factor access to DNA. *HDAC4* encodes a histone deacetylase that shuttles between the nucleus and cytoplasm in response to calcium-regulated signals. *HDAC4* has been shown to regulate a transcriptional program essential for synaptic plasticity and memory; by repressing genes encoding synaptic proteins, it affects the strength and architecture of excitatory synapses.<sup>51</sup> Conditional deletion of *Hdac4* in mouse forebrain neurons leads to impairments in spatial learning and memory and long-term synaptic plasticity.<sup>52</sup>
- Highly expressed in the brain.

### **4) Comment**

Although many cases of 2q37 deletion syndrome with ASD have been reported in the literature, no deletion involving only *HDAC4* or mutation in this gene had been reported in individuals with ASD. The identification of an intragenic exonic deletion of the *HDAC4* gene in one AGP proband implicates haploinsufficiency of this gene as a cause for autism.

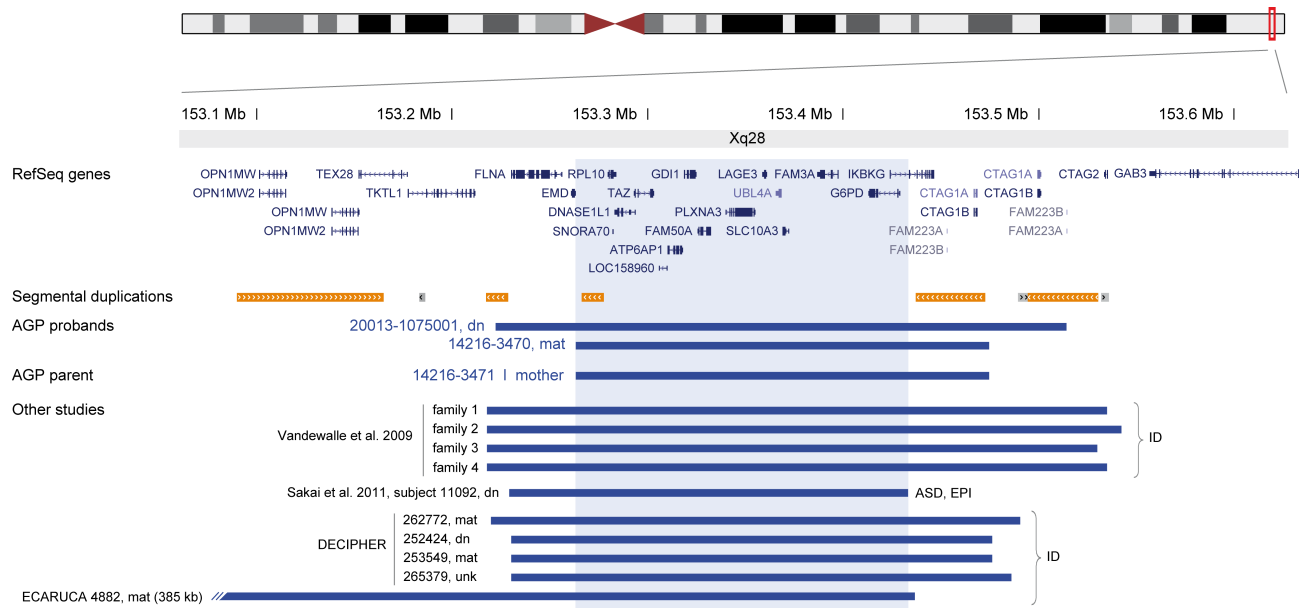

**Figure S8. Recurrent duplications at Xq28 including *GDI1* (GDP dissociation inhibitor 1)**

ChrX:153,085,000-153,640,000 (hg18). Abbreviations: ASD, autism spectrum disorder; dn, *de novo*; EPI, epilepsy; ID, intellectual disability; mat, maternal; unk, unknown inheritance

### 1) AGP

- Proband 20013-1075001, male, Xq28 duplication of 292 kb (chrX:153222048-153514311), *de novo*. The duplication encompasses 21 genes, including 3 genes involved in ID (*FLNA*, *GDI1*, *IKBKG*) and is flanked by segmental duplications. Phenotype: sporadic autism (ADI-R and ADOS positive), no language delay, normal IQ (WISC-III at 16 y: verbal IQ 93, performance IQ 94, full scale IQ 93), no dysmorphic features, head circumference -1.4 SD, normal neurological exam, no seizures.
- Proband 14216-3470, male, Xq28 duplication of 211 kb (chrX:153263157-153474401), maternally inherited. The duplication overlaps 19 genes, including 2 genes involved in ID (*GDI1*, *IKBKG*) and is flanked by segmental duplications. Phenotype: autism (ADI-R and ADOS positive), neurodevelopmental delay with onset at 2 y (first words 18 mo, first phrases 48 mo), mild ID (verbal IQ 61, performance IQ 65, full scale IQ 72), no dysmorphic features, sleep problems, no epilepsy. A brother with developmental delay also carries the duplication. He has a confirmed learning disorder and probably mild intellectual disability (he is an adult now and was not evaluated formally for this study).
- No similar duplications among 2,022 male controls and 2,441 fathers.

### 2) Other human genetic evidence

- Mutations in *GDI1* are a rare cause of nonsyndromic X-linked ID<sup>53,54</sup> and have not yet been reported in ASD.

### CNV:

- Vandewalle et al.<sup>55</sup>: Four unrelated families with X-linked ID with recurrent 0.3 Mb Xq28 copy number gain (153.20-153.54 Mb) mediated by segmental duplications. Only males are affected, carrier mothers show skewed X chromosome inactivation. The copy-number gain is variable, ranging from 2 to 5 copies, and includes *GDI1*, *FLNA* and *IKBKG*, involved in ID through mutations. The authors suggest *GDI1* is the most likely candidate gene; it is highly expressed in the brain and its expression in blood is correlated with the severity of the phenotype. *FLNA* duplications have been reported in four males with intestinal dysfunction, without ID<sup>56</sup> and in one male control in the Database of Genomic Variants (DGV); a duplication including *FLNA* and *IKBKG* was reported in a healthy male.<sup>55</sup>  
Family 1: four affected males in two generations, Xq28 copy number gain (chrX:153218000-153535000). Phenotype: non-syndromic moderate ID. Family 2: two affected brothers, Xq28 copy number gain (chrX:153218000-153542000). Phenotype: severe ID, epilepsy in the elder brother. Family 3: three affected males, Xq28 copy number gain (chrX:153218000-153530000). Phenotype: the index case presented with delayed speech, learning disabilities, and mild ID. All affected male subjects had moderate ID, a peculiar face with dysmorphic features, and macrocephaly. Reported previously as case 6 in Madrigal et al.<sup>57</sup>  
Family 4: male (sporadic case), Xq28 copy number gain (chrX:153218000-153535000). Phenotype: global psychomotor delay, mild dysmorphism.
- Sakai et al.<sup>58</sup>: Subject 11092, male, Xq28 duplication (chrX:153229170-153433332), *de novo*. Phenotype: ASD, history of seizures, normal IQ (verbal IQ 108, performance IQ 125, full scale IQ 109).



- DECIPHER: Subject 262772, male, Xq28 duplication (chrX:153219789-153490319), maternal. No phenotype information; the subject carries two other duplications (chr3:685234-1166340 and chr17:31862-164024), both inherited.
- DECIPHER: Subject 252424, male, Xq28 duplication (chrX:153230084-153475911), *de novo*. No phenotype information; the subject carries an additional CNV (chr1:91820025-92502808 duplication, *de novo*).
- DECIPHER: Subject 253549, male, Xq28 duplication (chrX:153230084-153475911), maternal. No phenotype information; only CNV reported in the subject.
- DECIPHER: Subject 265379, male, Xq28 duplication (chrX:153230109-153485889), unknown inheritance. Phenotype: ID, hypotonia, sleep apnea. Only CNV reported in the subject.
- ECARUCA: Subject 4882, male, Xq28 duplication (chrX:153051459-153436637), maternal. Phenotype: ID, spasticity/increased tendon reflexes, macrocephaly, constipation, short stature.  
(Three ISCA individuals with duplications of this region —2 with developmental delay, 1 with ASD— were not added because their gender is unknown.)

### 3) Functional evidence

- *GDI1* encodes the GDP-dissociation inhibitor alpha ( $\alpha$ GDI), which regulates the activity of small GTPases of the Rab family involved in intracellular vesicular trafficking. *Gdi1*-deficient mice exhibit membrane accumulation of Rab GTPases and decrease in the reserve pool of synaptic vesicles in the hippocampus, leading to altered synaptic plasticity and short-term memory deficits.<sup>59</sup>
- *GDI1* is highly expressed in the brain.

### 4) Comment

We identified two AGP probands with a recurrent Xq28 duplication corresponding to a genomic disorder recently described in ID. The identification of these two independent ASD cases, together with an ASD subject reported previously<sup>58</sup>, implicates duplications of this region in ASD. Among the genes contained in the region, aberrant gene dosage of *GDI1* is likely to be responsible for the neurodevelopmental phenotype of subjects carrying this CNV since mutations in this gene are involved in nonsyndromic X-linked ID<sup>53,54</sup> and the expression of *GDI1* in the blood of individuals with the Xq28 duplication correlated with the severity of the phenotype.<sup>55</sup> Finally, *GDI1* is highly expressed in the brain and its function in intracellular vesicular trafficking together with the synaptic phenotype of the *Gdi1*-deficient mice make this gene particularly interesting with regard to the ASD/ID phenotypes.

## Candidate genes affected by *de novo* CNV in AGP probands

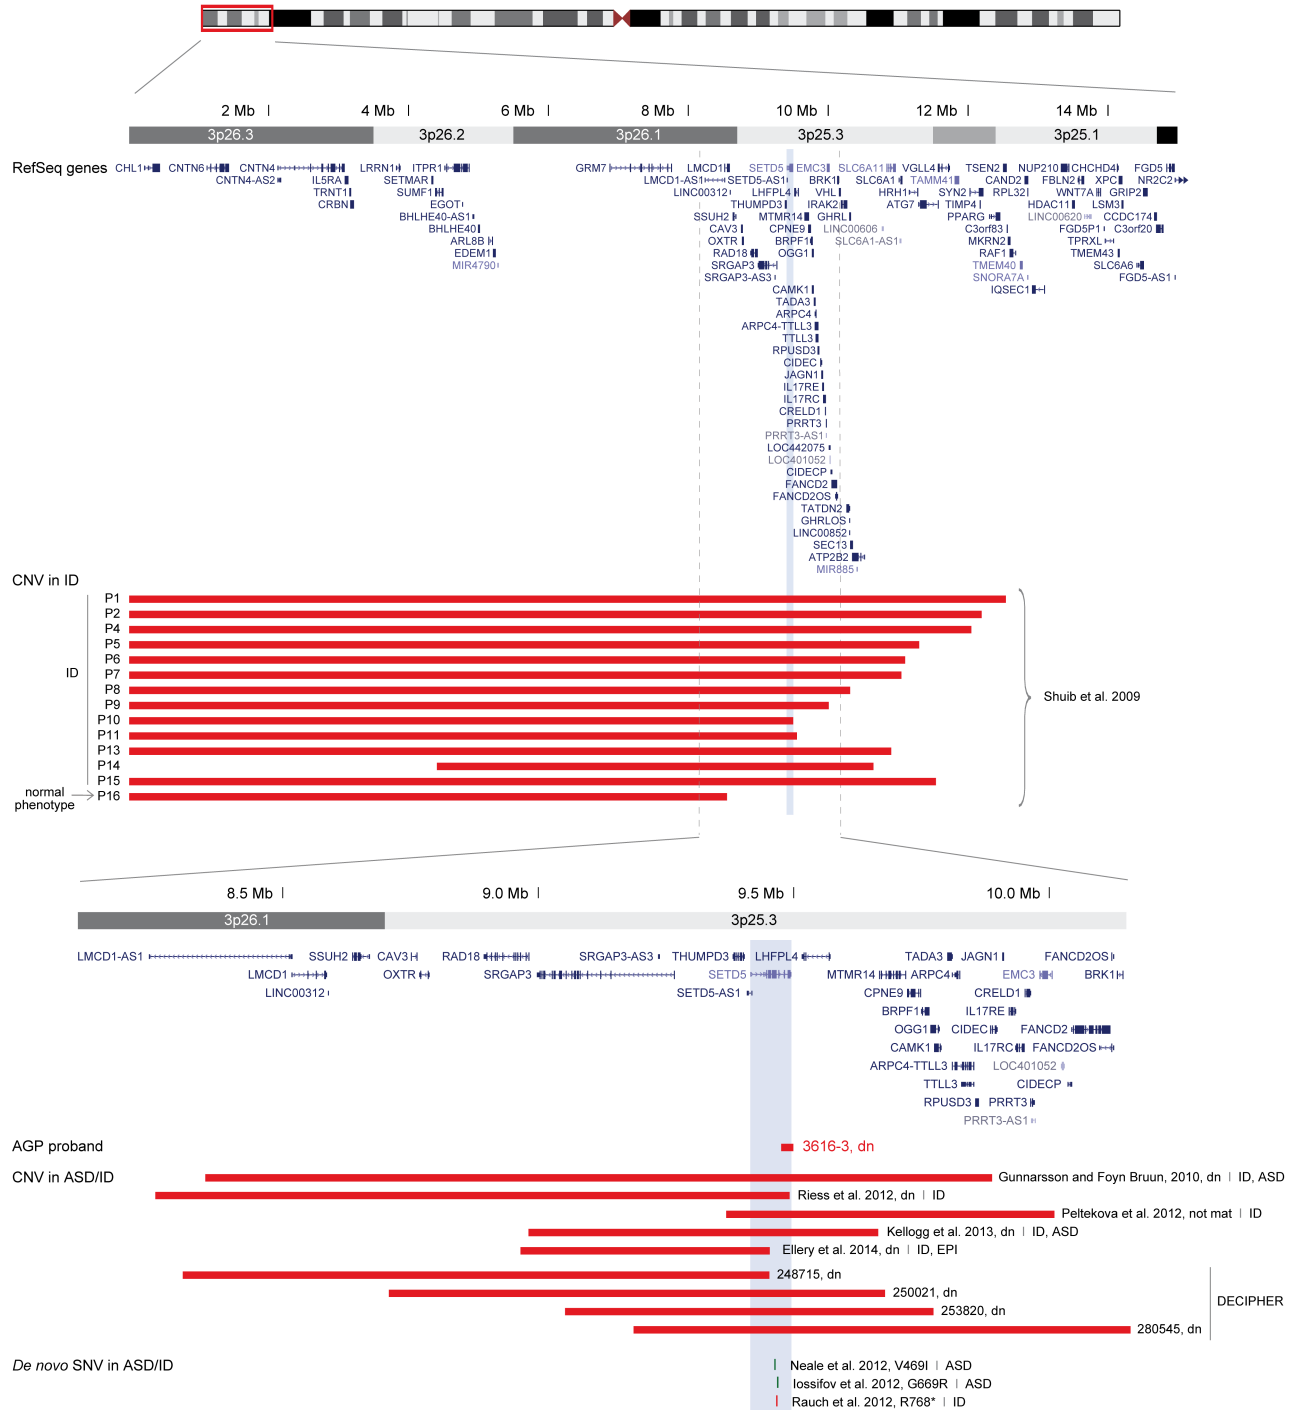

**Figure S9. CNV and SNV identified in *SETD5* (SET domain containing 5) in chromosome 3p25.3**

Chr3:1-15,000,000 (hg18). Abbreviations: ASD, autism spectrum disorder; dn, *de novo*; EPI, epilepsy; ID, intellectual disability; mat, maternal

### 1) AGP

- Proband 3616\_3, male, 24 kb deletion including only *SETD5* (chr3:9474320-9498362), *de novo*. Phenotype: Born at term after normal pregnancy and delivery. No feeding or sleep problems; body length and head circumference during the first year of life

were consistently between 0 to  $-1$  SD; walked at 15 mo, language delay (first words 24 mo), functional language, autism (meets criteria for autism on both ADI-R and ADOS), borderline IQ (WISC-III: verbal IQ 64, performance IQ 82, full scale IQ 70). Concerns about ADHD-like behavior in childhood, but did not fulfill criteria for ADHD and there are no concerns about hyperactivity at present. Normal vision and hearing; had sensory-integration training because of over and undersensitivity; asthma and hay fever, no other medical issues, no seizures. At 16 y, normal height and weight (50<sup>th</sup> centile), no obvious dysmorphic features (no ptosis, normal ears, nose and mouth), normal fingers and toes.

- No *SETD5* deletions among 4,768 controls and 4,875 parents.

## 2) Other human genetic evidence

- 3p deletion syndrome is a rare contiguous gene disorder resulting from terminal and interstitial deletions involving chromosome 3p25-p26. Common features include ID, growth retardation, microcephaly, dysmorphic facial features, and ptosis.<sup>60</sup> Rare individuals with a 3p26-p25 deletion and normal intelligence or only mild abnormalities have been reported, including several cases inherited from seemingly unaffected parents, indicating variable penetrance. There are over 30 individuals with 3p25-p26 deletions reported, the majority with large cytogenetically visible rearrangements, making delineation of the critical region and identification of candidate genes difficult. Shuib et al.<sup>60</sup> reported 14 individuals with cytogenetically visible deletions of 3p25, all with marked ID except one subject (P16) with a normal phenotype, ascertained incidentally because of recurrent miscarriages. Notably, the deletions in subjects with ID all overlapped *SETD5* whereas the subject without ID had the smallest terminal deletion, with a breakpoint proximal to *SETD5* (Figure S9). Here we review recently described cases with clinical features of distal 3p deletion syndrome carrying smaller interstitial deletions.

### CNV:

- Gunnarsson and Foy Bruun<sup>61</sup>: Female, 1.6 Mb 3p26.1-p25.3 deletion of 24 genes including *SETD5* (chr3:8305426-9885334), *de novo*. The girl was born at 37 weeks, with birth measures below  $-2$  SD. She was noted to have dysmorphic facial features (hypertelorism, ptosis, strabismus, flat and broad nasal root, long philtrum, downturned corner of the mouth, low set ears), bilateral overlap of the 2<sup>nd</sup> and 4<sup>th</sup> toes over the 3<sup>rd</sup> and 5<sup>th</sup> toes, atrial and ventricular septal defects, hypotonia, and severe developmental delay, with absent language at the age of 4 y. She showed autistic behavior; she smiled and laughed, but had poor eye contact and did not interact with other children, focusing on objects in her close vicinity. Vision, hearing, and growth were normal. At the age of 4, she had transient seizures, documented with EEG; a MRI showed asymmetry of thalamus. (Corresponds to subject 253231 in DECIPHER.)
- Riess et al.<sup>62</sup>: Female, 1.24 Mb 3p26.1-p25.3 deletion of 12 genes including *SETD5* (chr3:8250541-9491586), *de novo*. Normal birth measures, hypotonia during the first year of life, delayed psychomotor development. She started to walk and talk at the age of 2 y. On examination at the age of 3, she had large head (75<sup>th</sup> centile) compared to her height (10<sup>th</sup> centile), bilateral strabismus, large fontanelle, prominent forehead, depressed nasal bridge, thin upper lip and prominent philtrum. Ultrasound examinations of the heart and abdominal organs were normal.
- Peltekova et al.<sup>63</sup>: Female, 643 kb 3p25.3 deletion of 23 genes including *SETD5* (chr3:9367274-10010209), inheritance unknown (not maternal, father's DNA not available). The proband was born via cesarean section for breech presentation at 37 weeks gestation; birth weight 3<sup>rd</sup>-15<sup>th</sup> centile, length 5<sup>th</sup> centile, and head circumference 25<sup>th</sup> centile. She presented polydactyly in all four extremities, cleft palate, atrial septal defect, and bowel malrotation. At 1 year of age she developed tonic-clonic seizures and had episodes of aspiration pneumonia requiring placement of a gastrostomy tube. She was non-verbal as an adult, but smiled, laughed and was interactive. At 22 y her height and weight were  $<3$ <sup>rd</sup> centile, and head circumference was  $<5$ <sup>th</sup> centile. She had low anterior hairline, short forehead, thick eyebrows with synophrys, microphthalmia, downslanting palpebral fissures, blepharophimosis with mild ptosis, hypotelorism, esotropia, low set and cupped ears, and scoliosis. Hands and feet were small, with bilateral syndactyly of the 2<sup>nd</sup> and 3<sup>rd</sup> toes. Brain MRI showed parenchymal volume loss and atrophy of all structures except the brain stem.
- Kellogg et al.<sup>64</sup>: Female, 684 kb 3p25.3 deletion of 7 genes including *SETD5* (chr3:8980098-9664733), *de novo*. The proband was born at full term, with normal birth weight (50<sup>th</sup> centile) and length (90<sup>th</sup> centile). She had strabismus (corrected surgically) and developmental delay. Obsessive-compulsive disorder, with repetitively smelling of various objects, was noted at 10 y. On examination at age 11, she had dysmorphic features, including prominent ear lobes, right ear pit, depressed nasal bridge, anteverted nares, long philtrum, and proximally placed thumbs. Height, weight and head circumference were 50<sup>th</sup>, 10<sup>th</sup> and 50<sup>th</sup> centile, respectively; the brain MRI was normal. Assessment at 5 y 8 mo placed her in the borderline to intellectually disabled range (Stanford-Binet IV), and she met criteria for autism spectrum on ADOS.

The authors compared this individual with three previously reported cases with interstitial 3p25 deletions with ID and characteristic facial features<sup>61-63</sup> and identified a region of overlap including only three genes: *THUMP3*, *SETD5* and *SETD5-AS1*, which could play a critical role in the neurocognitive phenotype of the 3p deletion syndrome.

- Ellery et al.<sup>65</sup>: Male, 486 kb 3p25.3 deletion of 6 genes including *SETD5* (chr3:8965201-9450984), *de novo*. The proband was born at term with a birth weight of 4600 g, after a pregnancy marked by gestational diabetes. Bilateral postaxial polydactyly, a single palmar crease, right preauricular pit, mild hypertelorism, anteverted nostrils and micrognathia were noted at birth. Hypotonia, feeding difficulties and developmental delay became evident afterwards. A diagnosis of Simpson-Golabi-Behmel syndrome was considered. He walked independently at 4 y but tired easily; at 6 y his vocabulary was limited to two-dozen words and occasional

short sentences. He developed grand mal seizures at 7 y, treated with carbamazepine. He had a disturbed sleep pattern with frequent waking. On examination at 8 y of age, he had epicanthic folds, mild hypertelorism, high palate, myopathic facies with coarse features, and pectus excavatum. He had poor muscle bulk and showed a partial Gower's sign. These features persisted into adulthood.

- DECIPHER: Subject 248715, female, 1.1 Mb 3p26.1-p25.3 deletion of 12 genes including *SETD5* (chr3:8330935-9450984), *de novo*. Phenotype: ID/DD, macrocephaly, coarse facial features, synophrys, gum hypertrophy, low posterior/trident hairline, general abnormalities of hair texture. Only CNV reported in the subject.
- DECIPHER: Subject 250021, male, 946 kb 3p25.3 deletion of 10 genes including *SETD5* (chr3:8724500-9671040), *de novo*. No phenotype information; only CNV reported in the subject.
- DECIPHER: Subject 253820, male, 700 kb 3p25.3 deletion of 9 genes including *SETD5* (chr3:9061621-9763580), *de novo*. Phenotype: ID, hypertelorism, micrognathia, low-set ears, hydrocephalus, horseshoe kidney. Only CNV reported in the subject.
- DECIPHER: Subject 280545, male, 1.1 Mb 3p25.3 deletion of 33 genes including *SETD5* (chr3:9186364-10290795), *de novo*. Phenotype: global developmental delay, stereotypic behavior, absent speech, abnormality of the corpus callosum, abnormality of the hypothenar eminence, small thenar eminence, facial asymmetry and blepharophimosis. Only CNV reported in the subject.
- Note that several *SETD5* exonic deletions are reported in controls from DGV among non-BAC based studies, all from Shaik et al.;<sup>66</sup> these deletions are likely to be a study-specific artifact.

#### SNV:

- Neale et al.<sup>5</sup> (exome sequencing in ASD): Subject 09C98906, male, *SETD5* missense variant, *de novo*. The variant is predicted to be either benign (PolyPhen2, SNAP, Mutation Taster) or damaging (SIFT); the substituted residue is variable according to ConSurf (1/9); GERP score 1.91 (constrained >2). Phenotype: ASD, verbal IQ 93, performance IQ 112, full scale IQ 97.
- Iossifov et al.<sup>4</sup> (exome sequencing in ASD): Subject 13576, female, *SETD5* missense variant (gene listed as *KIAA1757*), *de novo*. The variant is predicted to be damaging (PolyPhen2, SNAP and Mutation Taster; not scored by SIFT). The substituted residue is variable according to ConSurf (1/9); GERP score 5.69. Phenotype: ASD (no other information provided).
- Rauch et al.<sup>41</sup> (exome sequencing in nonsyndromic sporadic ID): Subject ER14209, female, *SETD5* nonsense mutation, *de novo*. Phenotype: Born full term, weight  $-0.95$  SD, head circumference  $-1.46$  SD, sitting at 8 mo, walking at 20 mo, first words at 48 mo, IQ 70, mild attention deficit disorder, no ASD, no seizures, strabism, recurrent infections, constipation, prominent finger joints, facial dysmorphism. When last evaluated at 9 y, height  $-0.78$  SD, head circumference  $-1.16$  SD, spoke in fluent sentences.

#### 3) Functional evidence

- The gene is predicted to be a methyltransferase; several other genes encoding methyltransferases have been shown to be altered in ASD/ID (see examples below).
- Expressed in the brain.

#### 4) Other evidence

- % HI = 21.3 (0%-10%: likely to be haploinsufficient; 90%-100%: not likely to be haploinsufficient)
- Haploinsufficiency of *NSD1* (nuclear receptor binding SET domain protein 1), encoding a histone methyltransferase, causes Sotos syndrome, a neurodevelopmental disorder characterized by overgrowth, distinctive craniofacial appearance, and variable ID, sometimes associated with ASD.<sup>67,68</sup>
- Another gene encoding a histone methyltransferase, *EHMT1* (euchromatic histone-lysine N-methyltransferase), is involved in Kleefstra syndrome through deletions (9q34.3 deletion syndrome) or mutations. *EHMT1* haploinsufficiency is associated with ID and sometimes with ASD.<sup>69</sup> An AGP proband with a 9q34.3 deletion encompassing *EHMT1* was identified in the present study (proband 6259-3, **Table S7B**).

#### 5) Comment

The minimal region of overlap between our proband and those of 9 other cases with deletions involving 3p25.3 reviewed here contains only *SETD5*. Remarkably, all deletions are *de novo*. This finding, together with the recent report of a *de novo* loss-of-function mutation in a subject with language delay and borderline IQ (70, like in our proband)<sup>41</sup> suggest that *SETD5* is involved in cognitive, social, and language development. Therefore, *SETD5* could be associated with these features in 3p deletion syndrome. Two other *de novo* variants, identified in whole exome studies in ASD,<sup>4,5</sup> are missense changes and their functional effect is difficult to predict.

Interestingly, the AGP proband with the intragenic *SETD5* deletion, as well as the subject with the *SETD5* loss-of-function mutation, have a borderline IQ (70), whereas other individuals with larger deletions have ID ranging from severe to moderate, suggesting that other genes in the region contribute to the cognitive deficit associated with 3p deletions. Similarly, our proband lacks some of the characteristic but variable features associated with the 3p deletion syndrome, including growth retardation and dysmorphic features, such as ptosis and depressed nasal bridge.

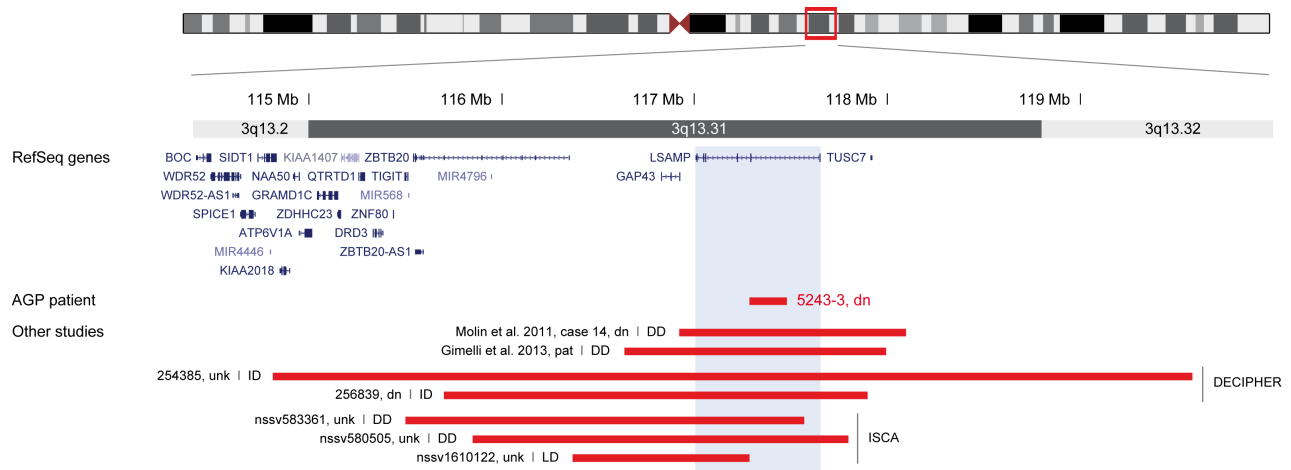

**Figure S10. CNV identified in *LSAMP* (limbic system-associated membrane protein) in chromosome 3q13.31**

Chr3:114,400,000-120,000,000 (hg18). Abbreviations: dn, *de novo*; DD, developmental delay; ID, intellectual disability; LD, learning disability; pat, paternal; unk, unknown inheritance

### 1) AGP

- Proband 5245\_3, male, 192 kb deletion including only *LSAMP* (chr3:117285007-117477191), *de novo*. The deletion was shown to be mosaic; the percentage of mosaicism was estimated at 50% of deleted cells using a formula based on the deviation of the B allele frequency distribution.<sup>70</sup> Phenotype: born at 29 wks, intraventricular hemorrhage, mild cerebral palsy; autism (based on ADI-R and ADOS), low non-verbal IQ (<1<sup>st</sup> centile), language delay (1<sup>st</sup> centile), apraxia, abnormal sleep EEG without seizures; alopecia areata, no dysmorphic features. Multiplex family, a sister with ASD doesn't carry the CNV.
- No exonic deletions of *LSAMP* among 4,768 controls and 4,875 parents (1 control and 1 mother have intronic deletions).

### 2) Other human genetic evidence

#### CNV:

- Molin et al.<sup>71</sup>: Subject 14, male, 1.18 Mb 3q13.31 deletion (chr3:116922662-118098190) containing three genes, *GAP43*, *LSAMP* and *TUSC7*. Uncertain inheritance (absent in the mother and father not tested). Five year old boy with developmental delay; no other phenotype information provided. *GAP43* is found in growth cones of extending axons in the central nervous system. (Corresponds to subject 252520 in DECIPHER.)
- Gimelli et al.<sup>72</sup>: Girl with 1.36 Mb 3q13.31 deletion (chr3:116640577-118002810) containing three genes, *GAP43*, *LSAMP*, and *TUSC7*. The deletion was inherited from the father, who had slightly delayed psychomotor development but his cognitive level was not tested. The proband had developmental delay, clumsiness and attention deficit, associated with renal, vascular and skeletal anomalies.
- DECIPHER: Subject 254385, female, 4.8 Mb 3q13.2-q13.32 deletion involving *LSAMP* (chr3:114813585-119579912), inheritance unknown. Phenotype: ID, muscular hypotonia, downslanted palpebral fissures, joint laxity, open mouth. Only CNV reported in the subject.
- DECIPHER: Subject 256839, female, 2.2 Mb 3q13.31 deletion involving *LSAMP* (chr3:115701890-117895614), *de novo*. Phenotype: ID, broad nasal tip, short nose, anteverted nares. Only CNV reported in the subject.
- ISCA: Subject nssv583361, unknown gender, 2 Mb 3q13.31 deletion involving *LSAMP* (chr3:115499855-117567970), inheritance unknown. Phenotype: developmental delay and additional significant developmental and morphological phenotypes referred for genetic testing.
- ISCA: Subject nssv580505, unknown gender, 1.9 Mb 3q13.31 deletion involving *LSAMP* (chr3:115850559-117797499), inheritance unknown. Phenotype: global developmental delay.
- ISCA: Subject nssv1610122, unknown gender, 918 kb 3q13.31 deletion involving *LSAMP* and *GAP43* (chr3:116367264-117285252), inheritance unknown. Phenotype: specific learning disability.

### 3) Functional evidence

- *LSAMP* encodes a neuronal surface glycoprotein belonging to the cell adhesion molecule (CAM) family, found in cortical and subcortical regions of the limbic system. During development of the limbic system, it is found on the surface of axonal membranes and growth cones, where it acts as a selective homophilic adhesion molecule, and guides the development of specific

patterns of neuronal connections. *LSAMP* mediates selective neuronal growth and axon targeting and also contributes to the guidance of developing axons and remodeling of mature circuits in the limbic system. This protein is essential for normal growth of the hippocampal mossy fiber projection.<sup>73</sup> *Lsamp*<sup>-/-</sup> mice have normal gross neuroanatomical organization but display heightened reactivity to novelty, reduced anxiety-like behaviors, impaired synaptic plasticity, and spatial memory deficit.<sup>74,75</sup> *LSAMP* has also been shown to function as a tumor suppressor gene.

- Brain expression: *LSAMP* is expressed on limbic regions but also, less intensely, in midbrain and hindbrain regions.

#### 4) Other evidence

- % HI = 10.5 (likely to be haploinsufficient)

#### 5) Comment

The minimal region of overlap between our proband and seven other cases with 3q13.31 deletions reviewed here contains only the *LSAMP* gene. All cases with known inheritance are *de novo* and would thus support involvement of deletions in this region in neurodevelopmental disorders. Other cases with deletions involving only *LSAMP* or deleterious mutations are needed to implicate this gene in ASD and ID.

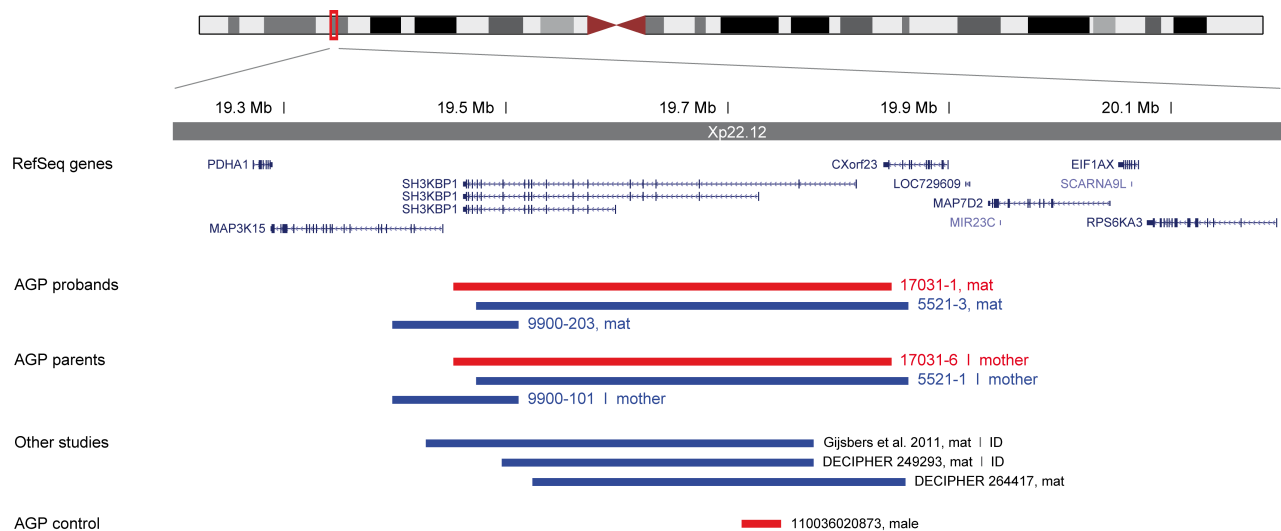

**Figure S11. CNV identified in *SH3KBP1* (SH3-domain kinase binding protein 1) in chromosome Xp22.12**

ChrX:19,200,000-20,200,000 (hg18). Abbreviations: ID, intellectual disability; mat, maternal

#### 1) AGP

- Proband 17031\_1, male, deletion involving *SH3KBP1* and *CXorf23* (chrX:19450969-19845766), maternal. *CXorf23* encodes a protein of unknown function. Phenotype: autism (based on ADI-R and ADOS), language delay, functional language, verbal IQ 79; physical examination at 5 y 8 mo revealed no dysmorphic features, neurological examination was normal except for a deficit in coordination and gross and fine motor development; no seizures, normal sleep EEG. Sporadic case, mother unaffected, negative family history of neuropsychiatric disorders.
- Proband 5521\_3, male, partial duplication of *SH3KBP1* and *CXorf23* (chrX:19471138-19861338), maternal. Phenotype: autism (based on ADI-R and ADOS), below average IQ (<1<sup>st</sup> centile), nonverbal, seizure disorder, coarse facial features. Sporadic case, mother unaffected.
- Proband 9900\_203, male, partial duplication of *SH3KBP1* and *MAP3K15* (chrX:19396116-19509785), maternal. Expression study in cell lines showed no increased expression of *SH3KBP1*. The CNV also involves *MAP3K15*, encoding a mitogen-activated protein (MAP) kinase expressed in the brain. Phenotype: autism (meets criteria on ADI-R and ADOS), language delay (first words 18 mo, first phrases 42 mo), limited language, moderate ID (Bayley Scales of Infant Development II, mental developmental index 45), strabismus (like his mother), normal physical exam, no dysmorphic features, no epilepsy. Sporadic case, mother unaffected.
- 1 of 2,022 male controls carries a *SH3KBP1* deletion overlapping only exon 1 of transcript variant 2, not present in other isoforms (chrX:19710729-19746114); no deletions among 2,441 fathers.

## 2) Other human genetic evidence

### CNV:

- Gijsbers et al.<sup>76</sup>: Male, 349 kb duplication overlapping partially 2 genes, *SH3KBP1* and *MAP3K15* (chrX:19425768-19775308), maternal. Phenotype: growth retardation, severe ID, absent or delayed speech, stereotypic movement of head and hands, bitemporal narrowing, narrow palpebral fissures, deep-set eyes, large mouth, widely spaced teeth. The healthy mother and grandmother carried the same Xp22.12 duplication and showed skewed X inactivation. The authors interpreted the CNV as potentially pathogenic.
- DECIPHER: Subject 249293, male, intragenic *SH3KBP1* duplication (chrX:19494754-19775308), maternal. Phenotype: ID, narrow forehead, abnormality of the eyebrow, deep set eyes, abnormality of the mouth, widely spaced teeth, proportionate short stature, abnormal CNS myelination. Only CNV reported in the subject.
- DECIPHER: Subject 264417, male, duplication overlapping partially 2 genes, *SH3KBP1* and *Cxorf23* (chrX:19521667-19858019), maternal. No phenotype information; only CNV reported in the subject.

### 3) Functional evidence

- The *SH3KBP1* gene encodes CIN85, an endocytic scaffold protein that facilitates protein-protein interactions and has been implicated in numerous cellular processes including apoptosis, cytoskeletal rearrangement, cell adhesion and clathrin-dependent endocytosis. CIN85 plays a role in receptor internalization, including dopamine receptors and epidermal growth factor receptor.<sup>77,78</sup> CIN85 localizes at synapses and interacts with the scaffold protein S-SCAM via dendrin.<sup>79</sup>
- Mice lacking CIN85 exon 2 (present in both isoforms expressed in the central nervous system) show hyperactivity and increased exploratory behavior, but no alterations in synaptic plasticity or learning and memory. These mice show increased dopamine and dopamine D2 receptors in the striatum, due to impaired endocytic internalization of D2 receptors.<sup>77</sup>
- Expressed in the brain.

### 4) Comment

The deletion in proband 17031\_1 results in a *SH3KBP1* null allele. The intragenic duplication in DECIPHER subject 249293 is also likely to disrupt the gene, acting as a deletion. In contrast, the functional consequence of the partial duplications observed in AGP probands 5521-3 and 9900-203, and in the two other subjects (<sup>76</sup> and DECIPHER 264417) are difficult to predict and thus can not be counted as evidence in favor of the implication of *SH3KBP1* alterations in neurodevelopmental disorders, in the absence of expression studies. In one proband (9900\_203) in whom we evaluated *SH3KBP1* mRNA expression in cell lines, no alteration was observed. Other affected males with deletions, intragenic duplications or deleterious mutations of *SH3KBP1* are required to implicate loss of function of this gene in ASD and ID.

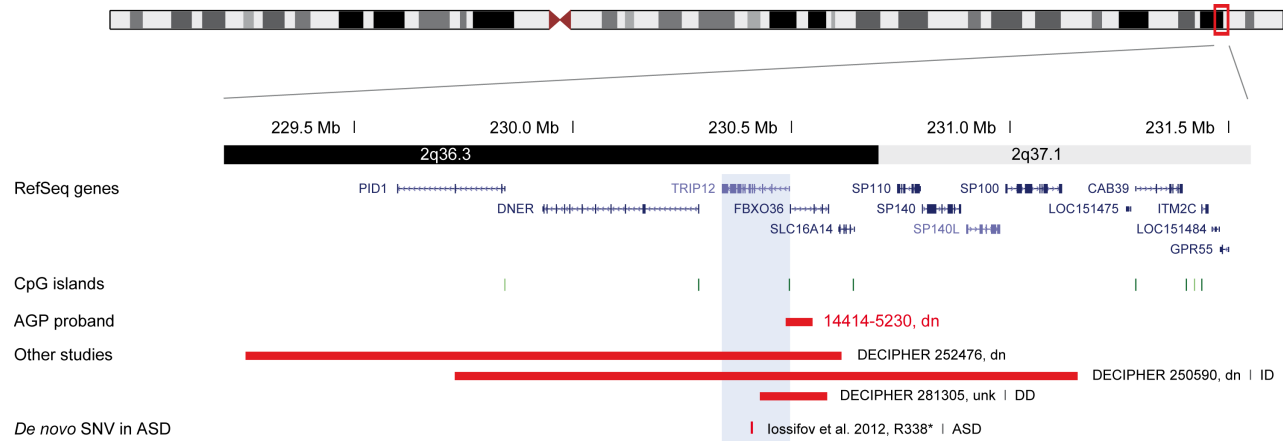

**Figure S12. CNV and SNV identified in *TRIP12* (thyroid hormone receptor interactor 12) in chromosome 2q36.3**

Chr2:229,200,000-231,550,000 (hg18). Abbreviations: ASD, autism spectrum disorder; DD, developmental delay; dn, *de novo*; ID, intellectual disability; unk, unknown inheritance

### 1) AGP

- Proband 14414\_5230, male, 60 kb deletion involving 2 genes, *TRIP12* and *FBXO36* (chr2:230486629-230547253), *de novo*. The deletion only involves the first exon of *TRIP12*, which is non-coding, but seems to be part of the promoter of the gene since a CpG island is located in this region. The other deleted gene, *FBXO36*, encodes a F-box protein that plays a role in ubiquitination and is

not likely to be haploinsufficient (% HI = 52.9). Phenotype: autism (ADI-R and ADOS positive), no language delay (first words 12 mo, first phrases 24 mo), verbal, Griffiths at 5 y 9 mo: language DQ 87, performance DQ 78, global DQ 79.

- No *TRIP12* deletions among 4,768 controls and 4,875 parents.

## 2) Other human genetic evidence

### CNV:

- DECIPHER: Subject 252476, female, 1.4 Mb deletion involving *TRIP12* (chr2:229250832-230614988), *de novo*. No phenotype information; only CNV reported in the subject.
- DECIPHER: Subject 250590, female, 1.4 Mb deletion involving *TRIP12* (chr2:229728861-231153046), *de novo*. Phenotype: ID, delayed speech and language development, epicanthus, hypermetropia, low hanging columella, palpebral edema, broad philtrum, thin upper lip vermillion, wide mouth. Only CNV reported in the subject.
- DECIPHER: Subject 281305, male, 144 kb deletion involving *TRIP12* (chr2:230432282-230576372), inheritance unknown. Phenotype: global developmental delay and cystic renal dysplasia. Only CNV reported in the subject.

### SNV:

- lossifov et al.<sup>4</sup> (exome sequencing in ASD): Subject 12867, female, *TRIP12* *de novo* nonsense mutation. Phenotype: ASD (no other information provided).

## 3) Functional evidence

- *TRIP12* encodes a HECT-type E3 ubiquitin-ligase, which plays a role in degradation of ubiquitin fusion substrates and can regulate chromatin function to maintain genome integrity.<sup>80</sup>
- Expressed in the brain.

## 4) Other evidence

- % HI = 5.3 (highly likely to be haploinsufficient)
- *HUWE1*, mutated in X-linked ID, also encodes a HECT-type E3 ubiquitin-ligase involved in the ubiquitin-fusion degradation (UFD) pathway. Double knock-down of *HUWE1* and *TRIP12* results in additive stabilization of an UFD substrate, suggesting functional redundancy between both proteins.<sup>81</sup>

## 5) Comment

The evidence from the AGP subject is not very strong; although the *TRIP12* deletion is *de novo*, only the first non-coding exon is involved and the effect on the protein is difficult to predict. Expression studies are necessary to interpret the clinical significance of this CNV. The support from other human genetic studies is limited, but the *de novo* loss-of function *TRIP12* mutation in a female with ASD identified in an exome sequencing study, together with the function of the protein, make this gene an interesting candidate for ASD.

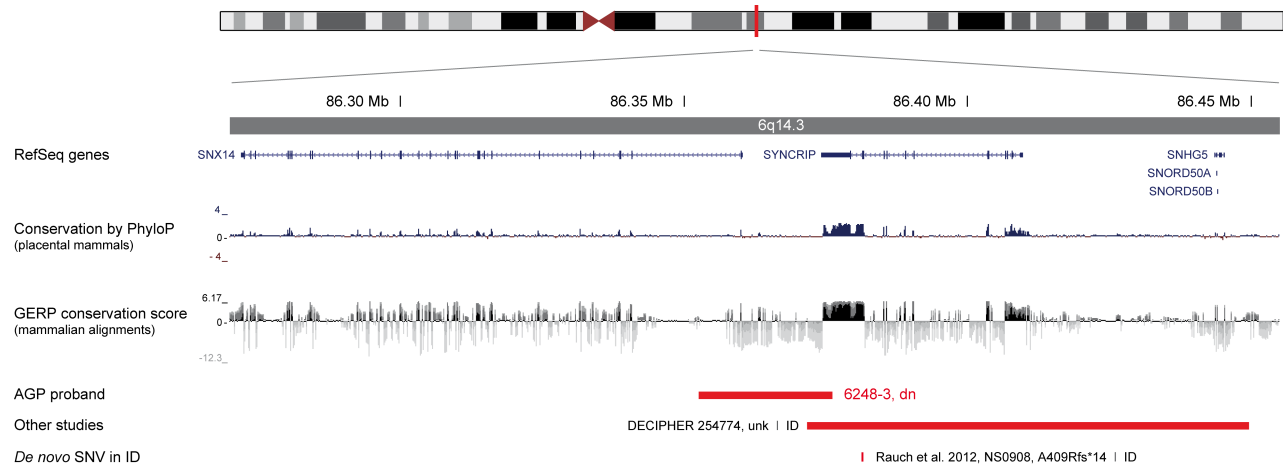

**Figure S13. CNV and SNV identified in *SYNCRIP* (synaptotagmin binding, cytoplasmic RNA interacting protein) in chromosome 6q14.3**

Chr6:86,270,000-86,455,000 (hg18). Abbreviations: dn, *de novo*; ID, intellectual disability; unk, unknown inheritance



### 1) AGP

- Proband 6248\_3, male, 23 kb deletion involving 2 genes, *SYNCRIP* and *SNX14* (chr6:86352577-86376159), *de novo*. The deletion only involves the 3' untranslated region (UTR) of *SYNCRIP*; this region might contain regulatory elements that are crucial for gene expression. *SNX14* encodes a member of the sorting nexin family that are involved in intracellular trafficking; this gene is not predicted to be haploinsufficient (% HI = 58.6), but its contribution to the phenotype can not be ruled out. Phenotype: autism, severe ID, no language; born by C-section with increased height and head circumference. One absence seizure at 11 y, with abnormal EEG, probably related to medications taken at that time, no other seizures afterwards. At 15 y: height >+3 SD, macrocephaly (head circumference >+3 DS) (his unaffected father and 2 brothers are also very tall and have macrocephaly); long and narrow hands and feet, 2 café-au-lait spots, normal neurological exam.
- No *SYNCRIP* deletions among 4,768 controls; 1 carries a partial *SYNCRIP* duplication (chr6:86382351-87814038); no CNV overlapping *SYNCRIP* in 4,875 parents.

### 2) Other human genetic evidence

#### CNV:

- DECIPHER: Subject 254774, male, 78 kb deletion including *SYNCRIP* (chr6:86371713-86449627), inheritance unknown. The deletion also involves *SNHG5* (snoRNA host gene) as well as *SNORD50A* and *SNORD50B* (snoRNAs). Only CNV reported in the subject. Phenotype: ID.

Note that there are several large deletions (>5 Mb) overlapping this gene in DECIPHER and ISCA, not reviewed here.

#### SNV:

- Rauch et al.<sup>41</sup> (exome sequencing in nonsyndromic sporadic ID): Subject NS0908, female, *SYNCRIP* frameshift mutation, *de novo*. Phenotype: severe nonsyndromic sporadic ID (IQ <50), myoclonic astatic seizures (onset at 13 mo), no ASD, MRI at 24 mo: prominent lateral ventricles.

### 3) Functional evidence

- *SYNCRIP* encodes a nuclear ribonucleoprotein implicated in mRNA processing mechanisms including mRNA stability and transport, RNA editing and splicing and localized mRNA translation. *SYNCRIP* is a component of mRNA transport granules in dendrites.<sup>82</sup> Selective mRNA transport, local translation and subsequent protein synthesis in neuronal dendrites are part of the fundamental mechanisms involved in synaptic plasticity, learning and memory.
- Other RNA binding proteins have been implicated in ID and ASD, including FMRP, involved in fragile X syndrome, the most frequent monogenic cause of ID and ASD, and ZC3H14, involved in recessive non-syndromic ID.<sup>83</sup>
- Expressed in the brain.

### 4) Other evidence

- % HI = 1.5 (highly likely to be haploinsufficient)

### 5) Comment

The AGP proband carries a *de novo SYNCRIP* deletion that only affects the highly conserved 3'UTR of the gene. Expression studies are necessary to determine the effects of the deletion. Although this gene does not have support from many other CNV studies, the *de novo* loss-of function *SYNCRIP* mutation reported in an individual with ID and the function of the encoded protein make this gene a strong candidate for involvement in neurodevelopmental disorders. Additional cases with small deletions affecting *SYNCRIP* and/or with deleterious mutations are required to implicate this gene definitely in ASD, ID and other neurodevelopmental phenotypes.

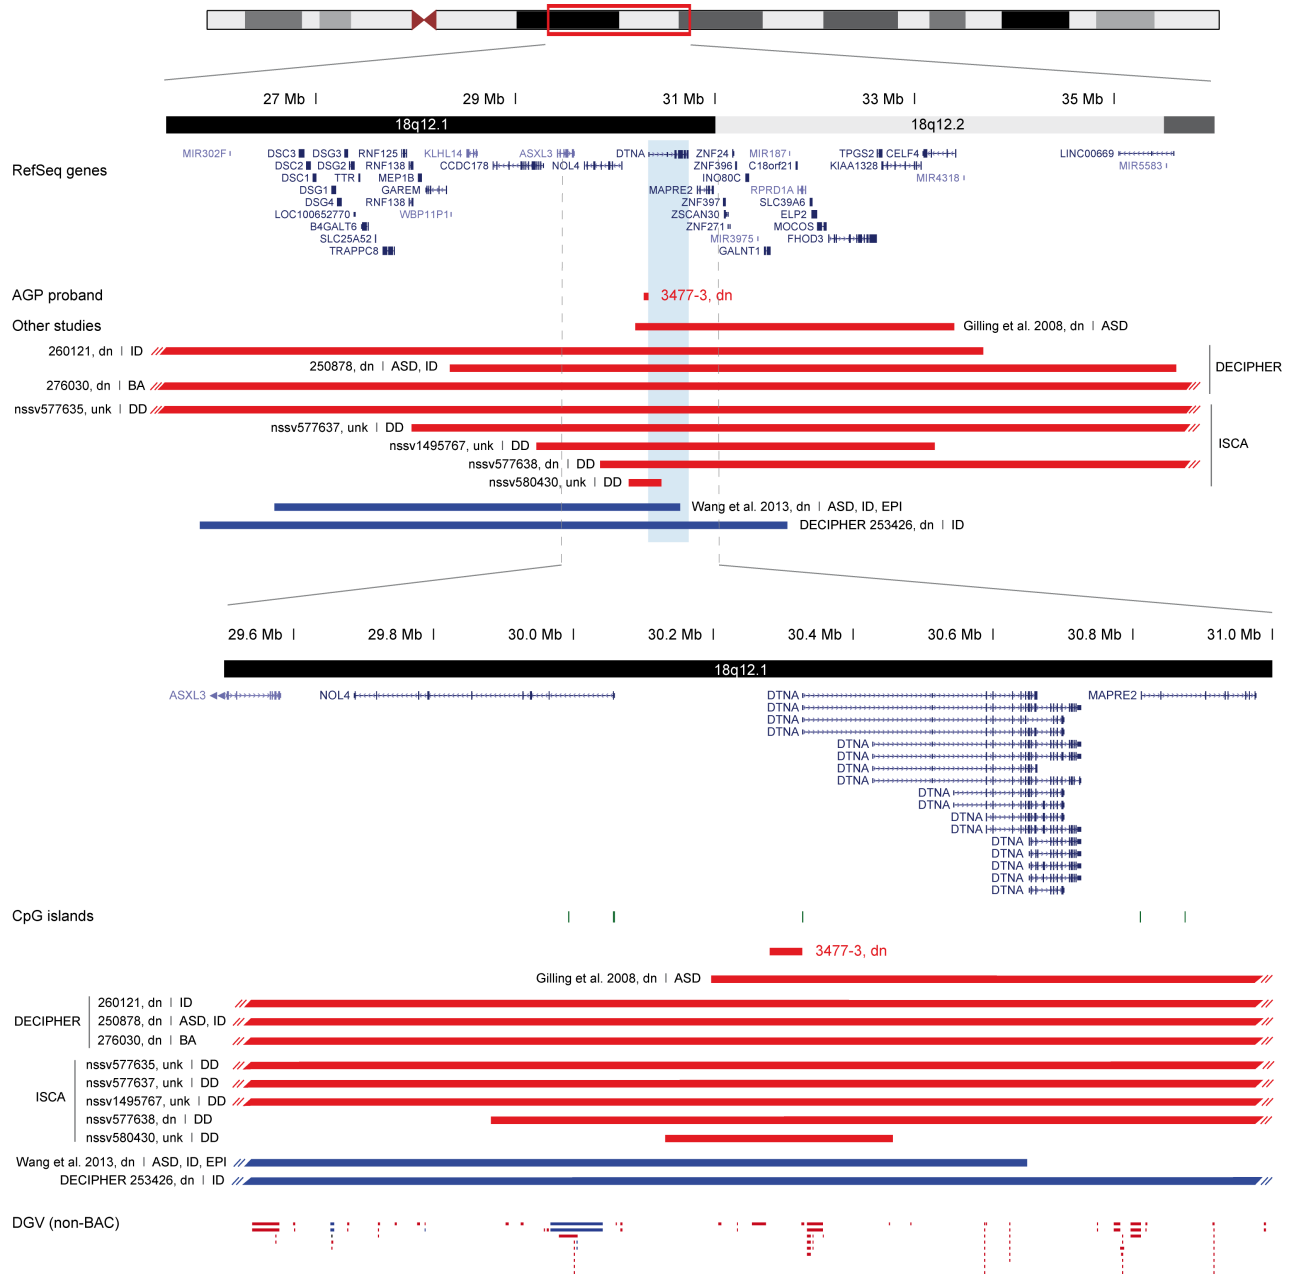

**Figure S14. CNV identified in *DTNA* (dystrobrevin alpha) in chromosome 18q12.1**

Chr18:25,500,000-36,000,000 (hg18). Abbreviations: ASD, autism spectrum disorder; BA, behavioral/psychiatric abnormality; dn, *de novo*; DD, developmental delay; EPI, epilepsy; ID, intellectual disability; unk, unknown inheritance

**1) AGP**

- Proband 3477\_3, male, 47 kb deletion involving *DTNA* (chr18:30280260-30327512), *de novo*. Only the first non-coding exon of the longer isoforms of *DTNA* (2, 5, 7 and 17) is disrupted by the deletion. It may be part of the promoter of the gene since a CpG island is located in the region. Phenotype: ASD (ASD on ADI-R, autism on ADOS), verbal; WISC-R at 5 y 7 mo: verbal IQ 88, performance IQ 88, full scale IQ 86; no cardiovascular or neuromuscular abnormalities.
- No *DTNA* deletions among 4,768 controls and 4,875 parents.

**2) Other human genetic evidence**

**CNV:**

- Gilling et al.<sup>84</sup>: Female, *de novo* translocation t(5;18)(q34;q12.2), with a 3.2 Mb deletion at the 18q breakpoint encompassing 20 genes including *DTNA* (chr18:30197000-33392000); the breakpoint on 5q did not contain any known genes. She also carried a

1.27 Mb deletion on chromosome 4q35, containing two genes (*MTNR1A* and *FAT*); inherited from her father. Phenotype: born at term, prolonged delivery with asphyxia noted at birth. She presented mild cerebral palsy, language delay, autism (met criteria on ADI-R and ADOS), no ID (WAIS-R at 34 y: verbal IQ 78, performance IQ 105, full scale IQ 88), high-grade myopia, no dysmorphism, hyperflexible joints, no seizures.

- DECIPHER: Subject 260121, female, 13.4 Mb 18q12.1 deletion (chr18:20286120-33684898), *de novo*. Phenotype: ID, abnormality of the face, malformation of the heart and great vessels. Only CNV reported in the subject.
- DECIPHER: Subject 250878, male, 7.3 Mb deletion including *DTNA* (chr18:28338083-35619727), *de novo*. Phenotype: ID (full scale IQ 40-50), autism, delayed speech and language development, flat occiput, hypotelorism, narrow nasal bridge, narrow nares, narrow mouth, high palate, wide intermamillary distance, absent nipples, proximal placement of thumb, hypotonia, tall stature, abnormality of the male genitalia. This individual also carries a duplication involving 3 genes, *HAO1*, *TMX4* and *PLCB1* (chr20:7022125-8482355), inherited from a normal parent.
- DECIPHER: Subject 276030, male, 14.5 Mb deletion including *DTNA* (chr18:25269813-39765123), *de novo*. The deletion is mosaic (percentage of mosaicism not indicated). Phenotype: behavioral/psychiatric abnormality, autoaggression and motor delay. Only CNV reported in the subject.
- ISCA: Subject nsv577635, unknown gender, 10.9 Mb 18q12.1 deletion including *DTNA* (chr18:25278473-36237614), inheritance unknown. Phenotype: developmental delay and additional significant developmental and morphological phenotypes referred for genetic testing.
- ISCA: Subject nsv577637, unknown gender, 11.9 Mb 18q12.1 deletion including *DTNA* (chr18:27945491-39904182), inheritance unknown. Phenotype: global developmental delay, muscular hypotonia, short stature.
- ISCA: Subject nsv1495767, unknown gender, 4 Mb deletion including *DTNA* (chr18:29207760-33198709), inheritance unknown. Phenotype: developmental delay and additional significant developmental and morphological phenotypes referred for genetic testing.
- ISCA: Subject nsv577638, unknown gender, 7.3 Mb 18q12.1 deletion including *DTNA* (chr18:29881080-37228316), *de novo*. Phenotype: global developmental delay, strabismus, stridor.
- ISCA: Subject nsv580430, unknown gender, deletion involving only *DTNA* (chr18:30131834-30456329), inheritance unknown. Only the first non-coding exon of the longer isoforms (2, 5, 7 and 17) is disrupted by the deletion, which is very similar to the one observed in the AGP proband 3477-3. Phenotype: developmental delay and additional significant developmental and morphological phenotypes referred for genetic testing.
- Wang et al.<sup>85</sup>: Female, 4.1 Mb duplication including *DTNA* (chr18:26587700-30649280), *de novo*. Phenotype: autistic disorder (met criteria on ADI-R and ADOS), language delay, non-verbal, mild ID, focal epilepsy, short stature (5<sup>th</sup> centile), no dysmorphic features, mild myopia.
- DECIPHER: Subject 253426, male, 5.9 Mb duplication including *DTNA* (chr18:25834124-31721175), *de novo*. Phenotype: moderate ID (WAIS-IV full scale IQ 51), no ASD, recurrent seizures, facial dysmorphism, short stature, Chiari malformation, cryptorchidism, strabismus. Only CNV reported in the subject.

The smallest region of overlap among these 11 cases contains only the *DTNA* gene.

#### SNV:

- Ichida et al.<sup>86</sup>: Heterozygous missense mutation in *DTNA* in a large pedigree with left ventricular non compaction (family NVLNC-09), no neurological/behavioral phenotype described. No other *DTNA* mutations reported in the literature.

### 3) Functional evidence

- *DTNA* belongs to the dystrobrevin subfamily of the dystrophin family, like *DMD*, involved in Duchenne's/Becker muscular dystrophy, sometimes associated with ID/ASD.<sup>87,88</sup> Dystrobrevin alpha is part of the transmembrane dystrobrevin-associated protein complex (DPC), which participates in synaptic transmission at the neuromuscular junction, long-term memory and synaptic plasticity.<sup>89</sup>
- $\alpha$ -dystrobrevin knockout mice exhibit mild muscular dystrophy but show no obvious CNS defects, likely reflecting coexpression of the homolog  $\beta$ -dystrobrevin, which is predominantly expressed in the brain.<sup>90</sup> Double mutants lacking both  $\alpha$ -dystrobrevin and  $\beta$ -dystrobrevin exhibit synaptic and behavioral defects similar to those seen in dystrophin-deficient mice.<sup>91</sup> Both dystrobrevin isoforms are required for the maturation and function of a subset of inhibitory synapses in the cerebellum and for correct execution of motor behaviors that depend on cerebellar integrity.<sup>91</sup>
- Expressed in the brain.

### 4) Other evidence

- % HI = 3.2 (highly likely to be haploinsufficient)
- Upregulation of *DTNA* has been reported in the temporal cortex of subjects with autism<sup>92</sup> and in the prefrontal cortex of individuals with bipolar disorder.<sup>93</sup>

- Dystrobrevin immunostaining is severely reduced at the sarcolemma of individuals with Duchenne muscular dystrophy and to a lesser extent in individuals with Becker muscular dystrophy.<sup>94</sup>

### 5) Comment

The gene function and the description of overlapping CNV would make this an excellent candidate gene, potentially pathogenic. However, the deletion in the AGP proband only affects the first non-coding exon of the longer isoforms, so it is difficult to know if it is deleterious. Expression studies are necessary to assess the effect on mRNA in this individual. Furthermore, description of other cases with small CNV overlapping *DTNA* or *SNV* are required to implicate this gene specifically. Indeed, given that the majority of the overlapping CNV are very large and contain many genes, it is difficult to ascribe pathogenicity to alterations of a single gene in the interval.

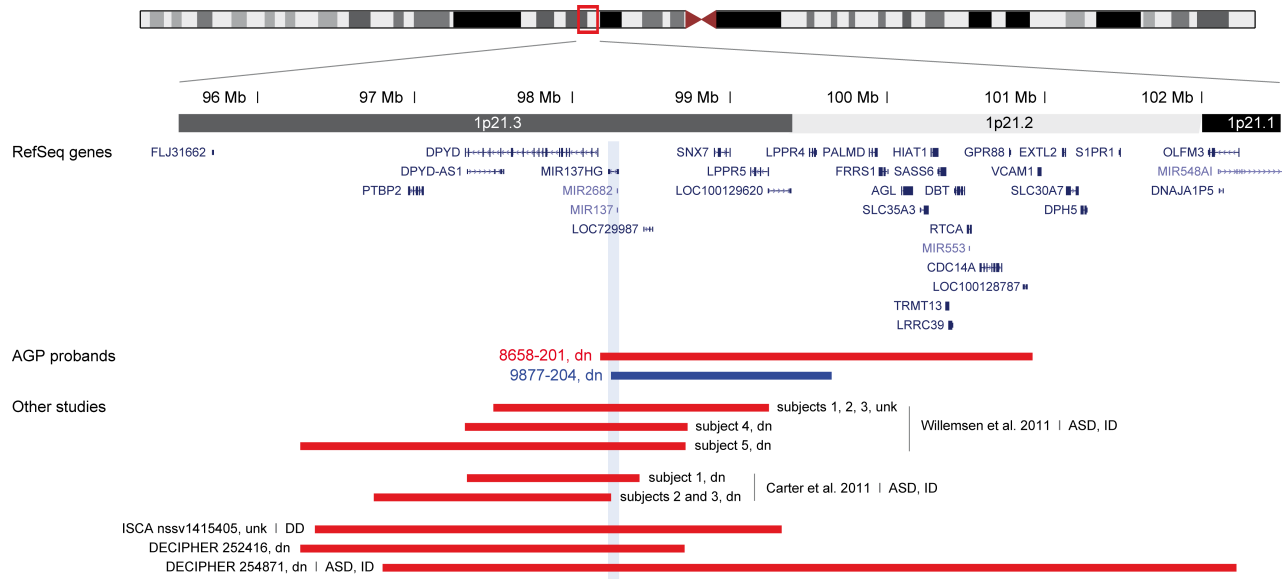

**Figure S15. CNV overlapping *MIR137* (microRNA 137) in chromosome 1p21.3**

Chr1:95,500,000-102,500,000 (hg18). Abbreviations: ASD, autism spectrum disorder; dn, *de novo*; DD, developmental delay; ID, intellectual disability; unk, unknown inheritance

### 1) AGP

- Proband 8658\_201, female, 2.7 Mb 1p21.3-p21.2 deletion containing 22 genes including *MIR137* (chr1:98175622-100923952), *de novo*. Phenotype: autism on ADI and ADOS, comorbid ADHD, no language delay; low average IQ (WASI at 21 y: verbal IQ 78, performance IQ 88, full scale IQ 81); overweight, height and head circumference 50<sup>th</sup> centile, high pain tolerance, no epilepsy.
- Proband 9877\_204, male, 1.4 Mb 1p21.3-p21.2 duplication containing 8 genes including *MIR137* (chr1:98247355-99645560), *de novo*. Phenotype: autism on ADI-R and ADOS, language delay (first words 36 mo, first phrases 60 mo), functional language, mild ID (WISC-R at 11 y: verbal IQ 51, performance IQ 80, full scale IQ 64), normal height and head circumference, weight -1.6 SD, no dysmorphic features, normal physical exam, no epilepsy.

Both CNV in AGP probands also involve the *LPPR4* and *LPPR5* genes (lipid phosphate phosphatase-related proteins, types 4 and 5). *LPPR4* is specifically expressed in neurons and involved in axonal outgrowth during development and regenerative sprouting;<sup>95</sup> no haploinsufficiency score available (no information for *LPPR5*).

- No *MIR137* deletions among 4,768 controls; 1 carries a *MIR137* duplication (chr1:97673140-98319409); no CNV in 4,875 parents.

### 2) Other human genetic evidence

#### CNV:

- Willemssen et al.<sup>96</sup>: Chromosome 1p21.3 microdeletions comprising *DPYD* and *MIR137* associated with ID in 3 sibs and 2 unrelated subjects; the minimal region of overlap includes only *DPYD* and *MIR137*. The individuals displayed decreased expression of both precursor and mature miR-137 levels, as well as increased expression of the downstream targets *MITF*, *EZH2*, and *KLF4*. *DPYD* is involved in autosomal recessive dihydropyrimidine dehydrogenase deficiency; the significance of a defect in only one allele is uncertain.

Subjects 1, 2 and 3: siblings carrying a 1.75 Mb 1p21.3 deletion (chr1:97500000-99250000), inheritance unknown (parents deceased). Subject 1: male, borderline-mild ID (verbal IQ 65, performance IQ 90, full scale IQ 73), features of ASD, tendency to overeat, remarkably shy and friendly behavior, weight 90<sup>th</sup> centile, deep set eyes, broad nasal tip, long ears, thick lower lip, myopia. Subject 2: male, mild-moderate ID (verbal IQ < performance IQ 70, full scale IQ 52), features of ASD, tendency to overeat, self mutilation, aggressive outbursts, remarkably shy and friendly behavior, speech deficits, weight >98<sup>th</sup> centile, broad nasal tip, long ears, macrostomia, thick lower lip, astigmatism. Subject 3: female, mild-moderate ID (no other information available).

Subject 4: male, 1.41 Mb 1p21.3 deletion (chr1:97320000-98730000), *de novo*. Phenotype: mild ID (verbal IQ 59, performance IQ 71, global IQ 62), features of ASD, tendency to overeat, remarkably shy and friendly behavior, speech deficits, weight 98<sup>th</sup> centile, deep set eyes, astigmatism, myopia, broad nasal tip, full cheeks, thick lower lip, micrognathia and long ears.

Subject 5: female, 2.45 Mb 1p21.3 deletion (chr1:96270000-98720000), *de novo*. Phenotype: mild ID (global IQ 66), aggressive outbursts, remarkably shy and friendly behavior, weight >98<sup>th</sup> centile, full cheeks, long ears, thick lower lip.

- Carter et al.<sup>97</sup>: Subject 1: male, 1.1 Mb 1p21.3 deletion (chr1:97332167-98424667), *de novo*. Phenotype: severely delayed language, ID, autism. The individual also carries a balanced translocation t(9;21)(p13.3;q22.1) and has a *PTCHD1* missense mutation. Both abnormalities are inherited from the mother. The translocation was also transmitted to a healthy sister. Subjects 2 and 3: siblings with a 1.5 Mb 1p21.3 deletion (chr1:96742150-98243813), *de novo*. In their mother, the deleted region from chromosome 1p21.3 was inserted into chromosome 10. Subject 2: female, severe language delay, adaptive skills severely delayed, autism. Subject 3: male, language delay, no ID (full scale IQ 99), ASD. Both sibs had mild dysmorphic features, including upslanting palpebral fissures and small joint hypermobility.
- ISCA: Subject nssv1415405, unknown gender, 3 Mb 1p21.3 deletion (chr1:96362589-99332669), inheritance unknown. Phenotype: developmental delay and additional significant developmental and morphological phenotypes referred for genetic testing.
- DECIPHER: Subject 252416, female, 2.4 Mb 1p21.3 deletion (chr1:96274145-98715464), *de novo*. No phenotype information; only CNV reported in the subject.
- DECIPHER: Subject 254871, male, 5.4 Mb 1p21.3-p21.1 deletion (chr1:96792350-102220124), *de novo*. Phenotype: autism, ID, spotty hyperpigmentation, precocious puberty. Only CNV reported in the subject.

### 3) Functional evidence

- The mature microRNA transcript miR-137 regulates neuronal maturation: overexpression of miR-137 inhibits dendritic and spine morphogenesis in newborn cells in the adult hippocampus and in cultured hippocampal neurons, whereas a reduction in miR-137 had opposite effects,<sup>98</sup> miR-137 has also been shown to modulate neurogenesis in adult neural stem cells.<sup>99</sup> Significant enrichment of miR-137 at the synapses of cortical and hippocampal neurons suggests a role in regulating local synaptic protein synthesis machinery.<sup>96</sup>
- Expressed in the brain, enriched in neurons, at the synaptic compartment.

### 4) Other evidence

- An intronic SNP in *MIR137* was strongly associated with schizophrenia in a mega-analysis combining genome-wide association study data from over 40,000 individuals.<sup>100</sup>

### 5) Comment

1p21.3 deletions of variable sizes overlapping *MIR137* reported in 11 individuals with ASD and/or ID. All cases in which inheritance is known originated *de novo*. Interestingly, both overexpression and inhibition of miR-137 had significant but opposite effects on dendritic development of hippocampal neurons, suggesting that the *MIR137* gene may be dosage sensitive, and that both the deletion and duplication observed in AGP probands could interfere with neuronal maturation.

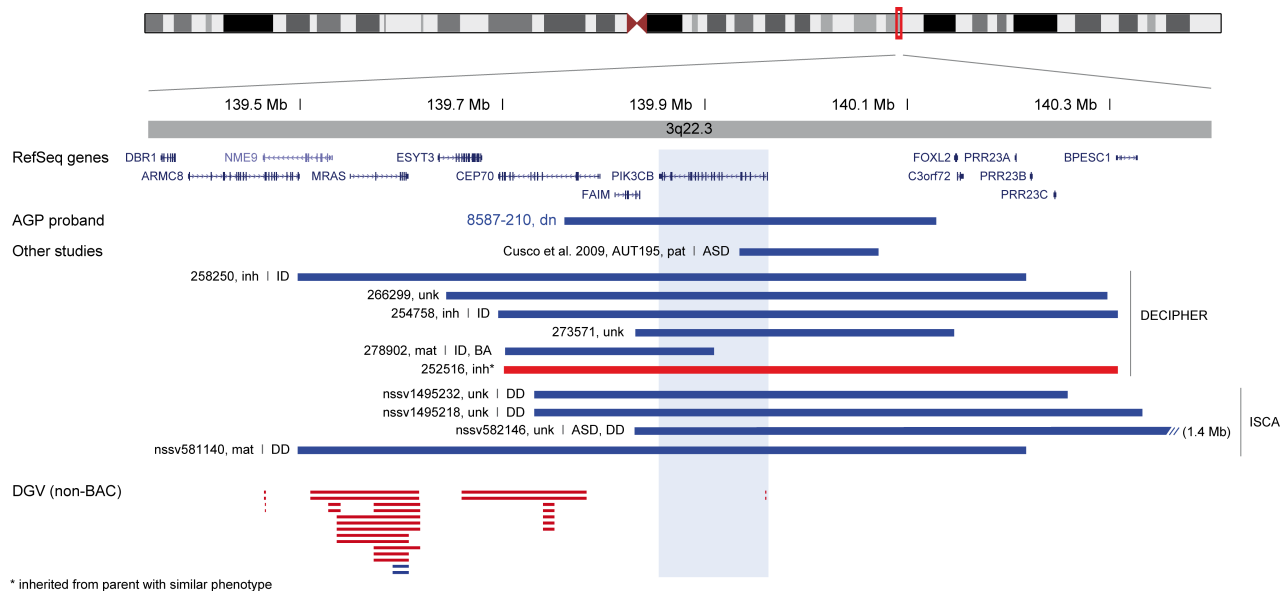

**Figure S16. CNV identified in *PIK3CB* (phosphatidylinositol-4,5-bisphosphate 3-kinase, catalytic subunit beta) in chromosome 3q22.3**

Chr3:139,350,000-140,400,000 (hg18). Abbreviations: ASD, autism spectrum disorder; BA, behavioral/psychiatric abnormality; dn, *de novo*; DD, developmental delay; inh, inherited; ID, intellectual disability; mat, maternal; pat, paternal; unk, unknown inheritance

### 1) AGP

- Proband 8587\_210, female, 366 kb duplication involving *PIK3CB*, *CEP70* and *FAIM* (chr3:139760896-140127703), *de novo*. The entire *PIK3CB* gene is duplicated, which could result in increased expression, leading to excessive phosphatidylinositol 3-kinase (PI3K) activity. Phenotype: autism (ADI-R and ADOS positive), no language delay (first words 10 mo, first phrases 12 mo), verbal, WISC-III at 13 y 9 mo: verbal IQ 92, performance IQ 78, full scale IQ 84.
- No deletions or duplications of *PIK3CB* among 4,768 controls and 4,875 parents.

### 2) Other human genetic evidence

#### CNV:

- Cusco et al.<sup>101</sup>: Subject AUT195, male, 3q22.3 *PIK3CB* partial duplication (chr3:139934042-140070771), paternal. Phenotype: autism, mild ID, unilateral sensorineural deafness, no dysmorphism, no seizures. The functional consequences of a partial duplication are unknown.
- DECIPHER: Subject 258250, female, 720 kb 3q22.3 duplication involving *PIK3CB* (chr3:139497567-140217021), inherited from normal parent. Phenotype: cognitive impairment, Dandy-Walker malformation. Only CNV reported in the subject.
- DECIPHER: Subject 266299, male, 650 kb 3q22.3 duplication involving *PIK3CB* (chr3:139644292-140297350), inheritance unknown. Phenotype: microtia. This individual carries another duplication (chr3:160280710-160878458), inheritance unknown.
- DECIPHER: Subject 254758, male, 610 kb 3q22.3 duplication involving *PIK3CB* (chr3:139695765-140307747), inherited from normal parent. Phenotype: ID, short attention span, microcephaly, long face, high anterior hairline, downslanted palpebral fissures, depressed nasal tip, prominent nasal bridge, macrotia, micrognathia, abnormality of the pinna, prominent ears, slender build, scoliosis, mitral regurgitation, atrial septum defect, cryptorchidism, large hands. Only CNV reported in the subject.
- DECIPHER: Subject 273571, male, 315 kb 3q22.3 duplication involving *PIK3CB* (chr3:139830639-140145866), inheritance unknown. No phenotype information; only CNV reported in the subject.
- DECIPHER: Subject 252516, female, 606 kb 3q22.3 deletion involving *PIK3CB* (chr3:139701603-140307606), inherited from parent with similar phenotype. No phenotype information; only CNV reported in the subject.
- DECIPHER: Subject 278902, female, 207 kb 3q22.3 duplication involving *PIK3CB* (chr3:139701603-139908842), maternal. Phenotype: moderate ID and behavioral/psychiatric abnormality. The phenotype of the mother is unknown. Only CNV reported in the subject.

- ISCA: Subject nssv1495232, unknown gender, 527 kb 3q22.3 duplication involving *PIK3CB* (chr3:139730880-140257978), inheritance unknown. Phenotype: developmental delay and additional significant developmental and morphological phenotypes referred for genetic testing.
- ISCA: Subject nssv1495218, unknown gender, 600 kb 3q22.3 duplication involving *PIK3CB* (chr3:139730880-140331637), inheritance unknown. Phenotype: developmental delay and additional significant developmental and morphological phenotypes referred for genetic testing.
- ISCA: Subject nssv582146, unknown gender, 1.4 Mb 3q22.3-q23 duplication involving *PIK3CB* (chr3:139830647-141256588), inheritance unknown. Phenotype: autism, developmental delay and additional significant developmental and morphological phenotypes referred for genetic testing.
- ISCA: Subject nssv581140, unknown gender, 719 kb 3q22.3 duplication involving *PIK3CB* (chr3:139497567-140217080), maternal. Phenotype: developmental delay and additional significant developmental and morphological phenotypes referred for genetic testing.

### 3) Functional evidence

- *PIK3CB* encodes an isoform of the catalytic subunit PI3Kbeta of phosphoinositide 3-kinase (PI3K). These signaling molecules activate a wide range of downstream targets that regulate multiple cellular processes, including intracellular trafficking of proteins, cell proliferation, migration and survival.
- Expressed in the brain.

### 4) Other evidence

- % HI = 0.5 (highly likely to be haploinsufficient)
- PI3K is regulated by the fragile X mental retardation protein (FMRP),<sup>10</sup> and is elevated in fragile X syndrome Fmr1-knockout mice,<sup>102,103</sup> suggesting that dysregulated PI3K signaling may underlie the synaptic impairments in fragile X syndrome. Accordingly, PI3K antagonists rescue fragile X syndrome phenotypes, including dysregulated synaptic protein synthesis, excess AMPA receptor internalization, and increased spine density.<sup>102</sup>

### 5) Comment

The only report identified in the literature is a partial *PIK3CB* duplication in a subject with ASD, paternal;<sup>101</sup> the functional consequences of a partial duplication are difficult to predict. Eight cases of whole *PIK3CB* duplication are described in DECIPHER and ISCA, 4 are inherited and for the other 4 the inheritance is unknown. Thus, the duplication of *PIK3CB* identified in the AGP proband 8587-210 is the only one *de novo*. No similar duplications overlapping this gene were found among AGP controls, parents or population controls in DGV. Taken together these findings suggest that *PIK3CB* duplications could represent a risk factor for ASD/ID, associated with incomplete penetrance and/or variable expressivity. Further studies in larger samples of cases and controls are necessary to confirm this hypothesis.

## Examples of candidate genes affected by inherited CNV in AGP probands

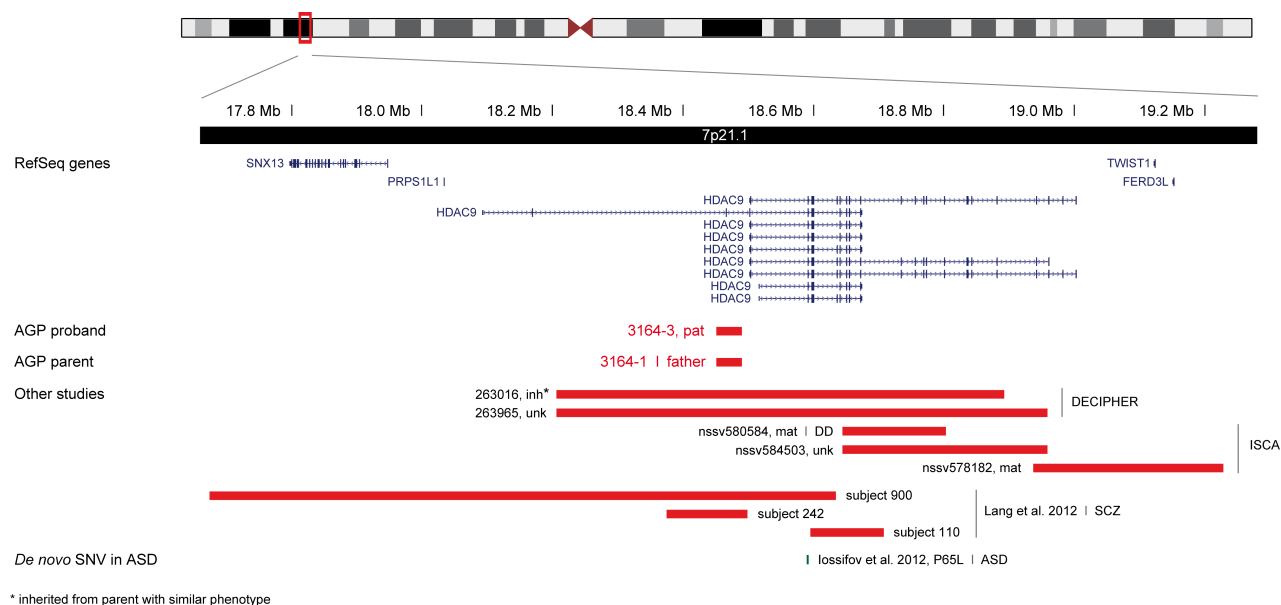

### Figure S17. CNV and SNV identified in *HDAC9* (histone deacetylase 9) in chromosome 7p21.1

Chr7:17,660,000-19,280,000 (hg18). Abbreviations: ASD, autism spectrum disorder; dn, *de novo*; DD, developmental delay; inh, inherited; mat, maternal; pat, paternal; SCZ, schizophrenia; unk, unknown inheritance

#### 1) AGP

- Proband 3164\_3, male, rare 40 kb deletion involving only *HDAC9* (chr7:18450792-18490822), paternal. Phenotype: autism (ADI-R and ADOS positive), language delay (first words 54 mo, first sentences 60 mo), verbal, mild ID (PPVT-III at 6 y 10 m: verbal IQ 67); multiplex family, affected sibling not yet tested. Phenotype information about father not available.
- No *HDAC9* exonic deletions among 4,768 controls and 4,874 parents (1 deletion in the father of proband 3164-003).

#### 2) Other human genetic evidence

##### CNV:

- DECIPHER: Subject 263016, female, *HDAC9* deletion (chr7:18206711-18892382), inherited from parent with similar phenotype. No phenotype information; only CNV reported in the subject.
- DECIPHER: Subject 263965, female, *HDAC9* deletion (chr7:18206712-18958442), inheritance unknown. No phenotype information; only CNV reported in the subject.
- ISCA: Subject nssv580584, unknown gender, *HDAC9* deletion (chr7:18644447-18803445), maternal. Phenotype: global developmental delay, seizures.
- ISCA: Subject nssv584503, unknown gender, *HDAC9* deletion (chr7:18644447-18958471), inheritance unknown. Phenotype: abnormal facial shape, facial asymmetry.
- ISCA: Subject nssv578182, unknown gender, 7p21.1 deletion of 3 genes: *HDAC9*, *TWIST1* and *FERD3L* (chr7:18937678-19227544), maternal. Phenotype: craniosynostosis (defects in *TWIST1* cause autosomal dominant craniosynostosis type 1).
- Lang et al.<sup>104</sup>: Three schizophrenia individuals with exonic *HDAC9* deletions among 3391 cases (inheritance unknown); no *HDAC9* deletion in 3181 controls.

##### SNV:

- lossifov et al.<sup>4</sup> (exome sequencing in ASD): Subject 13076, male, *HDAC9* missense variant, *de novo*. The variant appears to be damaging (PolyPhen2, SIFT, PANTHER), affecting a highly conserved residue (GERP 5.93, ConSurf 9/9). Phenotype: ASD (no other information provided).

#### 3) Functional evidence

- *HDAC9* encodes a histone deacetylase, expressed in the brain. Histones play a critical role in transcriptional regulation, cell cycle progression, and development.
- Expressed in the brain.



#### 4) Other evidence

- % HI = 2.9 (highly likely to be haploinsufficient)
- The *HDAC* family of genes has already been involved in ASD/ID through *HDAC4* (involved in brachydactyly-mental retardation syndrome) and *HDAC8* (X-linked ID, mutations are responsible for Cornelia de Lange syndrome).

#### 5) Comment

In addition to the *HDAC9* paternal deletion identified in AGP proband 3164-003, we identified 5 other overlapping deletions in subjects in DECIPHER and ISCA, as well as three deletions in schizophrenia. The deletion was inherited in 3 subjects; no information was available for the others. No *HDAC9* exonic deletions were observed among the AGP 4,768 controls and 4,874 parents; in addition, no deletions overlapping this gene were found in DGV. Taken together these findings suggest that *HDAC9* deletions could represent a risk factor for ASD, ID and schizophrenia, associated with incomplete penetrance/variable expressivity. Further studies in larger samples of cases and controls are necessary to confirm this hypothesis.

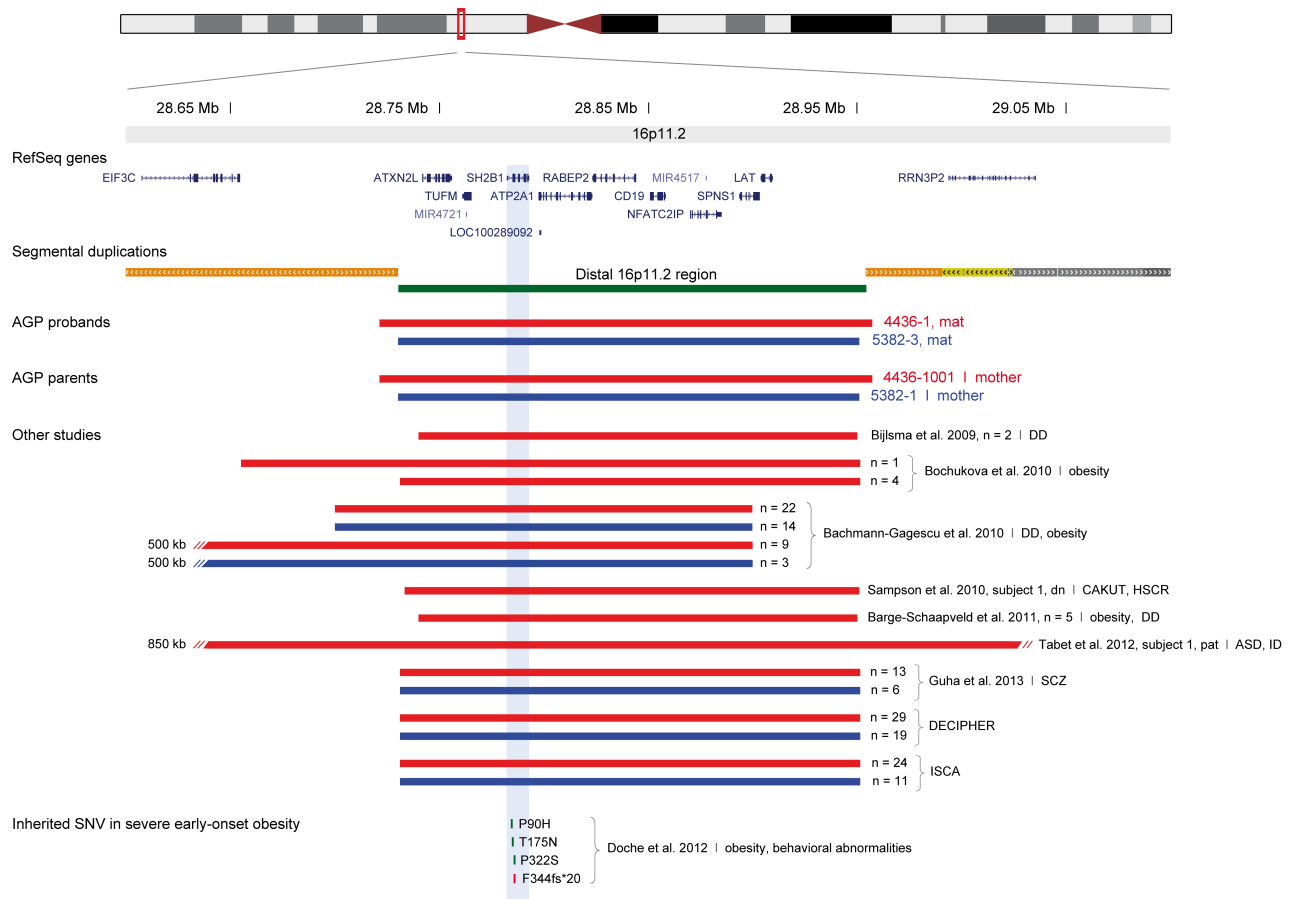

**Figure S18. CNV identified in the distal 16p11.2 region containing *SH2B1* (SH2B adaptor protein 1)**

Chr16:28,600,000-29,100,000 (hg18). Abbreviations: ASD, autism spectrum disorder; CAKUT, congenital anomalies of the kidney and urinary tract; DD, developmental delay; HSCR, Hirschsprung disease; ID, intellectual disability; mat, maternal; pat, paternal; SCZ, schizophrenia.

Longer CNV encompassing the distal 16p11.2 region and the proximal 16p11.2 region (29.5-30.1 Mb) involved in ASD, ID, and regulation of body mass index are not shown here.

#### 1) AGP

- Proband 4436\_1, male, distal 16p11.2 deletion including *SH2B1* (chr16:28721599-28957155), maternal. Phenotype: ASD diagnosis, no language delay (first words and phrases 15 mo), verbal, WISC-IV at 8 y 8 mo: verbal IQ 95, performance IQ 67, full scale IQ 76. Sporadic case.

- Proband 5382\_3, male, distal 16p11.2 duplication including *SH2B1* (chr16:28730274-28950951), maternal. Phenotype: autism (ADI-R and ADOS positive), language delay (first words 42 mo, first phrases 48 mo), verbal; PPVT-IV verbal IQ 82, Leiter-R Brief performance IQ 97 (both at 11 y 10 m). Sporadic case.
- 1 distal 16p11.2 deletion among 4,768 controls and 1 deletion among 4,875 parents; no reciprocal duplications in controls or parents (the mother of proband 5382\_3 was excluded from the microarray analyses after quality checks, her duplication was identified during qPCR validation of the CNV in her son).

## 2) Other human genetic evidence

### CNV:

- Deletions at distal 16p11.2, with a minimal common region of 220 kb (28.73–28.95 Mb), have been implicated in early-onset obesity and developmental delay,<sup>105-108</sup> and in other variable phenotypes, including behavioral problems such as ASD and ADHD, anomalies of the kidney and urinary tract and Hirschsprung disease.<sup>109,110</sup> Whereas deletions appeared to be significantly enriched in populations with early-onset obesity or with developmental delay,<sup>105,108</sup> reciprocal duplications were not enriched in cases compared to controls.<sup>105</sup>
- A recent meta-analysis in large clinical cohorts with developmental delay, ID, ASD and congenital malformations referred for genetic testing found deletions at distal 16p11.2 in 23 of 31516 cases and in 2 of 13696 controls (OR 5,  $P = 0.01$ ).<sup>111</sup> Reciprocal duplications were found in 25 of 31516 cases and in 3 of 13696 controls (OR 3.62,  $P = 0.02$ ). Analysis of three ASD cohorts (AGP, SSC, and AGRE;  $n = 3955$ ) found 1 deletion (OR 1.73,  $P = 0.53$ ) and 1 duplication (OR 1.15,  $P = 1$ ). The lack of a significant effect of these CNV in ASD was suggested to be due to the relatively small sample size.<sup>111</sup>
- Tabet et al.<sup>110</sup>: Male, 847 kb 16p11.2 distal deletion containing *SH2B1* (chr16:28401454-29249055), paternal. Autism, severely delayed speech, childhood-onset obesity, IQ 47. At age 19, he was tall (+2.5 SD), with truncular obesity (+4 SD). The father was described as being non talkative, introverted and having few social relationships.
- Guha et al.<sup>112</sup>: Deletions at distal 16p11.2 were reported in schizophrenia, in 13 of 13850 cases (0.094%) and 3 of 19954 controls (0.015%) (OR 6.25 [95% CI, 1.78-21.93];  $P = 0.001$ ). The rate of duplications in the region was not significantly different between cases and controls: 6 of 13850 cases (0.043%) vs 13 of 19954 controls (0.065%).

### SNV:

- Doche et al.<sup>113</sup>: The minimal deleted interval contains nine genes, including *SH2B1*, which plays a role in the regulation of body weight and glucose metabolism in mice (see below). Mutation screening of *SH2B1* in 300 individuals with severe early-onset obesity revealed five mutations, one frameshift and three missense (including one found in two subjects). Mutation carriers exhibited childhood-onset obesity, hyperphagia, insulin resistance and short stature as adults. Neurobehavioral phenotypes included social isolation, speech and language delay and aggression. All mutations were inherited from overweight/obese parents reported to also have variable behavioral abnormalities. The mutations were absent from 500 controls.

## 3) Functional evidence

- *SH2B1* encodes an adaptor protein that binds to a large range of receptor tyrosine kinases and is thus involved in multiple biological pathways, including leptin and insulin signaling. The widely expressed scaffold protein SH2B1 binds to the receptors for nerve growth factor, insulin and insulin-growth factor 1, and has been implicated in neuronal differentiation and neurite outgrowth.<sup>114,115</sup>
- Expressed in the brain.
- *Sh2b1* deficient mice develop obesity and diabetes, a phenotype rescued by neuron-specific expression of *SH2B1*.<sup>116</sup>

## 4) Other evidence

- % HI = 18.7 (likely to be haploinsufficient)

## 5) Comment

*SH2B1* haploinsufficiency is clearly implicated in early-onset obesity. Recent evidence suggests that distal 16p11.2 deletions could also be involved in neurodevelopmental phenotypes, associated with incomplete penetrance and variable expressivity. Although a significant enrichment has been reported in samples with developmental delay/ID, the risk effect appears to be weak compared to other recurrent CNV.<sup>111</sup> The implication of deletions at distal 16p11.2 in schizophrenia<sup>112</sup> and the description of maladaptive behaviors in individuals carrying *SH2B1* mutations,<sup>113</sup> lend further support to their role as risk factors. The involvement of distal 16p11.2 duplications in ID and ASD is difficult to assess at present, since they have not been found to be consistently enriched in cases. Further studies, comparing the frequency of distal 16p11.2 deletions and duplications in larger samples of cases and controls, are needed to clarify the impact of these CNV in neurodevelopmental disorders.

## SUPPLEMENTAL TABLES

**Table S1A. Autism strict and spectrum classifications**

| ASD diagnostic category | Phenotype classifications |        |
|-------------------------|---------------------------|--------|
|                         | ADI-R                     | ADOS   |
| Strict                  | Autism                    | Autism |
|                         | Autism                    | NA     |
| Spectrum                | Autism                    | ASD    |
|                         | ASD                       | Autism |
|                         | NA                        | Autism |

NA, not available or not administered

**Table S1B. Quality control – Family and control sample breakdown**

| Quality control filters                               | Initial     | Filter 1<br>Low call<br>rate | Filter 2<br>Mendelian<br>errors | Filter 3<br>Gender-<br>mismatch | Filter 4<br>Duplicates | Filter 5<br>High LRR/<br>BAF SD | Filter 6<br>Excess<br>calls | Filter 7<br>Excess <i>de<br/>novos</i> | Filter 8<br>Peri-<br>centrom. | Filter 9<br>Large<br>chrom.<br>abnorm. | Filter 10<br>Incomplete<br>phenotype<br>data | Filter 11<br>All<br>ancestries | Filter 12<br>European-<br>only |
|-------------------------------------------------------|-------------|------------------------------|---------------------------------|---------------------------------|------------------------|---------------------------------|-----------------------------|----------------------------------------|-------------------------------|----------------------------------------|----------------------------------------------|--------------------------------|--------------------------------|
| # Single probands                                     | 51          | 56                           | 55                              | 55                              | 55                     | 90                              | 106                         | 106                                    | 106                           | 106                                    | 106                                          | 106                            | 102                            |
| # Proband + mother duo                                | 10          | 30                           | 30                              | 30                              | 30                     | 100                             | 125                         | 125                                    | 125                           | 131                                    | 126                                          | 126                            | 106                            |
| # Proband + father duo                                | 12          | 31                           | 31                              | 31                              | 31                     | 113                             | 127                         | 127                                    | 127                           | 142                                    | 137                                          | 137                            | 119                            |
| # Complete trios*                                     | 2772        | 2677                         | 2620                            | 2613                            | 2606                   | 2268                            | 2161                        | 2158                                   | 2155                          | 2126                                   | 2077                                         | 2077*                          | 1820                           |
| <b>Total # families</b>                               | <b>2845</b> | <b>2794</b>                  | <b>2736</b>                     | <b>2729</b>                     | <b>2722</b>            | <b>2571</b>                     | <b>2519</b>                 | <b>2516</b>                            | <b>2513</b>                   | <b>2505</b>                            | <b>2446</b>                                  | <b>2446</b>                    | <b>2147</b>                    |
| # Father + mother only<br>(with or without relatives) | 258         | 277                          | 273                             | 273                             | 273                    | 309                             | 324                         | 324                                    | 326                           | 332                                    | 380                                          | 199                            | 196                            |
| # Fathers only                                        | 12          | 21                           | 22                              | 22                              | 22                     | 60                              | 69                          | 69                                     | 69                            | 68                                     | 73                                           | 28                             | 28                             |
| # Mothers only                                        | 16          | 27                           | 27                              | 27                              | 27                     | 52                              | 60                          | 60                                     | 61                            | 62                                     | 67                                           | 32                             | 32                             |
| # Relatives only                                      | 0           | 0                            | 0                               | 0                               | 0                      | 0                               | 0                           | 0                                      | 0                             | 0                                      | 0                                            | 4                              | 4                              |
| # Technical controls                                  | 9           | 9                            | 9                               | 8                               | 8                      | 8                               | 8                           | 8                                      | 8                             | 8                                      | 8                                            | 8                              | 8                              |
| <b>Control datasets</b>                               |             |                              |                                 |                                 |                        |                                 |                             |                                        |                               |                                        |                                              |                                |                                |
| <b>SAGE (dbGaP)<sup>a</sup></b>                       | 1847        | 1847                         | –                               | 1847                            | 1829                   | 1815                            | 1793                        | –                                      | 1792                          | 1769                                   | –                                            | 1769                           | 1166 <sup>#</sup>              |
| <b>OC (European-only)<sup>b#</sup></b>                | 511         | 509                          | –                               | 509                             | 501                    | 475                             | 440                         | –                                      | 437                           | 433                                    | –                                            | 433                            | 234 <sup>#</sup>               |
| <b>HABC (dbGaP)<sup>c</sup></b>                       | 2860        | 2860                         | –                               | 2857                            | 2809                   | 2658                            | 2571                        | –                                      | 2570                          | 2566                                   | –                                            | 2566                           | 1240                           |

**CNV detection and quality control evaluation:** For samples that passed the SNP and intensity QC, genome-wide CNVs were detected using a multiple-algorithm approach to maximize sensitivity and specificity of CNV calling. For a detailed description see the Supplemental information of Pinto et al.<sup>117</sup> Briefly, CNVs were identified by using QuantiSNP,<sup>118</sup> iPattern,<sup>119</sup> and PennCNV;<sup>120</sup> the family-based CNV detection option of PennCNV was used to confirm inheritance.

We excluded CNVs when they failed stringent QC criteria: <5 probes and low confidence score (QuantiSNP log Bayes factor <15); if CNVs resided in regions of extreme GC content (>70%); or if they were within centromere proximal cytobands. CNVs detected by QuantiSNP and iPattern in one individual with a minimum of 5 consecutive probes covering at least 5 kb of sequence were merged using outer probe boundaries (i.e., union of the CNVs). All CNVs by any algorithm with size larger than 1 Mb were inspected manually, and all samples that passed all above QC filters were inspected for the presence of large abnormalities in chromosomes X and Y (that is, in addition to the algorithm calling). As a final step, we joined CNVs that appeared to be artificially split by either of the calling algorithms and also removed CNVs that spanned known large assembly gaps in hg18 (greater than 200 kb).

**Filter descriptions:** A total of 9,050 individuals from 2,845 ASD families were genotyped as part of Stages 1<sup>(117)</sup> and 2 and those passing QC filters were used in the rare CNV analysis. Incomplete families, where proband-father/mother duos passed QC filters were also analysed for CNVs. The number and the composition of families remaining after each filtering step is indicated. Counts may increase or decrease after each step, as removal of individuals in some instances will break complete trios into proband+parent duos or single probands. **Filter 1:** Low call rate or high missingness. **Filter 2:** High Mendelian error rate (with or without proband gender mismatch); families with unresolved gender mismatches were excluded; families where both parents had a gender mismatch without high Mendelian error rate were kept and the parents' gender swapped. Families with high Mendelian error rate for one parent only were excluded. **Filter 3:** Proband with gender mismatch but no Mendelian error (i.e., another sib of the same family was genotyped instead) resulted in exclusion of the whole family. Technical controls with gender mismatches were excluded. **Filter 4:** Any duplicate samples/families had one sample/family excluded. **Filter 5:** Samples with high standard deviation (SD) of log R ratio of intensities (LRR) and/or B allele frequency (BAF), or showing extreme/wide intensities. **Filter 6:** Samples with excess of CNV calls by at least one of the algorithms, except those with fragmented calls due to large chromosome abnormalities. **Filter 7:** Samples with excess of *de novos* (which were confirmed to be false positives with experimental validation). **Filter 8:** Lack of CNV calls after three filters (removing pericentromeric calls, <30 kb size, 50% overlap with segmental duplication

blocks). **Filter 9:** Large chromosomal abnormalities >7.5 Mb. A list of chromosome abnormalities detected in probands can be found in **Table S1C**, and for parents and controls in **Table S17B**. Subjects were removed if one or more CNVs were found to be cell-line artifacts after experimental validation. If a parent failed QC at this step, his/her family was not excluded. **Filter 10:** No phenotype data in database or proband did not meet full criteria for ASD. **Filter 11:** Parents that passed QC but are parents of probands that failed QC. **Filter 12:** European ancestry only.

**Ancestry:** Ancestry for each of the four samples (AGP cases, and SAGE, HABC, and OC controls) was inferred by eigenvector decomposition and clustering. To identify European subjects from the Ontario controls, we used the multidimensional scaling (MDS) function of PLINK to cluster the OC subjects with HapMap-CEU. The remaining three samples had been described and analyzed for ancestry in previous studies.<sup>117,121,122</sup> We used the results from those published studies to identify subjects of inferred European ancestry for this study. In each of the published studies, ancestry was inferred by using SpectralGem<sup>123</sup> to analyze thousands of high quality SNPs genotyped for all subjects. After the clustering step from SpectralGem, it was simple to identify groups of European ancestry because a substantial fraction of the contributing AGP sites were European.

Data from 2,446 families passed all QC steps (13% of subjects excluded), adding 1,359 new families to the combined analysis. Of the new families, 1,168 families were European and 191 were of other ancestries. As described in detail in Pinto et al.<sup>117</sup>, to avoid confounding by ancestry, all downstream CNV analyses used European-only cases (n=2,147) and controls (n=2,640). For the analyses presented in **Figure S1**, we extended the number of controls to include 1,843 subjects from other ancestries —517 SAGE and 1,326 HABC non-Europeans controls that passed QC— giving a total of 4,768 control subjects (2,022 males and 2,746 females) from all ancestries to be compared to ASD cases of all ancestries.

\* *de novo* CNVs were detected and confirmed in a total of 2077 complete trios passing array QC plus 19 families in which at least one of the parents failed initial array QC but additional experimental validation in both parents confirmed the presence of *de novo* CNVs, giving a total of 2096 complete trios of all ancestries (1838 European trios = 1820 + 18) studied.

<sup>a</sup> **Study of Addiction: Genetics and Environment (SAGE) cohort:** Both raw intensities and genotypes were obtained from 1,847 SAGE control subjects from NHGRI-dbGaP (accession: phs000092.v1.p1) as part of the larger SAGE case-control study<sup>124</sup>. The consented sample included 31% males and 69% females, with a mean age of 39.2 y (SD 9.1); 73% of subjects self-identified as European-American, 26% as African-American and 1% as other ([http://zork.wustl.edu/gei/study\\_description.html](http://zork.wustl.edu/gei/study_description.html)). Subjects may have had exposure to alcohol (and possibly to other drugs), but did not meet criteria for alcohol or other drug dependence. The subset of control dataset used in the specific CNV analyses in this paper is composed of 1,166 unrelated European control samples that passed all quality control filters (75% had DNA extracted from whole blood and 25% from cell lines), composed of 370 males and 796 females.

<sup>b</sup> **Ontario Colorectal Cancer case-control study cohort (OC):** 433 unrelated European control subjects from the population-based Colorectal Cancer case-control study, recruited randomly from the province of Ontario in Canada (Ontario Familial Colorectal Cancer Registry, OFCCR) as described elsewhere<sup>125</sup> and genotyped with the Illumina 1M single array.<sup>126</sup> The OC control sample consisted of 199 females and 234 males with mean age of 61.8 y (range: 27-78); all subjects were self-identified as non-Hispanic whites and estimated to be of European ancestry from their genotypes. All DNA samples were extracted from whole blood. The GenomeStudio v. 2010.3, with the clustering algorithm GenTrain2 and a GenCall cutoff of 0.15 was used to generate genotypes. The same quality control procedures applied to the ASD family samples and SAGE controls were used here. For the main CNV analysis, we used only the 234 OC males.

<sup>c</sup> **HealthABC (HABC):** 1,240 unrelated European control subjects from the whole-genome-association study of visceral adiposity in the Health, Aging, and Body Composition (HealthABC or HABC)<sup>127</sup> were used in the main analyses. The HABC cohort studied the factors that contribute to disability and the decline in function of healthier older persons, with a particular emphasis on changes in body composition. The HealthABC study recruited 3,075 70-79 year-old community-dwelling adults (41% African-American, remainder were white-European), who were initially free of mobility and activities of daily living disability. Genotyping was performed by the Center for Inherited Disease Research (CIDR) using the Illumina Human1Mv3 (duo) BeadChip system like most of the AGP data, providing excellent comparability with the case dataset. Both raw intensities and genotypes were obtained from JAAMH-dbGaP (accession: phs000169.v1.p1) for 2,860 samples, resulting in 1,240 European (637 males and 603 females) and 1,326 non-European samples after QC. Samples were excluded from the dataset in case of sample failure, genotypic sex mismatch, or first-degree relative of an included individual based on genotype data.

<sup>#</sup> To try to balance the number of male and female controls used in the various analyses (by stage and by platform), we only included male samples from the OC dataset (n=234), and excluded 86 female SAGE samples of European ancestry (i.e., all males [n=370] and 796 females were included).

Abbreviations: chrom. abnorm., chromosomal abnormalities; pericentrom., pericentromeric; M, males.

## Table S1C. Quality control – Chromosome abnormalities detected in probands

(Chromosome abnormalities in parents and controls are listed in Table S17B)

| Stage                                                                                   | Sample ID  | Sex | Family type | DNA source                      | Cytoband                     | Anomaly type                                                                 | Karyotype                                         | Comment                                                                                                                                                                                                                                                                                                                      |
|-----------------------------------------------------------------------------------------|------------|-----|-------------|---------------------------------|------------------------------|------------------------------------------------------------------------------|---------------------------------------------------|------------------------------------------------------------------------------------------------------------------------------------------------------------------------------------------------------------------------------------------------------------------------------------------------------------------------------|
| <b>Confirmed chromosomal abnormalities</b>                                              |            |     |             |                                 |                              |                                                                              |                                                   |                                                                                                                                                                                                                                                                                                                              |
| 1                                                                                       | 5467_3     | M   | SPX         | Blood                           | 1q42.3-q44                   | High intensity, BAF split                                                    | N/A                                               | 13.7 Mb 1q42-q44 duplication (1:233476547-247165725), <i>de novo</i> ; confirmed by qPCR                                                                                                                                                                                                                                     |
| 1                                                                                       | 14270_3930 | F   | SPX         | Blood                           | 6q25.3-q27                   | High intensity, BAF split                                                    | 46,XX,ish der(22)t(6;22)(6q25.3;p11.2)pat(6qtel+) | 10 Mb 6q25.3-q27 duplication (6:160773919-170761395); confirmed by FISH, resulting from a balanced translocation in the father                                                                                                                                                                                               |
| 1                                                                                       | 13137_1543 | F   | UNK         | Blood                           | 8p12-8q12.1                  | 8p-q duplication                                                             | 47,XX,+r[10]/46,XX[70]                            | 27 Mb 8p12-8q12.1 duplication (8:31928590-58996070); karyotype: mosaic supernumerary ring chromosome                                                                                                                                                                                                                         |
| 1                                                                                       | 5420_3     | M   | UNK         | CL                              | Whole chr 21                 | High chr 21 intensity, BAF split                                             | 47,XY+21                                          | Down syndrome, confirmed by karyotype                                                                                                                                                                                                                                                                                        |
| 1                                                                                       | 5266_4     | F   | UNK         | Blood                           | Whole chr 2                  | Run of homozygosity entire chr 2                                             | N/A                                               | <i>De novo</i> uniparental disomy chr 2, confirmed in blood DNA                                                                                                                                                                                                                                                              |
| 2                                                                                       | 21020_1    | M   | SPX         | CL (array), blood (qPCR & FISH) | 4p16                         | 4p16.3p16.1 DUP                                                              | 46,XY, der(8)t(4;8)(4p16.1→ter; 8p23.1→ter)       | <i>De novo</i> unbalanced translocation t(4p16;8p23) leading to 4p16.3p16.1 duplication (4:53403-9016339) and 8p23.3p23.1 deletion; maternal origin by microsatellite markers. Normal karyotype, translocation validated by FISH and qPCR; the 4p terminal duplication (8.9 Mb) includes the Wolf-Hirschhorn syndrome region |
| 2                                                                                       | 21020_1    | M   | SPX         | (see above)                     | 8p23                         | 8p23.3p23.1 DEL                                                              | (see above)                                       | <i>De novo</i> unbalanced translocation t(4p16;8p23) (see above). The 6.8 Mb 8p23.3p23.1 terminal deletion (8:154984-6994825) overlaps numerous deletions described in individuals with ID                                                                                                                                   |
| 2                                                                                       | 2175_1     | M   | SPX         | Blood                           | 22q13.2-qter                 | 22q13.2-qter BAF split (no visible LRR deflection)                           | N/A                                               | <i>De novo</i> 10 Mb 22q13.2-qter uniparental disomy (22:39729380-49582267), mosaicism in approximately 24% of cells; normal MLPA                                                                                                                                                                                            |
| 2                                                                                       | 4316_1     | F   | UNK         | Blood                           | Whole chr X                  | Whole chr BAF split (no visible LRR deflection)                              | N/A                                               | Triple X syndrome, <i>de novo</i> , mosaic                                                                                                                                                                                                                                                                                   |
| 1                                                                                       | 5257_3     | M   | SPX         | Blood                           | Whole chr Y                  | Male, high chr Y intensity                                                   | 47,XXY                                            | XXY syndrome, <i>de novo</i> , confirmed by karyotype                                                                                                                                                                                                                                                                        |
| 1                                                                                       | 5515_3     | M   | SPX         | Blood                           | Whole chr Y                  | Male, high chr Y intensity                                                   | 47,XXY                                            | XXY syndrome, <i>de novo</i> , confirmed by karyotype                                                                                                                                                                                                                                                                        |
| <b>Other abnormalities resulting from cell line artifacts or not validated in blood</b> |            |     |             |                                 |                              |                                                                              |                                                   |                                                                                                                                                                                                                                                                                                                              |
| 1                                                                                       | 5010_3     | M   | MPX         | CL                              | 1q43-qter DEL, 9q13-qter DUP | 1q43-q44 low intensity & BAF split; 9q arm high intensity & little BAF split | 47,XY                                             | 1q43-qter 9.4 Mb DEL, mosaic (1:237816283-247249719), 9q13-qter 69.8 Mb DUP, mosaic (9:70400178-140273252); found in the same DNA batch by Affy 500K-EA; normal karyotype; parents normal; AffyCytoScanHD on blood DNA showed normal results: cell line artifact                                                             |
| 1                                                                                       | 5321_3     | M   | SPX         | CL                              | Whole chr 4                  | Run of homozygosity entire chr 4                                             | N/A                                               | Uniparental disomy chr 4, confirmed in cell line; no blood DNA available so we can't exclude a cell line artifact                                                                                                                                                                                                            |
| 1                                                                                       | 6379_4     | M   | SPX         | CL                              | Whole chr 14                 | High intensity, BAF split                                                    | 46,XY                                             | Whole chr 14 duplication by one algorithm only; karyotype excluded a chr14 trisomy: cell line artifact                                                                                                                                                                                                                       |

Samples that passed QC filters but showed CNVs by any algorithm larger than 7.5 Mb, long runs of homozygosity, or CNVs encompassing/or close to the centromere on any of the autosomes or chromosome X were further inspected manually by plotting their log2 ratio intensities as well as allelic genotype ratios. A cutoff of >7.5 Mb was selected to be consistent with large cytogenetically visible chromosome abnormalities. Samples containing such alterations were excluded from the main burden analyses, except for two AGP probands with XYY syndrome that were retained since chromosome Y markers were not used in the CNV analysis, and two probands with uniparental disomy (proband 2175\_1 with a segmental uniparental disomy of chr 22q was excluded during QC because of excessive number of calls).

Abbreviations: BAF, B allele frequency; CL, cell line; DEL, deletion; DUP, duplication; EA: early access (Affy500K-EA vs. Affy500K); F, female; LRR; log R ratio; M, male; MPX, multiplex; N/A, not available; SPX, simplex; UNK, unknown family type (extended family not evaluated for ASD).

**Table S2A. Sample characteristics**

| Classification                           | Sex        | Stage 1<br>(n=1087)            |                | Stage 2<br>(new cases, n=1359) |                | Combined<br>(n=2446) |                |     |
|------------------------------------------|------------|--------------------------------|----------------|--------------------------------|----------------|----------------------|----------------|-----|
|                                          |            | European<br>n=979 <sup>a</sup> | Other<br>n=108 | European<br>n=1168             | Other<br>n=191 | European<br>n=2147   | Other<br>n=299 |     |
| ASD <sup>b</sup>                         | M          | 826                            | 90             | 1027                           | 171            | 1853                 | 261            |     |
|                                          | F          | 153                            | 18             | 141                            | 20             | 294                  | 38             |     |
| Developmental<br>impairment <sup>c</sup> | Without DI | M                              | 433            | 51                             | 569            | 65                   | 1002           | 116 |
|                                          |            | F                              | 67             | 11                             | 63             | 9                    | 130            | 20  |
|                                          | With DI    | M                              | 361            | 35                             | 413            | 103                  | 774            | 138 |
|                                          |            | F                              | 84             | 7                              | 72             | 11                   | 156            | 18  |
| Family type <sup>d</sup>                 | Simplex    | M                              | 366            | 33                             | 660            | 132                  | 1026           | 165 |
|                                          |            | F                              | 62             | 3                              | 78             | 14                   | 140            | 17  |
|                                          | Multiplex  | M                              | 330            | 53                             | 208            | 30                   | 538            | 83  |
|                                          |            | F                              | 59             | 14                             | 43             | 5                    | 102            | 19  |
|                                          | Unknown    | M                              | 131            | 4                              | 159            | 9                    | 290            | 13  |
|                                          |            | F                              | 31             | 1                              | 20             | 1                    | 51             | 2   |

<sup>a</sup> 17 of the 996 (1.7%) European cases used in Pinto et al.<sup>117</sup> were excluded from the combined sample after applying additional QC steps.

<sup>b</sup> Subjects met criteria for strict autism or autism spectrum according to the ADI-R and/or ADOS (see Methods for detailed description).

<sup>c</sup> Developmental impairment is a hierarchical classification based on scores on full-scale IQ, performance IQ, verbal IQ and the Vineland Adaptive Behavior Scales composite score (see Methods for detailed description). A cut-off score of 70 was applied on all measures. Some data are missing on this item, ranging from 2%-4%.

<sup>d</sup> Family-history reports were taken to inform on the family type. Multiplex families had at least two individuals receiving validated ASD diagnoses who were first to third degree relatives (for third degree, only cousins were considered). Simplex families had only one known individual with ASD in first to third (cousin) degree relatives. Families that did not fall into the multiplex or simplex criteria above were classified as unknown.

The ratio of simplex to multiplex families was 1.82 (1348:742), with 356 (14.5%) families of unknown status. The ratio of males to females was 6.4:1; 46% of cases (n=1,086 out of 2,354) showed developmental impairment (DI). There were 1.43 times more females than males with DI compared to no-DI (M:F for DI is 5.2 vs. 7.45 for no-DI, 95% CI 1.12-1.82, chi square p=0.003). When considering family type, there were 1.47 times more males than females in simplex compared to multiplex families (95% CI 1.13-1.91, chi square p=0.0039), and simplex cases had 1.57 fold more DI compared to multiplex cases (95% CI 1.30-1.90, chi-square p=0.004).

Simplex males: 1026+165=1191

Simplex females: 140+17=157

Simplex M:F ratio: 1191/157= 7.59:1

Multiplex males: 538+83=621

Multiplex females: 102+19=121

Multiplex M:F ratio: 621/121= 5.13:1

**Table S2B. Sample characteristics (continued)**

**Cases**

|                         | European |       | European | Other | Total |
|-------------------------|----------|-------|----------|-------|-------|
|                         | European | Males | Females  |       |       |
| Stage 1                 | 979      | 826   | 153      | 108   | 1,087 |
| Stage 2                 | 1,168    | 1,027 | 141      | 191   | 1,359 |
| Stage 1 + 2 (all cases) | 2,147    | 1,853 | 294      | 299   | 2,446 |

**Cases, breakdowns**

|                    | Stage 1+2 Males |          | Stage 1+2 Females |          | Stage 1+2 All  |          |
|--------------------|-----------------|----------|-------------------|----------|----------------|----------|
|                    | All ancestries  | European | All ancestries    | European | All ancestries | European |
| Single probands    | 92              | 88       | 14                | 14       | 106            | 102      |
| Proband+mother duo | 101             | 83       | 25                | 23       | 126            | 106      |
| Proband+father duo | 120             | 104      | 17                | 15       | 137            | 119      |
| Complete trios     | 1,801           | 1,578    | 276               | 242      | 2,077          | 1,820    |
| Total probands     | 2,114           | 1,853    | 332               | 294      | 2,446          | 2,147    |

**Controls**

| PRIMARY controls            | European |       | European |
|-----------------------------|----------|-------|----------|
|                             | European | Males | Females  |
| Stage 1: 1166 SAGE          | 1,166    | 370   | 796      |
| Stage 2: 1240 HABC + 234 OC | 1,474    | 871   | 603      |
| Totals                      | 2,640    | 1,241 | 1,399    |

**Complete Trios**

|                         | European |       | European | Other | Total (1) | Total (2) |
|-------------------------|----------|-------|----------|-------|-----------|-----------|
|                         | European | Males | Females  |       |           |           |
| Stage 1                 | 862      | 733   | 129      | 91    | 953       | n/a       |
| Stage 2                 | 958      | 845   | 113      | 166   | 1,124     | n/a       |
| Stage 1 + 2 (all trios) | 1,820    | 1,578 | 242      | 257   | 2,077     | 2,096     |

(1) trios with array data after QC available from both parents

(2) trios in (1) plus additional trios with laboratory validation data from both parents;  
n/a: not applicable

**Cases with rare CNVs >30 kb**

|                                 | European | European | European |
|---------------------------------|----------|----------|----------|
|                                 | (all)    | (genic)* | (exonic) |
| Stage 1                         | 868      | 747      | 691      |
| Stage 2                         | 1,046    | 871      | 795      |
| Stage 1 + 2 (all cases)         | 1,914    | 1,618    | 1,486    |
| Stage 1 + 2 (all controls)      | 2,359    | 1,971    | 1,820    |
| Total sample (cases + controls) | 4,273    | 3,589    | 3,306    |

\* with 10 kb-flanking

**Additional controls**

| SECONDARY controls               | Other      |            | Other      |
|----------------------------------|------------|------------|------------|
|                                  | Other      | ancestries | ancestries |
|                                  | ancestries | Males      | Females    |
| Stage 1: SAGE                    | 517        | 185        | 332        |
| Stage 2: HABC                    | 1,326      | 596        | 730        |
| Totals                           | 1,843      | 781        | 1,062      |
| Controls All ancestries - totals | 4,483      | 2,022      | 2,461      |



## Tables S3A-S3C. CNV burden

### Table S3A. Platform comparison

#### CNV rate

| Type |             | Group | 1M single:<br>1382 cases / 1400 controls |                          |                  |                | 1M duo:<br>765 cases / 1240 controls |                          |                  |                |
|------|-------------|-------|------------------------------------------|--------------------------|------------------|----------------|--------------------------------------|--------------------------|------------------|----------------|
|      |             |       | # rare CNVs                              | Baseline CNV rate (Ctrl) | Case/ Ctrl ratio | P value        | # rare CNVs                          | Baseline CNV rate (Ctrl) | Case/ Ctrl ratio | P value        |
| All  | All         |       | 6,506                                    | 2.32                     | 1.02             | 0.27621        | 4,407                                | 2.16                     | 1.05             | 0.06357        |
| DEL  | All         |       | 3,353                                    | 1.17                     | 1.07             | <b>0.03401</b> | 2,248                                | 1.10                     | 1.05             | 0.13466        |
| DUP  | All         |       | 3,153                                    | 1.15                     | 0.96             | 0.83521        | 2,159                                | 1.06                     | 1.05             | 0.14956        |
| All  | 30 – 500 kb |       | 6,088                                    | 2.18                     | 1.01             | 0.39300        | 4,201                                | 2.08                     | 1.02             | 0.25742        |
|      | ≥ 500 kb    |       | 418                                      | 0.14                     | 1.15             | 0.09388        | 206                                  | 0.08                     | 1.79             | <b>0.00005</b> |
|      | ≥ 1 Mb      |       | 127                                      | 0.04                     | 1.24             | 0.13127        | 76                                   | 0.03                     | 2.00             | <b>0.00214</b> |
| DEL  | 30 – 500 kb |       | 3,235                                    | 1.12                     | 1.07             | <b>0.03287</b> | 2,187                                | 1.08                     | 1.02             | 0.34081        |
|      | ≥ 500 kb    |       | 118                                      | 0.04                     | 1.01             | 0.50979        | 61                                   | 0.02                     | 2.87             | <b>0.00005</b> |
|      | ≥ 1 Mb      |       | 42                                       | 0.01                     | 1.65             | 0.08491        | 24                                   | 0.00                     | 4.86             | <b>0.00026</b> |
| DUP  | 30 – 500 kb |       | 2,853                                    | 1.06                     | 0.94             | 0.93625        | 2,014                                | 1.00                     | 1.02             | 0.31434        |
|      | ≥ 500 kb    |       | 300                                      | 0.10                     | 1.20             | 0.06567        | 145                                  | 0.06                     | 1.47             | <b>0.01390</b> |
|      | ≥ 1 Mb      |       | 85                                       | 0.03                     | 1.09             | 0.39456        | 52                                   | 0.02                     | 1.39             | 0.15035        |

#### Total CNV size (kb)

| Type |             | Group | 1M single:<br>1382 cases / 1400 controls |                  |                | 1M duo:<br>765 cases / 1240 controls |                  |                |
|------|-------------|-------|------------------------------------------|------------------|----------------|--------------------------------------|------------------|----------------|
|      |             |       | Baseline size (Ctrl)                     | Case/ Ctrl ratio | P value        | Baseline size (Ctrl)                 | Case/ Ctrl ratio | P value        |
| All  | All         |       | 442.7                                    | 1.10             | <b>0.03171</b> | 365.1                                | 1.39             | <b>0.00001</b> |
| DEL  | All         |       | 222.2                                    | 1.12             | 0.06035        | 190.1                                | 1.35             | <b>0.00011</b> |
| DUP  | All         |       | 362.8                                    | 1.08             | 0.10991        | 305.1                                | 1.41             | <b>0.00005</b> |
| All  | 30 – 500 kb |       | 298.9                                    | 0.99             | 0.56721        | 285.8                                | 1.06             | 0.07551        |
|      | ≥ 500 kb    |       | 995.1                                    | 1.24             | <b>0.00201</b> | 998.7                                | 1.44             | <b>0.00534</b> |
|      | ≥ 1 Mb      |       | 1,621.0                                  | 1.27             | <b>0.00651</b> | 1,519.0                              | 1.59             | <b>0.00514</b> |
| DEL  | 30 – 500 kb |       | 167.9                                    | 1.02             | 0.28813        | 168.7                                | 0.97             | 0.70923        |
|      | ≥ 500 kb    |       | 948.0                                    | 1.45             | <b>0.00841</b> | 964.5                                | 1.40             | 0.08070        |
|      | ≥ 1 Mb      |       | 1,551.0                                  | 1.51             | <b>0.02177</b> | 1,411.0                              | 1.42             | 0.12728        |
| DUP  | 30 – 500 kb |       | 233.9                                    | 0.98             | 0.72926        | 223.3                                | 1.11             | <b>0.01821</b> |
|      | ≥ 500 kb    |       | 985.7                                    | 1.12             | 0.08485        | 980.7                                | 1.45             | <b>0.01585</b> |
|      | ≥ 1 Mb      |       | 1,649.0                                  | 1.11             | 0.15156        | 1,487.0                              | 1.77             | <b>0.00600</b> |

#### Gene count

| Type |             | Group | 1M single:<br>1382 cases / 1400 controls |                              |                           |                       |                |                | 1M duo:<br>765 cases / 1240 controls |                              |                           |                       |                |                |
|------|-------------|-------|------------------------------------------|------------------------------|---------------------------|-----------------------|----------------|----------------|--------------------------------------|------------------------------|---------------------------|-----------------------|----------------|----------------|
|      |             |       | # Rare genic CNVs                        | # Genes inters. by rare CNVs | Baseline gene rate (Ctrl) | Case/ Ctrl gene ratio | P value        | Pcorr          | # Rare genic CNVs                    | # Genes inters. by rare CNVs | Baseline gene rate (Ctrl) | Case/ Ctrl gene ratio | P value        | Pcorr          |
| All  | All         |       | 4,180                                    | 5,210                        | 4.11                      | 1.22                  | <b>0.00140</b> | <b>0.00120</b> | 2,681                                | 3,587                        | 3.12                      | 1.64                  | <b>0.00001</b> | <b>0.00001</b> |
| DEL  | All         |       | 1,806                                    | 2,040                        | 1.37                      | 1.33                  | <b>0.00122</b> | <b>0.01068</b> | 1,164                                | 1,469                        | 1.16                      | 1.40                  | <b>0.00146</b> | 0.05123        |
| DUP  | All         |       | 2,374                                    | 4,002                        | 2.74                      | 1.17                  | <b>0.03831</b> | <b>0.00824</b> | 1,517                                | 2,597                        | 1.95                      | 1.78                  | <b>0.00001</b> | <b>0.00004</b> |
| All  | 30 – 500 kb |       | 3,800                                    | 3,795                        | 3.12                      | 1.03                  | 0.30338        | 0.33000        | 2,496                                | 2,780                        | 2.71                      | 1.12                  | <b>0.02734</b> | <b>0.02645</b> |
|      | ≥ 500 kb    |       | 380                                      | 2,011                        | 0.99                      | 1.84                  | <b>0.00034</b> | <b>0.00234</b> | 185                                  | 1,039                        | 0.41                      | 5.07                  | <b>0.00001</b> | <b>0.00019</b> |
|      | ≥ 1 Mb      |       | 122                                      | 1,075                        | 0.37                      | 2.65                  | <b>0.00096</b> | <b>0.00231</b> | 71                                   | 641                          | 0.22                      | 7.10                  | <b>0.00001</b> | <b>0.00329</b> |
| DEL  | 30 – 500 kb |       | 1,700                                    | 1,407                        | 1.09                      | 1.15                  | <b>0.02952</b> | 0.10020        | 1,113                                | 1,028                        | 1.08                      | 0.92                  | 0.84269        | 0.86370        |
|      | ≥ 500 kb    |       | 106                                      | 732                          | 0.28                      | 2.05                  | <b>0.00992</b> | <b>0.01546</b> | 51                                   | 485                          | 0.08                      | 7.80                  | <b>0.00001</b> | <b>0.00589</b> |
|      | ≥ 1 Mb      |       | 41                                       | 504                          | 0.13                      | 2.80                  | <b>0.01122</b> | <b>0.11560</b> | 23                                   | 339                          | 0.04                      | 10.00                 | <b>0.00005</b> | 0.05489        |
| DUP  | 30 – 500 kb |       | 2,100                                    | 2,849                        | 2.03                      | 0.96                  | 0.70648        | 0.43300        | 1,383                                | 2,045                        | 1.63                      | 1.26                  | <b>0.00239</b> | <b>0.00397</b> |
|      | ≥ 500 kb    |       | 274                                      | 1,561                        | 0.72                      | 1.76                  | <b>0.00545</b> | <b>0.01727</b> | 134                                  | 697                          | 0.33                      | 4.38                  | <b>0.00008</b> | <b>0.01109</b> |
|      | ≥ 1 Mb      |       | 81                                       | 721                          | 0.24                      | 2.57                  | <b>0.01518</b> | <b>0.00677</b> | 48                                   | 391                          | 0.17                      | 6.38                  | <b>0.00086</b> | 0.08588        |

Baseline CNV rate (Ctrl): average number of CNVs per control subject

Baseline size (Ctrl): average total size per control subject in kb

Baseline gene rate (Ctrl): average number of genes intersected by CNVs per control subject

Pcorr: corrected for global differences in CNV size and rate  
100,000 permutations

Global burden analyses for rare CNVs were performed using PLINK v1.0730, R stats and custom scripts, as previously described in detail.<sup>117</sup> We tested for global increased burden in a combined set of 2,147 European ASD cases compared to 2,640 European controls for three measures: CNV rate, CNV size (Tables S3A-S3B) and the average number of genes affected by CNVs (gene-count) (Table 1, main text). We observed a significantly increased burden in the number of genes affected by rare CNVs in cases over controls (Table 1). This enrichment for rare genic CNVs was apparent for both deletions and duplications, and remained after we further controlled for potential case-control differences that could be present due to biological differences or technical biases (Table 1). Similar findings were obtained when data were broken down by array type (Table S3A), or when each stage was considered separately (Table S3B).

**Table S3B. Stage 1 (Pinto et al.) versus Stage 2 (new cases) versus Combined (all 2147 European cases)**

**CNV rate**

|      |             | Stage 1:<br>979 cases / 1166 controls |                          |                  |         | Stage 2:<br>1168 cases / 1474 controls |                          |                  |         | Combined stage 1 + stage 2:<br>2147 cases / 2640 controls |                          |                  |         |
|------|-------------|---------------------------------------|--------------------------|------------------|---------|----------------------------------------|--------------------------|------------------|---------|-----------------------------------------------------------|--------------------------|------------------|---------|
| Type | Group       | # rare CNVs                           | Baseline CNV rate (Ctrl) | Case/ Ctrl ratio | P value | # rare CNVs                            | Baseline CNV rate (Ctrl) | Case/ Ctrl ratio | P value | # rare CNVs                                               | Baseline CNV rate (Ctrl) | Case/ Ctrl ratio | P value |
| All  | All         | 5,153                                 | 2.44                     | 0.97             | 0.85304 | 5,923                                  | 2.16                     | 1.09             | 0.00066 | 11,076                                                    | 2.28                     | 1.03             | 0.05804 |
| DEL  | All         | 2,664                                 | 1.23                     | 1.02             | 0.29184 | 3,063                                  | 1.11                     | 1.09             | 0.00554 | 5,727                                                     | 1.16                     | 1.06             | 0.01238 |
| DUP  | All         | 2,489                                 | 1.21                     | 0.91             | 0.98261 | 2,860                                  | 1.05                     | 1.08             | 0.02640 | 5,349                                                     | 1.12                     | 1.00             | 0.49532 |
| All  | 30 – 500 kb | 4,830                                 | 2.29                     | 0.96             | 0.90681 | 5,634                                  | 2.08                     | 1.06             | 0.01827 | 10,464                                                    | 2.17                     | 1.01             | 0.27705 |
|      | ≥ 500 kb    | 323                                   | 0.14                     | 1.11             | 0.19004 | 289                                    | 0.08                     | 1.88             | 0.00002 | 612                                                       | 0.11                     | 1.43             | 0.00003 |
|      | ≥ 1 Mb      | 91                                    | 0.04                     | 1.02             | 0.50026 | 106                                    | 0.02                     | 2.45             | 0.00003 | 197                                                       | 0.03                     | 1.62             | 0.00066 |
| DEL  | 30 – 500 kb | 2,575                                 | 1.19                     | 1.03             | 0.27934 | 2,978                                  | 1.09                     | 1.07             | 0.03504 | 5,553                                                     | 1.14                     | 1.05             | 0.04012 |
|      | ≥ 500 kb    | 89                                    | 0.04                     | 0.97             | 0.59513 | 85                                     | 0.02                     | 2.71             | 0.00002 | 174                                                       | 0.03                     | 1.59             | 0.00173 |
|      | ≥ 1 Mb      | 27                                    | 0.01                     | 1.28             | 0.32376 | 38                                     | 0.01                     | 4.73             | 0.00005 | 65                                                        | 0.01                     | 2.58             | 0.00024 |
| DUP  | 30 – 500 kb | 2,255                                 | 1.11                     | 0.89             | 0.99523 | 2,656                                  | 0.99                     | 1.05             | 0.13460 | 4,911                                                     | 1.04                     | 0.97             | 0.82515 |
|      | ≥ 500 kb    | 234                                   | 0.10                     | 1.17             | 0.13809 | 204                                    | 0.06                     | 1.63             | 0.00037 | 438                                                       | 0.08                     | 1.37             | 0.00084 |
|      | ≥ 1 Mb      | 64                                    | 0.03                     | 0.93             | 0.66292 | 68                                     | 0.02                     | 1.80             | 0.01192 | 132                                                       | 0.02                     | 1.31             | 0.07407 |

**Total CNV size (kb)**

|      |             | Stage 1:<br>979 cases / 1166 controls |                  |         | Stage 2:<br>1168 cases / 1474 controls |                  |         | Combined stage 1 + stage 2:<br>2147 cases / 2640 controls |                  |         |
|------|-------------|---------------------------------------|------------------|---------|----------------------------------------|------------------|---------|-----------------------------------------------------------|------------------|---------|
| Type | Group       | Baseline size (Ctrl)                  | Case/ Ctrl ratio | P value | Baseline size (Ctrl)                   | Case/ Ctrl ratio | P value | Baseline size (Ctrl)                                      | Case/ Ctrl ratio | P value |
| All  | All         | 453.1                                 | 1.03             | 0.26520 | 368.9                                  | 1.41             | 0.00001 | 406                                                       | 1.22             | 0.00001 |
| DEL  | All         | 222.5                                 | 1.02             | 0.40872 | 196.4                                  | 1.38             | 0.00006 | 207.9                                                     | 1.21             | 0.00028 |
| DUP  | All         | 365.2                                 | 1.06             | 0.20712 | 306.1                                  | 1.36             | 0.00001 | 333.3                                                     | 1.21             | 0.00007 |
| All  | 30 – 500 kb | 304.4                                 | 0.97             | 0.78403 | 290.9                                  | 1.06             | 0.04013 | 296.8                                                     | 1.02             | 0.22737 |
|      | ≥ 500 kb    | 1009.0                                | 1.14             | 0.04687 | 963.5                                  | 1.49             | 0.00027 | 990.1                                                     | 1.32             | 0.00005 |
|      | ≥ 1 Mb      | 1632.0                                | 1.18             | 0.04903 | 1,533.0                                | 1.54             | 0.00144 | 1,591.0                                                   | 1.38             | 0.00013 |
| DEL  | 30 – 500 kb | 168.3                                 | 0.99             | 0.56454 | 173.4                                  | 0.99             | 0.63485 | 171.2                                                     | 0.99             | 0.64394 |
|      | ≥ 500 kb    | 952.3                                 | 1.12             | 0.19717 | 967.3                                  | 1.64             | 0.01571 | 957.4                                                     | 1.42             | 0.00371 |
|      | ≥ 1 Mb      | 1560.0                                | 1.17             | 0.16605 | 1,483.0                                | 1.61             | 0.03369 | 1,531.0                                                   | 1.44             | 0.01435 |
| DUP  | 30 – 500 kb | 233.9                                 | 0.97             | 0.75751 | 226.2                                  | 1.08             | 0.03083 | 229.7                                                     | 1.03             | 0.18388 |
|      | ≥ 500 kb    | 997.0                                 | 1.11             | 0.13966 | 940.2                                  | 1.37             | 0.00872 | 972.4                                                     | 1.24             | 0.00429 |
|      | ≥ 1 Mb      | 1658.0                                | 1.15             | 0.14467 | 1,493.0                                | 1.52             | 0.00919 | 1,586.0                                                   | 1.34             | 0.00380 |

**Gene count**

|      |             | Stage 1:<br>979 cases / 1166 controls |                              |                           |                       |         |         | Stage 2:<br>1168 cases / 1474 controls |                              |                           |                       |         |         | Combined stage 1 + stage 2:<br>2147 cases / 2640 controls |                              |                           |                       |         |         |
|------|-------------|---------------------------------------|------------------------------|---------------------------|-----------------------|---------|---------|----------------------------------------|------------------------------|---------------------------|-----------------------|---------|---------|-----------------------------------------------------------|------------------------------|---------------------------|-----------------------|---------|---------|
| Type | Group       | # Rare genic CNVs                     | # Genes inters. by rare CNVs | Baseline gene rate (Ctrl) | Case/ Ctrl gene ratio | P value | Pcorr   | # Rare genic CNVs                      | # Genes inters. by rare CNVs | Baseline gene rate (Ctrl) | Case/ Ctrl gene ratio | P value | Pcorr   | # Rare genic CNVs                                         | # Genes inters. by rare CNVs | Baseline gene rate (Ctrl) | Case/ Ctrl gene ratio | P value | Pcorr   |
| All  | All         | 3,252                                 | 4,319                        | 4.16                      | 1.17                  | 0.02076 | 0.00462 | 3,607                                  | 4,514                        | 3.08                      | 1.66                  | 0.00001 | 0.00001 | 6,859                                                     | 6,745                        | 3.55                      | 1.41                  | 0.00001 | 0.00001 |
| DEL  | All         | 1,378                                 | 1,505                        | 1.32                      | 1.25                  | 0.01603 | 0.01603 | 1,568                                  | 1,924                        | 1.16                      | 1.55                  | 0.00001 | 0.01498 | 2,946                                                     | 2,804                        | 1.23                      | 1.40                  | 0.00001 | 0.00049 |
| DUP  | All         | 1,874                                 | 3,417                        | 2.84                      | 1.14                  | 0.10573 | 0.01342 | 2,039                                  | 3,244                        | 1.92                      | 1.73                  | 0.00001 | 0.00001 | 3,913                                                     | 5,217                        | 2.32                      | 1.41                  | 0.00001 | 0.00001 |
| All  | 30 – 500 kb | 2,962                                 | 3,211                        | 3.14                      | 0.98                  | 0.60840 | 0.29800 | 3,345                                  | 3,414                        | 2.70                      | 1.15                  | 0.00384 | 0.02582 | 6,307                                                     | 5,163                        | 2.89                      | 1.07                  | 0.03752 | 0.03628 |
|      | ≥ 500 kb    | 290                                   | 1,549                        | 1.02                      | 1.75                  | 0.00488 | 0.00700 | 262                                    | 1,485                        | 0.38                      | 5.29                  | 0.00001 | 0.00001 | 552                                                       | 2,491                        | 0.66                      | 2.88                  | 0.00001 | 0.00001 |
|      | ≥ 1 Mb      | 86                                    | 805                          | 0.38                      | 2.39                  | 0.01245 | 0.00648 | 101                                    | 865                          | 0.17                      | 8.12                  | 0.00001 | 0.00001 | 187                                                       | 1,337                        | 0.26                      | 4.48                  | 0.00001 | 0.00001 |
| DEL  | 30 – 500 kb | 1,300                                 | 1,137                        | 1.07                      | 1.16                  | 0.03994 | 0.03134 | 1,495                                  | 1,296                        | 1.06                      | 0.99                  | 0.55163 | 0.79270 | 2,795                                                     | 2,014                        | 1.07                      | 1.07                  | 0.11389 | 0.20110 |
|      | ≥ 500 kb    | 78                                    | 454                          | 0.25                      | 1.63                  | 0.09459 | 0.08104 | 73                                     | 696                          | 0.09                      | 7.91                  | 0.00001 | 0.00051 | 151                                                       | 947                          | 0.16                      | 3.60                  | 0.00001 | 0.00051 |
|      | ≥ 1 Mb      | 26                                    | 278                          | 0.11                      | 2.22                  | 0.08343 | 0.13570 | 37                                     | 492                          | 0.07                      | 7.84                  | 0.00002 | 0.10500 | 63                                                        | 647                          | 0.08                      | 4.58                  | 0.00004 | 0.02289 |
| DUP  | 30 – 500 kb | 1,662                                 | 2,411                        | 2.07                      | 0.9                   | 0.92581 | 0.62180 | 1,850                                  | 2,491                        | 1.63                      | 1.26                  | 0.00094 | 0.00364 | 3,512                                                     | 3,934                        | 1.83                      | 1.08                  | 0.08690 | 0.03750 |
|      | ≥ 500 kb    | 212                                   | 1,325                        | 0.77                      | 1.79                  | 0.01117 | 0.01837 | 189                                    | 979                          | 0.28                      | 4.43                  | 0.00001 | 0.00026 | 401                                                       | 1,896                        | 0.50                      | 2.64                  | 0.00001 | 0.00026 |
|      | ≥ 1 Mb      | 60                                    | 632                          | 0.27                      | 2.46                  | 0.03874 | 0.01247 | 64                                     | 471                          | 0.11                      | 8.30                  | 0.00006 | 0.00176 | 124                                                       | 890                          | 0.18                      | 4.43                  | 0.00004 | 0.00036 |

Baseline CNV rate (Ctrl): average number of CNVs per control subject

Baseline size (Ctrl): average total size per control subject in kb

Baseline gene rate (Ctrl): average number of genes intersected by CNVs per control subject

Pcorr: corrected for global differences in CNV size and rate  
100,000 permutations

**Table S3C. Characteristics of rare CNVs in 2,147 European ASD probands and 2,640 European controls**

|                                                        | ASD probands, European<br>(n = 2,147 probands; 1,838 trios) |                                                                               |                        |                                       | Controls, European<br>(n = 2,640)          |                                                                              |                        |
|--------------------------------------------------------|-------------------------------------------------------------|-------------------------------------------------------------------------------|------------------------|---------------------------------------|--------------------------------------------|------------------------------------------------------------------------------|------------------------|
|                                                        | Stringent CNVs <sup>a</sup><br>(all sizes)                  | Stringent CNVs <sup>b</sup><br>(≥30 kb size, no peri-centromeric + no segdup) | Rare CNVs <sup>c</sup> | Rare <i>de novo</i> CNVs <sup>d</sup> | Stringent CNVs <sup>a</sup><br>(all sizes) | Stringent CNV <sup>b</sup><br>(≥30 kb size, no peri-centromeric + no segdup) | Rare CNVs <sup>c</sup> |
| Samples                                                | 2,147                                                       | 2,147                                                                         | 1,941                  | 86                                    | 2,640                                      | 2,640                                                                        | 2,359                  |
| # CNVs                                                 | 36,034                                                      | 15,423                                                                        | 5,054                  | 89                                    | 46,101                                     | 20,341                                                                       | 6,022                  |
| Mean / median CNVs per genome <sup>e</sup>             | 16.8 / 16                                                   | 7.18 / 7                                                                      | 2.64 / 2               | 1.03 / 1                              | 17.5 / 17                                  | 7.70 / 8                                                                     | 2.55 / 2               |
| Mean / median CNV size (kb)                            | 107.0 / 44.8                                                | 162.5 / 94.5                                                                  | 187.9 / 88.4           | 1,244.5 / 477.4                       | 91.0 / 39.3                                | 150.6 / 89.9                                                                 | 159.1 / 87.0           |
| % Gain / loss                                          | 26.4 / 73.6                                                 | 39.6 / 60.4                                                                   | 47.9 / 52.1            | 33.7 / 66.3                           | 24.8 / 75.2                                | 36.9 / 63.1                                                                  | 49.3 / 50.7            |
| # Recurrent/overlapping CNVs (%) / # loci <sup>f</sup> | 33,803 (93.8%) / 1,536                                      | 13,812 (89.5%) / 912                                                          | 3,431 (67.9%) / 822    | 34 (38.2%) / 11                       | 43,905 (95.2%) / 1,613                     | 18,641 (91.6%) / 1,019                                                       | 4,321 (71.8%) / 936    |
| # CNVs >1 Mb (%)                                       | 365 (1.0%)                                                  | 277 (1.8%)                                                                    | 112 (2.2%)             | 28 (31.5%)                            | 264 (0.6%)                                 | 226 (1.1%)                                                                   | 85 (1.4%)              |
| # CNVs >100-999 kb (%)                                 | 9,782 (27.1%)                                               | 7,019 (45.5%)                                                                 | 2,445 (48.4%)          | 42 (47.2%)                            | 11,945 (25.9%)                             | 9,341 (45.9%)                                                                | 2,537 (42.1%)          |

<sup>a</sup> Stringent CNVs are CNV called by two or more algorithms. CNVs detected in the same individual by at least two algorithms were merged with the outside probes used as boundaries. All sizes, no filter applied.

<sup>b</sup> Stringent CNVs ≥30 kb and filtered for pericentromeric calls as well as calls overlapped by segmental duplications (segdup) for >50% of their length.

<sup>c</sup> Rare stringent CNVs ≥30 kb (filtered for pericentromeric and segdup calls) present at a frequency <1% in the total sample of 2,147 European cases and 2,640 European controls.

<sup>d</sup> Inheritance state was estimated for CNVs detected in 1,838 European probands from complete trios, including 1,820 complete trios with array data after QC available from both parents plus 18 families in which at least one of the parents failed initial array QC but additional laboratory validation was obtained for both parents. Laboratory validation confirmed that at least 4.7% (86/1,838) of European families carried at least one *de novo* CNV (average of 1 verified *de novo* CNV/sample). Similar rates were obtained for families of all ancestries, with 4.7% (98/2,096) carrying at least one *de novo* event.

<sup>e</sup> Probands with CNVs larger than 7.5 Mb are listed in **Table S1C**; they were excluded from the main burden analyses.

<sup>f</sup> Number and percentage of recurrent and/or overlapping CNVs in the dataset (%), and corresponding number of CNV loci.

**Table S4. Rare *de novo* CNVs in probands confirmed experimentally**

| Sample ID        | Sex | Ancestry | CNV type | Chr#:start-end (hg18) | Size      | Cytoband        | RefSeq gene(s)                                                                                                                                                                                                                                                      | Location    |
|------------------|-----|----------|----------|-----------------------|-----------|-----------------|---------------------------------------------------------------------------------------------------------------------------------------------------------------------------------------------------------------------------------------------------------------------|-------------|
| 14310_4270       | M   | Eur      | Gain     | 1:105623065-105795181 | 172,117   | 1p21.1          | —                                                                                                                                                                                                                                                                   | intergenic  |
| 14310_4270       | M   | Eur      | Gain     | 1:105896243-106480692 | 584,450   | 1p21.1          | —                                                                                                                                                                                                                                                                   | intergenic  |
| 16035_1571013001 | M   | Eur      | Gain     | 1:144482933-146325557 | 1,842,625 | 1q21.1          | 15 genes (includes <i>CHD1L</i> , <i>GJA5</i> , <i>GJA8</i> )                                                                                                                                                                                                       | gene/exonic |
| 1952_301         | M   | Other    | Gain     | 1:144500467-146336720 | 1,836,254 | 1q21.1          | 15 genes (includes <i>CHD1L</i> , <i>GJA5</i> , <i>GJA8</i> )                                                                                                                                                                                                       | gene/exonic |
| 8635_201         | M   | Eur      | Loss     | 1:144500467-146377870 | 1,877,404 | 1q21.1          | 17 genes (includes <i>CHD1L</i> , <i>GJA5</i> , <i>GJA8</i> )                                                                                                                                                                                                       | gene/exonic |
| 13135_1523       | F   | Eur      | Gain     | 1:144838594-146308287 | 1,469,694 | 1q21.1          | 14 genes (includes <i>CHD1L</i> , <i>GJA5</i> , <i>GJA8</i> )                                                                                                                                                                                                       | gene/exonic |
| 6356_5           | M   | Eur      | Loss     | 1:2118508-2325536     | 207,029   | 1p36.33-p36.32  | <i>MORN1</i> , <i>SKI</i> , <i>LOC100129534</i> , <i>RER1</i> , <i>C1orf86</i>                                                                                                                                                                                      | gene/exonic |
| 8658_201         | F   | Eur      | Loss     | 1:98175622-100923952  | 2,748,331 | 1p21.3-p21.2    | 18 genes (includes <i>CDC14A</i> , <i>MIR137</i> , <i>RTCD1</i> , <i>SNX7</i> )                                                                                                                                                                                     | gene/exonic |
| 9877_204         | M   | Other    | Gain     | 1:98247355-99645560   | 1,398,206 | 1p21.3-p21.2    | <i>LOC100129620</i> , <i>LPPRA</i> , <i>LPPR5</i> , <i>MIR137</i> , <i>SNX7</i>                                                                                                                                                                                     | gene/exonic |
| 5089_5           | M   | Other    | Loss     | 2:102292943-102345460 | 52,518    | 2q12.1          | <i>IL1RL1</i>                                                                                                                                                                                                                                                       | gene/exonic |
| 13082_963        | M   | Eur      | Gain     | 2:11712589-11741036   | 28,448    | 2p25.1          | <i>NTSR2</i>                                                                                                                                                                                                                                                        | gene/exonic |
| 4260_1           | M   | Eur      | Gain     | 2:119603876-119882278 | 278,403   | 2q14.2          | <i>C1QL2</i> , <i>C2orf76</i> , <i>DBI</i> , <i>STEAP3</i>                                                                                                                                                                                                          | gene/exonic |
| 13027_353        | F   | Eur      | Gain     | 2:144837809-145315383 | 477,575   | 2q22.3          | <i>DKFZp68601327</i> , <i>ZEB2</i>                                                                                                                                                                                                                                  | gene/exonic |
| 14414_5230       | M   | Eur      | Loss     | 2:230486629-230547253 | 60,625    | 2q36.3          | <i>FBXO36</i> , <i>TRIP12</i>                                                                                                                                                                                                                                       | gene/exonic |
| 14068_1180       | M   | Eur      | Gain     | 2:50493827-50677835   | 184,009   | 2p16.3          | <i>NRXN1</i>                                                                                                                                                                                                                                                        | gene/exonic |
| 13017_223        | F   | Eur      | Loss     | 2:50539877-50730546   | 190,670   | 2p16.3          | <i>NRXN1</i>                                                                                                                                                                                                                                                        | gene/exonic |
| 13216_2383       | M   | Eur      | Loss     | 2:50968208-51214171   | 245,964   | 2p16.3          | <i>NRXN1</i>                                                                                                                                                                                                                                                        | gene/exonic |
| 13153_1703       | M   | Eur      | Loss     | 2:50990306-51222043   | 231,738   | 2p16.3          | <i>NRXN1</i>                                                                                                                                                                                                                                                        | gene/exonic |
| 13037_463        | M   | Eur      | Loss     | 2:51002576-51157742   | 155,167   | 2p16.3          | <i>NRXN1</i>                                                                                                                                                                                                                                                        | gene/exonic |
| 3616_3           | M   | Eur      | Loss     | 3:9474320-9498362     | 24,043    | 3p25.3          | <i>SETD5</i>                                                                                                                                                                                                                                                        | gene/exonic |
| 5220_3           | F   | Eur      | Gain     | 3:19127998-19640299   | 512,302   | 3p24.3          | <i>KCNH8</i>                                                                                                                                                                                                                                                        | gene/exonic |
| 3174_3           | M   | Eur      | Loss     | 3:19921061-20096832   | 175,772   | 3p24.3          | <i>C3orf48</i> , <i>EFHB</i> , <i>KAT2B</i> , <i>RAB5A</i>                                                                                                                                                                                                          | gene/exonic |
| 5245_3           | M   | Eur      | Loss     | 3:117285007-117477191 | 192,185   | 3q13.31         | <i>LSAMP</i> (50% mosaic)                                                                                                                                                                                                                                           | gene/exonic |
| 8587_210         | F   | Eur      | Gain     | 3:139760896-140127703 | 366,808   | 3q22.3          | <i>CEP70</i> , <i>FAIM</i> , <i>PIK3CB</i>                                                                                                                                                                                                                          | gene/exonic |
| 8588_201         | M   | Eur      | Loss     | 3:195971510-197675831 | 1,704,322 | 3q29            | 20 genes (includes <i>PCYT1A</i> , <i>TFRC</i> , <i>TNK2</i> )                                                                                                                                                                                                      | gene/exonic |
| 8677_201         | M   | Other    | Gain     | 4:94659049-95289667   | 630,619   | 4q22.2          | <i>ATOH1</i> , <i>GRID2</i>                                                                                                                                                                                                                                         | gene/exonic |
| 6402_3           | M   | Eur      | Gain     | 4:98781694-99627129   | 845,436   | 4q22.3-q23      | <i>C4orf37</i> , <i>RAP1GDS1</i> , <i>TSPAN5</i>                                                                                                                                                                                                                    | gene/exonic |
| 8709_201         | F   | Eur      | Loss     | 5:88588170-89505509   | 917,340   | 5q14.3          | <i>MIR3660</i>                                                                                                                                                                                                                                                      | gene/exonic |
| 5386_3           | M   | Other    | Loss     | 6:156785155-158489874 | 1,704,720 | 6q25.3          | <i>ARID1B</i> , <i>MIR3692</i> , <i>SERAC1</i> , <i>SNX9</i> , <i>SYNJ2</i> , <i>ZDHHC14</i>                                                                                                                                                                        | gene/exonic |
| 6164_3           | F   | Eur      | Gain     | 6:160023074-160081618 | 58,545    | 6q25.3          | <i>SOD2</i> , <i>WTAP</i>                                                                                                                                                                                                                                           | gene/exonic |
| 8612_201         | M   | Eur      | Loss     | 6:162588879-162629938 | 41,060    | 6q26            | <i>PARK2</i>                                                                                                                                                                                                                                                        | gene/exonic |
| 8404_201         | M   | Eur      | Loss     | 6:169136788-170761395 | 1,624,608 | 6q27            | 14 genes (includes <i>PSMB1</i> , <i>TBP</i> , <i>TCTE3</i> , <i>THBS2</i> , <i>WDR27</i> )                                                                                                                                                                         | gene/exonic |
| 5353_3           | F   | Eur      | Loss     | 6:33399849-33512042   | 112,194   | 6p21.32         | <i>CUTA</i> , <i>KIFC1</i> , <i>PHF1</i> , <i>SYNGAP1</i>                                                                                                                                                                                                           | gene/exonic |
| 18133_302        | M   | Eur      | Gain     | 6:69540429-73375020   | 3,834,592 | 6q12-q13        | <i>B3GAT2</i> , <i>BAI3</i> , <i>C6orf155</i> , <i>C6orf57</i> , <i>COL19A1</i> , <i>COL9A1</i> , <i>FAM135A</i> , <i>LMBRD1</i> , <i>MIR30A</i> , <i>MIR30C2</i> , <i>OGFRL1</i> , <i>RIMS1</i> , <i>SMAP1</i>                                                     | gene/exonic |
| 6248_3           | M   | Eur      | Loss     | 6:86352577-86376159   | 23,583    | 6q14.3          | <i>SNX14</i> , <i>SYNCRIP</i>                                                                                                                                                                                                                                       | gene/exonic |
| 1960_301         | F   | Eur      | Loss     | 7:102699832-102798745 | 98,914    | 7q22.1          | <i>DNAJC2</i> , <i>DPY19L2P2</i> , <i>PMPCB</i> , <i>PSMC2</i> , <i>SLC26A5</i>                                                                                                                                                                                     | gene/exonic |
| 5370_3           | M   | Eur      | Loss     | 7:153775586-153844747 | 69,162    | 7q36.2          | <i>DPP6</i>                                                                                                                                                                                                                                                         | gene/exonic |
| 8446_201         | M   | Eur      | Loss     | 7:72344426-73782113   | 1,437,688 | 7q11.23         | 28 genes (includes <i>GTF2F</i> , <i>GTF2IRD1</i> , <i>LAT2</i> , <i>LIMK1</i> , <i>STX1A</i> )                                                                                                                                                                     | gene/exonic |
| 1142_4           | F   | Eur      | Gain     | 8:48631388-48802529   | 171,142   | 8q11.21         | <i>KIAA0146</i>                                                                                                                                                                                                                                                     | gene/exonic |
| 6321_3           | M   | Eur      | Loss     | 8:65354366-66254869   | 900,504   | 8q12.3-q13.1    | <i>BHLHE22</i> , <i>CYP7B1</i> , <i>LOC100130155</i> , <i>LOC401463</i> , <i>MIR124-2</i>                                                                                                                                                                           | gene/exonic |
| 5290_3           | M   | Other    | Gain     | 8:704383-1521910      | 817,528   | 8p23.3          | <i>DLGAP2</i> , <i>LOC286083</i>                                                                                                                                                                                                                                    | gene/exonic |
| 8500_201         | M   | Eur      | Loss     | 8:74692898-74967280   | 274,383   | 8q21.11         | <i>STAU2</i> , <i>UBE2W</i>                                                                                                                                                                                                                                         | gene/exonic |
| 14237_2650       | M   | Eur      | Loss     | 9:103456776-107140273 | 3,683,498 | 9q31.1          | <i>ABCA1</i> , <i>CYLC2</i> , <i>GRIN3A</i> , <i>LOC286367</i> , <i>NIPSNAP3A</i> , <i>NIPSNAP3B</i> , <i>OR13C2</i> , <i>OR13C3</i> , <i>OR13C4</i> , <i>OR13C5</i> , <i>OR13C8</i> , <i>OR13C9</i> , <i>OR13D1</i> , <i>OR13F1</i> , <i>SLC44A1</i> , <i>SMC2</i> | gene/exonic |
| 14417_5260       | M   | Eur      | Loss     | 9:117311405-117727764 | 416,360   | 9q33.1          | <i>C9orf27</i> (or <i>LINC00474</i> )                                                                                                                                                                                                                               | gene/exonic |
| 9756_201         | M   | Other    | Loss     | 9:132572435-132597937 | 25,503    | 9q34.12         | <i>ABL1</i>                                                                                                                                                                                                                                                         | gene/exonic |
| 6259_3           | M   | Eur      | Loss     | 9:139516033-140208462 | 692,430   | 9q34.3          | <i>ARRDC1</i> , <i>C9orf37</i> , <i>CACNA1B</i> , <i>EHMT1</i> , <i>FL40292</i> (or <i>EHMT1-IT1</i> ), <i>MIR602</i> , <i>MRPL41</i> , <i>PNPLA7</i> , <i>TUBBP5</i> , <i>WDR85</i> , <i>ZMYND19</i>                                                               | gene/exonic |
| 6246_4           | M   | Eur      | Loss     | 9:9399606-9631169     | 231,564   | 9p23            | <i>PTPRD</i>                                                                                                                                                                                                                                                        | gene/exonic |
| 5032_4           | M   | Eur      | Loss     | 9:98998-334508        | 235,511   | 9p24.3          | <i>C9orf66</i> , <i>CBWD1</i> , <i>DOCK8</i> , <i>FOXD4</i>                                                                                                                                                                                                         | gene/exonic |
| 13123_1403       | F   | Eur      | Loss     | 9:98998-3682923       | 3,583,926 | 9p24.3-p24.2    | <i>C9orf66</i> , <i>CBWD1</i> , <i>DMRT1</i> , <i>DMRT2</i> , <i>DMRT3</i> , <i>DOCK8</i> , <i>FLJ35024</i> , <i>FOXD4</i> , <i>KANK1</i> , <i>KCNV2</i> , <i>KIAA0020</i> , <i>RFX3</i> , <i>SMARCA2</i> , <i>VLDLR</i>                                            | gene/exonic |
| 18172_302        | M   | Other    | Gain     | 10:34963905-35536952  | 573,048   | 10p11.21        | <i>CREM</i> , <i>CUL2</i> , <i>PARD3</i>                                                                                                                                                                                                                            | gene/exonic |
| 8534_201         | M   | Eur      | Loss     | 10:45633089-51564756  | 5,931,668 | 10q11.21-q11.23 | 56 genes (includes <i>CHAT</i> , <i>ERCC6</i> , <i>MAPK8</i> , <i>SLC18A3</i> )                                                                                                                                                                                     | gene/exonic |

| Sample ID        | Sex | Ancestry | CNV type | Chr#:start-end (hg18)  | Size      | Cytoband        | RefSeq gene(s)                                                                                               | Location      |
|------------------|-----|----------|----------|------------------------|-----------|-----------------|--------------------------------------------------------------------------------------------------------------|---------------|
| 14393_5020       | M   | Eur      | Loss     | 10:74801551-75278951   | 477,401   | 10q22.2         | AGAP5, ANXA7, BMS1P4, CAMK2G, CHCHD1, FUT11, KIAA0913, MYOZ1, NDST2, PPP3CB, SEC24C, SYNPO2L, USP54, ZMYND17 | gene/exonic   |
| 6240_4           | M   | Eur      | Loss     | 11:126633939-132060374 | 5,426,436 | 11q24.2-q25     | 20 genes (includes ARHGAP32, SNX19)                                                                          | gene/exonic   |
| 6325_3           | M   | Eur      | Loss     | 11:70077507-70506315   | 428,809   | 11q13.3         | MIR3664, SHANK2                                                                                              | gene/exonic   |
| 6319_3           | M   | Eur      | Loss     | 11:70119917-70187872   | 67,956    | 11q13.3         | SHANK2                                                                                                       | gene/exonic   |
| 5237_3           | M   | Eur      | Loss     | 11:70154458-70220632   | 66,175    | 11q13.3         | SHANK2                                                                                                       | gene/exonic   |
| 6053_3           | M   | Eur      | Gain     | 12:54218922-58779615   | 4,560,694 | 12q13.2-q14.1   | 101 genes (includes CDK2, CDK4, SMARCC2)                                                                     | gene/exonic   |
| 5272_3           | M   | Other    | Loss     | 12:98445422-98540678   | 95,257    | 12q23.1         | ANKS1B                                                                                                       | gene/intronic |
| 1050_3           | F   | Eur      | Gain     | 14:20279711-20345174   | 65,464    | 14q11.2         | EDDM3A, EDDM3B, RNASE1, RNASE6                                                                               | gene/exonic   |
| 8638_201         | M   | Eur      | Loss     | 14:35203374-35369853   | 166,480   | 14q13.2         | BRMS1L, RALGAPA1                                                                                             | gene/exonic   |
| 4272_1           | M   | Eur      | Loss     | 14:63824114-65347410   | 1,523,297 | 14q23.2-q23.3   | 18 genes (includes ESR2, MAX, MTHFD1, SPTB)                                                                  | gene/exonic   |
| 17009_1          | M   | Eur      | Loss     | 14:78575296-78596793   | 21,498    | 14q31.1         | NRXN3                                                                                                        | gene/intronic |
| 20187_1464001    | M   | Eur      | Gain     | 15:18811937-26209270   | 7,397,334 | 15q11.2-q13.1   | 125 genes (includes CYFIP1, UBE3A, HERC2)                                                                    | gene/exonic   |
| 8630_201         | M   | Eur      | Gain     | 15:19800798-26209270   | 6,408,473 | 15q11.2-q13.1   | 117 genes (includes CYFIP1, UBE3A, HERC2)                                                                    | gene/exonic   |
| 20069_1328001    | M   | Eur      | Gain     | 15:20203578-26209270   | 6,005,693 | 15q11.2-q13.1   | 112 genes (includes CYFIP1, UBE3A, HERC2)                                                                    | gene/exonic   |
| 17035_1          | F   | Eur      | Gain     | 15:20274130-26120360   | 5,846,231 | 15q11.2-q13.1   | 111 genes (includes CYFIP1, UBE3A, HERC2)                                                                    | gene/exonic   |
| 8430_204         | M   | Other    | Loss     | 15:20301669-20777695   | 476,027   | 15q11.2         | CYFIP1, NIPA1, NIPA2, TUBGCP5, WHAMML1                                                                       | gene/exonic   |
| 13050_593        | M   | Eur      | Gain     | 15:21190624-26203954   | 5,013,331 | 15q11.2-q13.1   | 101 genes (includes UBE3A, HERC2)                                                                            | gene/exonic   |
| 16040_1571029001 | M   | Eur      | Loss     | 15:28450423-30303265   | 1,852,843 | 15q13.2-q13.3   | ARRHGAP11B, CHRFA7A, CHRNA7, FAM7A1, FAM7A2, FAN1, KLF13, LOC100288637, MIR211, MTMR10, OTUD7A, TRPM1        | gene/exonic   |
| 6101_4           | M   | Other    | Loss     | 15:74735339-74929817   | 194,479   | 15q24.3         | SCAPER                                                                                                       | gene/exonic   |
| 8695_201         | M   | Eur      | Loss     | 15:81728085-82623936   | 895,852   | 15q25.2         | ADAMTSL3, BNC1, LOC648809, SH3GL3                                                                            | gene/exonic   |
| 14181_2940       | M   | Eur      | Gain     | 15:82906265-82985247   | 78,983    | 15q25.2         | LOC100506874, SCAND2, UBE2Q2P1, ZSCAN2                                                                       | gene/exonic   |
| 14070_1230       | M   | Eur      | Loss     | 15:91200007-91283004   | 82,998    | 15q26.1         | CHD2, LOC100507217, MIR3175                                                                                  | gene/exonic   |
| 2204_1           | M   | Eur      | Loss     | 16:29466569-30147029   | 680,461   | 16p11.2         | 42 genes (includes KCTD13, MAPK3, SEZ6L2)                                                                    | gene/exonic   |
| 20089_1391001    | M   | Eur      | Loss     | 16:29502984-30107306   | 604,323   | 16p11.2         | 29 genes (includes KCTD13, MAPK3, SEZ6L2)                                                                    | gene/exonic   |
| 5068_3           | F   | Eur      | Loss     | 16:29502984-30127026   | 624,043   | 16p11.2         | 40 genes (includes KCTD13, MAPK3, SEZ6L2)                                                                    | gene/exonic   |
| 5262_4           | M   | Eur      | Gain     | 16:29502984-30210849   | 707,866   | 16p11.2         | 43 genes (includes KCTD13, MAPK3, SEZ6L2)                                                                    | gene/exonic   |
| 4030_1           | M   | Eur      | Gain     | 16:29554843-30107306   | 552,464   | 16p11.2         | 28 genes (includes KCTD13, MAPK3, SEZ6L2)                                                                    | gene/exonic   |
| 5359_4           | M   | Eur      | Loss     | 16:29554843-30195224   | 640,382   | 16p11.2         | 42 genes (includes KCTD13, MAPK3, SEZ6L2)                                                                    | gene/exonic   |
| 3439_3           | M   | Eur      | Loss     | 17:17156307-18262979   | 1,106,673 | 17p11.2         | 22 genes (includes RAI1, SREBF1, LGL1, TOP3A)                                                                | gene/exonic   |
| 2211_1           | F   | Eur      | Loss     | 17:17169258-20101517   | 2,932,260 | 17p11.2         | 53 genes (includes MAPK7, RAI1, SREBF1, FAM83G, LGL1, TOP3A)                                                 | gene/exonic   |
| 5056_4           | M   | Eur      | Gain     | 17:34612208-34732327   | 120,120   | 17q12           | FBXL20, RPL19, STAC2                                                                                         | gene/exonic   |
| 8463_202         | M   | Eur      | Loss     | 17:52774693-52895975   | 121,283   | 17q22           | MSI2                                                                                                         | gene/exonic   |
| 5444_3           | M   | Eur      | Gain     | 17:76953064-77782267   | 829,204   | 17q25.3         | 38 genes (includes ACTG1, ARHGDI1, FASN, RAC3, HGS, DUS1L)                                                   | gene/exonic   |
| 5444_3           | M   | Eur      | Loss     | 17:77785939-77849717   | 63,779    | 17q25.3         | CSNK1D, SLC16A3                                                                                              | gene/exonic   |
| 3477_3           | M   | Eur      | Loss     | 18:30280260-30327512   | 47,253    | 18q12.1         | DTNA                                                                                                         | gene/exonic   |
| 14331_4450       | M   | Eur      | Loss     | 18:72085223-73670156   | 1,584,934 | 18q23           | GALR1, LOC284276, MBP, ZNF236, ZNF516                                                                        | gene/exonic   |
| 6358_6           | M   | Eur      | Loss     | 19:4548413-5287389     | 738,977   | 19p13.3         | ARRDC5, C19orf10, DPP9, FEM1A, KDM4B, MIR7-3, NCRNA00306, PLIN3, PTPRS, TICAM1, TNFAIP8L1, UHRF1             | gene/exonic   |
| 5335_3           | M   | Eur      | Loss     | 20:14545734-14948785   | 403,052   | 20p12.1         | MACROD2, MACROD2-AS1                                                                                         | gene/exonic   |
| 5046_3           | M   | Other    | Loss     | 20:8607242-8637441     | 30,200    | 20p12.3         | PLCB1                                                                                                        | gene/exonic   |
| 20180_1704001    | M   | Eur      | Gain     | 21:43018846-43444308   | 425,463   | 21q22.3         | CBS, NDUFV3, PDE9A, PKNOX1, UZAF1, WDR4                                                                      | gene/exonic   |
| 3183_7           | M   | Eur      | Loss     | 22:17241748-19819918   | 2,578,171 | 22q11.21        | 63 genes (includes TBX1, CRKL, TSSK2)                                                                        | gene/exonic   |
| 8627_201         | M   | Eur      | Gain     | 22:17257787-19793730   | 2,535,944 | 22q11.21        | 63 genes (includes TBX1, CRKL, TSSK2)                                                                        | gene/exonic   |
| 17015_1          | M   | Eur      | Loss     | 22:17257787-19795780   | 2,537,994 | 22q11.21        | 63 genes (includes TBX1, CRKL, TSSK2)                                                                        | gene/exonic   |
| 4271_1           | M   | Eur      | Gain     | 22:17257787-19795780   | 2,537,994 | 22q11.21        | 63 genes (includes TBX1, CRKL, TSSK2)                                                                        | gene/exonic   |
| 8630_201         | M   | Eur      | Loss     | 22:32346124-32413987   | 67,864    | 22q12.3         | LARGE                                                                                                        | gene/exonic   |
| 2072_1           | M   | Eur      | Loss     | 22:45159185-49582267   | 4,423,083 | 22q13.31-q13.33 | 47 genes (includes SHANK3)                                                                                   | gene/exonic   |
| 6130_4           | F   | Eur      | Loss     | 22:47996161-49512530   | 1,516,370 | 22q13.32-q13.33 | 37 genes (includes SHANK3)                                                                                   | gene/exonic   |
| 14291_4120       | F   | Eur      | Loss     | 22:49468716-49485255   | 16,540    | 22q13.33        | SHANK3                                                                                                       | gene/exonic   |
| 16079_1571066001 | M   | Eur      | Loss     | 22:49470371-49567383   | 97,013    | 22q13.33        | ACR, RABL2B, RPL23AP82, SHANK3                                                                               | gene/exonic   |
| 20013_1075001    | M   | Eur      | Gain     | X:153239048-153521797  | 282,750   | Xq28            | 20 genes (includes EMD, FLNA, GDI1, IKBKG, PLXNA3, RPL10)                                                    | gene/exonic   |
| 16076_1571045001 | M   | Eur      | Loss     | X:22768481-23133948    | 365,468   | Xp22.11         | DDX53 (includes PTCHD1-AS)                                                                                   | gene/exonic   |

We identified 102 rare *de novo* CNVs in 99 cases; three individuals (5444\_3, 8630\_201 and 14310\_4270) have 2 *de novo* CNV each. Of the 99 subjects with *de novo* events, 60 (60%) are simplex, 26 (27%) multiplex, and 13 (13%) of unknown status. Eleven *de novo* chromosomal abnormalities >7.5 Mb identified in probands are listed in **Table S1C**. Abbreviations: Eur, European; F, female; M, male.

**Table S5A. Parent of origin for rare *de novo* validated CNVs in probands**

| Sample ID        | Chr#:start-end (hg18)  | CNV type | Family type | Parent of origin | SNPs: #paternal #maternal total                        |
|------------------|------------------------|----------|-------------|------------------|--------------------------------------------------------|
| 14310_4270       | 1:105623065-105795181  | Gain     | SPX         | Paternal         | SNPs:  20 0 41                                         |
| 14310_4270       | 1:105896243-106480692  | Gain     | SPX         | Paternal         | Custom-designed microsatellite (14310b)                |
| 16035_1571013001 | 1:144482933-146325557  | Gain     | MPX         | Unknown          | No informative SNPs or microsatellites                 |
| 1952_301         | 1:144500467-146336720  | Gain     | MPX         | Paternal         | SNPs:  24 0 534                                        |
| 8635_201         | 1:144500467-146377870  | Loss     | MPX         | Paternal         | SNPs:  73 0 617                                        |
| 13135_1523       | 1:144838594-146308287  | Gain     | UNK         | Paternal         | SNPs:  121 56 667                                      |
| 6356_5           | 1:2118508-2325536      | Loss     | SPX         | Maternal         | SNPs:  0 11 92                                         |
| 8658_201         | 1:98175622-100923952   | Loss     | SPX         | Maternal         | SNPs:  0 199 1018                                      |
| 9877_204         | 1:98247355-99645560    | Gain     | SPX         | Unknown          | Ambiguous, SNPs:  74 27 488; microsat ?D152739         |
| 5089_5           | 2:102292943-102345460  | Loss     | MPX         | Unknown          | No informative SNPs or microsatellites                 |
| 13082_963        | 2:11712589-11741036    | Gain     | UNK         | Maternal         | Custom-designed microsatellite (13082b)                |
| 4260_1           | 2:119603876-119882278  | Gain     | SPX         | Maternal         | SNPs:  1 26 118 (Griswold et al. 2012) <sup>128</sup>  |
| 13027_353        | 2:144837809-145315383  | Gain     | UNK         | Maternal         | SNPs:  0 40 124                                        |
| 14414_5230       | 2:230486629-230547253  | Loss     | SPX         | Unknown          | No informative SNPs                                    |
| 14068_1180       | 2:50493827-50677835    | Gain     | SPX         | Maternal         | SNPs:  0 15 75                                         |
| 13017_223        | 2:50539877-50730546    | Loss     | UNK         | Paternal         | SNPs:  19 0 89                                         |
| 13216_2383       | 2:50968208-51214171    | Loss     | UNK         | Maternal         | SNPs:  0 10 88                                         |
| 13153_1703       | 2:50990306-51222043    | Loss     | UNK         | Paternal         | Custom-designed microsatellite (13153a)                |
| 13037_463        | 2:51002576-51157742    | Loss     | SPX         | Paternal         | SNPs:  10 0 47                                         |
| 5245_3           | 3:117285007-117477191  | Loss     | MPX         | Unknown          | No informative SNPs                                    |
| 8587_210         | 3:139760896-140127703  | Gain     | UNK         | Paternal         | SNPs:  5 0 105                                         |
| 5220_3           | 3:19127998-19640299    | Gain     | SPX         | Paternal         | SNPs:  38 0 205                                        |
| 8588_201         | 3:195971510-197675831  | Loss     | UNK         | Maternal         | SNPs:  0 35 633                                        |
| 3174_3           | 3:19921061-20096832    | Loss     | MPX         | Maternal         | SNPs:  3 0 72                                          |
| 3616_3           | 3:9474320-9498362      | Loss     | UNK         | Unknown          | No informative SNPs                                    |
| 8677_201         | 4:94659049-95289667    | Gain     | SPX         | Paternal         | SNPs:  28 1 195                                        |
| 6402_3           | 4:98781694-99627129    | Gain     | SPX         | Maternal         | SNPs:  0 28 230                                        |
| 8709_201         | 5:88588170-89505509    | Loss     | SPX         | Paternal         | SNPs:  48 0 249                                        |
| 5386_3           | 6:156785155-158489874  | Loss     | MPX         | Paternal         | SNPs:  115 0 605                                       |
| 6164_3           | 6:160023074-160081618  | Gain     | SPX         | Unknown          | Ambiguous, SNPs:  2 5 23 *                             |
| 8612_201         | 6:162588879-162629938  | Loss     | UNK         | Paternal         | Custom-designed microsatellite (8612a)                 |
| 8404_201         | 6:169136788-170761395  | Loss     | MPX         | Maternal         | SNPs:  0 104 648                                       |
| 5353_3           | 6:33399849-33512042    | Loss     | SPX         | Paternal         | SNPs:  1 0 63 **                                       |
| 18133_302        | 6:69540429-73375020    | Gain     | SPX         | Maternal         | SNPs:  0 182 1516                                      |
| 6248_3           | 6:86352577-86376159    | Loss     | SPX         | Unknown          | No informative SNPs                                    |
| 1960_301         | 7:102699832-102798745  | Loss     | MPX         | Paternal         | D7S2509                                                |
| 5370_3           | 7:153775586-153844747  | Loss     | SPX         | Maternal         | SNPs:  0 6 43                                          |
| 8446_201         | 7:72344426-73782113    | Loss     | SPX         | Maternal         | SNPs:  0 66 615                                        |
| 1142_4           | 8:48631388-48802529    | Gain     | MPX         | Paternal         | SNPs:  3 0 27                                          |
| 6321_3           | 8:65354366-66254869    | Loss     | SPX         | Unknown          | No informative SNPs or microsatellites                 |
| 5290_3           | 8:704383-1521910       | Gain     | SPX         | Paternal         | SNPs:  85 37 361                                       |
| 8500_201         | 8:74692898-74967280    | Loss     | MPX         | Maternal         | SNPs:  0 22 91                                         |
| 14417_5260       | 9:117311405-117727764  | Loss     | SPX         | Paternal         | SNPs:  30 0 141                                        |
| 9756_201         | 9:132572435-132597937  | Loss     | SPX         | Unknown          | No informative SNPs                                    |
| 6259_3           | 9:139516033-140208462  | Loss     | SPX         | Paternal         | SNPs:  23 0 316                                        |
| 6246_4           | 9:9399606-9631169      | Loss     | SPX         | Unknown          | No informative SNPs; no informative microsatellites*** |
| 5032_4           | 9:98998-334508         | Loss     | MPX         | Paternal         | SNPs:  15 0 128                                        |
| 13123_1403       | 9:98998-3682923        | Loss     | UNK         | Paternal         | SNPs:  204 0 1992                                      |
| 18172_302        | 10:34963905-35536952   | Gain     | SPX         | Paternal         | SNPs:  61 0 179                                        |
| 8534_201         | 10:45633089-51564756   | Loss     | SPX         | Maternal         | SNPs:  0 161 1197                                      |
| 14393_5020       | 10:74801551-75278951   | Loss     | SPX         | Paternal         | SNPs:  1 0 225 and patD10S188                          |
| 6240_4           | 11:126633939-132060374 | Loss     | SPX         | Paternal         | SNPs:  351 0 2144                                      |
| 6325_3           | 11:70077507-70506315   | Loss     | SPX         | Maternal         | SNPs:  0 15 138 (Leblond et al 2012) <sup>129</sup>    |
| 6319_3           | 11:70119917-70187872   | Loss     | SPX         | Paternal         | SNPs:  3 0 24                                          |
| 5237_3           | 11:70154458-70220632   | Loss     | SPX         | Maternal         | SNPs:  0 3 15                                          |

| Sample ID        | Chr#:start-end (hg18) | CNV type | Family type | Parent of origin | SNPs: #paternal #maternal total                                            |
|------------------|-----------------------|----------|-------------|------------------|----------------------------------------------------------------------------|
| 6053_3           | 12:54218922-58779615  | Gain     | MPX         | Maternal         | SNPs:  0 241 1766                                                          |
| 5272_3           | 12:98445422-98540678  | Loss     | MPX         | Maternal         | SNPs:  0 5 32                                                              |
| 1050_3           | 14:20279711-20345174  | Gain     | MPX         | Paternal         | SNPs:  14 0 49                                                             |
| 8638_201         | 14:35203374-35369853  | Loss     | UNK         | Paternal         | Custom designed microsatellite (8638b)                                     |
| 4272_1           | 14:63824114-65347410  | Loss     | SPX         | Maternal         | SNPs:  0 47 563 (Griswold et al. 2012) <sup>128</sup>                      |
| 17009_1          | 14:78575296-78596793  | Loss     | SPX         | Unknown          | No informative SNPs or microsatellites                                     |
| 20187_1464001    | 15:18811937-26209270  | Gain     | SPX         | Maternal         | D15S1002, D15S128                                                          |
| 8630_201         | 15:19800798-26209270  | Gain     | MPX         | Paternal         | SNPs:  328 9 2265                                                          |
| 20069_1328001    | 15:20203578-26209270  | Gain     | SPX         | Maternal         | SNPs:  0 467 2230                                                          |
| 17035_1          | 15:20274130-26120360  | Gain     | SPX         | Maternal         | D15S1002, D15S128                                                          |
| 8430_204         | 15:20301669-20777695  | Loss     | SPX         | Paternal         | SNPs:  16 0 187                                                            |
| 13050_593        | 15:21190624-26203954  | Gain     | UNK         | Maternal         | D15S128                                                                    |
| 16040_1571029001 | 15:28450423-30303265  | Loss     | MPX         | Paternal         | SNPs:  56 0 481                                                            |
| 6101_4           | 15:74735339-74929817  | Loss     | MPX         | Paternal         | SNPs:  5 0 36                                                              |
| 8695_201         | 15:81728085-82623936  | Loss     | SPX         | Maternal         | SNPs:  0 27 299                                                            |
| 14181_2940       | 15:82906265-82985247  | Gain     | SPX         | Maternal         | SNPs:  0 4 18                                                              |
| 14070_1230       | 15:91200007-91283004  | Loss     | MPX         | Paternal         | SNPs:  1 0 22                                                              |
| 2204_1           | 16:29466569-30147029  | Loss     | SPX         | Maternal         | SNPs:  0 28 248                                                            |
| 20089_1391001    | 16:29502984-30107306  | Loss     | SPX         | Maternal         | SNPs:  0 21 306                                                            |
| 5068_3           | 16:29502984-30127026  | Loss     | MPX         | Paternal         | SNPs:  5 0 249                                                             |
| 5262_4           | 16:29502984-30210849  | Gain     | SPX         | Paternal         | SNPs:  69 4 249                                                            |
| 4030_1           | 16:29554843-30107306  | Gain     | MPX         | Unknown          | Ambiguous, SNPs:  22 22 253                                                |
| 5359_4           | 16:29554843-30195224  | Loss     | SPX         | Maternal         | SNPs:  0 1 248; no informative microsatellites                             |
| 3439_3           | 17:17156307-18262979  | Loss     | SPX         | Paternal         | SNPs: 184 0 439                                                            |
| 2211_1           | 17:17169258-20101517  | Loss     | SPX         | Paternal         | SNPs:  79 0 927                                                            |
| 5056_4           | 17:34612208-34732327  | Gain     | MPX         | Maternal         | SNPs:  0 1 57; no informative microsatellites                              |
| 8463_202         | 17:52774693-52895975  | Loss     | MPX         | Paternal         | SNPs:  5 0 66                                                              |
| 5444_3           | 17:76953064-77782267  | Gain     | SPX         | Paternal         | SNPs:  20 5 276                                                            |
| 5444_3           | 17:77785939-77849717  | Loss     | SPX         | Paternal         | Custom-designed microsatellite                                             |
| 3477_3           | 18:30280260-30327512  | Loss     | SPX         | Maternal         | Custom-designed microsatellite (20xAC, 22xAC)                              |
| 14331_4450       | 18:72085223-73670156  | Loss     | SPX         | Paternal         | SNPs:  168 0 900                                                           |
| 6358_6           | 19:4548413-5287389    | Loss     | SPX         | Maternal         | SNPs:  0 57 310                                                            |
| 5335_3           | 20:14545734-14948785  | Loss     | SPX         | Maternal         | SNPs:  0 7 151                                                             |
| 5046_3           | 20:8607242-8637441    | Loss     | MPX         | Maternal         | Custom-designed microsatellite (5046)                                      |
| 20180_1704001    | 21:43018846-43444308  | Gain     | SPX         | Maternal         | SNPs:  7 33 225                                                            |
| 3183_7           | 22:17241748-19819918  | Loss     | MPX         | Maternal         | SNPs:  0 184 1251                                                          |
| 8627_201         | 22:17257787-19793730  | Gain     | SPX         | Paternal         | SNPs:  292 94 1350                                                         |
| 17015_1          | 22:17257787-19795780  | Loss     | SPX         | Maternal         | SNPs:  0 190 1444                                                          |
| 4271_1           | 22:17257787-19795780  | Gain     | SPX         | Maternal         | SNPs:  105 249 1311                                                        |
| 8630_201         | 22:32346124-32413987  | Loss     | MPX         | Unknown          | Ambiguous, SNPs:  21 25 291; no informative microsatellites                |
| 2072_1           | 22:45159185-49582267  | Loss     | MPX         | Maternal         | Gonadal mosaicism, two affected sibs (Moessner et al. 2008) <sup>130</sup> |
| 6130_4           | 22:47996161-49512530  | Loss     | SPX         | Paternal         | SNPs:  170 0 875                                                           |
| 14291_4120       | 22:49468716-49485255  | Loss     | SPX         | Paternal         | SNPs:  1 0 5                                                               |
| 16079_1571066001 | 22:49470371-49567383  | Loss     | SPX         | Paternal         | SNPs:  7 0 39                                                              |
| 20013_1075001    | X:153239048-153521797 | Gain     | SPX         | Unknown          | —                                                                          |
| 16076_1571045001 | X:22768481-23133948   | Loss     | SPX         | Unknown          | —                                                                          |

For 85 of 102 *de novo* events it was possible to determine the parent-of-origin from SNPs or microsatellite genotypes. Of the 85 *de novo* CNVs where parental origin could be assigned, 45 (53%) were paternally-derived and 40 (47%) were maternally-derived. These findings do not confirm the results from Hehir-Kwa et al.<sup>131</sup> of an increased rate of paternally-derived *de novo* events. Furthermore, paternal age was not found to be increased in fathers of ASD probands (with or without *de novo* CNVs) when compared to fathers of controls from that study (Table S5H). Parental bias was also not observed when we separately considered *de novo* events by type of CNV (pathogenic, uncertain significance, intergenic/intronic), mechanism of causality (mediated/flanked by segmental duplications or not) and type of family (simplex or multiplex).

\* Similar results when using a larger 500 kb-flanking SNP window: ambiguous (SNPs: |8|17|203)

\*\* Similar results when using a larger 500 kb-flanking SNP window: pat (SNPs: |1|0|369)

\*\*\* When using a 500 kb-flanking window: ambiguous (SNPs: |0|1|208)

Abbreviations: microsat, microsatellite marker; MPX, multiplex; SPX, simplex; UNK, unknown family type.

## Tables S5B-S5H. Parent of origin of *de novo* CNVs – breakdown by family type and CNV characteristics

**Table S5B. Breakdown by type of CNV**

|                         | Paternal | Maternal | Total |
|-------------------------|----------|----------|-------|
| Pathogenic              | 23       | 20       | 43    |
| Uncertain               | 20       | 19       | 39    |
| Intergenic/<br>intronic | 2        | 1        | 3     |
| Total                   | 45       | 40       | 85    |

Classification according to **Tables S5A and S7A**

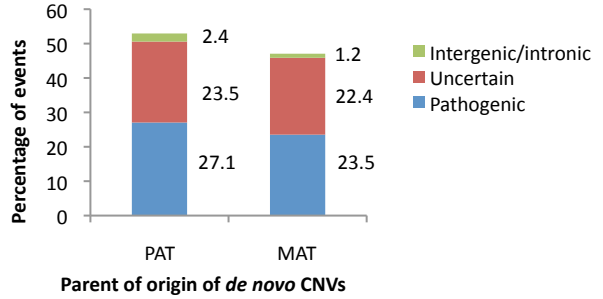

**Table S5C. Breakdown by type of CNV, including large chromosomal abnormalities**

|                         | Paternal | Maternal | Total |
|-------------------------|----------|----------|-------|
| Pathogenic              | 25       | 22       | 47    |
| Uncertain               | 20       | 19       | 39    |
| Intergenic/<br>intronic | 2        | 1        | 3     |
| Total                   | 47       | 42       | 88    |

Classification according to **Tables S5A and S7A**

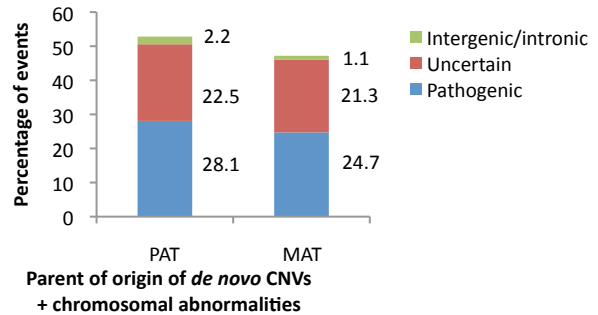

**Table S5D. Breakdown by mechanism (CNV flanked or not by segmental duplications)**

|                         | Paternal |       | Maternal |       | Total |
|-------------------------|----------|-------|----------|-------|-------|
|                         | SD       | no SD | SD       | no SD |       |
| Pathogenic              | 10       | 13    | 13       | 7     | 43    |
| Uncertain               | 1        | 19    | 1        | 18    | 39    |
| Intergenic/<br>intronic | 0        | 2     | 0        | 1     | 3     |
| Total                   | 11       | 34    | 14       | 26    | 85    |

Classification according to **Tables S5A and S7A**  
SD, segmental duplication

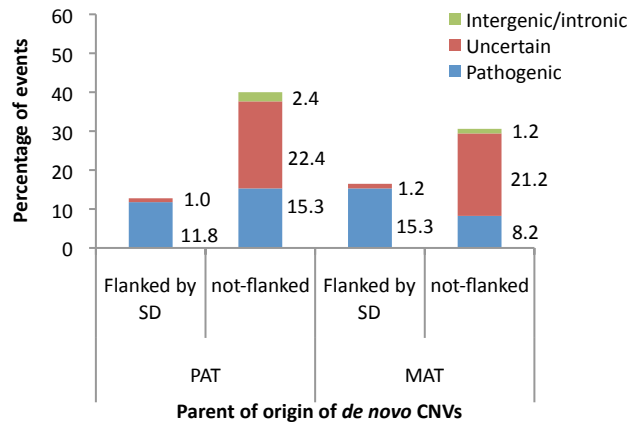



**Table S5E. Breakdown of CNVs by type of family**

|             | # Probands without <i>de novo</i> events | # Probands with <i>de novo</i> events | Total | %   |
|-------------|------------------------------------------|---------------------------------------|-------|-----|
| AGP SPX     | 1142                                     | 59                                    | 1201  | 4.9 |
| AGP MPX     | 600                                      | 26                                    | 626   | 4.2 |
| AGP Unknown | 256                                      | 13                                    | 269   | 4.8 |
| Total       | 1998                                     | 98                                    | 2096  | 4.7 |
| SSC         | 1059                                     | 65                                    | 1124  | 5.8 |

Number of simplex (SPX) and multiplex (MPX) families after QC is 1201 and 626, respectively. SSC, Simons Simplex Collection<sup>132</sup>

**Table S5F. Breakdown of *de novo* events by type of family**

|         | Paternal | Maternal | Total |
|---------|----------|----------|-------|
| AGP SPX | 23       | 26       | 49    |
| AGP MPX | 13       | 9        | 22    |
| SSC     | 27       | 34       | 61    |
| Total   | 63       | 69       | 132   |

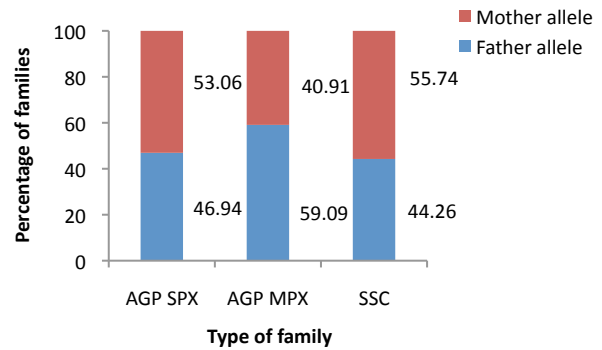

**Table S5G. Breakdown of *de novo* CNVs by size in different family types**

|         | <30 kb | 30 kb-500 kb | 500 kb-1 Mb | >1 Mb |
|---------|--------|--------------|-------------|-------|
| AGP SPX | 4      | 23           | 15          | 17    |
| AGP MPX | 0      | 14           | 2           | 10    |
| Total   | 4      | 37           | 17          | 27    |

Average CNV size is 1,199,751 bp for SPX, 1,180,129 bp for MPX, and 1,041,851 bp for families classified as unknown.

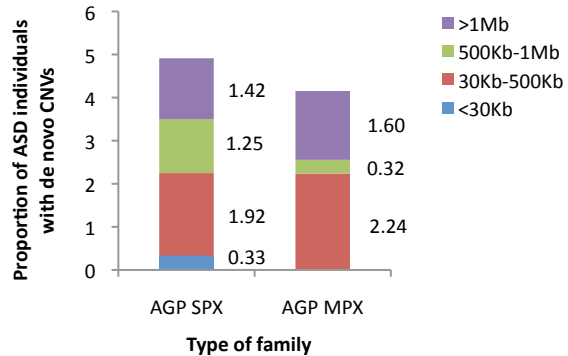

**Table S5H. Breakdown of *de novo* CNVs by paternal age**

|                                                                       | # Fathers in group* | Median paternal age ± SD |
|-----------------------------------------------------------------------|---------------------|--------------------------|
| ASD without <i>de novo</i> CNVs                                       | 1659                | 32.33 ± 5.74             |
| ASD with <i>de novo</i> CNVs                                          | 76                  | 32.17 ± 6.57             |
| ASD with <i>de novo</i> CNVs, paternal in origin, with flanking SD    | 6                   | 33.75 ± 6.03             |
| ASD with <i>de novo</i> CNVs, paternal in origin, without flanking SD | 24                  | 33.71 ± 6.08             |

\*45 *de novo* CNVs were paternally derived from 43 fathers (2 affected individuals had 2 paternally-derived *de novo* CNVs each), and parental age was available for 30 of them. The average maternal and paternal age at childbirth in our group of rare *de novo* CNVs was 29.6 and 32.2 years, respectively (76/99 had information on parental age). These age ranges were similar to parental ages at childbirth in the control cohort used by Hehir-Kwa et al.<sup>131</sup> (31.4 and 32.1 years, respectively).

## Tables S6A-S6D. List of genes and loci implicated in ASD and ID

Table S6A. Genes implicated in ASD

|    | Gene            | Chr. band    | Disorder                                                                                                                                                 | Inheritance pattern |
|----|-----------------|--------------|----------------------------------------------------------------------------------------------------------------------------------------------------------|---------------------|
| 1  | <i>POMGNT1</i>  | 1p34.1       | Muscle-eye-brain disease                                                                                                                                 | AR                  |
| 2  | <i>RPE65</i>    | 1p31.3       | Leber congenital amaurosis                                                                                                                               | AR                  |
| 3  | <i>DPYD</i>     | 1p21.3       | Dihydropyrimidine dehydrogenase deficiency                                                                                                               | AR                  |
| 4  | <i>NRXN1</i>    | 2p16.3       | Disrupted in ASD, ID, schizophrenia (dominant); Pitt-Hopkins-like syndrome 2 (recessive)                                                                 | AD/AR               |
| 5  | <i>NPHP1</i>    | 2q13         | Joubert syndrome type 4, nephronophthisis                                                                                                                | AR                  |
| 6  | <i>MBD5</i>     | 2q23.1       | Autosomal dominant ID, 2q23.1 microdeletion syndrome                                                                                                     | AD                  |
| 7  | <i>SCN1A</i>    | 2q24.3       | Severe myoclonic epilepsy of infancy (Dravet syndrome)                                                                                                   | AD                  |
| 8  | <i>SCN2A</i>    | 2q24.3       | Benign familial neonatal-infantile seizures, intractable childhood epilepsy                                                                              | AD                  |
| 9  | <i>SATB2</i>    | 2q33.1       | Cleft palate and ID; implicated in the 2q33.1 microdeletion syndrome                                                                                     | AD                  |
| 10 | <i>BTBD</i>     | 3p24.3       | Biotinidase deficiency                                                                                                                                   | AR                  |
| 11 | <i>FOXP1</i>    | 3p14.1       | Non-syndromic ID with language impairment and ASD                                                                                                        | AD                  |
| 12 | <i>PRSS12</i>   | 4q26         | Autosomal recessive non-syndromic ID                                                                                                                     | AR                  |
| 13 | <i>NIPBL</i>    | 5p13.2       | Cornelia de Lange syndrome                                                                                                                               | AD                  |
| 14 | <i>MEF2C</i>    | 5q14.3       | ID, stereotypic movements, epilepsy, and/or cerebral malformations; 5q14.3 microdeletion syndrome                                                        | AD                  |
| 15 | <i>ALDH7A1</i>  | 5q23.2       | Pyridoxine-dependent epilepsy                                                                                                                            | AR                  |
| 16 | <i>NSD1</i>     | 5q35.2-q35.3 | Sotos syndrome                                                                                                                                           | AD                  |
| 17 | <i>ALDH5A1</i>  | 6p22.2       | Succinic semialdehyde dehydrogenase deficiency                                                                                                           | AR                  |
| 18 | <i>SYNGAP1</i>  | 6p21.32      | Autosomal dominant ID                                                                                                                                    | AD                  |
| 19 | <i>AHI1</i>     | 6q23.3       | Joubert syndrome 3                                                                                                                                       | AR                  |
| 20 | <i>PEX7</i>     | 6q23.3       | Refsum disease, Rhizomelic chondrodysplasia punctata, type 1                                                                                             | AR                  |
| 21 | <i>ARID1B</i>   | 6q25.3       | ID, speech impairment, minor anomalies and variable corpus callosum abnormalities; Coffin-Siris syndrome                                                 | AD                  |
| 22 | <i>HOXA1</i>    | 7p15.2       | HOXA1 syndrome, Bosley-Salih-Alorainy variant                                                                                                            | AR                  |
| 23 | <i>BRAF</i>     | 7q34         | Cardio-facio-cutaneous syndrome                                                                                                                          | AD                  |
| 24 | <i>CNTNAP2</i>  | 7q35-q36.1   | Cortical dysplasia-focal epilepsy syndrome, Pitt-Hopkins-like syndrome 1 (recessive); the clinical significance of the disruption of 1 allele is unknown | AR                  |
| 25 | <i>HGSNAT</i>   | 8p11.21      | Mucopolysaccharidosis type IIIC (Sanfilippo syndrome C)                                                                                                  | AR                  |
| 26 | <i>TUSC3</i>    | 8p22         | Autosomal recessive non-syndromic ID                                                                                                                     | AR                  |
| 27 | <i>CHD7</i>     | 8q12.2       | CHARGE syndrome                                                                                                                                          | AD                  |
| 28 | <i>VPS13B</i>   | 8q22.2       | Cohen syndrome                                                                                                                                           | AR                  |
| 29 | <i>SMARCA2</i>  | 9p24.3       | Nicolaides-Baraitser syndrome; Coffin-Siris syndrome                                                                                                     | AD                  |
| 30 | <i>STXBP1</i>   | 9q34.11      | Non-syndromic epilepsy, ID and autism; early infantile epileptic encephalopathy                                                                          | AD                  |
| 31 | <i>POMT1</i>    | 9q34.13      | Limb-girdle muscular dystrophy with ID; Walker-Warburg syndrome                                                                                          | AR                  |
| 32 | <i>TSC1</i>     | 9q34.13      | Tuberous sclerosis                                                                                                                                       | AD                  |
| 33 | <i>EHMT1</i>    | 9q34.3       | Kleefstra syndrome (9q subtelomeric deletion syndrome)                                                                                                   | AD                  |
| 34 | <i>PTEN</i>     | 10q23.31     | PTEN hamartoma-tumor syndrome, ID and ASD with macrocephaly                                                                                              | AD                  |
| 35 | <i>FGFR2</i>    | 10q26.13     | Apert syndrome                                                                                                                                           | AD                  |
| 36 | <i>HRAS</i>     | 11p15.5      | Costello syndrome                                                                                                                                        | AD                  |
| 37 | <i>IGF2</i>     | 11p15.5      | Aberrant imprinting of <i>IGF2</i> is associated with Beckwith-Wiedemann syndrome and Silver-Russell syndrome                                            | AD                  |
| 38 | <i>KCNJ11</i>   | 11p15.1      | DEND syndrome (developmental delay, epilepsy, and neonatal diabetes)                                                                                     | AD                  |
| 39 | <i>SHANK2</i>   | 11q13.3      | Non-syndromic ID and ASD                                                                                                                                 | AD                  |
| 40 | <i>DHCR7</i>    | 11q13.4      | Smith-Lemli-Opitz syndrome                                                                                                                               | AR                  |
| 41 | <i>FOLR1</i>    | 11q13.4      | Cerebral folate transport deficiency                                                                                                                     | AR                  |
| 42 | <i>HEPACAM</i>  | 11q24.2      | Megalencephalic leukoencephalopathy with subcortical cysts (recessive); leukodystrophy and macrocephaly (dominant)                                       | AR/AD               |
| 43 | <i>CACNA1C</i>  | 12p13.33     | Timothy syndrome                                                                                                                                         | AD                  |
| 44 | <i>GRIN2B</i>   | 12p13.1      | Autosomal dominant ID                                                                                                                                    | AD                  |
| 45 | <i>KRAS</i>     | 12p12.1      | Cardio-facio-cutaneous syndrome                                                                                                                          | AD                  |
| 46 | <i>SCN8A</i>    | 12q13.13     | Early infantile epileptic encephalopathy                                                                                                                 | AD                  |
| 47 | <i>GNS</i>      | 12q14.3      | Mucopolysaccharidosis type IIID (Sanfilippo disease D)                                                                                                   | AR                  |
| 48 | <i>BBS10</i>    | 12q21.2      | Bardet-Biedl syndrome                                                                                                                                    | AR                  |
| 49 | <i>CEP290</i>   | 12q21.32     | Joubert syndrome 5, Leber congenital amaurosis, Bardet-Biedl syndrome, Meckel syndrome                                                                   | AR                  |
| 50 | <i>PAH</i>      | 12q23.2      | Phenylketonuria                                                                                                                                          | AR                  |
| 51 | <i>PTPN11</i>   | 12q24.13     | Noonan syndrome                                                                                                                                          | AD                  |
| 52 | <i>CHD8</i>     | 14q11.2      | Autosomal dominant ASD and ID                                                                                                                            | AD                  |
| 53 | <i>FOXP1</i>    | 14q12        | Congenital variant of Rett syndrome                                                                                                                      | AD                  |
| 54 | <i>L2HGDH</i>   | 14q22.1      | L-2-hydroxyglutaric aciduria                                                                                                                             | AR                  |
| 55 | <i>UBE3A</i>    | 15q11.2      | Angelman syndrome                                                                                                                                        | AD                  |
| 56 | <i>SPRED1</i>   | 15q14        | Neurofibromatosis type 1-like syndrome (Legius syndrome)                                                                                                 | AD                  |
| 57 | <i>GATM</i>     | 15q21.1      | Arginine:glycine amidinotransferase (AGAT) deficiency                                                                                                    | AR                  |
| 58 | <i>MAP2K1</i>   | 15q22.31     | Cardio-facio-cutaneous syndrome                                                                                                                          | AD                  |
| 59 | <i>TSC2</i>     | 16p13.3      | Tuberous sclerosis                                                                                                                                       | AD                  |
| 60 | <i>CREBBP</i>   | 16p13.3      | Rubinstein-Taybi syndrome                                                                                                                                | AD                  |
| 61 | <i>SRCAP</i>    | 16p11.2      | Floating-Harbor syndrome                                                                                                                                 | AD                  |
| 62 | <i>BCKDK</i>    | 16p11.2      | Autosomal recessive autism, ID & epilepsy/abnormal EEG                                                                                                   | AR                  |
| 63 | <i>RPGRIP1L</i> | 16q12.2      | Joubert syndrome 7, Meckel syndrome, COACH syndrome                                                                                                      | AR                  |

|     | Gene            | Chr. band      | Disorder                                                                                                                     | Inheritance pattern   |
|-----|-----------------|----------------|------------------------------------------------------------------------------------------------------------------------------|-----------------------|
| 64  | <i>ANKRD11</i>  | 16q24.3        | KBG syndrome; 16q24.3 microdeletion syndrome                                                                                 | AD                    |
| 65  | <i>YWHAE</i>    | 17p13.3        | Miller-Dieker syndrome                                                                                                       | AD                    |
| 66  | <i>PAFAH1B1</i> | 17p13.3        | Isolated lissencephaly, Miller-Dieker syndrome                                                                               | AD                    |
| 67  | <i>GUCY2D</i>   | 17p13.1        | Leber congenital amaurosis                                                                                                   | AR                    |
| 68  | <i>RAI1</i>     | 17p11.2        | Smith-Magenis syndrome (deletion, mutation), Potocki-Lupski syndrome (duplication)                                           | AD                    |
| 69  | <i>RNF135</i>   | 17q11.2        | Overgrowth syndrome; haploinsufficiency of <i>RNF135</i> contributes to the phenotype of the NF1 microdeletion syndrome      | AD                    |
| 70  | <i>NF1</i>      | 17q11.2        | Neurofibromatosis type 1                                                                                                     | AD                    |
| 71  | <i>NAGLU</i>    | 17q21.31       | Mucopolysaccharidosis type IIIB (Sanfilippo syndrome B)                                                                      | AR                    |
| 72  | <i>SGSH</i>     | 17q25.3        | Sanfilippo syndrome A (mucopolysaccharidosis III A)                                                                          | AR                    |
| 73  | <i>SETBP1</i>   | 18q12.3        | Haploinsufficiency of <i>SETBP1</i> causes the core clinical features of the del(18)(q12.2q21.1) syndrome                    | AD                    |
| 74  | <i>SMAD4</i>    | 18q21.2        | Myhre syndrome                                                                                                               | AD                    |
| 75  | <i>TCF4</i>     | 18q21.2        | Pitt-Hopkins syndrome                                                                                                        | AD                    |
| 76  | <i>NFIX</i>     | 19p13.13       | Sotos-like overgrowth syndrome, Marshall-Smith syndrome                                                                      | AD                    |
| 77  | <i>GAMT</i>     | 19p13.3        | Guanidine acetate methyltransferase (GAMT) deficiency                                                                        | AR                    |
| 78  | <i>DMPK</i>     | 19q13.32       | Myotonic dystrophy type 1 (Steinert disease)                                                                                 | AD                    |
| 79  | <i>MKKS</i>     | 20p12.2        | Bardet-Biedl syndrome                                                                                                        | AR                    |
| 80  | <i>DYRK1A</i>   | 21q22.13       | Autosomal dominant ID                                                                                                        | AD                    |
| 81  | <i>ADSL</i>     | 22q13.1        | Adenylosuccinate lyase deficiency                                                                                            | AR                    |
| 82  | <i>SHANK3</i>   | 22q13.33       | Phelan-mcdermid syndrome (22q13 deletion syndrome)                                                                           | AD                    |
| 83  | <i>NLGN4X</i>   | Xp22.31-p22.32 | Non-syndromic X-linked ID and ASD                                                                                            | XLR                   |
| 84  | <i>MID1</i>     | Xp22.2         | Opitz syndrome (Opitz/BBB syndrome)                                                                                          | XLR                   |
| 85  | <i>AP1S2</i>    | Xp22.2         | Syndromic X-linked ID, Fried type; non-syndromic X-linked ID                                                                 | XLR                   |
| 86  | <i>NHS</i>      | Xp22.13        | Nance-Horan syndrome                                                                                                         | XLD                   |
| 87  | <i>CDKL5</i>    | Xp22.13        | Early infantile epileptic encephalopathy                                                                                     | XLD                   |
| 88  | <i>PTCHD1</i>   | Xp22.11        | Non-syndromic X-linked ID and ASD                                                                                            | XLR                   |
| 89  | <i>ARX</i>      | Xp21.3         | X-linked lissencephaly and abnormal genitalia, West syndrome, Partington syndrome, non-syndromic X-linked ID                 | XLR                   |
| 90  | <i>IL1RAPL1</i> | Xp21.2-p21.3   | Non-syndromic X-linked ID and ASD                                                                                            | XLR                   |
| 91  | <i>DMD</i>      | Xp21.1-21.2    | Muscular dystrophy, Duchenne and Becker types                                                                                | XLR                   |
| 92  | <i>OTC</i>      | Xp11.4         | Ornithine transcarbamylase deficiency                                                                                        | XLD/XLR               |
| 93  | <i>CASK</i>     | Xp11.4         | Syndromic and non-syndromic X-linked ID                                                                                      | XLD                   |
| 94  | <i>NDP</i>      | Xp11.3         | Norrie disease                                                                                                               | XLR                   |
| 95  | <i>KDM6A</i>    | Xp11.3         | Kabuki syndrome                                                                                                              | XLD                   |
| 96  | <i>SYN1</i>     | Xp11.23        | X-linked epilepsy and ID                                                                                                     | XLR                   |
| 97  | <i>FTSJ1</i>    | Xp11.23        | Non-syndromic X-linked ID                                                                                                    | XLR                   |
| 98  | <i>PQBP1</i>    | Xq11.23        | Renpenning syndrome, non-syndromic ID                                                                                        | XLR                   |
| 99  | <i>CACNA1F</i>  | Xp11.23        | X-linked incomplete congenital stationary night blindness                                                                    | XLR                   |
| 100 | <i>KDM5C</i>    | Xp11.22        | Syndromic X-linked ID, Claes-Jensen type; non-syndromic X-linked ID                                                          | XLR                   |
| 101 | <i>IQSEC2</i>   | Xp11.22        | Non-syndromic X-linked ID                                                                                                    | XLD                   |
| 102 | <i>SMC1A</i>    | Xp11.22        | Cornelia de Lange syndrome                                                                                                   | XLD                   |
| 103 | <i>HSD17B10</i> | Xp11.22        | 17-beta-hydroxysteroid dehydrogenase X deficiency, X-linked syndromic ID with choreoathetosis and abnormal behavior          | XLD                   |
| 104 | <i>PHF8</i>     | Xp11.22        | Siderius-Hamel syndrome                                                                                                      | XLR                   |
| 105 | <i>FGD1</i>     | Xp11.22        | Aarskog-Scott syndrome, non-syndromic X-linked ID                                                                            | XLR                   |
| 106 | <i>OPHN1</i>    | Xq12           | X-linked ID with cerebellar hypoplasia and distinctive facial appearance                                                     | XLR                   |
| 107 | <i>MED12</i>    | Xq13.1         | Lujan-Fryns syndrome, Opitz-Kaveggia syndrome                                                                                | XLR                   |
| 108 | <i>NLGN3</i>    | Xq13.1         | Non-syndromic X-linked ID and ASD                                                                                            | XLR                   |
| 109 | <i>ATRX</i>     | Xq21.1         | Alpha-thalassemia/mental retardation syndrome, non-syndromic X-linked ID                                                     | XLD                   |
| 110 | <i>PCDH19</i>   | Xq22.1         | Female-limited epilepsy with ID, early infantile epileptic encephalopathy                                                    | XL - affected females |
| 111 | <i>ACSL4</i>    | Xq22.3         | Non-syndromic X-linked ID                                                                                                    | XLD                   |
| 112 | <i>DCX</i>      | Xq22.3         | Type 1 lissencephaly                                                                                                         | XLD                   |
| 113 | <i>UPF3B</i>    | Xq24           | Non-syndromic X-linked ID, Opitz-Kaveggia/Lujan-Fryns phenotype                                                              | XLR                   |
| 114 | <i>LAMP2</i>    | Xq24           | Danon disease                                                                                                                | XLD                   |
| 115 | <i>GRIA3</i>    | Xq25           | Syndromic X-linked ID, Wu type; non-syndromic X-linked ID                                                                    | XLR                   |
| 116 | <i>OCRL</i>     | Xq25           | Lowe syndrome                                                                                                                | XLR                   |
| 117 | <i>PHF6</i>     | Xq26.2         | Borjeson-Forsman-Lehmann syndrome                                                                                            | XLR                   |
| 118 | <i>SLC9A6</i>   | Xq26.3         | Syndromic X-linked ID, Christianson type                                                                                     | XLD?                  |
| 119 | <i>FMR1</i>     | Xq27.3         | Fragile X syndrome                                                                                                           | XLD                   |
| 120 | <i>AFF2</i>     | Xq28           | Fragile X mental retardation 2                                                                                               | XLR                   |
| 121 | <i>SLC6A8</i>   | Xq28           | Creatine deficiency syndrome, non-syndromic X-linked ID                                                                      | XLR                   |
| 122 | <i>L1CAM</i>    | Xq28           | MASA (mental retardation, aphasia, shuffling gait, and adducted thumbs) syndrome                                             | XLR                   |
| 123 | <i>MECP2</i>    | Xq28           | Rett syndrome, non-syndromic X-linked ID (mutation, deletion; XL dominant); <i>MECP2</i> duplication syndrome (XL recessive) | XLD/XLR               |
| 124 | <i>RAB39B</i>   | Xq28           | Non-syndromic X-linked ID                                                                                                    | XLR                   |

Abbreviations: AD, autosomal dominant; AR, autosomal recessive; ASD, autism spectrum disorder; ID, intellectual disability; XL, X-linked; XLD, X-linked dominant; XLR, X-linked recessive

**Table S6B. Loci implicated in ASD**

|    | Disorder                                                                                                         | Chr. band       | Start (hg18) | End (hg18)  | Genes involved                                                                                                                                           | Inheritance pattern |
|----|------------------------------------------------------------------------------------------------------------------|-----------------|--------------|-------------|----------------------------------------------------------------------------------------------------------------------------------------------------------|---------------------|
| 1  | 1p36 deletion syndrome                                                                                           | 1p36.32-p36.33  | 823,946      | 5,308,621   | contiguous gene syndrome                                                                                                                                 | AD                  |
| 2  | 1q21.1 deletion/duplication syndrome                                                                             | 1q21.1          | 145,044,110  | 145,861,130 | ?                                                                                                                                                        | AD                  |
| 3  | 1q41q42 microdeletion syndrome                                                                                   | 1q41q42         | 219,500,000  | 223,000,000 | ?                                                                                                                                                        | AD                  |
| 4  | 1q43q44 microdeletion syndrome                                                                                   | 1q43q44         | 238,000,000  | 247,249,718 | ?                                                                                                                                                        | AD                  |
| 5  | 2p16.1p15 microdeletion syndrome                                                                                 | 2p16.1p15       | 57,595,300   | 61,591,838  | ?                                                                                                                                                        | AD                  |
| 6  | 2q13 deletion/duplication                                                                                        | 2q13            | 111,158,601  | 112,782,250 | ?                                                                                                                                                        | AD                  |
| 7  | 2q23.1 microdeletion syndrome                                                                                    | 2q23.1          | 148,932,242  | 148,987,514 | <i>MBD5</i>                                                                                                                                              | AD                  |
| 8  | 2q33.1 deletion syndrome                                                                                         | 2q32.3-q33.2    | 196,633,334  | 204,915,185 | <i>SATB2</i> (maybe other gene(s) contribute too)                                                                                                        | AD                  |
| 9  | 2q37 deletion syndrome (brachydactyly-mental retardation syndrome)                                               | 2q37.3          | 239,619,630  | 242,579,273 | <i>HDAC4</i> (other distal gene(s) contribute too)                                                                                                       | AD                  |
| 10 | 3q13.31 microdeletion syndrome                                                                                   | 3q12.3q21.3     | 115,335,356  | 115,916,848 | ?                                                                                                                                                        | AD                  |
| 11 | 3q29 microdeletion/microduplication syndrome                                                                     | 3q29            | 197,240,451  | 198,829,062 | ? (candidates: <i>PAK2</i> and <i>DLG1</i> )                                                                                                             | AD                  |
| 12 | Wolf-Hirschhorn syndrome                                                                                         | 4p16.3          | 62,448       | 2,297,002   | contiguous gene syndrome                                                                                                                                 | AD                  |
| 13 | 4q21 microdeletion syndrome                                                                                      | 4q21.21-q21.22  | 82,228,875   | 83,182,488  | ?                                                                                                                                                        | AD                  |
| 14 | Cri du Chat syndrome (5p deletion)                                                                               | 5p15.2-p15.33   | 90,693       | 11,400,262  | ?                                                                                                                                                        | AD                  |
| 15 | 5q14.3 microdeletion syndrome                                                                                    | 5q14.3          | 88,049,814   | 88,235,678  | <i>MEF2C</i>                                                                                                                                             | AD                  |
| 16 | Sotos syndrome (deletion), 5q35.2q35.3 duplication                                                               | 5q35.2-q35.3    | 175,661,584  | 176,946,567 | <i>NSD1</i>                                                                                                                                              | AD                  |
| 17 | 6p subtelomere deletion syndrome                                                                                 | 6p25            | 100,000      | 3,000,000   | ? ( <i>FOXC1</i> involved in ophthalmologic findings)                                                                                                    | AD                  |
| 18 | Williams syndrome (deletion), 7q11.23 duplication syndrome                                                       | 7q11.23         | 72,382,390   | 73,780,449  | contiguous gene syndrome                                                                                                                                 | AD                  |
| 19 | 8p23.1 deletion/duplication syndrome                                                                             | 8p23.1          | 8,156,705    | 11,803,128  | ? ( <i>GATA4</i> involved in heart defects)                                                                                                              | AD                  |
| 20 | 8q21.11 microdeletion syndrome                                                                                   | 8q21.11         | 77,389,019   | 77,928,794  | ?                                                                                                                                                        | AD                  |
| 21 | Kleefstra syndrome (9q subtelomeric deletion syndrome)                                                           | 9q34.3          | 139,523,184  | 140,273,252 | <i>EHMT1</i>                                                                                                                                             | AD                  |
| 22 | 10p14p15 deletion syndrome                                                                                       | 10p14-p15.1     | 4,700,001    | 10,600,000  | ? ( <i>GATA3</i> involved in hypoparathyroidism, deafness, renal disease)                                                                                | AD                  |
| 23 | 10p12p11 microdeletion                                                                                           | 10p12.31p11.21  | 28,833,195   | 29,138,742  | ?                                                                                                                                                        | AD                  |
| 24 | 10q22-q23 deletion                                                                                               | 10q22.3-q23.2   | 81,682,644   | 88,931,994  | ?                                                                                                                                                        | AD                  |
| 25 | Distal 10q deletion syndrome                                                                                     | 10q26.2-q26.3   | 128,000,000  | 135,374,737 | ?                                                                                                                                                        | AD                  |
| 26 | 11p15.5 duplication: Beckwith-Wiedemann/Silver-Russell syndromes                                                 | 11p15.4-p15.5   | 1,970,000    | 2,870,000   | <i>H19</i> , <i>IGF2</i>                                                                                                                                 | AD                  |
| 27 | WAGR syndrome (11p13 deletion syndrome)                                                                          | 11p13           | 31,760,085   | 32,467,564  | ?                                                                                                                                                        | AD                  |
| 28 | Potocki-Shaffer syndrome (11p11.2 deletion syndrome)                                                             | 11p11.2         | 43,941,853   | 46,021,136  | <i>PHF21A</i> ( <i>EXT2</i> and <i>ALX4</i> involved in bone defects)                                                                                    | AD                  |
| 29 | Jacobsen syndrome (11q deletion syndrome)                                                                        | 11q23.3-qter    | 115,400,001  | 134,452,384 | ?                                                                                                                                                        | AD                  |
| 30 | 12q14 microdeletion syndrome                                                                                     | 12q14           | 63,358,186   | 66,931,792  | ? ( <i>HMG2A</i> involved in short stature)                                                                                                              | AD                  |
| 31 | Terminal deletion 14q syndrome                                                                                   | 14q32.31-q32.33 | 101,500,000  | 105,000,000 | ?                                                                                                                                                        | AD                  |
| 32 | Angelman syndrome (maternal deletion), Prader-Willi syndrome (paternal deletion), 15q11-q13 duplication syndrome | 15q11.2-q13.1   | 21,309,483   | 26,230,781  | Angelman: maternal <i>UBE3A</i> ; Prader-Willi: paternally expressed genes (HBII-85 snoRNA cluster; <i>SNURF-SNRPN</i> , <i>NDN</i> and <i>MAGEL2</i> ?) | AD                  |
| 33 | 15q13.3 deletion syndrome (duplication = uncertain significance)                                                 | 15q13.2-q13.3   | 28,924,396   | 30,232,700  | <i>CHRNA7</i>                                                                                                                                            | AD                  |
| 34 | 15q24 microdeletion syndrome                                                                                     | 15q24.1-q24.2   | 72,164,227   | 73,949,332  | ?                                                                                                                                                        | AD                  |
| 35 | Distal 15q25.2q25.3 microdeletion                                                                                | 15q25.2q25.3    | 82,944,098   | 83,484,862  | ?                                                                                                                                                        | AD                  |
| 36 | 15q26 overgrowth syndrome                                                                                        | 15q26.3         | 97,175,493   | 100,218,756 | <i>IGF1R</i>                                                                                                                                             | AD                  |
| 37 | Rubinstein-Taybi syndrome (deletion), 16p13.3 duplication syndrome                                               | 16p13.3         | 3,715,057    | 3,870,122   | <i>CREBBP</i>                                                                                                                                            | AD                  |
| 38 | 16p13.11 microdeletion syndrome (duplication = uncertain significance)                                           | 16p13.11        | 15,411,955   | 16,199,769  | ?                                                                                                                                                        | AD                  |
| 39 | 16p11.2-p12.2 microdeletion/microduplication syndrome                                                            | 16p11.2-p12.2   | 21,521,457   | 28,949,693  | ?                                                                                                                                                        | AD                  |
| 40 | 16p11.2 microdeletion/microduplication syndrome                                                                  | 16p11.2         | 29,557,497   | 30,107,356  | ?                                                                                                                                                        | AD                  |
| 41 | Miller-Dieker syndrome/isolated lissencephaly (deletion), 17p13.3 microduplication                               | 17p13.3         | 1,129,706    | 2,535,659   | <i>PAFAH1B1</i> , <i>YWHAE</i>                                                                                                                           | AD                  |
| 42 | Smith-Magenis syndrome (deletion), Potocki-Lupski syndrome (duplication)                                         | 17p11.2         | 16,697,836   | 20,160,243  | <i>RAI1</i>                                                                                                                                              | AD                  |
| 43 | NF1 microdeletion/microduplication syndrome                                                                      | 17q11.2         | 26,186,948   | 27,242,780  | <i>NF1</i> ( <i>RNF135</i> contributes to the overgrowth, facial dysmorphism and ID)                                                                     | AD                  |
| 44 | 17q12 deletion syndrome (renal cysts and diabetes syndrome), 17q12 duplication syndrome                          | 17q12           | 31,930,169   | 33,323,031  | ? ( <i>HNF1B</i> involved in renal cysts and diabetes syndrome)                                                                                          | AD                  |
| 45 | Koolen-De Vries syndrome (17q21.31 microdeletion syndrome), 17q21.31 microduplication syndrome                   | 17q21.31        | 41,060,949   | 41,544,225  | <i>KANSL1</i>                                                                                                                                            | AD                  |
| 46 | del(18)(q12.2q21.1) syndrome                                                                                     | 18q12.2q21.1    | 39,890,000   | 41,700,000  | <i>SETBP1</i>                                                                                                                                            | AD                  |
| 47 | Down syndrome (trisomy 21)                                                                                       | whole chr 21    | 1            | 46,944,323  | contiguous gene syndrome                                                                                                                                 | AD                  |

|    | Disorder                                                                                     | Chr. band       | Start (hg18) | End (hg18)  | Genes involved                                                                              | Inheritance pattern |
|----|----------------------------------------------------------------------------------------------|-----------------|--------------|-------------|---------------------------------------------------------------------------------------------|---------------------|
| 48 | 22q11.2 deletion syndrome (velocardiofacial/DiGeorge syndrome), 22q11.2 duplication syndrome | 22q11.21-q11.22 | 17,041,725   | 18,691,904  | contiguous gene syndrome, <i>TBX1</i> is responsible for most of the physical malformations | AD                  |
| 49 | Phelan-McDermid syndrome (22q13 deletion syndrome), 22q13 duplication                        | 22q13.33        | 49,392,382   | 49,525,811  | <i>SHANK3</i>                                                                               | AD                  |
| 50 | Xq28 duplication syndrome ( <i>MECP2</i> duplication syndrome)                               | Xq28            | 152,403,094  | 153,044,193 | <i>MECP2</i>                                                                                | XLR                 |
| 51 | Turner syndrome (X0)                                                                         | whole chr X     | 1            | 154,913,754 | contiguous gene syndrome                                                                    |                     |
| 52 | Klinefelter syndrome (XXY)                                                                   | whole chr X     | 1            | 154,913,754 | contiguous gene syndrome                                                                    |                     |
| 53 | YYY syndrome                                                                                 | whole chr Y     | 1            | 57,772,954  | contiguous gene syndrome                                                                    |                     |
| 54 | XXYY syndrome                                                                                | whole chr X-Y   |              |             | contiguous gene syndrome                                                                    |                     |
| 55 | 45,X/46,XY mosaicism                                                                         | whole chr X     | 1            | 154,913,754 | contiguous gene syndrome                                                                    |                     |

Abbreviations: AD, autosomal dominant; AR, autosomal recessive; ASD, autism spectrum disorder; ID, intellectual disability; XLR, X-linked recessive

**Table S6C. Genes implicated in ID**

|    | Gene            | Chr. band | Disorder                                                                                                                                    | Inheritance pattern |
|----|-----------------|-----------|---------------------------------------------------------------------------------------------------------------------------------------------|---------------------|
| 1  | <i>SKI</i>      | 1p36.33   | Shprintzen-Goldberg syndrome                                                                                                                | AD                  |
| 2  | <i>GALE</i>     | 1p36.11   | Galactose epimerase deficiency (galactosemia III)                                                                                           | AR                  |
| 3  | <i>FUCA1</i>    | 1p36.11   | Fucosidosis                                                                                                                                 | AR                  |
| 4  | <i>ARID1A</i>   | 1p36.11   | Coffin-Siris syndrome                                                                                                                       | AD                  |
| 5  | <i>PIGV</i>     | 1p36.11   | Hyperphosphatasia mental retardation syndrome                                                                                               | AR                  |
| 6  | <i>SLC2A1</i>   | 1p34.2    | Glucose transport defect                                                                                                                    | AD                  |
| 7  | <i>ST3GAL3</i>  | 1p34.3    | Autosomal recessive non-syndromic ID                                                                                                        | AR                  |
| 8  | <i>STIL</i>     | 1p33      | Primary microcephaly                                                                                                                        | AR                  |
| 9  | <i>ALG6</i>     | 1p31.3    | Congenital disorder of glycosylation, type Ic                                                                                               | AR                  |
| 10 | <i>DBT</i>      | 1p21.2    | Maple syrup urine disease, type II                                                                                                          | AR                  |
| 11 | <i>AP4B1</i>    | 1p13.2    | Autosomal recessive ID with spastic paraplegia                                                                                              | AR                  |
| 12 | <i>NRAS</i>     | 1p13.2    | Noonan syndrome                                                                                                                             | AD                  |
| 13 | <i>GATAD2B</i>  | 1q21.3    | Autosomal dominant ID                                                                                                                       | AD                  |
| 14 | <i>KCNJ10</i>   | 1q23.2    | SESAME syndrome (seizures, sensorineural deafness, ataxia, mental retardation, and electrolyte imbalance)                                   | AR                  |
| 15 | <i>ASPM</i>     | 1q31      | Microcephaly and ID                                                                                                                         | AR                  |
| 16 | <i>SYT14</i>    | 1q32.2    | ID with adult-onset spinocerebellar ataxia                                                                                                  | AR                  |
| 17 | <i>RAB3GAP2</i> | 1q41      | Martolf syndrome (congenital cataracts, hypogonadism, and ID)                                                                               | AR                  |
| 18 | <i>TBCE</i>     | 1q42.3    | Hypoparathyroidism-retardation-dysmorphism syndrome                                                                                         | AR                  |
| 19 | <i>FH</i>       | 1q43      | Fumarase deficiency                                                                                                                         | AR                  |
| 20 | <i>MYCN</i>     | 2p24.3    | Feingold syndrome (microcephaly-oculo-digito-esophageal-duodenal syndrome), Microcephaly and digital abnormalities with normal intelligence | AD                  |
| 21 | <i>SOS1</i>     | 2p22.1    | Noonan syndrome                                                                                                                             | AD                  |
| 22 | <i>ERCC3</i>    | 2q14.3    | Trichothiodystrophy; Xeroderma pigmentosum, group B                                                                                         | AR                  |
| 23 | <i>RAB3GAP1</i> | 2q21.3    | Warburg Micro syndrome 1                                                                                                                    | AR                  |
| 24 | <i>ZEB2</i>     | 2q22.3    | Mowat-Wilson syndrome (Hirschsprung disease-mental retardation syndrome)                                                                    | AD                  |
| 25 | <i>BB55</i>     | 2q31.1    | Bardet-Biedl syndrome                                                                                                                       | AR                  |
| 26 | <i>GAD1</i>     | 2q31.1    | Spastic quadriplegic cerebral palsy                                                                                                         | AR                  |
| 27 | <i>TMEM237</i>  | 2q33.1    | Joubert syndrome 14                                                                                                                         | AR                  |
| 28 | <i>HDAC4</i>    | 2q37.3    | Brachydactyly mental retardation syndrome (2q37 deletion syndrome)                                                                          | AD                  |
| 29 | <i>D2HGDH</i>   | 2q37.3    | D-2-hydroxyglutaric aciduria                                                                                                                | AR                  |
| 30 | <i>CRBN</i>     | 3p26.2    | Autosomal recessive non-syndromic ID                                                                                                        | AR                  |
| 31 | <i>SUMF1</i>    | 3p26.2    | Multiple sulfatase deficiency                                                                                                               | AR                  |
| 32 | <i>TSEN2</i>    | 3p25.1    | Pontocerebellar hypoplasia type 2B                                                                                                          | AR                  |
| 33 | <i>RAF1</i>     | 3p25.1    | Noonan syndrome, LEOPARD syndrome                                                                                                           | AD                  |
| 34 | <i>TGFBR2</i>   | 3p24.1    | Loeys-Dietz syndrome                                                                                                                        | AD                  |
| 35 | <i>GLB1</i>     | 3p22.3    | GM1-gangliosidosis, Mucopolysaccharidosis IVB                                                                                               | AR                  |
| 36 | <i>CTNNA1</i>   | 3p22.1    | Autosomal dominant ID                                                                                                                       | AD                  |
| 37 | <i>GTDC2</i>    | 3p22.1    | Walker-Warburg syndrome                                                                                                                     | AR                  |
| 38 | <i>LZTFL1</i>   | 3p21.31   | Bardet-Biedl syndrome with situs inversus and polydactyly                                                                                   | AR                  |
| 39 | <i>DAG1</i>     | 3p21.31   | Limb-girdle muscular dystrophy                                                                                                              | AR                  |
| 40 | <i>ARL13B</i>   | 3q11.2    | Joubert syndrome 8                                                                                                                          | AR                  |
| 41 | <i>ARL6</i>     | 3q11.2    | Bardet-Biedl syndrome                                                                                                                       | AR                  |
| 42 | <i>CEP63</i>    | 3q22.2    | Primary microcephaly                                                                                                                        | AR                  |
| 43 | <i>ATR</i>      | 3q23      | Seckel syndrome                                                                                                                             | AR                  |
| 44 | <i>ALG3</i>     | 3q27.1    | Congenital disorder of glycosylation, type Id                                                                                               | AR                  |
| 45 | <i>KIAA0226</i> | 3q29      | Syndromic ID with ataxia, dysarthria and epilepsy                                                                                           | AR                  |
| 46 | <i>IDUA</i>     | 4p16.3    | Mucopolysaccharidosis 1h (Hurler syndrome); mucopolysaccharidosis 1s (Scheie syndrome)                                                      | AR                  |
| 47 | <i>CC2D2A</i>   | 4p15.3    | Joubert syndrome 9, Meckel syndrome, COACH syndrome                                                                                         | AR                  |
| 48 | <i>QDPR</i>     | 4p15.32   | Hyperphenylalaninemia due to dihydropteridine reductase deficiency                                                                          | AR                  |
| 49 | <i>SRD5A3</i>   | 4q12      | Kahrizi syndrome; congenital disorder of glycosylation, type Iq                                                                             | AR                  |
| 50 | <i>TMEM165</i>  | 4q12      | Congenital disorder of glycosylation, type iik                                                                                              | AR                  |
| 51 | <i>CEP135</i>   | 4q12      | Autosomal-recessive primary microcephaly                                                                                                    | AR                  |

|     | <b>Gene</b>     | <b>Chr. band</b> | <b>Disorder</b>                                                                                          | <b>Inheritance pattern</b> |
|-----|-----------------|------------------|----------------------------------------------------------------------------------------------------------|----------------------------|
| 52  | <i>SLC4A4</i>   | 4q13.3           | Renal tubular acidosis, proximal, with ocular abnormalities                                              | AR                         |
| 53  | <i>BBS7</i>     | 4q27             | Bardet-Biedl syndrome                                                                                    | AR                         |
| 54  | <i>BBS12</i>    | 4q27             | Bardet-Biedl syndrome                                                                                    | AR                         |
| 55  | <i>AGA</i>      | 4q34.3           | Aspartylglucosaminuria                                                                                   | AR                         |
| 56  | <i>NSUN2</i>    | 5p15.31          | Autosomal-recessive syndromic ID, Dubowitz syndrome                                                      | AR                         |
| 57  | <i>ANKH</i>     | 5p15.2           | Chondrocalcinosis 2, Craniometaphyseal dysplasia                                                         | AR                         |
| 58  | <i>C5orf42</i>  | 5p13.2           | Joubert syndrome 17                                                                                      | AR                         |
| 59  | <i>MOCS2</i>    | 5q11.2           | Molybdenum cofactor deficiency, type B                                                                   | AR                         |
| 60  | <i>ERCC8</i>    | 5q12.1           | Cockayne syndrome type A                                                                                 | AR                         |
| 61  | <i>SIL1</i>     | 5q31.2           | Marinesco-Sjogren syndrome                                                                               | AR                         |
| 62  | <i>TUBB2B</i>   | 6p25.2           | Asymmetric polymicrogyria                                                                                | AD                         |
| 63  | <i>NEU1</i>     | 6p21.3           | Sialidosis type I, Sialidosis type II                                                                    | AR                         |
| 64  | <i>MOCS1</i>    | 6p21.2           | Molybdenum cofactor deficiency, type A                                                                   | AR                         |
| 65  | <i>SLC17A5</i>  | 6q13             | Salla disease; Sialic acid storage disorder, infantile                                                   | AR                         |
| 66  | <i>ELOVL4</i>   | 6q14.1           | Ichthyosis, spastic quadriplegia, and mental retardation (recessive); Macular dystrophy (dominant)       | AR/AD                      |
| 67  | <i>BCKDHB</i>   | 6q14.1           | Maple syrup urine disease, type Ib                                                                       | AR                         |
| 68  | <i>RARS2</i>    | 6q15             | Pontocerebellar hypoplasia                                                                               | AR                         |
| 69  | <i>GRIK2</i>    | 6q16.3           | Autosomal recessive non-syndromic ID                                                                     | AR                         |
| 70  | <i>SOBP</i>     | 6q21             | Autosomal recessive syndromic and non-syndromic ID                                                       | AR                         |
| 71  | <i>LAMA2</i>    | 6q22.33          | Merosin-deficient congenital muscular dystrophy type 1A                                                  | AR                         |
| 72  | <i>ARG1</i>     | 6q23.2           | Argininemia                                                                                              | AR                         |
| 73  | <i>MED23</i>    | 6q23.2           | Autosomal recessive non-syndromic ID                                                                     | AR                         |
| 74  | <i>GTF2H5</i>   | 6q25.3           | Trichothiodystrophy                                                                                      | AR                         |
| 75  | <i>ACTB</i>     | 7p22.1           | Baraitser-Winter syndrome                                                                                | AD                         |
| 76  | <i>FAM126A</i>  | 7p15.3           | Hypomyelinating leukodystrophy                                                                           | AR                         |
| 77  | <i>BBS9</i>     | 7p14.3           | Bardet-Biedl syndrome                                                                                    | AR                         |
| 78  | <i>C7orf11</i>  | 7p14.1           | Trichothiodystrophy                                                                                      | AR                         |
| 79  | <i>GUSB</i>     | 7q11.21          | Mucopolysaccharidosis VII                                                                                | AR                         |
| 80  | <i>AP4M1</i>    | 7q22.1           | Autosomal recessive tetraplegic cerebral palsy with ID                                                   | AR                         |
| 81  | <i>RELN</i>     | 7q22             | Lissencephaly                                                                                            | AR                         |
| 82  | <i>DLN</i>      | 7q31.1           | Maple syrup urine disease, type III                                                                      | AR                         |
| 83  | <i>CEP41</i>    | 7q32.2           | Joubert syndrome 15                                                                                      | AR                         |
| 84  | <i>TPK1</i>     | 7q35             | Thiamine metabolism dysfunction syndrome (episodic encephalopathy type)                                  | AD                         |
| 85  | <i>EZH2</i>     | 7q36.1           | Weaver syndrome                                                                                          | AD                         |
| 86  | <i>MCPH1</i>    | 8p23             | Microcephaly and ID                                                                                      | AR                         |
| 87  | <i>ERLIN2</i>   | 8p12             | Autosomal recessive ID, motor dysfunction and multiple joint contractures                                | AR                         |
| 88  | <i>CA8</i>      | 8q12.1           | Cerebellar ataxia, quadrupedal locomotion and ID                                                         | AR                         |
| 89  | <i>TMEM67</i>   | 8q21             | Joubert syndrome 6, Meckel-Gruber syndrome                                                               | AR                         |
| 90  | <i>RAD21</i>    | 8q24.11          | Cornelia de Lange syndrome                                                                               | AD                         |
| 91  | <i>KCNK9</i>    | 8q24.3           | Birk-Barel mental retardation dysmorphism syndrome (imprinting defect)                                   | AD                         |
| 92  | <i>TRAPPC9</i>  | 8q24.3           | Autosomal recessive non-syndromic ID                                                                     | AR                         |
| 93  | <i>RECQL4</i>   | 8q24.3           | Baller-Gerold syndrome, Rothmund-Thomson syndrome and RAPADILINO syndrome                                | AR                         |
| 94  | <i>VLDLR</i>    | 9p24.2           | Cerebellar ataxia and ID                                                                                 | AR                         |
| 95  | <i>SLC1A1</i>   | 9p24.2           | Dicarboxylic aminoaciduria                                                                               | AR                         |
| 96  | <i>PIGO</i>     | 9p13.3           | Hyperphosphatasia with mental retardation syndrome                                                       | AR                         |
| 97  | <i>EXOSC3</i>   | 9p13.2           | Pontocerebellar hypoplasia and spinal motor neuron degeneration                                          | AR                         |
| 98  | <i>TGFBRI</i>   | 9q22.33          | Loeys-Dietz syndrome                                                                                     | AD                         |
| 99  | <i>FKTN</i>     | 9q31.2           | Fukuyama congenital muscular dystrophy with type 2 lissencephaly, Walker-Warburg syndrome                | AR                         |
| 100 | <i>TRIM32</i>   | 9q33.1           | Bardet-Biedl syndrome                                                                                    | AR                         |
| 101 | <i>CDK5RAP2</i> | 9q33.2           | Microcephaly vera                                                                                        | AR                         |
| 102 | <i>SPTAN1</i>   | 9q34.11          | West syndrome with severe cerebral hypomyelination, spastic quadriplegia and ID                          | AD                         |
| 103 | <i>KCNT1</i>    | 9q34.3           | Malignant migrating leukodystrophy with or without oligodontia and/or hypogonadotropic hypogonadism      | AD                         |
| 104 | <i>INPP5E</i>   | 9q34.3           | Joubert syndrome 1                                                                                       | AR                         |
| 105 | <i>MAN1B1</i>   | 9q34.3           | Autosomal recessive non-syndromic ID                                                                     | AR                         |
| 106 | <i>RAB18</i>    | 10p12.1          | Warburg micro syndrome                                                                                   | AR                         |
| 107 | <i>ERCC6</i>    | 10q11.23         | Cockayne syndrome type B, Cerebro-oculo-facio-skeletal syndrome                                          | AR                         |
| 108 | <i>KIAA1279</i> | 10q21.3          | Goldberg-Shprintzen megacolon syndrome                                                                   | AR                         |
| 109 | <i>ADK</i>      | 10q22.2          | Hypermethioninemia due to adenosine kinase deficiency                                                    | AR                         |
| 110 | <i>KAT6B</i>    | 10q22.2          | Say-Barber-Biesecker-Young-Simpson syndrome (SBBYSS syndrome)                                            | AD                         |
| 111 | <i>POLR3A</i>   | 10q22.3          | Hypomyelinating leukodystrophy with or without oligodontia and/or hypogonadotropic hypogonadism          | AR                         |
| 112 | <i>KIF11</i>    | 10q23.33         | Microcephaly variably associated with congenital lymphedema, chorioretinopathy and learning difficulties | AD                         |
| 113 | <i>TCTN3</i>    | 10q23.33         | Joubert syndrome 18, orofaciadigital syndrome IV                                                         | AR                         |
| 114 | <i>SMC3</i>     | 10q25.2          | Cornelia de Lange syndrome                                                                               | AD                         |
| 115 | <i>SHOC2</i>    | 10q25.2          | Noonan syndrome                                                                                          | AD                         |
| 116 | <i>SLC25A22</i> | 11p15.5          | Autosomal recessive neonatal epileptic encephalopathy                                                    | AR                         |
| 117 | <i>PAX6</i>     | 11p13            | Isolated and syndromic aniridia, including Gillespie syndrome (aniridia, cerebellar ataxia and ID)       | AD                         |
| 118 | <i>SLC35C1</i>  | 11p11.2          | Congenital disorder of glycosylation, type iic                                                           | AR                         |
| 119 | <i>PHF21A</i>   | 11p11.2          | Potocki-Shaffer syndrome (11p11.2 deletion)                                                              | AD                         |
| 120 | <i>TMEM138</i>  | 11q12.2          | Joubert syndrome 16                                                                                      | AR                         |
| 121 | <i>TMEM216</i>  | 11q12.2          | Joubert syndrome 2                                                                                       | AR                         |
| 122 | <i>BBS1</i>     | 11q13.1          | Bardet-Biedl syndrome                                                                                    | AR                         |

|     | <b>Gene</b>     | <b>Chr. band</b> | <b>Disorder</b>                                                                                                                               | <b>Inheritance pattern</b> |
|-----|-----------------|------------------|-----------------------------------------------------------------------------------------------------------------------------------------------|----------------------------|
| 123 | <i>ALG8</i>     | 11q14.1          | Congenital disorder of glycosylation type Ih                                                                                                  | AR                         |
| 124 | <i>MED17</i>    | 11q21            | Primary microcephaly of postnatal onset, spasticity, epilepsy, and ID                                                                         | AR                         |
| 125 | <i>ALG9</i>     | 11q23.1          | Congenital disorder of glycosylation, type II                                                                                                 | AR                         |
| 126 | <i>CBL</i>      | 11q23.3          | Noonan syndrome-like disorder                                                                                                                 | AD                         |
| 127 | <i>PVRL1</i>    | 11q23.3          | Cleft lip/palate ectodermal dysplasia syndrome                                                                                                | AR                         |
| 128 | <i>MLL2</i>     | 12q13.12         | Kabuki syndrome                                                                                                                               | AD                         |
| 129 | <i>TUBA1A</i>   | 12q13.12         | Lissencephaly                                                                                                                                 | AD                         |
| 130 | <i>DIP2B</i>    | 12q13.13         | Mental retardation, FRA12A type                                                                                                               | AD                         |
| 131 | <i>SUOX</i>     | 12q13.2          | Sulfite oxidase deficiency                                                                                                                    | AR                         |
| 132 | <i>GNPTAB</i>   | 12q23.2          | Mucopolidosis III alpha/beta                                                                                                                  | AR                         |
| 133 | <i>IGF1</i>     | 12q23.2          | Growth retardation with deafness and mental retardation due to IGF1 deficiency                                                                | AR                         |
| 134 | <i>POLR3B</i>   | 12q23.3          | Leukodystrophy, hypomyelinating, 8, with or without oligodontia and/or hypogonadotropic hypogonadism                                          | AR                         |
| 135 | <i>ATP6V0A2</i> | 12q24.31         | Cutis laxa with epilepsy and mental retardation                                                                                               | AR                         |
| 136 | <i>CENPJ</i>    | 13q12.12         | Microcephaly vera, Seckel syndrome                                                                                                            | AR                         |
| 137 | <i>SLC25A15</i> | 13q14.11         | Ornithine translocase deficiency                                                                                                              | AR                         |
| 138 | <i>MIR17HG</i>  | 13q31.3          | Feingold syndrome                                                                                                                             | AD                         |
| 139 | <i>ERCC5</i>    | 13q33.1          | Cockayne syndrome, Cerebro-oculo-facio-skeletal syndrome                                                                                      | AR                         |
| 140 | <i>COL4A1</i>   | 13q34            | Porencephaly                                                                                                                                  | AD                         |
| 141 | <i>AP4S1</i>    | 14q12            | Autosomal recessive ID with spastic paraplegia                                                                                                | AR                         |
| 142 | <i>MGAT2</i>    | 14q22.1          | Congenital disorder of glycosylation, type iia                                                                                                | AR                         |
| 143 | <i>GCH1</i>     | 14q22.2-q22.3    | Tetrahydrobiopterin-deficient hyperphenylalaninemia B                                                                                         | AR                         |
| 144 | <i>POMT2</i>    | 14q24.3          | Walker-Warburg syndrome                                                                                                                       | AR                         |
| 145 | <i>GALC</i>     | 14q31.3          | Krabbe disease                                                                                                                                | AR                         |
| 146 | <i>ZC3H14</i>   | 14q31.3          | Autosomal recessive non-syndromic ID                                                                                                          | AR                         |
| 147 | <i>TTC8</i>     | 14q31.3          | Bardet-Biedl syndrome                                                                                                                         | AR                         |
| 148 | <i>VRK1</i>     | 14q32.2          | Pontocerebellar hypoplasia type 1                                                                                                             | AR                         |
| 149 | <i>DYNC1H1</i>  | 14q32.31         | Severe ID with neuronal migration defects; Charcot-Marie-Tooth disease, axonal, type 20                                                       | AD                         |
| 150 | <i>SLC12A6</i>  | 15q14            | Andermann syndrome                                                                                                                            | AR                         |
| 151 | <i>CEP152</i>   | 15q21.1          | Primary microcephaly                                                                                                                          | AR                         |
| 152 | <i>AP4E1</i>    | 15q21.2          | Spastic paraplegia 51, autosomal recessive                                                                                                    | AR                         |
| 153 | <i>BBS4</i>     | 15q24.1          | Bardet-Biedl syndrome                                                                                                                         | AR                         |
| 154 | <i>KIF7</i>     | 15q26.1          | Joubert syndrome 12                                                                                                                           | AR                         |
| 155 | <i>IDH2</i>     | 15q26.1          | D-2-hydroxyglutaric aciduria 2                                                                                                                | AD                         |
| 156 | <i>GNPTG</i>    | 16p13.3          | Mucopolidosis III gamma                                                                                                                       | AR                         |
| 157 | <i>TBC1D24</i>  | 16p13.3          | Autosomal recessive syndrome of focal epilepsy, dysarthria, and ID                                                                            | AR                         |
| 158 | <i>ZNF423</i>   | 16q12.1          | Joubert syndrome 19 (dominant); nephronophthisis (recessive)                                                                                  | AD/AR                      |
| 159 | <i>TUBB3</i>    | 16q34.3          | Cortical dysplasia, complex, with other brain malformations                                                                                   | AD                         |
| 160 | <i>PMM2</i>     | 16p13.2          | Congenital disorder of glycosylation, type Ia                                                                                                 | AR                         |
| 161 | <i>GRIN2A</i>   | 16p13.2          | Variable neurodevelopmental phenotypes, including ID and/or epilepsy                                                                          | AD                         |
| 162 | <i>NDE1</i>     | 16p13.11         | Lissencephaly                                                                                                                                 | AR                         |
| 163 | <i>BBS2</i>     | 16q13            | Bardet-Biedl syndrome                                                                                                                         | AR                         |
| 164 | <i>GPR56</i>    | 16q13            | Autosomal recessive bilateral frontoparietal polymicrogyria                                                                                   | AR                         |
| 165 | <i>COG8</i>     | 16q22.1          | Congenital disorder of glycosylation, type iih                                                                                                | AR                         |
| 166 | <i>TMEM231</i>  | 16q23.1          | Joubert syndrome 20                                                                                                                           | AR                         |
| 167 | <i>CDH15</i>    | 16q24.3          | Autosomal dominant non-syndromic ID                                                                                                           | AD                         |
| 168 | <i>CHMP1A</i>   | 16q24.3          | Pontocerebellar hypoplasia, microcephaly, ID                                                                                                  | AR                         |
| 169 | <i>WDR81</i>    | 17p13.3          | Cerebellar hypoplasia, quadrupedal locomotion and ID                                                                                          | AR                         |
| 170 | <i>MPDU1</i>    | 17p13.1          | Congenital disorder of glycosylation, type If                                                                                                 | AR                         |
| 171 | <i>PIGL</i>     | 17p11.2          | CHIME syndrome (colobomas, heart defects, ichthyosiform dermatosis, mental retardation, and ear anomalies, including conductive hearing loss) | AR                         |
| 172 | <i>ALDH3A2</i>  | 17p11.2          | Sjogren-Larsson syndrome                                                                                                                      | AR                         |
| 173 | <i>SLC46A1</i>  | 17q11.2          | Folate malabsorption                                                                                                                          | AR                         |
| 174 | <i>SMARCE1</i>  | 17q21.2          | Coffin-Siris syndrome                                                                                                                         | AD                         |
| 175 | <i>EFTUD2</i>   | 17q21.31         | Mandibulofacial dysostosis with microcephaly                                                                                                  | AD                         |
| 176 | <i>GFAP</i>     | 17q21.31         | Alexander disease                                                                                                                             | AD                         |
| 177 | <i>MKS1</i>     | 17q22            | Bardet-Biedl syndrome, Meckel syndrome                                                                                                        | AR                         |
| 178 | <i>COG1</i>     | 17q25.1          | Congenital disorder of glycosylation, type iig                                                                                                | AR                         |
| 179 | <i>TSEN54</i>   | 17q25.1          | Pontocerebellar hypoplasia type 2A                                                                                                            | AR                         |
| 180 | <i>ACTG1</i>    | 17q25.3          | Baraitser-Winter syndrome                                                                                                                     | AD                         |
| 181 | <i>RBBP8</i>    | 18q11.2          | Seckel syndrome, Jawad syndrome                                                                                                               | AR                         |
| 182 | <i>IER3IP1</i>  | 18q21.1          | Microcephaly with simplified gyration, epilepsy, and infantile diabetes                                                                       | AR                         |
| 183 | <i>RTTN</i>     | 18q22.2          | Polymicrogyria, ID                                                                                                                            | AR                         |
| 184 | <i>MAP2K2</i>   | 19p13.3          | Cardio-facio-cutaneous syndrome                                                                                                               | AD                         |
| 185 | <i>MCOLN1</i>   | 19p13.2          | Mucopolidosis IV                                                                                                                              | AR                         |
| 186 | <i>SMARCA4</i>  | 19p13.2          | Coffin-Siris syndrome                                                                                                                         | AD                         |
| 187 | <i>CC2D1A</i>   | 19p13.12         | Autosomal recessive non-syndromic ID                                                                                                          | AR                         |
| 188 | <i>GPSN2</i>    | 19p13.12         | Autosomal recessive non-syndromic ID                                                                                                          | AR                         |
| 189 | <i>WDR62</i>    | 19q13.12         | Severe brain malformations, including microcephaly, pachygyria and hypoplasia of the corpus callosum                                          | AR                         |
| 190 | <i>BCKDHA</i>   | 19q13.2          | Maple syrup urine disease, type Ia                                                                                                            | AR                         |
| 191 | <i>ERCC2</i>    | 19q13.32         | Cockayne syndrome, Trichothiodystrophy, Cerebro-oculo-facio-skeletal syndrome                                                                 | AR                         |
| 192 | <i>ERCC1</i>    | 19q13.32         | Cerebro-oculo-facio-skeletal syndrome                                                                                                         | AR                         |

|     | Gene           | Chr. band | Disorder                                                                                                                      | Inheritance pattern |
|-----|----------------|-----------|-------------------------------------------------------------------------------------------------------------------------------|---------------------|
| 193 | <i>FKRP</i>    | 19q13.32  | Congenital muscular dystrophy 1C, limb-girdle muscular dystrophy type 2I, muscle-eye-brain disease, Walker-Warburg syndrome   | AR                  |
| 194 | <i>PNKP</i>    | 19q13.33  | Microcephaly, seizures and defects in DNA repair                                                                              | AR                  |
| 195 | <i>ASXL1</i>   | 20q11.21  | Bohring-Opitz syndrome                                                                                                        | AD                  |
| 196 | <i>DNMT3B</i>  | 20q11.2   | Immunodeficiency-centromeric instability-facial anomalies syndrome 1                                                          | AR                  |
| 197 | <i>CTSA</i>    | 20q13.12  | Galactosialidosis                                                                                                             | AR                  |
| 198 | <i>ARFGEF2</i> | 20q13.13  | Autosomal recessive periventricular heterotopia with microcephaly                                                             | AR                  |
| 199 | <i>DPM1</i>    | 20q13.13  | Congenital disorder of glycosylation, type Ie                                                                                 | AR                  |
| 200 | <i>CBS</i>     | 21q22.3   | Homocystinuria                                                                                                                | AR                  |
| 201 | <i>PCNT</i>    | 21q22.3   | Seckel syndrome, Majewski osteodysplastic primordial dwarfism type II                                                         | AR                  |
| 202 | <i>SNAP29</i>  | 22q11.21  | Cerebral dysgenesis, neuropathy, ichthyosis, and palmoplantar keratoderma syndrome                                            | AR                  |
| 203 | <i>SMARCB1</i> | 22q11.23  | Coffin-Siris syndrome                                                                                                         | AD                  |
| 204 | <i>LARGE</i>   | 22q12.3   | Congenital muscular dystrophy                                                                                                 | AR                  |
| 205 | <i>EP300</i>   | 22q13.2   | Rubinstein-Taybi syndrome                                                                                                     | AD                  |
| 206 | <i>CYB5R3</i>  | 22q13.2   | Methemoglobinemia type II                                                                                                     | AR                  |
| 207 | <i>ALG12</i>   | 22q13.33  | Congenital disorder of glycosylation, type Ig                                                                                 | AR                  |
| 208 | <i>CHKB</i>    | 22q13.33  | Congenital muscular dystrophy, mitochondrial structural abnormalities and ID                                                  | AR                  |
| 209 | <i>HCCS</i>    | Xp22.2    | Microphthalmia with linear skin defects syndrome                                                                              | XLD                 |
| 210 | <i>OFD1</i>    | Xp22.2    | Oral-facial-digital syndrome type I (XL dominant), Simpson-Golabi-Behmel syndrome, type 2 (XL recessive), Joubert syndrome 10 | XLD/XLR             |
| 211 | <i>FANCB</i>   | Xp22.2    | VACTERL with hydrocephalus, Fanconi anemia of complementation group B                                                         | XLR                 |
| 212 | <i>PDHA1</i>   | Xp22.12   | Pyruvate decarboxylase deficiency                                                                                             | XLD                 |
| 213 | <i>RPS6KA3</i> | Xp22.12   | Coffin-Lowry syndrome, non-syndromic ID                                                                                       | XLD                 |
| 214 | <i>MBTPS2</i>  | Xp22.12   | Ichthyosis follicularis, atrichia and photophobia syndrome                                                                    | XLR                 |
| 215 | <i>SMS</i>     | Xp22.11   | X-linked ID, Snyder-Robinson type                                                                                             | XLR                 |
| 216 | <i>GK</i>      | Xp21.2    | Glycerol kinase deficiency                                                                                                    | XLD                 |
| 217 | <i>TSPAN7</i>  | Xp11.4    | Non-syndromic X-linked ID                                                                                                     | XLR                 |
| 218 | <i>BCOR</i>    | Xp11.4    | Syndromic Lenz microphthalmia-2, oculofaciocardiodental syndrome                                                              | XLD                 |
| 219 | <i>ATP6AP2</i> | Xp11.4    | X-linked ID with epilepsy                                                                                                     | XLR                 |
| 220 | <i>MAOA</i>    | Xp11.3    | Brunner syndrome (Monoamine oxidase A deficiency)                                                                             | XLR                 |
| 221 | <i>PORCN</i>   | Xp11.23   | Focal dermal hypoplasia                                                                                                       | XLD                 |
| 222 | <i>SYP</i>     | Xp11.23   | Non-syndromic X-linked ID                                                                                                     | XLD                 |
| 223 | <i>SHROOM4</i> | Xp11.22   | Stocco dos Santos X-linked ID syndrome, non-syndromic X-linked ID                                                             | XLR                 |
| 224 | <i>HUWE1</i>   | Xp11.22   | Non-syndromic X-linked ID (duplications, XL recessive); syndromic X-linked ID, Turner type (point mutations, XL dominant)     | XLD/XLR             |
| 225 | <i>ARHGEF9</i> | Xq11.1    | Syndromic X-linked ID, hyperekplexia and epilepsy                                                                             | XLR                 |
| 226 | <i>DLG3</i>    | Xq13.1    | Non-syndromic X-linked ID                                                                                                     | XLR                 |
| 227 | <i>HDAC8</i>   | Xq13.1    | Cornelia de Lange syndrome; Wilson-Turner syndrome                                                                            | XLD                 |
| 228 | <i>SLC16A2</i> | Xq13.2    | T3 transporter deficiency; syndromic and non-syndromic ID                                                                     | XLD                 |
| 229 | <i>ATP7A</i>   | Xq21.1    | Menkes disease, occipital horn syndrome                                                                                       | XLR                 |
| 230 | <i>PGK1</i>    | Xq21.1    | Phosphoglycerate kinase-1 deficiency                                                                                          | XLR                 |
| 231 | <i>BRWD3</i>   | Xq21.1    | Non-syndromic X-linked ID                                                                                                     | XLR                 |
| 232 | <i>ZNF711</i>  | Xq21.1    | Non-syndromic X-linked ID                                                                                                     | XLR                 |
| 233 | <i>TIMM8A</i>  | Xq22.1    | Mohr-Tranebjaerg syndrome, Jensen syndrome                                                                                    | XLR                 |
| 234 | <i>RAB40AL</i> | Xq22.1    | Syndromic X-linked ID, Martin-Probst type                                                                                     | XLR                 |
| 235 | <i>PLP1</i>    | Xq22.2    | Pelizaeus-Merzbacher disease                                                                                                  | XLR                 |
| 236 | <i>PRPS1</i>   | Xq22.3    | Phosphoribosylpyrophosphate synthetase superactivity, Arts syndrome                                                           | XLR                 |
| 237 | <i>PAK3</i>    | Xq22.3    | Non-syndromic X-linked ID                                                                                                     | XLR                 |
| 238 | <i>UBE2A</i>   | Xq24      | Syndromic X-linked ID, Nascimento-type                                                                                        | XLR                 |
| 239 | <i>NDUFA1</i>  | Xq24      | Mitochondrial complex I deficiency (syndromic X-linked ID)                                                                    | XLD                 |
| 240 | <i>CUL4B</i>   | Xq24      | Syndromic X-linked ID, Cabezas type                                                                                           | XLR                 |
| 241 | <i>ZDHHC9</i>  | Xq25      | Syndromic X-linked ID, Raymond type; non-syndromic X-linked ID                                                                | XLD                 |
| 242 | <i>GPC3</i>    | Xq26.2    | Simpson-Golabi-Behmel syndrome type 1                                                                                         | XLR                 |
| 243 | <i>HPRT1</i>   | Xq26.2    | Lesch-Nyhan syndrome                                                                                                          | XLR                 |
| 244 | <i>SOX3</i>    | Xq27.1    | Isolated GH deficiency, short stature and ID                                                                                  | XLR                 |
| 245 | <i>IDS</i>     | Xq28      | Mucopolysaccharidosis II (Hunter syndrome)                                                                                    | XLR                 |
| 246 | <i>NSDHL</i>   | Xq28      | CK syndrome (XL recessive); CHILD syndrome (Congenital Hemidysplasia with Ichthyosiform Nevus and Limb Defects) (XL dominant) | XLR/XLD             |
| 247 | <i>ABCD1</i>   | Xq28      | Adrenoleukodystrophy                                                                                                          | XLD                 |
| 248 | <i>HCFC1</i>   | Xq28      | Non-syndromic X-linked ID                                                                                                     | XLR                 |
| 249 | <i>FLNA</i>    | Xq28      | Bilateral periventricular nodular heterotopia, otopalatodigital syndrome, frontometaphyseal dysplasia                         | XLD                 |
| 250 | <i>GDI1</i>    | Xq28      | Non-syndromic X-linked ID                                                                                                     | XLD                 |
| 251 | <i>IKBKG</i>   | Xq28      | Incontinentia pigmenti                                                                                                        | XLD                 |
| 252 | <i>DKC1</i>    | Xq28      | Dyskeratosis congenita                                                                                                        | XLR                 |

Note that all the ASD genes listed in **Table S6A** are also involved in ID.

Abbreviations: AD, autosomal dominant; AR, autosomal recessive; ID, intellectual disability; XL, X-linked; XLD, X-linked dominant; XLR, X-linked recessive



**Table S6D. Loci implicated in ID**

|   | Disorder                                                        | Chr. band      | Start (hg18) | End (hg18)  | Genes involved            | Inheritance pattern |
|---|-----------------------------------------------------------------|----------------|--------------|-------------|---------------------------|---------------------|
| 1 | Thrombocytopenia-absent radius (TAR) syndrome                   | 1q21.1         | 144,110,432  | 144,305,571 | <i>RBM8A</i>              | AR                  |
| 2 | 3p deletion syndrome                                            | 3p26.3p25.3    | 1            | 9,000,000   | contiguous gene syndrome? | AD                  |
| 3 | Proximal 15q25.2 microdeletion                                  | 15q25          | 80,451,495   | 82,719,635  | ?                         | AD                  |
| 4 | ATR-16 syndrome (alpha-thalassemia/mental retardation syndrome) | 16p13.3        | 30,843       | 774,373     | ?                         | AD                  |
| 5 | 17p13.1 microdeletion syndrome                                  | 17p13.1        | 7,429,371    | 7,937,620   | ?                         | AD                  |
| 6 | 19p13.13 microdeletion/microduplication syndrome                | 19p13.13       | 12,793,474   | 13,104,643  | ?                         | AD                  |
| 7 | Cat-Eye syndrome                                                | 22p13-22q11.21 | 15,772,953   | 16,971,860  | ?                         | AD                  |
| 8 | 22q11.2 distal deletion syndrome                                | 22q11.2        | 20,445,848   | 22,026,229  | ?                         | AD                  |
| 9 | Pelizaeus-Merzbacher disease                                    | Xq22.2         | 102,918,095  | 102,934,203 | <i>PLP1</i>               | XLR                 |

Note that all the ASD loci listed in **Table S6B** are also involved in ID.

Abbreviations: AD, autosomal dominant; AR, autosomal recessive; ID, intellectual disability; XLR, X-linked recessive

**Table S7A. CNVs overlapping ASD or ID genes and loci in affected and control subjects (all ancestries)**

**Cases**

| AGP ID           | Sex | Chr#:start-end (hg18)  | Size      | CNV type | Inheritance | Classification | Validation                     | CNV description                                                                                                                                                                                                                                                                                                    |
|------------------|-----|------------------------|-----------|----------|-------------|----------------|--------------------------------|--------------------------------------------------------------------------------------------------------------------------------------------------------------------------------------------------------------------------------------------------------------------------------------------------------------------|
| 16035_1571013001 | M   | 1:144482933-146325557  | 1,842,625 | Gain     | dn          | Pathogenic     | qPCR                           | 1q21.1 duplication syndrome                                                                                                                                                                                                                                                                                        |
| 8635_201         | M   | 1:144500467-146377870  | 1,877,404 | Loss     | dn          | Pathogenic     | qPCR                           | 1q21.1 deletion syndrome                                                                                                                                                                                                                                                                                           |
| 1952_301         | M   | 1:144500467-146336720  | 1,836,254 | Gain     | dn          | Pathogenic     | qPCR                           | 1q21.1 duplication syndrome                                                                                                                                                                                                                                                                                        |
| 13135_1523       | F   | 1:144838594-146308287  | 1,469,694 | Gain     | dn          | Pathogenic     | qPCR                           | 1q21.1 duplication syndrome                                                                                                                                                                                                                                                                                        |
| 4291_1           | M   | 1:144967972-146317915  | 1,349,944 | Gain     | mat         | Pathogenic     | qPCR                           | 1q21.1 duplication syndrome                                                                                                                                                                                                                                                                                        |
| 16074_1571042001 | M   | 2:50037898-50407550    | 369,653   | Loss     | mat         | Pathogenic     | qPCR                           | <i>NRXN1</i> exonic deletion                                                                                                                                                                                                                                                                                       |
| 14068_1180       | M   | 2:50493827-50677835    | 184,009   | Gain     | dn          | Pathogenic     | qPCR                           | <i>NRXN1</i> intragenic duplication, predicted to result in a premature truncated protein                                                                                                                                                                                                                          |
| 13017_223        | F   | 2:50539877-50730546    | 190,670   | Loss     | dn          | Pathogenic     | qPCR                           | <i>NRXN1</i> exonic deletion                                                                                                                                                                                                                                                                                       |
| 13216_2383       | M   | 2:50968208-51214171    | 245,964   | Loss     | dn          | Pathogenic     | qPCR                           | <i>NRXN1</i> exonic deletion                                                                                                                                                                                                                                                                                       |
| 13153_1703       | M   | 2:50990306-51222043    | 231,738   | Loss     | dn          | Pathogenic     | qPCR                           | <i>NRXN1</i> exonic deletion                                                                                                                                                                                                                                                                                       |
| 13037_463        | M   | 2:51002576-51157742    | 155,167   | Loss     | dn          | Pathogenic     | qPCR                           | <i>NRXN1</i> exonic deletion                                                                                                                                                                                                                                                                                       |
| 17027_1          | M   | 2:51076611-51147600    | 70,990    | Loss     | pat         | Pathogenic     | qPCR                           | <i>NRXN1</i> exonic deletion                                                                                                                                                                                                                                                                                       |
| 5353_3           | F   | 6:33399849-33512042    | 112,194   | Loss     | dn          | Pathogenic     | qPCR                           | <i>SYNGAP1</i> exonic deletion                                                                                                                                                                                                                                                                                     |
| 5386_3           | M   | 6:156785155-158489874  | 1,704,720 | Loss     | dn          | Pathogenic     | qPCR, Illumina 1M              | <i>ARID1B</i> exonic deletion                                                                                                                                                                                                                                                                                      |
| 8446_201         | M   | 7:72344426-73782113    | 1,437,688 | Loss     | dn          | Pathogenic     | qPCR                           | Williams syndrome (7q11.23 deletion)                                                                                                                                                                                                                                                                               |
| 13123_1403       | F   | 9:98998-3682923        | 3,583,926 | Loss     | dn          | Pathogenic     | qPCR                           | Terminal 9p deletion, 3.58 Mb (14 genes)                                                                                                                                                                                                                                                                           |
| 6259_3           | M   | 9:139516033-140208462  | 692,430   | Loss     | dn          | Pathogenic     | qPCR                           | Kleefstra syndrome (9q34.3 deletion including <i>EHMT1</i> )                                                                                                                                                                                                                                                       |
| 6325_3           | M   | 11:70077507-70506315   | 428,809   | Loss     | dn          | Pathogenic     | qPCR                           | <i>SHANK2</i> exonic deletion                                                                                                                                                                                                                                                                                      |
| 6319_3           | M   | 11:70119917-70187872   | 67,956    | Loss     | dn          | Pathogenic     | qPCR                           | <i>SHANK2</i> exonic deletion                                                                                                                                                                                                                                                                                      |
| 5237_3           | M   | 11:70154458-70220632   | 66,175    | Loss     | dn          | Pathogenic     | qPCR, Agilent 1M               | <i>SHANK2</i> exonic deletion                                                                                                                                                                                                                                                                                      |
| 6240_4           | M   | 11:126633939-132060374 | 5,426,436 | Loss     | dn          | Pathogenic     | qPCR                           | Chromosome 11q deletion syndrome (Jacobsen syndrome)                                                                                                                                                                                                                                                               |
| 20187_1464001    | M   | 15:18811937-26209270   | 7,397,334 | Gain     | dn          | Pathogenic     | qPCR                           | 15q11-q13 duplication syndrome, maternally derived                                                                                                                                                                                                                                                                 |
| 8630_201         | M   | 15:19800798-26209270   | 6,408,473 | Gain     | dn          | Pathogenic     | qPCR                           | 15q11-q13 duplication syndrome, paternally derived                                                                                                                                                                                                                                                                 |
| 20069_1328001    | M   | 15:20203578-26209270   | 6,005,693 | Gain     | dn          | Pathogenic     | qPCR                           | 15q11-q13 duplication syndrome, maternally derived                                                                                                                                                                                                                                                                 |
| 17035_1          | F   | 15:20274130-26120360   | 5,846,231 | Gain     | dn          | Pathogenic     | qPCR                           | 15q11-q13 duplication syndrome, maternally derived                                                                                                                                                                                                                                                                 |
| 8117_202         | M   | 15:21168391-26217954   | 5,049,564 | Gain     | mat         | Pathogenic     | qPCR                           | 15q11-q13 duplication syndrome, maternally derived                                                                                                                                                                                                                                                                 |
| 8741_201         | F   | 15:21168391-26315093   | 5,146,703 | Gain     | mat         | Pathogenic     | qPCR                           | 15q11-q13 duplication syndrome, maternally derived                                                                                                                                                                                                                                                                 |
| 13050_593        | M   | 15:21190624-26203954   | 5,013,331 | Gain     | dn          | Pathogenic     | qPCR                           | 15q11-q13 duplication syndrome, maternally derived                                                                                                                                                                                                                                                                 |
| 1950_301         | M   | 15:26762141-30436163   | 3,674,023 | Loss     | mat         | Pathogenic     | Illumina 550K                  | 15q13.3 deletion syndrome                                                                                                                                                                                                                                                                                          |
| 16040_1571029001 | M   | 15:28450423-30303265   | 1,852,843 | Loss     | dn          | Pathogenic     | qPCR                           | 15q13.3 deletion syndrome                                                                                                                                                                                                                                                                                          |
| 14167_2720       | M   | 15:28705540-30436163   | 1,730,624 | Loss     | pat         | Pathogenic     | qPCR                           | 15q13.3 deletion syndrome                                                                                                                                                                                                                                                                                          |
| 18100_302        | M   | 15:28714502-30303265   | 1,588,764 | Loss     | pat         | Pathogenic     | qPCR                           | 15q13.3 deletion syndrome                                                                                                                                                                                                                                                                                          |
| 5537_3           | M   | 15:82722026-83529838   | 807,813   | Loss     | mat         | Pathogenic     | Affy 500K, Illumina 2.5M, qPCR | Distal 15q25.2 deletion syndrome                                                                                                                                                                                                                                                                                   |
| 14283_4060       | M   | 16:14771033-16307313   | 1,536,281 | Loss     | mat         | Pathogenic     | qPCR                           | 16p13.11 deletion syndrome                                                                                                                                                                                                                                                                                         |
| 3441_3           | M   | 16:14808871-16215852   | 1,406,982 | Loss     | pat         | Pathogenic     | qPCR                           | 16p13.11 deletion syndrome                                                                                                                                                                                                                                                                                         |
| 14412_5210       | M   | 16:14960247-16307313   | 1,347,067 | Loss     | mat         | Pathogenic     | qPCR, LR-PCR                   | 16p13.11 deletion syndrome                                                                                                                                                                                                                                                                                         |
| 2204_1           | M   | 16:29466569-30147029   | 680,461   | Loss     | dn          | Pathogenic     | qPCR                           | 16p11.2 deletion syndrome                                                                                                                                                                                                                                                                                          |
| 3544_3           | M   | 16:29499858-30107306   | 607,449   | Gain     | mat         | Pathogenic     | —                              | 16p11.2 duplication syndrome                                                                                                                                                                                                                                                                                       |
| 5068_3           | F   | 16:29502984-30127026   | 624,043   | Loss     | dn          | Pathogenic     | qPCR, Affy 500K, Agilent 1M    | 16p11.2 deletion syndrome, 50% mosaicism                                                                                                                                                                                                                                                                           |
| 20089_1391001    | M   | 16:29502984-30107306   | 604,323   | Loss     | dn          | Pathogenic     | qPCR                           | 16p11.2 deletion syndrome                                                                                                                                                                                                                                                                                          |
| 3211_3           | M   | 16:29502984-30127026   | 624,043   | Gain     | mat         | Pathogenic     | qPCR                           | 16p11.2 duplication syndrome                                                                                                                                                                                                                                                                                       |
| 5262_4           | M   | 16:29502984-30210849   | 707,866   | Gain     | dn          | Pathogenic     | qPCR, Affy 500K                | 16p11.2 duplication syndrome                                                                                                                                                                                                                                                                                       |
| 5359_4           | M   | 16:29554843-30195224   | 640,382   | Loss     | dn          | Pathogenic     | qPCR, Affy 500K, Agilent 1M    | 16p11.2 deletion syndrome                                                                                                                                                                                                                                                                                          |
| 20127_4014001    | M   | 16:29554843-30130862   | 576,020   | Loss     | pat         | Pathogenic     | qPCR                           | 16p11.2 deletion syndrome                                                                                                                                                                                                                                                                                          |
| 4030_1           | M   | 16:29554843-30107306   | 552,464   | Gain     | dn          | Pathogenic     | qPCR                           | 16p11.2 duplication syndrome                                                                                                                                                                                                                                                                                       |
| 3439_3           | M   | 17:17156307-18262979   | 1,106,673 | Loss     | dn          | Pathogenic     | qPCR                           | Smith-Magenis syndrome (17p11.2 deletion including <i>RAI1</i> )                                                                                                                                                                                                                                                   |
| 2211_1           | F   | 17:17169258-20101517   | 2,932,260 | Loss     | dn          | Pathogenic     | qPCR                           | Smith-Magenis syndrome (17p11.2 deletion including <i>RAI1</i> )                                                                                                                                                                                                                                                   |
| 14315_4320       | M   | 17:31621634-33323919   | 1,702,286 | Gain     | mat         | Pathogenic     | qPCR                           | 17q12 duplication syndrome                                                                                                                                                                                                                                                                                         |
| 3183_7           | M   | 22:17241748-19819918   | 2,578,171 | Loss     | dn          | Pathogenic     | qPCR                           | 22q11.2 deletion syndrome                                                                                                                                                                                                                                                                                          |
| 17015_1          | M   | 22:17257787-19795780   | 2,537,994 | Loss     | dn          | Pathogenic     | qPCR                           | 22q11.2 deletion syndrome                                                                                                                                                                                                                                                                                          |
| 3127_4           | M   | 22:17257787-19793730   | 2,535,944 | Gain     | pat         | Pathogenic     | qPCR                           | 22q11.2 duplication syndrome                                                                                                                                                                                                                                                                                       |
| 4271_1           | M   | 22:17257787-19795780   | 2,537,994 | Gain     | dn          | Pathogenic     | qPCR                           | 22q11.2 duplication syndrome                                                                                                                                                                                                                                                                                       |
| 5261_4           | F   | 22:17257787-19795780   | 2,537,994 | Gain     | pat         | Pathogenic     | qPCR, Illumina 1M              | 22q11.2 duplication syndrome                                                                                                                                                                                                                                                                                       |
| 16074_1571042001 | M   | 22:17257787-19793730   | 2,535,944 | Gain     | pat         | Pathogenic     | qPCR                           | 22q11.2 duplication syndrome                                                                                                                                                                                                                                                                                       |
| 8627_201         | M   | 22:17257787-19793730   | 2,535,944 | Gain     | dn          | Pathogenic     | qPCR                           | 22q11.2 duplication syndrome                                                                                                                                                                                                                                                                                       |
| 2072_1           | M   | 22:45159185-49582267   | 4,423,083 | Loss     | dn          | Pathogenic     | qPCR                           | Phelan-McDermid syndrome (22q13 deletion including <i>SHANK3</i> )                                                                                                                                                                                                                                                 |
| 6130_4           | F   | 22:47996161-49512530   | 1,516,370 | Loss     | dn          | Pathogenic     | qPCR, MLPA                     | Phelan-McDermid syndrome (22q13 deletion including <i>SHANK3</i> )                                                                                                                                                                                                                                                 |
| 16079_1571066001 | M   | 22:49470371-49567383   | 97,013    | Loss     | dn          | Pathogenic     | qPCR                           | Phelan-McDermid syndrome (22q13 deletion including <i>SHANK3</i> )                                                                                                                                                                                                                                                 |
| 5240_4           | M   | X:23116188-23280628    | 164,441   | Loss     | mat         | Pathogenic     | qPCR, Illumina 1M              | <i>PTCHD1</i> exonic deletion                                                                                                                                                                                                                                                                                      |
| 5126_4           | M   | X:28931559-29478966    | 547,408   | Gain     | mat         | Pathogenic     | qPCR, Agilent 1M               | <i>IL1RAPL1</i> intragenic duplication of exons 3-5                                                                                                                                                                                                                                                                |
| 8597_201         | M   | X:31303978-32025062    | 721,085   | Loss     | mat         | Pathogenic     | qPCR                           | <i>DMD</i> deletion of exons 45-60                                                                                                                                                                                                                                                                                 |
| 3019_3           | M   | X:32100618-32315937    | 215,320   | Gain     | mat         | Pathogenic     | qPCR                           | <i>DMD</i> duplication of exons 31-44                                                                                                                                                                                                                                                                              |
| 20013_1075001    | M   | X:153239048-153521797  | 282,750   | Gain     | dn          | Pathogenic     | qPCR, LR-PCR                   | Xq28 duplication encompassing 20 genes, including 3 involved in ID: <i>FLNA</i> , <i>GDI1</i> , <i>IKBK</i> . Corresponds to the recurrent Xq28 duplication reported in XLID families; <sup>55</sup> <i>GDI1</i> is the most likely candidate gene (sequencing coordinates: chrX:153222048-153514311, size 292 kb) |
| 14216_3470       | M   | X:153263157-153474401  | 211,245   | Gain     | mat         | Pathogenic     | qPCR                           | Xq28 duplication encompassing 18 genes, including 2 involved in ID: <i>GDI1</i> and <i>IKBK</i> . Recurrent Xq28 duplication involved in XLID (see above)                                                                                                                                                          |
| 6356_5           | M   | 1:2118508-2325536      | 207,029   | Loss     | dn          | Uncertain      | qPCR                           | Deletion encompassing 5 genes, including <i>SKI</i> , involved in Shprintzen-Goldberg syndrome through dominant negative mutations                                                                                                                                                                                 |
| 6317_5           | M   | 1:26767083-26941756    | 174,674   | Gain     | pat         | Uncertain      | qPCR                           | <i>ARID1A</i> partial duplication; <i>ARID1A</i> mutations reported recently in Coffin-Siris syndrome                                                                                                                                                                                                              |
| 13027_353        | F   | 2:144837809-145315383  | 477,575   | Gain     | dn          | Uncertain      | qPCR                           | <i>ZEB2</i> duplication; mutations and deletions in <i>ZEB2</i> cause Mowat-Wilson syndrome                                                                                                                                                                                                                        |

| AGP ID           | Sex | Chr:start-end (hg18)  | Size      | CNV type | Inheritance | Classification          | Validation        | CNV description                                                                                                                                                                                                                                                                                                                                                                                                                                                                                                                                                                                                |
|------------------|-----|-----------------------|-----------|----------|-------------|-------------------------|-------------------|----------------------------------------------------------------------------------------------------------------------------------------------------------------------------------------------------------------------------------------------------------------------------------------------------------------------------------------------------------------------------------------------------------------------------------------------------------------------------------------------------------------------------------------------------------------------------------------------------------------|
| 3424_3           | M   | 2:148881443-149078468 | 197,026   | Gain     | mat         | Uncertain               | qPCR              | <i>MBD5</i> partial duplication; <i>MBD5</i> is implicated in autosomal dominant ID through deletions (2q23.1 deletion syndrome) and mutations                                                                                                                                                                                                                                                                                                                                                                                                                                                                 |
| 3599_3           | F   | 6:155906594-157336808 | 1,430,215 | Gain     | pat         | Uncertain-likely benign | qPCR              | <i>ARID1B</i> partial duplication; haploinsufficiency of <i>ARID1B</i> causes ID and Coffin-Siris syndrome                                                                                                                                                                                                                                                                                                                                                                                                                                                                                                     |
| 13037_463        | M   | 9:137682721-137840339 | 157,619   | Loss     | mat         | Uncertain               | —                 | Deletion encompassing 4 genes, including <i>KCNT1</i> ; gain-of-function <i>KCNT1</i> mutations cause epilepsy                                                                                                                                                                                                                                                                                                                                                                                                                                                                                                 |
| 16072_1571036001 | M   | 11:381049-1019320     | 638,272   | Gain     | pat         | Uncertain               | qPCR              | Duplication encompassing 35 genes, including <i>HRAS</i> (involved in Costello syndrome through activating mutations); although duplication of <i>HRAS</i> is not expected to be pathogenic, the contribution of other genes in the interval is unknown                                                                                                                                                                                                                                                                                                                                                        |
| 20070_1331001    | M   | 16:14808871-15935225  | 1,126,355 | Gain     | mat         | Uncertain               | qPCR              | 16p13.11 microduplication, significance unknown. Recurrent 16p13.11 deletions are associated with variable phenotype and incomplete penetrance, and have been reported in subjects with diverse neuropsychiatric disorders, including ID, ASD, schizophrenia and epilepsy, sometimes inherited from unaffected parents. Duplications have been described in neurodevelopmental disorders and in controls, with studies reporting either no enrichment or a small but significant enrichment in cases. Further studies in larger case populations and controls are needed to clarify their role as risk factors |
| 9766_202         | M   | 16:15032942-16199484  | 1,166,543 | Gain     | mat         | Uncertain               | qPCR              | 16p13.11 microduplication (see above)                                                                                                                                                                                                                                                                                                                                                                                                                                                                                                                                                                          |
| 14142_2400       | M   | 16:15387380-16256106  | 868,727   | Gain     | pat         | Uncertain               | qPCR              | 16p13.11 microduplication (see above)                                                                                                                                                                                                                                                                                                                                                                                                                                                                                                                                                                          |
| 5258_3           | M   | 16:15387380-16270740  | 883,361   | Gain     | pat         | Uncertain               | qPCR, Illumina 1M | 16p13.11 microduplication (see above)                                                                                                                                                                                                                                                                                                                                                                                                                                                                                                                                                                          |
| 4182_1           | M   | 16:15387380-16199484  | 812,105   | Gain     | mat         | Uncertain               | —                 | 16p13.11 microduplication (see above)                                                                                                                                                                                                                                                                                                                                                                                                                                                                                                                                                                          |
| 2265_1           | M   | 16:15387380-18176669  | 2,789,290 | Gain     | mat         | Uncertain               | qPCR              | 16p13.11 microduplication (see above)                                                                                                                                                                                                                                                                                                                                                                                                                                                                                                                                                                          |
| 8703_201         | M   | 17:1092256-1249222    | 156,967   | Gain     | pat         | Uncertain-likely benign | qPCR              | Duplication of 3 genes, partially overlapping <i>YWHAE</i> ; whole duplications are pathogenic (17p13.3 duplication syndrome); there is an AGP control with a <i>YWHAE</i> partial duplication; several partial duplications reported in DGV                                                                                                                                                                                                                                                                                                                                                                   |
| 5444_3           | M   | 17:76953064-77782267  | 829,204   | Gain     | dn          | Uncertain               | qPCR              | 829 kb duplication encompassing 38 genes, including <i>ACTG1</i> (involved in Baraitser-Winter syndrome through dominant-negative or gain-of-function missense mutations); although duplication of <i>ACTG1</i> is not expected to be pathogenic, the contribution of the other genes in the interval is unknown                                                                                                                                                                                                                                                                                               |
| 14242_3660       | F   | 22:21995356-22598120  | 602,765   | Gain     | mat         | Uncertain               | —                 | 602 kb duplication encompassing 15 genes, including <i>SMARCB1</i> ; <i>SMARCB1</i> mutations reported recently in Coffin-Siris syndrome                                                                                                                                                                                                                                                                                                                                                                                                                                                                       |
| 6381_3           | M   | X:30521738-30789831   | 268,094   | Gain     | mat         | Uncertain               | qPCR              | Duplication of 2 genes, partially overlapping <i>GK</i> ; <i>GK</i> mutations and deletions cause XLID                                                                                                                                                                                                                                                                                                                                                                                                                                                                                                         |
| 5126_4           | M   | X:32948977-33330592   | 381,616   | Gain     | mat         | Uncertain               | Agilent 1M        | <i>DMD</i> duplication of exon 1 of the Dp427 transcripts; the effect of this duplication is difficult to predict; experimental evidence at the RNA level is required to interpret the significance                                                                                                                                                                                                                                                                                                                                                                                                            |
| 4356_1           | M   | X:38001148-38346471   | 345,324   | Gain     | mat         | Uncertain-likely benign | —                 | Duplication of <i>RPGR</i> , <i>OTC</i> , and <i>TSPAN7</i> ; similar duplication found in an AGP male control. <i>OTC</i> mutations and deletions cause ornithine transcarbamylase deficiency; <i>TSPAN7</i> duplications are found in healthy controls                                                                                                                                                                                                                                                                                                                                                       |
| 4152_1           | M   | X:40260354-40372806   | 112,453   | Gain     | mat         | Uncertain               | —                 | Duplication encompassing 3 genes, including <i>ATP6AP2</i> ; <i>ATP6AP2</i> silent mutation affecting splicing described in XLID with epilepsy                                                                                                                                                                                                                                                                                                                                                                                                                                                                 |
| 3240_3           | M   | X:44706702-44919064   | 212,363   | Gain     | mat         | Uncertain               | —                 | Duplication of 2 genes, partially overlapping <i>KDM6A</i> partial duplication; <i>KDM6A</i> mutations and deletions cause X-linked Kabuki syndrome                                                                                                                                                                                                                                                                                                                                                                                                                                                            |
| 14314_4310       | M   | X:70865247-71509736   | 644,490   | Gain     | mat         | Uncertain               | qPCR              | 644 kb duplication encompassing 13 genes, partially overlapping <i>HDAC8</i> ; <i>HDAC8</i> mutations described recently in Cornelia de Lange syndrome and XLID resembling Wilson-Turner syndrome; similar partial duplication of <i>HDAC8</i> observed in a male control                                                                                                                                                                                                                                                                                                                                      |
| 1348_301         | M   | X:147163528-147758700 | 595,173   | Gain     | mat         | Uncertain               | qPCR              | <i>AFF2</i> partial duplication; involved in XLID through trinucleotide expansion or deletion                                                                                                                                                                                                                                                                                                                                                                                                                                                                                                                  |
| 5036_4           | M   | X:148075334-148617551 | 542,218   | Gain     | mat         | Uncertain-likely benign | —                 | 542 kb duplication encompassing 9 genes, including <i>IDS</i> ; mutations and deletions cause mucopolysaccharidosis type II; duplication reported in unaffected males. Although duplication of <i>IDS</i> is not expected to be pathogenic, the contribution of the other genes in the interval is unknown. The duplication is also present in the proband's unaffected brother, suggesting this CNV is unlikely to be pathogenic                                                                                                                                                                              |
| 4354_1           | M   | X:148344051-148707925 | 363,875   | Gain     | mat         | Uncertain-likely benign | —                 | 363 kb duplication encompassing 9 genes, including <i>IDS</i> ; mutations and deletions cause mucopolysaccharidosis type II; duplication reported in unaffected males (see above)                                                                                                                                                                                                                                                                                                                                                                                                                              |
| 4166_1           | M   | X:151620401-151805387 | 184,987   | Gain     | mat         | Uncertain               | —                 | Xq28 duplication of 10 genes, including <i>NSDHL</i> ; mutations and deletions cause syndromic XLID (CK syndrome and CHILD syndrome); similar duplication including <i>NSDHL</i> in a male AGP control                                                                                                                                                                                                                                                                                                                                                                                                         |
| 9901_201         | M   | 3:12608293-12786824   | 178,532   | Gain     | pat         | Benign                  | —                 | Duplication of 2 genes, partially overlapping <i>RAF1</i> ; <i>RAF1</i> is involved in Noonan syndrome through activating mutations; similar duplication present in 2 AGP controls                                                                                                                                                                                                                                                                                                                                                                                                                             |
| 20087_1386001    | M   | 3:12610706-12786824   | 176,119   | Gain     | mat         | Benign                  | —                 | Duplication of 2 genes, partially overlapping <i>RAF1</i> ; <i>RAF1</i> is involved in Noonan syndrome through activating mutations; similar duplication present in 2 AGP controls                                                                                                                                                                                                                                                                                                                                                                                                                             |
| 4457_1           | M   | X:38375788-38515190   | 139,403   | Gain     | mat         | Benign                  | —                 | <i>TSPAN7</i> partial duplication; mutations and deletions cause XLID, duplications are found in healthy controls                                                                                                                                                                                                                                                                                                                                                                                                                                                                                              |
| 5524_3           | M   | X:38375788-38515190   | 139,403   | Gain     | mat         | Benign                  | —                 | <i>TSPAN7</i> partial duplication (see above)                                                                                                                                                                                                                                                                                                                                                                                                                                                                                                                                                                  |
| 6034_3           | M   | X:38375788-38515190   | 139,403   | Gain     | mat         | Benign                  | —                 | <i>TSPAN7</i> partial duplication (see above)                                                                                                                                                                                                                                                                                                                                                                                                                                                                                                                                                                  |
| 20033_1227001    | M   | X:38375788-38515190   | 139,403   | Gain     | mat         | Benign                  | —                 | <i>TSPAN7</i> partial duplication (see above)                                                                                                                                                                                                                                                                                                                                                                                                                                                                                                                                                                  |
| 20141_1396001    | M   | X:38375788-38515190   | 139,403   | Gain     | mat         | Benign                  | qPCR              | <i>TSPAN7</i> partial duplication (see above)                                                                                                                                                                                                                                                                                                                                                                                                                                                                                                                                                                  |
| 5089_5           | M   | X:53555568-53640902   | 85,335    | Gain     | mat         | Benign                  | —                 | <i>HUWE1</i> partial duplication. Whole gene duplications cause non-syndromic XLID; similar recurrent partial duplications of <i>HUWE1</i> reported recently, considered polymorphic <sup>133</sup>                                                                                                                                                                                                                                                                                                                                                                                                            |
| 17018_1          | M   | X:53568262-53640902   | 72,641    | Gain     | mat         | Benign                  | qPCR              | <i>HUWE1</i> partial duplication (see above)                                                                                                                                                                                                                                                                                                                                                                                                                                                                                                                                                                   |

## Controls

| ID                 | Sex | Chr:start-end (hg18)  | Size      | CNV type | Classification | CNV description                                                                                                                                                               |
|--------------------|-----|-----------------------|-----------|----------|----------------|-------------------------------------------------------------------------------------------------------------------------------------------------------------------------------|
| HABC_902399_902399 | F   | 1:144614719-146470277 | 1,855,559 | Loss     | "Pathogenic"   | 1q21.1 deletion syndrome                                                                                                                                                      |
| B436528_1007852654 | M   | 1:144627859-146546371 | 1,918,513 | Loss     | "Pathogenic"   | 1q21.1 deletion syndrome                                                                                                                                                      |
| B984152_1007842480 | F   | 1:144800611-145863421 | 1,062,811 | Gain     | "Pathogenic"   | 1q21.1 duplication syndrome                                                                                                                                                   |
| B618929_1007875266 | M   | 1:144933825-145518117 | 584,293   | Gain     | "Pathogenic"   | 1q21.1 duplication syndrome                                                                                                                                                   |
| B666224_1007871687 | M   | 1:144967972-145863421 | 895,450   | Gain     | "Pathogenic"   | 1q21.1 duplication syndrome                                                                                                                                                   |
| HABC_902895_902895 | F   | 2:50829989-51064129   | 234,141   | Loss     | "Pathogenic"   | <i>NRXN1</i> exonic deletion                                                                                                                                                  |
| B964957_1007872180 | F   | 7:72344426-73782113   | 1,437,688 | Gain     | "Pathogenic"   | 7q11.23 duplication syndrome (Williams syndrome region)                                                                                                                       |
| B914224_1007874975 | M   | 10:89620404-89723400  | 102,997   | Loss     | "Pathogenic"   | <i>PTEN</i> exonic deletion                                                                                                                                                   |
| HABC_902475_902475 | M   | 15:36401817-36434987  | 33,171    | Loss     | "Pathogenic"   | <i>SPRED1</i> deletion; gene involved in Legius syndrome (phenotypic overlap with neurofibromatosis 1); most individuals don't have ID and only present dermatologic findings |
| B675955_1007841005 | F   | 16:29415871-30239704  | 823,834   | Gain     | "Pathogenic"   | 16p11.2 duplication syndrome                                                                                                                                                  |
| B416484_1007875540 | M   | 16:29502984-30127026  | 624,043   | Loss     | "Pathogenic"   | 16p11.2 deletion syndrome                                                                                                                                                     |
| B879700_1007854073 | F   | 16:29502984-30127026  | 624,043   | Gain     | "Pathogenic"   | 16p11.2 duplication syndrome                                                                                                                                                  |
| HABC_900681_900681 | M   | 16:29554843-30180288  | 625,446   | Gain     | "Pathogenic"   | 16p11.2 duplication syndrome                                                                                                                                                  |

| ID                 | Sex | Chr#:start-end (hg18)  | Size      | CNV type | Classification          | CNV description                                                                                                                                                                                                                                                                                                                                                                                                                                                                                               |
|--------------------|-----|------------------------|-----------|----------|-------------------------|---------------------------------------------------------------------------------------------------------------------------------------------------------------------------------------------------------------------------------------------------------------------------------------------------------------------------------------------------------------------------------------------------------------------------------------------------------------------------------------------------------------|
| B121881_1007874637 | M   | 17:31621634-33323919   | 1,702,286 | Gain     | “Pathogenic”            | 17q12 duplication syndrome                                                                                                                                                                                                                                                                                                                                                                                                                                                                                    |
| HABC_901636_901636 | M   | 22:17248170-19795780   | 2,547,611 | Gain     | “Pathogenic”            | 22q11.2 duplication syndrome                                                                                                                                                                                                                                                                                                                                                                                                                                                                                  |
| B928258_1007854097 | F   | 22:17257787-18693299   | 1,435,513 | Gain     | “Pathogenic”            | 22q11.2 duplication syndrome                                                                                                                                                                                                                                                                                                                                                                                                                                                                                  |
| 110036016178_      | M   | 2:148753482-148819104  | 65,623    | Loss     | Uncertain               | <i>MBD5</i> exonic deletion; deletions of <i>MBD5</i> cause autosomal dominant ID, but this one overlaps only the long isoform, which has not been fully characterized and contains 5 additional non-coding exons (this deletion overlaps 1 of the non-coding exons)                                                                                                                                                                                                                                          |
| B183736_1007853714 | F   | 8:117910382-117948637  | 38,256    | Gain     | Uncertain-likely benign | <i>RAD21</i> partial duplication; mutations and deletions cause Cornelia de Lange syndrome                                                                                                                                                                                                                                                                                                                                                                                                                    |
| HABC_900405_900405 | M   | 8:117910403-117948935  | 38,533    | Gain     | Uncertain-likely benign | <i>RAD21</i> partial duplication; mutations and deletions cause Cornelia de Lange syndrome                                                                                                                                                                                                                                                                                                                                                                                                                    |
| HABC_900854_900854 | M   | 9:2018757-2080718      | 61,962    | Loss     | Uncertain-likely benign | <i>SMARCA2</i> deletion of exons 2-19, removes the translation start site in exon 2; mutations resulting in Nicolaides-Baraitser syndrome are thought to act through a dominant-negative or gain-of-function manner and cluster in exons 15–25; deletions encompassing <i>SMARCA2</i> do not cause this syndrome, except for one reported in-frame deletion overlapping the mutation-clustering region. The deletion in the AGP control involves exons 2-19 and removes the translation start site in exon 2. |
| B116679_1007853952 | M   | 9:129475725-129875601  | 399,877   | Gain     | Uncertain               | Duplication encompassing 19 genes, partially overlapping <i>STXBP1</i> ; mutations and deletions of <i>STXBP1</i> cause nonsyndromic ID with epilepsy and infantile epileptic encephalopathy                                                                                                                                                                                                                                                                                                                  |
| B246752_1007872634 | F   | 9:139616009-139725155  | 109,147   | Gain     | Uncertain               | Duplication encompassing 3 genes, partially overlapping <i>EHMT1</i> ; <i>EHMT1</i> mutations and deletions cause Kleefstra syndrome                                                                                                                                                                                                                                                                                                                                                                          |
| B252606_1007874475 | M   | 12:1889583-2538831     | 649,249   | Gain     | Uncertain               | Duplication encompassing 4 genes, partially overlapping <i>CACNA1C</i> , involved in Timothy syndrome through activating mutations                                                                                                                                                                                                                                                                                                                                                                            |
| B936611_1007853579 | F   | 12:25087733-25286046   | 198,314   | Gain     | Uncertain               | Duplication encompassing 4 genes, partially overlapping <i>KRAS</i> ; <i>KRAS</i> is involved in cardio-facio-cutaneous syndrome through activating mutations                                                                                                                                                                                                                                                                                                                                                 |
| B978305_1007874920 | M   | 13:109744730-110078003 | 333,274   | Gain     | Uncertain               | Duplication encompassing 4 genes, partially overlapping <i>COL4A1</i> ; only <i>COL4A1</i> missense mutations reported thus far, no deletions or duplications                                                                                                                                                                                                                                                                                                                                                 |
| B777599_1007853701 | F   | 14:101564897-101608061 | 43165     | Gain     | Uncertain               | <i>DYNC1H1</i> partial duplication; all mutations identified so far (ID with neuronal migration defects and motor neuropathies) are heterozygous missense mutations, suggesting a dominant-negative effect                                                                                                                                                                                                                                                                                                    |
| HABC_900744_900744 | F   | 15:28723577-30232287   | 1,508,711 | Gain     | Uncertain               | 15q13.3 microduplication                                                                                                                                                                                                                                                                                                                                                                                                                                                                                      |
| HABC_901557_901557 | F   | 15:28730804-30389965   | 1,659,162 | Gain     | Uncertain               | 15q13.3 microduplication                                                                                                                                                                                                                                                                                                                                                                                                                                                                                      |
| B833125_0057060983 | F   | 16:1995854-2052977     | 57,124    | Gain     | Uncertain               | Duplication encompassing 5 genes, partially overlapping <i>TSC2</i> ; <i>TSC2</i> mutations and deletions cause tuberous sclerosis                                                                                                                                                                                                                                                                                                                                                                            |
| HABC_902940_902940 | M   | 16:14831165-16199484   | 1,368,320 | Gain     | Uncertain               | 16p13.11 microduplication                                                                                                                                                                                                                                                                                                                                                                                                                                                                                     |
| HABC_901197_901197 | F   | 16:14882793-16199484   | 1,316,692 | Gain     | Uncertain               | 16p13.11 microduplication                                                                                                                                                                                                                                                                                                                                                                                                                                                                                     |
| HABC_902864_902864 | M   | 16:14977368-16190572   | 1,213,205 | Gain     | Uncertain               | 16p13.11 microduplication                                                                                                                                                                                                                                                                                                                                                                                                                                                                                     |
| HABC_902897_902897 | M   | 16:15387380-18075924   | 2,688,545 | Gain     | Uncertain               | 16p13.11 microduplication                                                                                                                                                                                                                                                                                                                                                                                                                                                                                     |
| HABC_901863_901863 | F   | 16:87658525-87896679   | 238,155   | Gain     | Uncertain               | <i>CDH15</i> duplication and <i>ANKRD11</i> partial duplication; <i>CDH15</i> is involved in non syndromic ID through mutations and <i>ANKRD11</i> in KBG syndrome through mutations and deletions                                                                                                                                                                                                                                                                                                            |
| HABC_901829_901829 | F   | 16:87729306-87962759   | 233,454   | Gain     | Uncertain               | <i>CDH15</i> duplication and <i>ANKRD11</i> partial duplication (see above)                                                                                                                                                                                                                                                                                                                                                                                                                                   |
| HABC_902145_902145 | F   | 17:1136077-1211814     | 75,738    | Gain     | Uncertain-likely benign | Duplication of 2 genes, partially overlapping <i>YWHAE</i> ; <i>YWHAE</i> whole gene duplications are pathogenic; several partial duplications in DGV                                                                                                                                                                                                                                                                                                                                                         |
| HABC_902046_902046 | M   | 17:2437871-2476338     | 38,468    | Gain     | Uncertain               | <i>PAFAH1B1</i> partial duplication; whole gene duplications are pathogenic                                                                                                                                                                                                                                                                                                                                                                                                                                   |
| HABC_901640_901640 | M   | 22:21320275-23360745   | 2,040,471 | Gain     | Uncertain               | 2 Mb duplication encompassing 44 genes, including <i>SMARCB1</i> ; <i>SMARCB1</i> mutations reported in Coffin-Siris syndrome                                                                                                                                                                                                                                                                                                                                                                                 |
| B278753_1007874641 | M   | 22:21995356-22676385   | 681,030   | Gain     | Uncertain               | 681 kb duplication encompassing 20 genes, including <i>SMARCB1</i> ; <i>SMARCB1</i> mutations reported in Coffin-Siris syndrome                                                                                                                                                                                                                                                                                                                                                                               |
| HABC_900402_900402 | F   | X:11038333-11069582    | 31,250    | Gain     | Uncertain-likely benign | Duplication of 2 genes, including <i>HCCS</i> ; <i>HCCS</i> mutations and deletions cause a syndromic form of XLID                                                                                                                                                                                                                                                                                                                                                                                            |
| HABC_902971_902971 | F   | X:13633067-13700254    | 67,188    | Gain     | Uncertain-likely benign | Duplication encompassing 4 genes, including <i>OFD1</i> ; mutations and deletions cause syndromic XLID                                                                                                                                                                                                                                                                                                                                                                                                        |
| HABC_901634_901634 | M   | X:17239813-17435795    | 195,983   | Gain     | Uncertain-likely benign | <i>NHS</i> partial duplication; mutations and deletions cause Nance-Horan syndrome                                                                                                                                                                                                                                                                                                                                                                                                                            |
| HABC_902647_902647 | M   | X:18574793-18780863    | 206,071   | Gain     | Uncertain-likely benign | Xp22.13 duplication encompassing 3 genes, partially overlapping <i>CDKL5</i> ; <i>CDKL5</i> mutations and deletions cause epileptic encephalopathy                                                                                                                                                                                                                                                                                                                                                            |
| HABC_900416_900416 | M   | X:38013482-38643203    | 629,722   | Gain     | Uncertain-likely benign | Duplication encompassing 4 genes, including <i>OTC</i> and <i>TSPAN7</i> . <i>OTC</i> mutations and deletions cause ornithine transcarbamylase deficiency; no cases have been reported with a duplication. <i>TSPAN7</i> mutations and deletions cause XLID, duplications are found in healthy controls                                                                                                                                                                                                       |
| B345605_1007844543 | M   | X:71239825-71490721    | 250,897   | Gain     | Uncertain-likely benign | Duplication encompassing 8 genes, partially overlapping <i>HDAC8</i> ; <i>HDAC8</i> mutations described recently in Cornelia de Lange syndrome and XLID                                                                                                                                                                                                                                                                                                                                                       |
| HABC_900366_900366 | F   | X:76924341-77030430    | 106,090   | Gain     | Uncertain-likely benign | Partial duplication of <i>ATRX</i> and <i>MAGT1</i> ; <i>ATRX</i> is involved in XLID through mutations or deletions                                                                                                                                                                                                                                                                                                                                                                                          |
| HABC_900333_900333 | F   | X:134903813-135264655  | 360,843   | Gain     | Uncertain               | Xq26.3 duplication encompassing 4 genes, partially overlapping <i>SLC9A6</i> ; mutations and deletions cause syndromic XLID (Christianson syndrome)                                                                                                                                                                                                                                                                                                                                                           |
| B418695_1007840289 | M   | X:151644548-151839695  | 195,148   | Gain     | Uncertain               | Xq28 duplication encompassing 10 genes, including <i>NSDHL</i> ; <i>NSDHL</i> mutations and deletions cause XLID (CK syndrome and CHLD syndrome); several overlapping duplications reported in DGV                                                                                                                                                                                                                                                                                                            |
| HABC_902725_902725 | F   | X:153340432-153435070  | 94,639    | Gain     | Uncertain-likely benign | 95 kb duplication encompassing 7 genes, partially overlapping <i>IKBKG</i> ; only mutations, deletions and intragenic duplications described                                                                                                                                                                                                                                                                                                                                                                  |
| HABC_902313_902313 | M   | X:153440007-153622054  | 182,048   | Gain     | Uncertain-likely benign | 182 kb duplication encompassing 7 genes, partially overlapping <i>IKBKG</i> ; only mutations, deletions and intragenic duplications described                                                                                                                                                                                                                                                                                                                                                                 |
| HABC_901807_901807 | M   | 3:12608293-12781123    | 172,831   | Gain     | Benign                  | Duplication encompassing 2 genes, partially overlapping <i>RAF1</i> ; <i>RAF1</i> is involved in Noonan syndrome through activating mutations                                                                                                                                                                                                                                                                                                                                                                 |
| B260038_1007841400 | F   | 3:12610706-12781123    | 170,418   | Gain     | Benign                  | Duplication encompassing 2 genes, partially overlapping <i>RAF1</i> ; <i>RAF1</i> is involved in Noonan syndrome through activating mutations                                                                                                                                                                                                                                                                                                                                                                 |
| B630497_1007872229 | F   | 12:2085709-2127756     | 42,048    | Loss     | Benign                  | <i>CACNA1C</i> deletion; <i>CACNA1C</i> causes Timothy syndrome through activating mutations                                                                                                                                                                                                                                                                                                                                                                                                                  |
| B131548_1007842659 | F   | 12:2663790-2714138     | 50,349    | Gain     | Benign                  | <i>CACNA1C</i> partial duplication; <i>CACNA1C</i> causes Timothy syndrome through activating mutations                                                                                                                                                                                                                                                                                                                                                                                                       |
| HABC_902939_902939 | F   | 12:2675893-2717980     | 42,088    | Gain     | Benign                  | <i>CACNA1C</i> partial duplication; <i>CACNA1C</i> causes Timothy syndrome through activating mutations                                                                                                                                                                                                                                                                                                                                                                                                       |
| 110036016517_      | M   | X:38375788-38515190    | 139,403   | Gain     | Benign                  | <i>TSPAN7</i> partial duplication; mutations and deletions cause XLID, duplications are found in healthy controls                                                                                                                                                                                                                                                                                                                                                                                             |
| B818627_1007854359 | M   | X:38375788-38515190    | 139,403   | Gain     | Benign                  | <i>TSPAN7</i> partial duplication; mutations and deletions cause XLID, duplications are found in healthy controls                                                                                                                                                                                                                                                                                                                                                                                             |

This table shows the CNVs overlapping ASD/ID genes and loci interpreted as pathogenic, uncertain or benign in cases and controls of all ancestries. Phenotype information and CNV segregation in siblings can be found in **Table S8**. In order to compare the burden of CNVs overlapping ASD/ID genes and loci in cases and controls (**Figures 1 and S1**), CNVs were interpreted irrespective of affected status. A small number of CNVs that would have been considered pathogenic in an affected individual were identified among controls; all were CNVs known to be associated with incomplete penetrance/variable expressivity.

Abbreviations: DGV, Database of Genomic Variants; dn, *de novo*; F, female; ID, intellectual disability; LR-PCR, long range PCR; M, male; mat, maternal; MLPA, multiplex ligation-dependent probe amplification; pat, paternal; qPCR, quantitative PCR; XLID, X-linked intellectual disability. —, no validation attempted, CNV confirmed by visual inspection.

**Table S7B. Pathogenic CNVs in affected subjects (all ancestries)**

Pathogenic CNVs overlapping ASD/ID genes or loci (stringent CNV, >30 kb) n = 64

| AGP ID            | Sex | Family type | Cytoband        | Chr#:start-end (hg18)  | Size      | CNV type | Inheritance    | CNV description                                                                                                                                                                                                                                                                              | Classification/penetrance/expressivity <sup>§</sup> |
|-------------------|-----|-------------|-----------------|------------------------|-----------|----------|----------------|----------------------------------------------------------------------------------------------------------------------------------------------------------------------------------------------------------------------------------------------------------------------------------------------|-----------------------------------------------------|
| 16035_1571013001  | M   | Familial    | 1q21.1          | 1:144482933-146325557  | 1,842,625 | Gain     | <i>De novo</i> | 1q21.1 duplication syndrome                                                                                                                                                                                                                                                                  | VE/IP                                               |
| 1952_301          | M   | Familial    | 1q21.1          | 1:144500467-146336720  | 1,836,254 | Gain     | <i>De novo</i> | 1q21.1 duplication syndrome                                                                                                                                                                                                                                                                  | VE/IP                                               |
| 8635_201          | M   | Familial    | 1q21.1          | 1:144500467-146377870  | 1,877,404 | Loss     | <i>De novo</i> | 1q21.1 deletion syndrome                                                                                                                                                                                                                                                                     | VE/IP                                               |
| 13135_1523        | F   | Unknown     | 1q21.1          | 1:144838594-146308287  | 1,469,694 | Gain     | <i>De novo</i> | 1q21.1 duplication syndrome                                                                                                                                                                                                                                                                  | VE/IP                                               |
| 4291_1            | M   | Familial    | 1q21.1          | 1:144967972-146317915  | 1,349,944 | Gain     | Maternal       | 1q21.1 duplication syndrome                                                                                                                                                                                                                                                                  | VE/IP                                               |
| 16074_1571042001† | M   | Sporadic    | 2p16.3          | 2:50037898-50407550    | 369,653   | Loss     | Maternal       | <i>NRXN1</i> exonic deletion                                                                                                                                                                                                                                                                 | VE/IP                                               |
| 14068_1180        | M   | Sporadic    | 2p16.3          | 2:50493827-50677835    | 184,009   | Gain     | <i>De novo</i> | <i>NRXN1</i> intragenic duplication, predicted to result in a premature truncated protein                                                                                                                                                                                                    | VE/IP                                               |
| 13017_223         | F   | Sporadic    | 2p16.3          | 2:50539877-50730546    | 190,670   | Loss     | <i>De novo</i> | <i>NRXN1</i> exonic deletion                                                                                                                                                                                                                                                                 | VE/IP                                               |
| 13216_2383        | M   | Unknown     | 2p16.3          | 2:50968208-51214171    | 245,964   | Loss     | <i>De novo</i> | <i>NRXN1</i> exonic deletion                                                                                                                                                                                                                                                                 | VE/IP                                               |
| 13153_1703        | M   | Sporadic    | 2p16.3          | 2:50990306-51222043    | 231,738   | Loss     | <i>De novo</i> | <i>NRXN1</i> exonic deletion                                                                                                                                                                                                                                                                 | VE/IP                                               |
| 13037_463         | M   | Sporadic    | 2p16.3          | 2:51002576-51157742    | 155,167   | Loss     | <i>De novo</i> | <i>NRXN1</i> exonic deletion                                                                                                                                                                                                                                                                 | VE/IP                                               |
| 17027_1           | M   | Familial    | 2p16.3          | 2:51076611-51147600    | 70,990    | Loss     | Paternal       | <i>NRXN1</i> exonic deletion                                                                                                                                                                                                                                                                 | VE/IP                                               |
| 5353_3            | F   | Sporadic    | 6p21.32         | 6:33399849-33512042    | 112,194   | Loss     | <i>De novo</i> | <i>SYNGAP1</i> exonic deletion                                                                                                                                                                                                                                                               | HP                                                  |
| 5386_3            | M   | Familial    | 6q25.3          | 6:156785155-158489874  | 1,704,720 | Loss     | <i>De novo</i> | <i>ARID1B</i> exonic deletion                                                                                                                                                                                                                                                                | HP                                                  |
| 8446_201          | M   | Sporadic    | 7q11.23         | 7:72344426-73782113    | 1,437,688 | Loss     | <i>De novo</i> | Williams syndrome (7q11.23 deletion)                                                                                                                                                                                                                                                         | HP                                                  |
| 13123_1403        | F   | Sporadic    | 9p24.3-p24.2    | 9:98998-3682923        | 3,583,926 | Loss     | <i>De novo</i> | Terminal 9p deletion, 3.58 Mb (14 genes)                                                                                                                                                                                                                                                     | HP                                                  |
| 6259_3            | M   | Sporadic    | 9q34.3          | 9:139516033-140208462  | 692,430   | Loss     | <i>De novo</i> | Kleefstra syndrome (9q34.3 deletion including <i>EHMT1</i> )                                                                                                                                                                                                                                 | HP                                                  |
| 6325_3            | M   | Sporadic    | 11q13.3         | 11:70077507-70506315   | 428,809   | Loss     | <i>De novo</i> | <i>SHANK2</i> exonic deletion <sup>129</sup>                                                                                                                                                                                                                                                 | HP                                                  |
| 6319_3            | M   | Sporadic    | 11q13.3         | 11:70119917-70187872   | 67,956    | Loss     | <i>De novo</i> | <i>SHANK2</i> exonic deletion <sup>117,129</sup>                                                                                                                                                                                                                                             | HP                                                  |
| 5237_3            | M   | Sporadic    | 11q13.3-q13.4   | 11:70154458-70220632   | 66,175    | Loss     | <i>De novo</i> | <i>SHANK2</i> exonic deletion <sup>117,134</sup>                                                                                                                                                                                                                                             | HP                                                  |
| 6240_4            | M   | Sporadic    | 11q24.2-q25     | 11:126633939-132060374 | 5,426,436 | Loss     | <i>De novo</i> | Chromosome 11q deletion syndrome (Jacobsen syndrome)                                                                                                                                                                                                                                         | HP                                                  |
| 20187_1464001     | M   | Sporadic    | 15q11.2-q13.1   | 15:18811937-26209270   | 7,397,334 | Gain     | <i>De novo</i> | 15q11-q13 duplication syndrome, maternally derived                                                                                                                                                                                                                                           | VE/IP                                               |
| 8630_201          | M   | Familial    | 15q11.2-q13.1   | 15:19800798-26209270   | 6,408,473 | Gain     | <i>De novo</i> | 15q11-q13 duplication syndrome, paternally derived                                                                                                                                                                                                                                           | VE/IP                                               |
| 20069_1328001     | M   | Sporadic    | 15q11.2-q13.1   | 15:20203578-26209270   | 6,005,693 | Gain     | <i>De novo</i> | 15q11-q13 duplication syndrome, maternally derived                                                                                                                                                                                                                                           | VE/IP                                               |
| 17035_1           | F   | Sporadic    | 15q11.2-q13.1   | 15:20274130-26120360   | 5,846,231 | Gain     | <i>De novo</i> | 15q11-q13 duplication syndrome, maternally derived                                                                                                                                                                                                                                           | VE/IP                                               |
| 8117_202          | M   | Familial    | 15q11.2-q13.1   | 15:21168391-26217954   | 5,049,564 | Gain     | Maternal       | 15q11-q13 duplication syndrome, maternally derived                                                                                                                                                                                                                                           | VE/IP                                               |
| 8741_201          | F   | Familial    | 15q11.2-q13.1   | 15:21168391-26315093   | 5,146,703 | Gain     | Maternal       | 15q11-q13 duplication syndrome, maternally derived                                                                                                                                                                                                                                           | VE/IP                                               |
| 13050_593         | M   | Sporadic    | 15q11.2-q13.1   | 15:21190624-26203954   | 5,013,331 | Gain     | <i>De novo</i> | 15q11-q13 duplication syndrome, maternally derived                                                                                                                                                                                                                                           | VE/IP                                               |
| 1950_301          | M   | Familial    | 15q13.1-q13.3   | 15:26762141-30436163   | 3,674,023 | Loss     | Maternal       | 15q13.3 deletion syndrome                                                                                                                                                                                                                                                                    | VE/IP                                               |
| 16040_1571029001  | M   | Familial    | 15q13.2-q13.3   | 15:28450423-30303265   | 1,852,843 | Loss     | <i>De novo</i> | 15q13.3 deletion syndrome                                                                                                                                                                                                                                                                    | VE/IP                                               |
| 14167_2720        | M   | Sporadic    | 15q13.2-q13.3   | 15:28705540-30436163   | 1,730,624 | Loss     | Paternal       | 15q13.3 deletion syndrome                                                                                                                                                                                                                                                                    | VE/IP                                               |
| 18100_302         | M   | Familial    | 15q13.2-q13.3   | 15:28714502-30303265   | 1,588,764 | Loss     | Paternal       | 15q13.3 deletion syndrome                                                                                                                                                                                                                                                                    | VE/IP                                               |
| 5537_3            | M   | Familial    | 15q13.2-q13.3   | 15:82722026-83529838   | 807,813   | Loss     | Maternal       | Distal 15q25.2 deletion syndrome                                                                                                                                                                                                                                                             | VE/IP                                               |
| 14283_4060        | M   | Sporadic    | 16p13.11        | 16:14771033-16307313   | 1,536,281 | Loss     | Maternal       | 16p13.11 deletion syndrome                                                                                                                                                                                                                                                                   | VE/IP                                               |
| 3441_3            | M   | Sporadic    | 16p13.11        | 16:14808871-16215852   | 1,406,982 | Loss     | Paternal       | 16p13.11 deletion syndrome                                                                                                                                                                                                                                                                   | VE/IP                                               |
| 14412_5210        | M   | Sporadic    | 16p13.11        | 16:14960247-16307313   | 1,347,067 | Loss     | Maternal       | 16p13.11 deletion syndrome                                                                                                                                                                                                                                                                   | VE/IP                                               |
| 2204_1            | M   | Sporadic    | 16p11.2         | 16:29466569-30147029   | 680,461   | Loss     | <i>De novo</i> | 16p11.2 deletion syndrome                                                                                                                                                                                                                                                                    | VE/IP                                               |
| 3544_3            | M   | Familial    | 16p11.2         | 16:29499858-30107306   | 607,449   | Gain     | Maternal       | 16p11.2 duplication syndrome                                                                                                                                                                                                                                                                 | VE/IP                                               |
| 20089_1391001     | M   | Sporadic    | 16p11.2         | 16:29502984-30107306   | 604,323   | Loss     | <i>De novo</i> | 16p11.2 deletion syndrome                                                                                                                                                                                                                                                                    | VE/IP                                               |
| 5068_3            | F   | Familial    | 16p11.2         | 16:29502984-30127026   | 624,043   | Loss     | <i>De novo</i> | 16p11.2 deletion syndrome, 50% mosaicism                                                                                                                                                                                                                                                     | VE/IP                                               |
| 5262_4            | M   | Sporadic    | 16p11.2         | 16:29502984-30210849   | 707,866   | Gain     | <i>De novo</i> | 16p11.2 duplication syndrome                                                                                                                                                                                                                                                                 | VE/IP                                               |
| 3211_3            | M   | Familial    | 16p11.2         | 16:29502984-30127026   | 624,043   | Gain     | Maternal       | 16p11.2 duplication syndrome                                                                                                                                                                                                                                                                 | VE/IP                                               |
| 5359_4            | M   | Sporadic    | 16p11.2         | 16:29554843-30195224   | 640,382   | Loss     | <i>De novo</i> | 16p11.2 deletion syndrome                                                                                                                                                                                                                                                                    | VE/IP                                               |
| 20127_4014001     | M   | Sporadic    | 16p11.2         | 16:29554843-30130862   | 576,020   | Loss     | Paternal       | 16p11.2 deletion syndrome                                                                                                                                                                                                                                                                    | VE/IP                                               |
| 4030_1            | M   | Familial    | 16p11.2         | 16:29554843-30107306   | 552,464   | Gain     | <i>De novo</i> | 16p11.2 duplication syndrome                                                                                                                                                                                                                                                                 | VE/IP                                               |
| 3439_3            | M   | Sporadic    | 17p11.2         | 17:17156307-18262979   | 1,106,673 | Loss     | <i>De novo</i> | Smith-Magenis syndrome (17p11.2 deletion including <i>RAI1</i> )                                                                                                                                                                                                                             | HP                                                  |
| 2211_1            | F   | Sporadic    | 17p11.2         | 17:17169258-20101517   | 2,932,260 | Loss     | <i>De novo</i> | Smith-Magenis syndrome (17p11.2 deletion including <i>RAI1</i> )                                                                                                                                                                                                                             | HP                                                  |
| 14315_4320        | M   | Sporadic    | 17q12           | 17:31621634-33323919   | 1,702,286 | Gain     | Maternal       | 17q12 duplication syndrome                                                                                                                                                                                                                                                                   | VE/IP                                               |
| 3183_7            | M   | Familial    | 22q11.21        | 22:17241748-19819918   | 2,578,171 | Loss     | <i>De novo</i> | 22q11.2 deletion syndrome                                                                                                                                                                                                                                                                    | VE/IP                                               |
| 17015_1           | M   | Sporadic    | 22q11.21        | 22:17257787-19795780   | 2,537,994 | Loss     | <i>De novo</i> | 22q11.2 deletion syndrome                                                                                                                                                                                                                                                                    | VE/IP                                               |
| 8627_201          | M   | Sporadic    | 22q11.21        | 22:17257787-19793730   | 2,535,944 | Gain     | <i>De novo</i> | 22q11.2 duplication syndrome                                                                                                                                                                                                                                                                 | VE/IP                                               |
| 4271_1            | M   | Sporadic    | 22q11.21        | 22:17257787-19795780   | 2,537,994 | Gain     | <i>De novo</i> | 22q11.2 duplication syndrome                                                                                                                                                                                                                                                                 | VE/IP                                               |
| 16074_1571042001† | M   | Sporadic    | 22q11.21        | 22:17257787-19793730   | 2,535,944 | Gain     | Paternal       | 22q11.2 duplication syndrome                                                                                                                                                                                                                                                                 | VE/IP                                               |
| 3127_4            | M   | Familial    | 22q11.21        | 22:17257787-19793730   | 2,535,944 | Gain     | Paternal       | 22q11.2 duplication syndrome                                                                                                                                                                                                                                                                 | VE/IP                                               |
| 5261_4            | F   | Familial    | 22q11.21        | 22:17257787-19795780   | 2,537,994 | Gain     | Paternal       | 22q11.2 duplication syndrome                                                                                                                                                                                                                                                                 | VE/IP                                               |
| 2072_1            | M   | Familial    | 22q13.31-q13.33 | 22:45159185-49582267   | 4,423,083 | Loss     | <i>De novo</i> | Phelan-McDermid syndrome (22q13 deletion including <i>SHANK3</i> ) <sup>130,135</sup>                                                                                                                                                                                                        | HP                                                  |
| 6130_4            | F   | Sporadic    | 22q13.32-q13.33 | 22:47996161-49512530   | 1,516,370 | Loss     | <i>De novo</i> | Phelan-McDermid syndrome (22q13 deletion including <i>SHANK3</i> )                                                                                                                                                                                                                           | HP                                                  |
| 16079_1571066001  | M   | Sporadic    | 22q13.33        | 22:49470371-49567383   | 97,013    | Loss     | <i>De novo</i> | Phelan-McDermid syndrome (22q13 deletion including <i>SHANK3</i> )                                                                                                                                                                                                                           | HP                                                  |
| 5240_4            | M   | Familial    | Xp22.11         | X:23116188-23280628    | 164,441   | Loss     | Maternal       | <i>PTCHD1</i> exonic deletion <sup>136,137</sup>                                                                                                                                                                                                                                             | — (sex chr)                                         |
| 5126_4            | M   | Familial    | Xp21.3          | X:28931559-29478966    | 547,408   | Gain     | Maternal       | <i>ILIRAPL1</i> intragenic duplication of exons 3-5                                                                                                                                                                                                                                          | — (sex chr)                                         |
| 8597_201          | M   | Sporadic    | Xp21.2-p21.1    | X:31303978-32025062    | 721,085   | Loss     | Maternal       | <i>DMD</i> deletion of exons 45-60                                                                                                                                                                                                                                                           | — (sex chr)                                         |
| 3019_3            | M   | Familial    | Xp21.1          | X:32100618-32315937    | 215,320   | Gain     | Maternal       | <i>DMD</i> duplication of exons 31-44 (sequencing coordinates: chrX:32097213-32321945, size: 224733 bp) <sup>138</sup>                                                                                                                                                                       | — (sex chr)                                         |
| 20013_1075001     | M   | Sporadic    | Xq28            | X:153239048-153521797  | 282,750   | Gain     | <i>De novo</i> | Xq28 duplication encompassing 20 genes, including 3 involved in ID: <i>FLNA</i> , <i>GDI1</i> , <i>IKBK</i> . Recurrent Xq28 duplication implicated in XLID; <i>GDI1</i> is the most likely candidate gene <sup>55</sup> (sequencing coordinates: chrX:153,222,048-153,514,311, size 292 kb) | — (sex chr)                                         |
| 14216_3470        | M   | Sporadic    | Xq28            | X:153263157-153474401  | 211,245   | Gain     | Maternal       | Xq28 duplication encompassing 18 genes, including 2 involved in ID: <i>GDI1</i> & <i>IKBK</i> . Recurrent Xq28 duplication implicated in XLID; <i>GDI1</i> is the most likely candidate gene                                                                                                 | — (sex chr)                                         |

Other pathogenic CNVs, including large *de novo* CNVs as well as CNVs not included in the main analyses (chromosomal abnormalities, CNVs <30 kb, non stringent CNVs or CNVs identified with 1 algorithm only and validated), n = 20

| AGP ID           | Sex | Family type | Cytoband        | Chr#:start-end (hg18) | Size        | CNV type | Inheritance    | CNV description                                                                                                                                                                                                                                                                                                                                                                                                                                                                                                                                                                                                               | Classification penetrance/expressivity <sup>§</sup> |
|------------------|-----|-------------|-----------------|-----------------------|-------------|----------|----------------|-------------------------------------------------------------------------------------------------------------------------------------------------------------------------------------------------------------------------------------------------------------------------------------------------------------------------------------------------------------------------------------------------------------------------------------------------------------------------------------------------------------------------------------------------------------------------------------------------------------------------------|-----------------------------------------------------|
| 8658_201         | F   | Sporadic    | 1p21.3-p21.2    | 1:98175622-100923952  | 2,748,331   | Loss     | <i>De novo</i> | 2.7 Mb 1p21.3-p21.2 deletion, <i>de novo</i> (18 genes, including <i>DPYD</i> and <i>MIR137</i> ). 1p21.3 microdeletions comprising <i>DPYD</i> and <i>MIR137</i> have been reported in subjects with ID                                                                                                                                                                                                                                                                                                                                                                                                                      | — (novel region)                                    |
| 5467_3           | M   | Sporadic    | 1q42.3-q44      | 1:233476547-247165725 | 13,689,179  | Gain     | <i>De novo</i> | 13.7 Mb 1q42.3-q44 duplication, <i>de novo</i> (114 genes). This CNV overlaps the critical region of the 1q43-q44 deletion syndrome. Distal duplications of the long arm of chromosome 1 are rare, reported in few individuals in its pure form ( <a href="#">chromosome abnormality</a> )                                                                                                                                                                                                                                                                                                                                    | HP                                                  |
| 5236_3           | F   | Familial    | 2p16.3          | 2:50705521-50719594   | 14,074      | Loss     | Maternal       | <i>NRXN1</i> exonic deletion (CNV is exonic according to RefSeq, but not to UCSC) (<30 kb, non stringent: QSNP PCNV)                                                                                                                                                                                                                                                                                                                                                                                                                                                                                                          | VE/IP                                               |
| 5328_3           | M   | Sporadic    | 2p16.3          | 2:51044181-51120644   | 76,464      | Loss     | Paternal       | <i>NRXN1</i> exonic deletion (non stringent: QSNP PCNV)                                                                                                                                                                                                                                                                                                                                                                                                                                                                                                                                                                       | VE/IP                                               |
| 16037_1571015001 | M   | Sporadic    | 2q37.3          | 2:239765200-239777909 | 12,710      | Loss     | Maternal       | <i>HDAC4</i> small intragenic deletion. <i>HDAC4</i> is responsible for some of the features of the 2q37 deletion syndrome (brachydactyly mental retardation syndrome). There are many 2q37 deletions reported in individuals with ASD, but no mutations or single gene deletions of <i>HDAC4</i> had been reported in ASD. (sequencing coordinates: chr2:239766528-239778481, size 11954 bp) (<30 kb)                                                                                                                                                                                                                        | VE/IP                                               |
| 21020_1†         | M   | Sporadic    | 4p16.3-p16.1    | 4:53403-9016339       | 8,962,937   | Gain     | <i>De novo</i> | <i>De novo</i> unbalanced translocation leading to 4p16.3-p16.1 duplication and 8p23.3-p23.1 deletion. The 4p duplication spans 8.9 Mb and involves the region implicated in Wolf-Hirschhorn syndrome. Normal 46,XY karyotype, unbalanced translocation shown by FISH ( <a href="#">chromosome abnormality</a> )                                                                                                                                                                                                                                                                                                              | HP                                                  |
| 21020_1‡         | M   | Sporadic    | 8p23.3-p23.1    | 8:154984-6994825      | 6,839,842   | Loss     | <i>De novo</i> | <i>De novo</i> unbalanced translocation leading to 4p16.3-p16.1 duplication and 8p23.3-p23.1 deletion (see above). The 8p terminal deletion spans 6.8 Mb; numerous terminal deletions of 8p have been described in the literature in subjects with ID, behavioral issues and mild dysmorphic features ( <a href="#">chromosome abnormality</a> )                                                                                                                                                                                                                                                                              | HP                                                  |
| 14270_3930       | F   | Sporadic    | 6q25.3-q27      | 6:160773919-170761395 | 9,987,477   | Gain     | <i>De novo</i> | 10 Mb duplication 6q25.3-q27, <i>de novo</i> , 46,XX,ish der(22)t(6;22)(6q25.3;p11.2)pat(6qtel+). "6q duplication syndrome" is a rare cytogenetic abnormality reported in few individuals in its pure form; the duplications can affect any part of the 6q arm and few overlap. Most of the reported cases are the result of abnormal segregation of a balanced translocation carried by a parent, like in this case ( <a href="#">chromosome abnormality</a> )                                                                                                                                                               | HP                                                  |
| 8404_201         | M   | Familial    | 6q27            | 6:169136788-170761395 | 1,624,608   | Loss     | <i>De novo</i> | 1.6 Mb <i>de novo</i> deletion in 6q27 region (14 genes). Terminal 6q deletion syndrome. The CNV contains <i>DLI1</i> , an ASD candidate gene: <i>de novo</i> frameshift variant identified in ASD exome study <sup>4</sup>                                                                                                                                                                                                                                                                                                                                                                                                   | HP                                                  |
| 13137_1543       | F   | Sporadic    | 8p12-8q12.1     | 8:31928590-58996070   | 27,067,481  | Gain     | <i>De novo</i> | 27 Mb pericentromeric duplication 8p12-8q12.1, <i>de novo</i> . The karyotype revealed a mosaic supernumerary ring chromosome (47, XX, +r[10]/46, XX[70]) of unknown origin, shown to involve chr 8 by SNP array. Trisomy 8 syndrome is characterized by mild to severe mental and growth deficiency, facial dysmorphisms, and limb abnormalities. In cases of supernumerary marker chromosomes or supernumerary ring chromosomes derived from chr 8, mosaic or non-mosaic, the clinical presentation varies from normal phenotype to features overlapping the trisomy 8 syndrome. ( <a href="#">chromosome abnormality</a> ) | HP                                                  |
| 8534_201         | M   | Sporadic    | 10q11.21-q11.23 | 10:45633089-51564756  | 5,931,668   | Loss     | <i>De novo</i> | 5.9 Mb 10q11.22-q11.23 deletion (56 genes), <i>de novo</i> . Recurrent deletions in this region are associated with variable clinical features, with ID as the only feature present in the majority of individuals; most deletions are inherited from apparently normal parents, indicating variable expressivity/incomplete penetrance <sup>139</sup>                                                                                                                                                                                                                                                                        | VE/IP                                               |
| 4312_1           | M   | Sporadic    | 10q11.21-q11.23 | 10:45550419-51496386  | 5,945,968   | Loss     | Paternal       | 5.9 Mb 10q11.22-q11.23 deletion (56 genes), paternal. Recurrent deletion (see above)                                                                                                                                                                                                                                                                                                                                                                                                                                                                                                                                          | VE/IP                                               |
| 6053_3           | M   | Familial    | 12q13.3-q14.1   | 12:54218922-58779615  | 4,560,694   | Gain     | <i>De novo</i> | 4.5 Mb <i>de novo</i> duplication in 12q13 (101 genes); no similar CNV reported                                                                                                                                                                                                                                                                                                                                                                                                                                                                                                                                               | — (novel region)                                    |
| 14070_1230       | M   | Familial    | 15q26.1         | 15:91200007-91283004  | 82,998      | Loss     | <i>De novo</i> | <i>CHD2</i> exonic deletion. <i>CHD2 de novo</i> mutations reported recently in epileptic encephalopathy and ID; several deletions reported in individuals with ID, ASD and epilepsy                                                                                                                                                                                                                                                                                                                                                                                                                                          | HP                                                  |
| 5420_3*          | M   | Sporadic    | Whole chr 21    | 21:1-247249719        | 247,249,719 | Gain     | <i>De novo</i> | Down syndrome (47,XY+21) ( <a href="#">chromosome abnormality</a> )                                                                                                                                                                                                                                                                                                                                                                                                                                                                                                                                                           | HP                                                  |
| 14291_4120       | F   | Sporadic    | 22q13.33        | 22:49470371-49480446  | 10,076      | Loss     | <i>De novo</i> | <i>SHANK3</i> deletion of exons 9-13 (<30 kb, called with 1 algorithm only: PCNV) (sequencing coordinates: 49468716-49485255, size 16540 bp)                                                                                                                                                                                                                                                                                                                                                                                                                                                                                  | HP                                                  |
| 5241_3           | M   | Familial    | Xp21.1          | X:31793278-31822704   | 29,427      | Loss     | Maternal       | <i>DMD</i> deletion of exon 48 (predicted to lead to an in-frame deletion) (<30 kb)                                                                                                                                                                                                                                                                                                                                                                                                                                                                                                                                           | — (sex chr)                                         |
| 9861_202         | M   | Sporadic    | Xp11.4          | X:41248675-41259467   | 10,793      | Gain     | Maternal       | <i>CASK</i> partial duplication of the 5' UTR of exon 1, decreased mRNA expression in cell line (<30 kb, called with 1 algorithm only: PCNV)                                                                                                                                                                                                                                                                                                                                                                                                                                                                                  | — (sex chr)                                         |
| 5257_3*          | M   | Sporadic    | Whole chr Y     | Y:1-57772954          | 57,772,954  | Gain     | <i>De novo</i> | XYY syndrome ( <a href="#">chromosome abnormality</a> )                                                                                                                                                                                                                                                                                                                                                                                                                                                                                                                                                                       | — (sex chr)                                         |
| 5515_3*          | M   | Sporadic    | Whole chr Y     | Y:1-57772954          | 57,772,954  | Gain     | <i>De novo</i> | XYY syndrome ( <a href="#">chromosome abnormality</a> )                                                                                                                                                                                                                                                                                                                                                                                                                                                                                                                                                                       | — (sex chr)                                         |

This table includes pathogenic CNVs overlapping ASD/ID genes or loci as well as other pathogenic CNVs in cases of all ancestries. The latter included chromosome abnormalities (>7.5 Mb) that had been excluded from the main analyses, selected large rare *de novo* events, as well as experimentally validated smaller CNVs (<30 kb) or CNVs not considered stringent (called by at least one algorithm only).

With the exception of the 16p11.2 duplication found in proband 3544\_3 (note tested), all the CNVs reported in this table were experimentally validated (see details in **Table S8**).

§ For the analysis shown in **Figure 2E**, autosomal pathogenic CNVs were classified as highly penetrant (HP) or associated with variable expressivity and/or incomplete penetrance (VE/IP). CNVs on sex chromosomes or affecting novel regions were not classified for this analysis.

† Proband 16074\_1571042001 carries two pathogenic CNV: a *NRXN1* exonic deletion inherited from his mother and a 22q11.2 duplication inherited from his father.

‡ Proband 21020\_1 has a *de novo* unbalanced translocation leading to 4p duplication and 8p deletion, both considered pathogenic.

\* Three cases showed whole chromosome aneuploidies: one case with Down syndrome and two with XYY syndrome.

Abbreviations: F, female; ID, intellectual disability; M, male; UTR, untranslated region; XLID, X-linked intellectual disability

**Table S8. Phenotypes in ASD subjects with pathogenic CNVs or with selected CNVs of uncertain significance**

mmc2.xlsx (Excel workbook)

This file also contains information on CNV validation and segregation in siblings, when available.

**Table S9. Meta-analysis of loci and genes affected by rare CNVs in large ASD cohorts**

| Locus/gene                        | AGP, Stages 1+2 <sup>a</sup> |        |                           |     | SSC <sup>b</sup>     |       |                         |     | AGRE <sup>c</sup> |                |                        |               | Combined AGP + SSC + AGRE                     |     |                           |          | Combined AGP+SSC+AGRE |          | Combined AGP+SSC+AGRE |          | Del P-value† | Dup P-value† | Del Freq % | Dup Freq % |
|-----------------------------------|------------------------------|--------|---------------------------|-----|----------------------|-------|-------------------------|-----|-------------------|----------------|------------------------|---------------|-----------------------------------------------|-----|---------------------------|----------|-----------------------|----------|-----------------------|----------|--------------|--------------|------------|------------|
|                                   | Cases (1853 M, 294 F)        |        | Controls (1241 M, 1399 F) |     | Cases (968 M, 156 F) |       | Controls (403 M, 469 F) |     | Cases (n=1835)*   |                | Cases (n=837; 755 M)** |               | Cases (2821 M, 450 F + 1835* or 837; 755 M**) |     | Controls (1644 M, 1868 F) |          | Del                   |          | Dup                   |          |              |              |            |            |
|                                   | Cases                        |        | Controls                  |     | Cases                |       | Controls                |     | Cases             |                | Cases                  |               | Controls                                      |     | Cases/Controls            |          | Cases/Controls        |          |                       |          |              |              |            |            |
|                                   | Del                          | Dup    | Del                       | Dup | Del                  | Dup   | Del                     | Dup | Del               | Dup            | Del                    | Dup           | Del                                           | Dup | Del                       | Dup      | Del                   | Dup      |                       |          |              |              |            |            |
| 16p11.2                           | 5 (4)                        | 4 (2)  | -                         | 2   | 8 (7)                | 6 (4) | -                       | -   | 3 (3)*            | 2 (0) *        | 16 (14)                | 12 (6)        | -                                             | 2   | 16/5106;                  | 0/3512   | 12/5106;              | 2/3512   | 2.28E-04              | 3.52E-02 | 0.313        | 0.235        |            |            |
| 15q13.3 (BP3-BP5, BP4-BP5)#       | 4 (1)                        | -      | -                         | 1   | 2 (1)                | 1 (1) | -                       | -   | 2 (0)*            | 1 (0)*         | 8 (2)                  | 2 (1)         | -                                             | 1   | 8/5106;                   | 0/3512   | 2/5106;               | 1/3512   | 1.52E-02              | 0.637    | 0.157        | 0.039        |            |            |
| 16p13.11#                         | 3 (0)                        | 5 (0)  | -                         | 2   | 1 (0)                | 2 (1) | 1                       | 3   | 3 (0)*            | 4 (0; 1 unk)** | 7 (0)                  | 11 (1; 1 unk) | 1                                             | 5   | 7/5106;                   | 1/3512   | 11/4108;              | 5/3512   | 9.86E-02              | 0.174    | 0.137        | 0.268        |            |            |
| 15q11q13 (BP1-BP3, BP2-BP3)§      | -                            | 6 (5)  | -                         | -   | -                    | 1 (1) | -                       | -   | -                 | 6 (2)*         | -                      | 13 (8)        | -                                             | -   | 0                         | -        | 13/5106;              | 0/3512   | -                     | 1.10E-03 | -            | 0.255        |            |            |
| 22q11.2 (DiGeorge syndrome)       | 2 (2)                        | 5 (2)  | -                         | 1   | 1 (1)                | -     | -                       | -   | -                 | 3 (1)*         | 3 (3)                  | 8 (3)         | -                                             | 1   | 3/5106;                   | 0/3512   | 8/5106;               | 1/3512   | 0.208                 | 6.46E-02 | 0.059        | 0.157        |            |            |
| 17p11.2 (Smith-Magenis syndrome)  | 2 (2)                        | -      | -                         | -   | -                    | -     | -                       | -   | -                 | -              | 2 (2)                  | -             | -                                             | -   | 2/4108**;                 | 0/3512   | 0                     | -        | 0.291                 | -        | 0.049        | -            |            |            |
| 9q34.3 (Kleefstra syndrome)       | 1 (1)                        | -      | -                         | -   | 1 (1)                | -     | -                       | -   | -                 | -              | 2 (2)                  | -             | -                                             | -   | 2/4108**;                 | 0/3512   | 0                     | -        | 0.291                 | -        | 0.049        | -            |            |            |
| 1q21.1                            | 1 (1)                        | 3 (2)  | -                         | 1   | -                    | 3 (2) | -                       | -   | 1 (1)*            | 2 (0)*         | 2 (2)                  | 8 (4)         | -                                             | 1   | 2/5106;                   | 0/3512   | 8/5106;               | 1/3512   | 0.351                 | 6.46E-02 | 0.039        | 0.157        |            |            |
| 17q12                             | -                            | 1 (0)  | -                         | -   | 2 (1)                | -     | -                       | -   | -                 | -              | 2 (1)                  | 1 (0)         | -                                             | -   | 2/5106;                   | 0/3512   | 1/5106;               | 0/3512   | 0.351                 | 0.593    | 0.039        | 0.020        |            |            |
| 7q11.23 (Williams syndrome)       | 1 (1)                        | -      | -                         | -   | -                    | 4 (4) | -                       | -   | -                 | -              | 1(1)                   | 4 (4)         | -                                             | -   | 1/4108;                   | 0/3512   | 4/4108;               | 0/3512   | 0.539                 | 8.44E-02 | 0.024        | 0.097        |            |            |
| <i>PTCHD1/PTCHD1AS</i> (Xp22.11)‡ | 8 (1)                        | -      | 1                         | -   | 3 (1)                | -     | 1                       | -   | 1 (0)**           | -              | 12 (2)                 | -             | 2                                             | -   | 12/3576**;                | 2/1644 M | 0                     | -        | 0.133                 | -        | 0.336        | -            |            |            |
| <i>NRXN1</i> (2p16.3)             | 6 (4)                        | 1 (1)§ | 1                         | -   | 3 (1)                | -     | 1                       | -   | 4 (0)**           | -              | 13 (5)                 | 1 (1)         | 2                                             | -   | 13/4108**;                | 2/3512   | 1/4108;               | 0/3512   | 8.50E-03              | 0.539    | 0.316        | 0.024        |            |            |
| <i>SHANK3</i> (22q13.33)&         | 4 (4)                        | -      | -                         | -   | -                    | -     | -                       | -   | -                 | -              | 4 (4)                  | -             | -                                             | -   | 4/4108**;                 | 0/3512   | 0                     | -        | 8.44E-02              | -        | 0.097        | -            |            |            |
| <i>SHANK2</i> (11q13.3)           | 3 (3)                        | -      | -                         | -   | -                    | -     | -                       | -   | -                 | 1 (0)**        | 3 (3)                  | 1 (0)         | -                                             | -   | 3/4108**;                 | 0/3512   | 1/4108;               | 0/3512   | 0.157                 | 0.539    | 0.073        | 0.024        |            |            |
| <i>NLGN3</i> (Xq13.1) ‡           | -                            | -      | -                         | -   | 1 (0)                | -     | -                       | -   | -                 | -              | 1 (0)                  | -             | -                                             | -   | 1/3576**;                 | 0/1644 M | 0                     | -        | 0.685                 | -        | 0.028        | -            |            |            |
| <i>NLGN4X</i> (Xp22.3) ‡          | -                            | -      | -                         | -   | -                    | 1 (0) | -                       | -   | -                 | 1 (1 unk)**    | -                      | 2 (1 unk)     | -                                             | -   | 0                         | -        | 2/3576;               | 0/1644 M | -                     | 0.469    | -            | 0.056        |            |            |

CNVs are ordered according to frequency. Numbers in parentheses indicate *de novo* events. For *NRXN1*, *SHANK2*, *SHANK3*, *NLGN3* and *NLGN4X* CNVs are only counted in cases and controls if they affect one or more exons; chromosome X events are only counted for males.

\*Number of AGRE cases in Moreno-de-Luca et al.<sup>111</sup> (n=1835 cases). A few of the regions in this table were not listed in Moreno-de-Luca et al.'s paper; we obtained the counts of subjects with deletions/duplications in these additional regions directly from the authors - the total number of inspected cases after quality control for the additional regions was 837 unrelated probands from 1105 families (or a total of 1472 all affected): 161 families with multiple males and females affected children, 594 families with only one male affected child and 82 families with only one female affected child. The total number of AGRE families with at least one male affected child was 161+594=755, and the total number of AGRE families with at least one female affected child was 161+82=243. The combined number of cases used to get estimates for this table was: i) 5106 = (AGP+SSC) + AGRE= 3271+1835 or ii) 4108 (\*\*)= 3271+837.

† Fisher exact test, one-sided P-value

# Duplications of the 15q13.3 and 16p13.11 regions are of uncertain clinical significance, because they have not been found to be consistently enriched in cases compared to controls.

§ Of the 13 duplications of the 15q11q13 region, 5 were maternally inherited (1 AGP, 4 AGRE), and 8 were *de novo*. Of the 8 *de novo* duplications, 5 were of maternal origin (4 AGP, 1 SSC), two were of paternal origin (AGP: 8630\_201 and AGRE: AU1135202), and one without information (1 AGRE: AU1042303).

§ *NRXN1* intragenic duplication, predicted to result in a premature truncated protein.

‡ Only males counted. The combined number of males used to get estimates for this table was 3576 = (AGP+SSC) + AGRE= 2821+755

+ The two *de novo* deletions in this locus were found in male probands from an SSC family (12561) and AGP family (subject 5240\_4)

& Includes *SHANK3* gene exonic deletions as well as 22q13 deletion syndrome (Phelan-McDermid syndrome).

Abbreviations: AGP, Autism Genome Project; AGRE, Autism Genetic Resource Exchange; BP, breakpoint; Del, deletion; Dup, duplication; F, female; Freq, frequency; M, male; SSC, Simons Simplex Collection; unk, unknown.

<sup>a</sup> Ref<sup>117</sup> + Stage 2 (this study) (only subjects of European ancestry included)

<sup>b</sup> Ref<sup>132</sup>

<sup>c</sup> Ref<sup>111</sup>



**Table S10. FMRP targets affected by deletions in probands and not yet implicated in ASD or ID**

| FMRP targets not yet implicated in ASD or ID |                 |
|----------------------------------------------|-----------------|
| <i>ABR</i>                                   | <i>MAPK8IP3</i> |
| <i>AGTPBP1</i>                               | <i>MBP</i>      |
| <i>ARHGAP32</i>                              | <i>NBEA</i>     |
| <i>BAI1</i>                                  | <i>NRXN3</i>    |
| <i>BRSK1</i>                                 | <i>PCDH9</i>    |
| <i>CAMSAP1</i>                               | <i>PLCB1</i>    |
| <i>DTNA</i>                                  | <i>PLEC</i>     |
| <i>EML2</i>                                  | <i>PRKACB</i>   |
| <i>EP400</i>                                 | <i>PTPRD</i>    |
| <i>FAM115A</i>                               | <i>PTPRT</i>    |
| <i>FAM21A</i>                                | <i>R3HDM1</i>   |
| <i>FAM91A1</i>                               | <i>RALGAPA1</i> |
| <i>FAT4</i>                                  | <i>RALGDS</i>   |
| <i>GRM5</i>                                  | <i>RPRD2</i>    |
| <i>KCNH1</i>                                 | <i>SHANK1</i>   |
| <i>KIAA0430</i>                              | <i>SPTB</i>     |
| <i>KIAA0913</i>                              | <i>TCF25</i>    |
| <i>LLGL1</i>                                 | <i>TRIP12</i>   |
| <i>LPHN3</i>                                 | <i>TRPM3</i>    |
| <i>LPPR4</i>                                 | <i>ULK2</i>     |
| <i>LYNX1</i>                                 | <i>UNC13C</i>   |
| <i>MADD</i>                                  |                 |

Of the FMRP targets<sup>9</sup> (n=842, one without correspondence in our annotation file) affected by exonic deletions in ASD subjects, 58 genes correspond to known ASD/ID genes (**Tables S6A-S6D**). This table lists the remaining 43 FMRP targets not yet implicated in ASD or ID, considered ASD candidate genes.

## Tables S11A-S11E. Multigene analyses – various models

**Table S11A. Primary analysis**

|                                                                                                                                      | Estimate  | Std. Error | z value | Pr(> z )    |
|--------------------------------------------------------------------------------------------------------------------------------------|-----------|------------|---------|-------------|
| <b>Model treating CNVs within the same individual as independent (pseudo R<sup>2</sup> 0.007)</b>                                    |           |            |         |             |
| (Intercept)                                                                                                                          | -0.195271 | 0.027722   | -7.044  | 1.87e-12*** |
| factor(CNV)Dup                                                                                                                       | -0.120601 | 0.039779   | -3.032  | 0.00243**   |
| ngene                                                                                                                                | 0.030912  | 0.005768   | 5.359   | 8.37e-08*** |
| RPKM                                                                                                                                 | 0.057893  | 0.024207   | 2.392   | 0.01677*    |
| <b>Model treating CNVs within the same individual as independent, and analyzing deletions only (pseudo R<sup>2</sup> 0.007)</b>      |           |            |         |             |
| (Intercept)                                                                                                                          | -0.21920  | 0.02979    | -7.359  | 1.85e-13*** |
| ngene                                                                                                                                | 0.02857   | 0.01030    | 2.773   | 0.005549**  |
| RPKM                                                                                                                                 | 0.14595   | 0.04153    | 3.515   | 0.000441*** |
| <b>Model treating CNVs within the same individual as independent, and analyzing duplications only (pseudo R<sup>2</sup> 0.008)</b>   |           |            |         |             |
| (Intercept)                                                                                                                          | -0.282964 | 0.036126   | -7.833  | 4.78e-15*** |
| ngene                                                                                                                                | 0.031361  | 0.006981   | 4.492   | 7.04e-06*** |
| RPKM                                                                                                                                 | 0.011110  | 0.029966   | 0.371   | 0.711       |
| <b>Model with the number of genes and the average RPKM nested within deletion or duplication status (pseudo R<sup>2</sup> 0.008)</b> |           |            |         |             |
| (Intercept)                                                                                                                          | -0.219196 | 0.029785   | -7.359  | 1.85e-13*** |
| factor(CNV)Dup                                                                                                                       | -0.063768 | 0.046821   | -1.362  | 0.173217    |
| factor(CNV)Del:ngene                                                                                                                 | 0.028566  | 0.010301   | 2.773   | 0.005549**  |
| factor(CNV)Dup:ngene                                                                                                                 | 0.031361  | 0.006981   | 4.492   | 7.04e-06*** |
| factor(CNV)Del:RPKM                                                                                                                  | 0.145950  | 0.041528   | 3.515   | 0.000441*** |
| factor(CNV)Dup:RPKM                                                                                                                  | 0.011110  | 0.029966   | 0.371   | 0.710813    |

Abbreviations: ngene, number of genes; RPKM, reads per kb per million reads

In our primary analysis we treated CNVs falling within the same individual as independent (main **Figures 3C-D** and **Table S11A**). **Figures 3C-D** show the pattern of increased burden with the increased number of brain-expressed genes affected (1-hit, 2-hit, 3-hit, 4- to 10-hit) by deletions or duplications. The percentage of cases and controls with CNVs overlapping genes is shown for deletions and duplications separately. To account for the fact that some individuals carry a multiplicity of rare CNVs, we also performed analyses counting all genes in all rare CNVs per individual, as well as the brain expression of those genes, and entered those in the model (**Table S11B**); and we evaluated the impact of the largest CNV and its gene expression. Results from these alternative models were similar, showing that the dependence due to CNVs occurring in the same individual has only a minor impact on inference. For each model, Nagelkerke's pseudo-R<sup>2</sup> was calculated to provide a description of how well the model fitted the data.

In **Figure 3C-D** (main text), the expected odds ratios (depicted by stars) were estimated by fitting a logit model of the case status (case/control) with CNV type and three covariates, the deletion/duplication status, the number of genes covered by each CNV and their average brain expression value for the genes covered by the CNV. Gene level expression values for the neocortex were obtained from the BrainSpan RNA sequencing resource, transformed to  $\log(1+RPKM)$ , and the average of the transformed RPKM value for the genes covered by the CNV was used in the model (i.e. total RPKM of all genes covered by the CNV divided by the total number of genes within the CNV). Differences between the effect of the number of genes and expression values between deletion and duplication CNVs were further evaluated by analyzing each subset of the data separately.

In **Table S11A**, we fit a logit model with the following covariates: deletion/duplication status of the CNV, the number of genes covered by each CNV and the average of the transformed RPKM value (i.e. RPKM value transformed to  $\log(1+RPKM)$ ) for the genes covered by the CNV (total RPKM of all genes covered by the CNV divided by the total number of genes). We ignored the fact that individuals could have multiple CNVs. All effects in the model are significant. There is higher risk for autism when the number of genes covered by the CNV is larger and when the average (transformed) RPKM value is higher. Also notice that the risk for autism is slightly lower for duplications as opposed to deletions.

We also checked whether there were differences between the effect of the number of genes and RPKM between deletions and duplications by analyzing each subset of the data separately. Notice that the increased risk due to the number of covered genes for autism is fairly similar for duplications and deletions, while the increased risk due to an increase of the average RPKM is significant for deletions but not for duplications.

Another way to assess the differences between duplications and deletions would be to fit the effect of the number of genes and the average RPKM nested within deletion and duplication CNV status. The results are virtually the same for this model as the previous split data analysis.

**Table S11B. Models accounting for the fact that some individuals carry a multiplicity of rare CNVs**

|                                                                                                                                                                                                                                                               | Estimate  | Std. Error | z value | Pr(> z )    |
|---------------------------------------------------------------------------------------------------------------------------------------------------------------------------------------------------------------------------------------------------------------|-----------|------------|---------|-------------|
| <b>Model considering the total number of genes covered by all deletions or duplications in an individual (ngeneDel, ngeneDup) and the average RPKM value for the genes in deleted or duplicated regions (mRPKMDel, mRPKMDup) (pseudo R<sup>2</sup> 0.016)</b> |           |            |         |             |
| (Intercept)                                                                                                                                                                                                                                                   | -0.37032  | 0.04326    | -8.560  | <2e-16***   |
| ngeneDel                                                                                                                                                                                                                                                      | 0.03292   | 0.01006    | 3.273   | 0.001066**  |
| ngeneDup                                                                                                                                                                                                                                                      | 0.03506   | 0.01010    | 3.471   | 0.000519*** |
| mRPKMDel                                                                                                                                                                                                                                                      | 0.17159   | 0.05014    | 3.422   | 0.000621*** |
| mRPKMDup                                                                                                                                                                                                                                                      | 0.01307   | 0.03796    | 0.344   | 0.730597    |
| <b>Model when selecting CNVs within individuals based on the maximum number of genes covered by the CNVs (pseudo R<sup>2</sup> 0.018)</b>                                                                                                                     |           |            |         |             |
| (Intercept)                                                                                                                                                                                                                                                   | -0.365583 | 0.042510   | -8.600  | <2e-16***   |
| maxGeneDel                                                                                                                                                                                                                                                    | 0.035244  | 0.010939   | 3.222   | 0.001273**  |
| maxGeneDup                                                                                                                                                                                                                                                    | 0.027772  | 0.006957   | 3.992   | 6.55e-05*** |
| RPKMDel                                                                                                                                                                                                                                                       | 0.171068  | 0.048600   | 3.520   | 0.000432*** |
| RPKMDup                                                                                                                                                                                                                                                       | -0.000702 | 0.036458   | -0.019  | 0.984637    |
| <b>Model when selecting the CNVs based on the maximum average standardized RPKM (pseudo R<sup>2</sup> 0.015)</b>                                                                                                                                              |           |            |         |             |
| (Intercept)                                                                                                                                                                                                                                                   | -0.36725  | 0.04326    | -8.490  | <2e-16***   |
| nGeneDel                                                                                                                                                                                                                                                      | 0.03289   | 0.01173    | 2.805   | 0.00503**   |
| nGeneDup                                                                                                                                                                                                                                                      | 0.02543   | 0.00795    | 3.199   | 0.00138**   |
| maxRPKMDel                                                                                                                                                                                                                                                    | 0.17640   | 0.04392    | 4.016   | 5.91e-05*** |
| maxRPKMDup                                                                                                                                                                                                                                                    | 0.01741   | 0.03205    | 0.543   | 0.58705     |

Abbreviations: ngene, number of genes; RPKM, reads per kb per million reads

To take into account the effect of multiple CNVs per individual we decided to re-analyze the data using a model in which we fit the total number of genes covered by all deletions in an individual (ngeneDel), the total number of genes covered by duplications in an individual (ngeneDup) as well as the average RPKM value for these genes in a deletion region (mRPKMDel) and the average RPKM for those in a duplication region (mRPKMDup) (**upper panel**). All effects, except the one for the average RPKM of genes covered by duplications (mRPKMDup) were significant. Notice the similarity of the results of this model with the one in which we analyzed the duplications and deletions separately. In both analyses the risk due to the number of genes is similar in duplications and deletions. However, only higher mean RPKM values for deletions increase risk for ASD.

Instead of looking at the average number of genes and average RPKM covered by deletions and duplications, one can also identify the CNVs for which the maximum value is obtained. This table shows the results of the generalized linear model when CNVs are selected within individuals based on the maximum number of genes covered by the CNVs (**middle panel**), as well as the results obtained when selecting the CNVs based on the maximum average standardized RPKM (**lower panel**). Notice the great similarity between these two analyses as well as the analysis in which we took the average of multiple CNVs per individual. In all three cases the effect of the number of genes covered by the CNVs is significant and the magnitude of the risk is very similar. Also, for all three analyses, the value of the average RPKM is only significant for deletions.

**Table S11C. Removing cases with validated *de novo* CNVs**

|                                                                                                                                                                  | Estimate  | Std. Error | z value | Pr(> z )    |
|------------------------------------------------------------------------------------------------------------------------------------------------------------------|-----------|------------|---------|-------------|
| <b>Model considering the average number of genes and the average RPKM of genes covered by the CNVs in the remaining individuals (pseudo R<sup>2</sup> 0.005)</b> |           |            |         |             |
| (Intercept)                                                                                                                                                      | -0.343950 | 0.043740   | -7.863  | 3.74e-15*** |
| ngeneDel                                                                                                                                                         | 0.010159  | 0.011975   | 0.848   | 0.39625     |
| ngeneDup                                                                                                                                                         | 0.024238  | 0.010586   | 2.290   | 0.02204*    |
| mRPKMDel                                                                                                                                                         | 0.137438  | 0.051433   | 2.672   | 0.00754**   |
| mRPKMDup                                                                                                                                                         | 0.006056  | 0.038418   | 0.158   | 0.87474     |
| <b>Model considering the CNVs with the maximum number of genes covered, in the remaining individuals (pseudo R<sup>2</sup> 0.006)</b>                            |           |            |         |             |
| (Intercept)                                                                                                                                                      | -0.343072 | 0.043122   | -7.956  | 1.78e-15*** |
| maxGeneDel                                                                                                                                                       | 0.010173  | 0.013176   | 0.772   | 0.44005     |
| maxGeneDup                                                                                                                                                       | 0.020914  | 0.007687   | 2.721   | 0.00651**   |
| RPKMDel                                                                                                                                                          | 0.139397  | 0.049723   | 2.803   | 0.00506**   |
| RPKMDup                                                                                                                                                          | -0.004947 | 0.036953   | -0.134  | 0.89351     |
| <b>Model considering the CNVs with the maximum RPKM, in the remaining individuals (pseudo R<sup>2</sup> 0.006)</b>                                               |           |            |         |             |
| (Intercept)                                                                                                                                                      | -0.342025 | 0.043733   | -7.821  | 5.25e-15*** |
| nGeneDel                                                                                                                                                         | 0.009579  | 0.014296   | 0.670   | 0.50285     |
| nGeneDup                                                                                                                                                         | 0.020248  | 0.008438   | 2.399   | 0.01642*    |
| maxRPKMDel                                                                                                                                                       | 0.131945  | 0.045620   | 2.892   | 0.00382**   |
| maxRPKMDup                                                                                                                                                       | 0.001850  | 0.032626   | 0.057   | 0.95477     |

Abbreviations: ngene, number of genes; RPKM, reads per kb per million reads

To assess the impact of validated *de novo* CNVs we removed 77 cases that had at least one validated *de novo* CNV. (Note that the total dataset contained 90 validated *de novo* CNVs in 87 cases of European ancestry; of these, 85 *de novo* CNVs in 82 unique European cases had sizes  $\geq 30$  kb; individuals with chromosomal abnormalities were excluded from the main analyses). Because of the nature of the control data, *de novo* CNV status was not available in the controls.

Results for the analysis of the average number of genes and the average RPKM of genes covered by the CNVs in the remaining individuals showed that the average number of genes covered by deletions is no longer significant (**upper panel**). In this analysis, only the average number of genes covered by duplications and the average RPKM of genes covered by deletions are significant. A similar pattern of results is found when analyzing the CNVs with the maximum number of genes covered (**middle panel**), and the CNVs selected based on the maximum RPKM (**lower panel**). The results in this table show that removing only 77 out of 1,914 cases, or 4% of the case sample, results in a large decrease in signal, suggesting that most of the risk traces to *de novo* CNVs.

**Table S11D. Removing subjects with CNVs considered pathogenic**

|                                                                                                                                                                  | Estimate  | Std. Error | z value | Pr(> z )    |
|------------------------------------------------------------------------------------------------------------------------------------------------------------------|-----------|------------|---------|-------------|
| <b>Model considering the average number of genes and the average RPKM of genes covered by the CNVs in the remaining individuals (pseudo R<sup>2</sup> 0.004)</b> |           |            |         |             |
| (Intercept)                                                                                                                                                      | -0.329996 | 0.043973   | -7.505  | 6.17e-14*** |
| nGeneDel                                                                                                                                                         | 0.006021  | 0.012452   | 0.484   | 0.62871     |
| nGeneDup                                                                                                                                                         | 0.015398  | 0.011366   | 1.355   | 0.17551     |
| mRPKMDel                                                                                                                                                         | 0.159530  | 0.051078   | 3.123   | 0.00179**   |
| mRPKMDup                                                                                                                                                         | 0.013352  | 0.038353   | 0.348   | 0.72774     |
| <b>Model considering the CNVs with the maximum number of genes covered, in the remaining individuals (pseudo R<sup>2</sup> 0.005)</b>                            |           |            |         |             |
| (Intercept)                                                                                                                                                      | -0.326948 | 0.043399   | -7.533  | 4.94e-14*** |
| maxGeneDel                                                                                                                                                       | 0.003602  | 0.013877   | 0.260   | 0.795200    |
| maxGeneDup                                                                                                                                                       | 0.015129  | 0.008447   | 1.791   | 0.073290 .  |
| RPKMDel                                                                                                                                                          | 0.164659  | 0.049298   | 3.340   | 0.000838*** |
| RPKMDup                                                                                                                                                          | -0.001081 | 0.037003   | -0.029  | 0.976694    |
| <b>Model considering the CNVs with the maximum RPKM, in the remaining individuals (pseudo R<sup>2</sup> 0.005)</b>                                               |           |            |         |             |
| (Intercept)                                                                                                                                                      | -0.330966 | 0.044004   | -7.521  | 5.43e-14*** |
| nGeneDel                                                                                                                                                         | 0.004337  | 0.014825   | 0.293   | 0.769840    |
| nGeneDup                                                                                                                                                         | 0.011546  | 0.009555   | 1.208   | 0.226890    |
| maxRPKMDel                                                                                                                                                       | 0.156664  | 0.045120   | 3.472   | 0.000516*** |
| maxRPKMDup                                                                                                                                                       | 0.011904  | 0.032612   | 0.365   | 0.715084    |

Abbreviations: nGene, number of genes; RPKM, reads per kb per million reads

The AGP list of CNVs was curated to identify a subset that could be considered pathogenic (**Table S7B**). These CNVs were carried by 82 unique individuals, and of these 69 were of European ancestry and thus included in these analyses (missing individuals include other ancestries as well as individuals with chromosomal abnormalities [**Table S1C**], excluded from the main analyses).

After removing the individuals with pathogenic CNVs we reran the same three analyses as before. In general, these analyses show good agreement with the results from the comparable models obtained by removing the validated *de novo* CNVs only. This is not surprising because the two sets of events overlap fairly substantially. Here again it is shown that the value of RPKM for deletion CNVs is the most important irrespective of CNV status (i.e., even after removing both *de novo* and inherited pathogenic CNVs), significant in all three analyses. The magnitude of the risk associated with the deletion RPKMs is again very consistent to what was found in the previous analysis. Altogether these results are consistent with a genetic interaction model where imbalance of multiple genes intersected by rare *de novo* and inherited pathogenic CNVs contributes to risk. Furthermore, our findings are also in line with a previous report suggesting that deletions have larger effects on transcriptional level and contained more genes with altered expression compared to duplications.<sup>140</sup>

**Table S11E. Model including sex**

|                                                                                                                   | Estimate  | Std. Error | z value | Pr(> z )    |
|-------------------------------------------------------------------------------------------------------------------|-----------|------------|---------|-------------|
| <b>Males (pseudo R<sup>2</sup> 0.011)</b>                                                                         |           |            |         |             |
| (Intercept)                                                                                                       | 0.23934   | 0.05445    | 4.396   | 1.1e-05***  |
| nGeneDel                                                                                                          | 0.03734   | 0.01417    | 2.635   | 0.00842**   |
| nGeneDup                                                                                                          | 0.03118   | 0.01300    | 2.398   | 0.01649*    |
| maxRPKMDel                                                                                                        | 0.12490   | 0.06376    | 1.959   | 0.05010 .   |
| maxRPKMDup                                                                                                        | 0.03293   | 0.04898    | 0.672   | 0.50133     |
| <b>Females (pseudo R<sup>2</sup> 0.010)</b>                                                                       |           |            |         |             |
| (Intercept)                                                                                                       | -1.69525  | 0.09428    | -17.980 | <2e-16***   |
| nGeneDel                                                                                                          | 0.04850   | 0.01853    | 2.617   | 0.00886**   |
| nGeneDup                                                                                                          | 0.02393   | 0.01777    | 1.347   | 0.17803     |
| maxRPKMDel                                                                                                        | 0.18177   | 0.10508    | 1.730   | 0.08366 .   |
| maxRPKMDup                                                                                                        | 0.01009   | 0.07995    | 0.126   | 0.89953     |
| <b>Model selecting the CNV covering the largest number of genes in males (pseudo R<sup>2</sup> 0.013)</b>         |           |            |         |             |
| (Intercept)                                                                                                       | 0.237196  | 0.053568   | 4.428   | 9.51e-06*** |
| maxGeneDel                                                                                                        | 0.033687  | 0.014671   | 2.296   | 0.02167*    |
| maxGeneDup                                                                                                        | 0.027932  | 0.009389   | 2.975   | 0.00293**   |
| RPKMDel                                                                                                           | 0.132569  | 0.061994   | 2.138   | 0.03248*    |
| RPKMDup                                                                                                           | 0.027329  | 0.047174   | 0.579   | 0.56238     |
| <b>Model selecting the CNV covering the largest number of genes in females (pseudo R<sup>2</sup> 0.012)</b>       |           |            |         |             |
| (Intercept)                                                                                                       | -1.68903  | 0.09260    | -18.240 | <2e-16***   |
| maxGeneDel                                                                                                        | 0.05820   | 0.02053    | 2.835   | 0.00458**   |
| maxGeneDup                                                                                                        | 0.01797   | 0.01216    | 1.477   | 0.13955     |
| RPKMDel                                                                                                           | 0.19642   | 0.10003    | 1.964   | 0.04957*    |
| RPKMDup                                                                                                           | -0.01833  | 0.07737    | -0.237  | 0.81267     |
| <b>Model selecting the CNV with the largest average standardized RPKM in males (pseudo R<sup>2</sup> 0.011)</b>   |           |            |         |             |
| (Intercept)                                                                                                       | 0.23799   | 0.05448    | 4.369   | 1.25e-05*** |
| maxGeneDel                                                                                                        | 0.02668   | 0.01536    | 1.737   | 0.08239 .   |
| maxGeneDup                                                                                                        | 0.02680   | 0.01086    | 2.467   | 0.01361*    |
| maxRPKMDel                                                                                                        | 0.16081   | 0.05596    | 2.874   | 0.00406**   |
| maxRPKMDup                                                                                                        | 0.03207   | 0.04131    | 0.776   | 0.43749     |
| <b>Model selecting the CNV with the largest average standardized RPKM in females (pseudo R<sup>2</sup> 0.011)</b> |           |            |         |             |
| (Intercept)                                                                                                       | -1.684587 | 0.094701   | -17.788 | <2e-16***   |
| maxGeneDel                                                                                                        | 0.065273  | 0.021786   | 2.996   | 0.00273**   |
| maxGeneDup                                                                                                        | 0.008598  | 0.017921   | 0.480   | 0.63137     |
| maxRPKMDel                                                                                                        | 0.147739  | 0.094098   | 1.570   | 0.11640     |
| maxRPKMDup                                                                                                        | 0.019179  | 0.068047   | 0.282   | 0.77806     |

Abbreviations: ngene, number of genes; RPKM, reads per kb per million reads

We ran the same three models, except this time the data were separated by sex: 1,641 cases and 1,102 controls were male, while 273 cases and 1,257 controls were female. There is general agreement in the parameter estimates between males and females for all three sets of analyses. We also ran tests for significant differences in predictors when they interacted with sex, but none of these interactions were significant (data not shown).

## Tables S12A-S12D. GO terms, pathways, and MPO enrichment in affecteds versus control subjects

mmc3.xlsx (Excel workbook)

## Table S13A. Gene Ontology terms and pathways used to generate a list of neurodevelopmental functions

| Gs ID      | Gs Name                                      |
|------------|----------------------------------------------|
| GO:0007399 | Nervous system development                   |
| GO:0050877 | Neurological system process                  |
| GO:0043025 | Neuronal cell body                           |
| GO:0043005 | Neuron projection                            |
| KEGG:04725 | Cholinergic synapse                          |
| KEGG:04724 | Glutamatergic synapse                        |
| KEGG:04728 | Dopaminergic synapse                         |
| KEGG:04727 | GABAergic synapse                            |
| KEGG:04726 | Serotonergic synapse                         |
| KEGG:04721 | Synaptic vesicle cycle                       |
| KEGG:04723 | Retrograde endocannabinoid signaling         |
| KEGG:05030 | Cocaine addiction                            |
| KEGG:05031 | Amphetamine addiction                        |
| KEGG:05032 | Morphine addiction                           |
| KEGG:05033 | Nicotine addiction                           |
| KEGG:04722 | Neurotrophin signaling pathway               |
| REACT:708  | REACT: Neuronal system                       |
| REACT:675  | REACT: NCAM signaling for neurite out-growth |
| REACT:138  | REACT: Axon guidance                         |
| NCI:142    | NCI: netrin pathway                          |
| NCI:180    | NCI: reelin pathway                          |
| KEGG:04360 | Axon guidance                                |
| KEGG:04720 | Long-term potentiation                       |
| KEGG:04730 | Long-term depression                         |

**Table S13B. Effect size for neurobiological-related clusters**

**B1. FDR 15%**

| Logistic regression-FDR 15% <sup>a</sup> | Combined (% all subjects) | Stage 1    | Stage 2    |
|------------------------------------------|---------------------------|------------|------------|
| Cases                                    | 89 (4.70%)                | 57 (4.65%) | 32 (4.79%) |
| Controls                                 | 35 (1.49%)                | 17 (1.37%) | 18 (1.63%) |
| OR                                       | 3.15                      | 3.39       | 2.94       |
| Cases (max 10 genes/CNV)                 | 56 (2.96%)                | 37 (3.02%) | 19 (2.84%) |
| Controls (max 10 genes/CNV)              | 31 (1.32%)                | 14 (1.13%) | 17 (1.54%) |
| OR (max 10 genes/CNV)                    | 2.24                      | 2.67       | 1.85       |

<sup>a</sup>REACT: Neuronal system; REACT: Transmission across chemical synapses; KEGG: Glutamatergic synapse; KEGG: Cholinergic synapse; GO: Generation of neurons; GO: Neuron projection morphogenesis; GO: Neuron differentiation; GO: Neuron development; GO: Cell morphogenesis involved in neuron differentiation; GO: Axonogenesis; GO: Neuron projection development; GO: Axon guidance.

FDR, false-discovery rate; OR, odds ratio; max-10 genes-CNVs, estimates considering CNVs with maximum 10 genes.

**B2. FDR 20%**

| Logistic regression-FDR 20% <sup>a</sup> | Combined (% all subjects) | Stage 1    | Stage 2    |
|------------------------------------------|---------------------------|------------|------------|
| Cases                                    | 99 (5.23%)                | 64 (5.23%) | 35 (5.24%) |
| Controls                                 | 49 (2.09%)                | 26 (2.10%) | 23 (2.08%) |
| OR                                       | 2.50                      | 3.39       | 2.51       |
| Cases (max 10 genes/CNV)                 | 66 (3.49%)                | 44 (3.59%) | 22 (3.29%) |
| Controls (max 10 genes/CNV)              | 45 (1.92%)                | 23 (1.86%) | 22 (1.99%) |
| OR (max 10 genes/CNV)                    | 1.82                      | 1.93       | 1.65       |

<sup>a</sup>REACT: Neuronal system; REACT: Transmission across chemical synapses; KEGG: Glutamatergic synapse; KEGG: Cholinergic synapse; GO: Generation of neurons; GO: Neuron projection morphogenesis; GO: Neuron differentiation; GO: Neuron development; GO: Cell morphogenesis involved in neuron differentiation; GO: Axonogenesis; GO: Neuron projection development; GO: Axon guidance; REACT: Neurotransmitter receptor binding and downstream transmission in the postsynaptic cell; KEGG: Retrograde endocannabinoid signaling; REACT: Axon guidance; KEGG: Dopaminergic synapse; KEGG: Neurotrophin signaling pathway; GO: Learning or memory.

FDR, false-discovery rate; OR, odds ratio; max-10 genes-CNVs, estimates considering CNVs with maximum 10 genes.



**Table S13C. Neuronal synapse main cluster**

**C1. Statistics for all subjects with exonic CNVs (deletions and duplications) at FDR 15%**

|             | Subject N<br>(% all subjects) | Stage 1    | Stage 2    |
|-------------|-------------------------------|------------|------------|
| Cases       | 36 (1.96%)                    | 20 (1.63%) | 16 (2.40%) |
| Controls    | 9 (0.38%)                     | 5 (0.40%)  | 4 (0.36%)  |
| OR [95% CI] | <b>4.93 [2.31-11.72]</b>      | 4.04       | 6.62       |

36 cases (25 supporting genes) vs. 9 controls (9 supporting genes). Stage 2 is more enriched, but Stage 1 also displays a respectable signal.

FDR, false-discovery rate; CI, confidence interval; OR: odds ratio

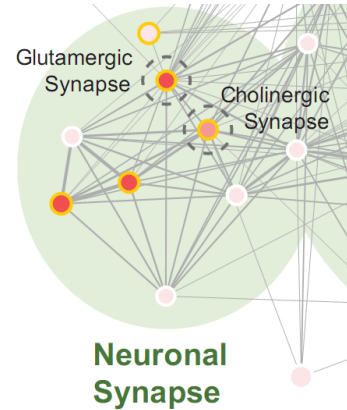

**C2. Detailed statistics for pathways included within the Neuronal synapse cluster at FDR 15%**

|                             | All Cases  | All Controls | Stage 1 Cases | Stage 1 Controls | Stage 2 Cases | Stage 2 Controls |
|-----------------------------|------------|--------------|---------------|------------------|---------------|------------------|
| KEGG Glutamatergic          | 19 (1.00%) | 2 (0.09%)    | 10 (0.82%)    | 1 (0.08%)        | 9 (1.35%)     | 1 (0.09%)        |
| KEGG Cholinergic            | 17 (0.90%) | 2 (0.09%)    | 9 (0.74%)     | 2 (0.16%)        | 8 (1.20%)     | 0 (0.00%)        |
| REACT Neuronal System       | 26 (1.37%) | 6 (0.26%)    | 14 (1.14%)    | 3 (0.24%)        | 12 (1.80%)    | 3 (0.27%)        |
| REACT Synaptic Transmission | 21 (1.11%) | 3 (0.13%)    | 11 (0.90%)    | 2 (0.16%)        | 10 (1.50%)    | 1 (0.09%)        |

Statistics for all subjects with exonic CNVs (deletions and duplications included). Calculation of % of subjects is based on subjects with at least one genic exonic loss; for max-10 this is limited to subjects with a maximum of 10 deleted genes.

**Table S13D. Genes and subjects represented in the enriched cholinergic and glutamergic synapse subclusters**

**D1. Genes**

|                                                                     | Cholinergic             |                        | Both            |                        | Glutamergic     |                        |
|---------------------------------------------------------------------|-------------------------|------------------------|-----------------|------------------------|-----------------|------------------------|
|                                                                     | Gene name               | # cases;<br># controls | Gene name       | # cases;<br># controls | Gene name       | # cases;<br># controls |
| Neurotransmitters (receptors and metabolism)                        | <i>CHAT*</i>            | 2; 0 (2*)              | –               | –                      | <i>GRIK2</i>    | 1; 0                   |
|                                                                     | <i>CHRNA7</i>           | 4; 0                   | –               | –                      | <i>GRM5</i>     | 1; 0                   |
|                                                                     | <i>KCNJ12</i>           | 1; 0                   | –               | –                      | –               | –                      |
|                                                                     | <i>SLC18A3 (VACHT)*</i> | 2; 0 (2*)              | –               | –                      | –               | –                      |
| Scaffolds (synaptic organizers)                                     | –                       | –                      | –               | –                      | <i>SHANK1</i>   | 1; 0                   |
|                                                                     | –                       | –                      | –               | –                      | <i>SHANK2</i>   | 3; 0                   |
|                                                                     | –                       | –                      | –               | –                      | <i>SHANK3</i>   | 3; 0                   |
| Signalling (downstream neurotransmitter receptors and ion channels) | <i>CAMK2G**</i>         | 1; 0 (1**)             | <i>GNG2***</i>  | 2; 0 (1***)            | <i>PPP3CB**</i> | 1; 0 (1**)             |
|                                                                     | –                       | –                      | <i>GNG13</i>    | 1; 0                   | –               | –                      |
|                                                                     | –                       | –                      | <i>MAPK3***</i> | 5; 0 (1***)            | –               | –                      |
|                                                                     | –                       | –                      | <i>PRKACB</i>   | 1; 0                   | –               | –                      |
|                                                                     | –                       | –                      | <i>PLCB1</i>    | 1; 0                   | –               | –                      |

26 cases (16 supporting genes) vs. 3 controls (3 genes). Numbers between parentheses represent the number of *de novo* events.

\*\* Two genes within the same event/same sample (multigene); \*\*\* two genes in two different events in same sample (double-CNV-hit).

**D2. ASD subjects**

| Sample ID        | Gene(s) in CNV                    | CNV inheritance              | Biological function                                                 | Functional sub-cluster   |
|------------------|-----------------------------------|------------------------------|---------------------------------------------------------------------|--------------------------|
| 8534_201         | <i>CHAT*</i> ; <i>SLC18A3*</i>    | dn (5.9 Mb del)              | Neurotransmitters (receptors and metabolism)                        | Cholinergic              |
| 4312_1           | <i>CHAT*</i> ; <i>SLC18A3*</i>    | pat (5.9 Mb del)             |                                                                     | Cholinergic              |
| 8465_202         | <i>GRIK2</i>                      | pat (39 kb del)              |                                                                     | Glutamergic              |
| 8549_201         | <i>GRM5</i>                       | pat (1.98 Mb del)            |                                                                     | Glutamergic              |
| 3567_4           | <i>KCNJ12</i>                     | pat (324 kb del)             |                                                                     | Cholinergic              |
| 18100_302        | <i>CHRNA7</i>                     | pat (1.6 Mb del)             |                                                                     | Cholinergic              |
| 1950_301         | <i>CHRNA7</i>                     | mat (1.7 Mb del)             |                                                                     | Cholinergic              |
| 14167_2720       | <i>CHRNA7</i>                     | pat (1.7 Mb del)             |                                                                     | Cholinergic              |
| 16040_157102900  | <i>CHRNA7</i>                     | dn (1.8 Mb del)              |                                                                     | Cholinergic              |
| 14393_5020       | <i>CAMK2G**</i> ; <i>PPP3CB**</i> | dn (477 kb del)              |                                                                     | Cholinergic; Glutamergic |
| 13204_883        | <i>GNG13</i>                      | unk <sup>§</sup> (81 kb del) | Signalling (downstream neurotransmitter receptors and ion channels) | Both                     |
|                  | <i>GNG2***</i>                    | mat (101 kb del)             |                                                                     | Both                     |
| 2204_1           | <i>MAPK3***</i>                   | dn (680 kb del)              |                                                                     | Both                     |
| 20057_1290002    | <i>GNG2</i>                       | pat (102 kb del)             |                                                                     | Both                     |
| 20089_1391001    | <i>MAPK3</i>                      | dn (680 kb del)              |                                                                     | Both                     |
| 20127_4014001    | <i>MAPK3</i>                      | pat (680 kb del)             |                                                                     | Both                     |
| 5359_4           | <i>MAPK3</i>                      | dn (680 kb del)              |                                                                     | Both                     |
| 5068_3           | <i>MAPK3</i>                      | dn (680 kb del)              |                                                                     | Both                     |
| 5451_3           | <i>PRKACB</i>                     | dn (80 kb del)               |                                                                     | Both                     |
| 5046_3           | <i>PLCB1</i>                      | dn (30 kb del)               |                                                                     | Both                     |
| 5237_3           | <i>SHANK2*</i>                    | dn del                       | Scaffolds (synaptic organizers)                                     | Glutamergic              |
| 6319_3           | <i>SHANK2*</i>                    | dn del                       |                                                                     | Glutamergic              |
| 6325_3           | <i>SHANK2*</i>                    | dn del                       |                                                                     | Glutamergic              |
| 16079_1571066001 | <i>SHANK3*</i>                    | dn del                       |                                                                     | Glutamergic              |
| 2072_1           | <i>SHANK3*</i>                    | dn del                       |                                                                     | Glutamergic              |
| 6130_4           | <i>SHANK3*</i>                    | dn del                       |                                                                     | Glutamergic              |
| 5340_3           | <i>SHANK1</i>                     | mat del                      |                                                                     | Glutamergic              |

\* Same gene in two or more samples (recurrent gene); \*\* two genes within the same deletion/same sample (multigene); \*\*\* two genes in two different events in same sample (double-CNV-hit).

§ Both parental samples failed array QC.

del, deletion; dn, *de novo*; mat; maternal; pat, paternal; unk, inheritance unknown.

## Tables S14A-S14E. Characterization of genes selected by NETBAG

mmc4.xlsx (Excel workbook)

## Table S15. Functional-group enrichment for DAPPLE results

mmc5.xlsx (Excel workbook)

## Table S16. List of 97 high-confidence CNV/SNV genes

| Gene symbol     | Type    | Gene symbol     | Type                | Gene symbol     | Type                | Gene symbol     | Type    |
|-----------------|---------|-----------------|---------------------|-----------------|---------------------|-----------------|---------|
| <i>ABCA1</i>    | CNV     | <i>DTNA*</i>    | CNV                 | <i>MDM2</i>     | LoF-SNV             | <i>SKI</i>      | CNV     |
| <i>ABL1</i>     | CNV     | <i>DRP2</i>     | LoF XL-SNV in males | <i>MED13L</i>   | LoF-SNV             | <i>SMARCC2</i>  | LoF-SNV |
| <i>ANK2</i>     | LoF-SNV | <i>DST</i>      | LoF-SNV             | <i>NCKAP1</i>   | LoF-SNV             | <i>SMC2</i>     | CNV     |
| <i>ARHGAP32</i> | CNV     | <i>EPHB2</i>    | LoF-SNV             | <i>NFIA</i>     | LoF-SNV             | <i>SNRPN</i>    | CNV     |
| <i>ARHGDI1A</i> | CNV     | <i>ERCC6</i>    | CNV                 | <i>NRXN3</i>    | CNV                 | <i>SNX9</i>     | CNV     |
| <i>ATOH1</i>    | CNV     | <i>ESR2</i>     | CNV                 | <i>PARD3</i>    | CNV                 | <i>SOD2</i>     | CNV     |
| <i>ATP1B1</i>   | LoF-SNV | <i>ETS1</i>     | CNV                 | <i>PARK2</i>    | CNV                 | <i>SPAST</i>    | LoF-SNV |
| <i>BAZ1B</i>    | CNV     | <i>FLNA</i>     | CNV                 | <i>PAX5</i>     | LoF-SNV             | <i>SPATA13</i>  | LoF-SNV |
| <i>BCL11A</i>   | LoF-SNV | <i>GARNL1</i>   | CNV                 | <i>PIK3CB*</i>  | CNV                 | <i>SREBF1</i>   | CNV     |
| <i>BRWD1</i>    | LoF-SNV | <i>HAUS7</i>    | LoF XL-SNV in males | <i>PIR</i>      | LoF XL-SNV in males | <i>STAU2</i>    | CNV     |
| <i>CACNA1B</i>  | CNV     | <i>IKBKG</i>    | CNV                 | <i>PLCB1</i>    | CNV                 | <i>SVIL</i>     | LoF-SNV |
| <i>CAMK2G</i>   | CNV     | <i>IQGAP2</i>   | LoF-SNV             | <i>PPM1D</i>    | LoF-SNV             | <i>SYNCRIP*</i> | CNV     |
| <i>CBX4</i>     | LoF-SNV | <i>ITGA5</i>    | LoF-SNV             | <i>PPP3CB</i>   | CNV                 | <i>SYNJ2</i>    | CNV     |
| <i>CDK2</i>     | CNV     | <i>KAT2B</i>    | CNV                 | <i>PRKAB2</i>   | CNV                 | <i>TAOK2</i>    | CNV     |
| <i>CDK4</i>     | CNV     | <i>KIAA0232</i> | LoF-SNV             | <i>PSMB1</i>    | CNV                 | <i>TBC1D23</i>  | LoF-SNV |
| <i>CHD2*</i>    | CNV     | <i>KLF13</i>    | CNV                 | <i>PSMC2</i>    | CNV                 | <i>TBP</i>      | CNV     |
| <i>CNOT3</i>    | LoF-SNV | <i>LIMK1</i>    | CNV                 | <i>PTPRD</i>    | CNV                 | <i>TBR1</i>     | LoF-SNV |
| <i>CRKL</i>     | CNV     | <i>LRP2</i>     | LoF-SNV             | <i>RAB5A</i>    | CNV                 | <i>TCF3</i>     | LoF-SNV |
| <i>CSDE1</i>    | LoF-SNV | <i>MAPK11</i>   | CNV                 | <i>RAC3</i>     | CNV                 | <i>TNK2</i>     | CNV     |
| <i>CUBN</i>     | LoF-SNV | <i>MAPK12</i>   | CNV                 | <i>RAP1GDS1</i> | CNV                 | <i>VCP</i>      | LoF-SNV |
| <i>CUL2</i>     | CNV     | <i>MAPK3</i>    | CNV                 | <i>RER1</i>     | CNV                 | <i>ZMYND11</i>  | LoF-SNV |
| <i>CUL3</i>     | LoF-SNV | <i>MAPK7</i>    | CNV                 | <i>RIMS1</i>    | CNV, LoF-SNV        | <i>ZNF292</i>   | LoF-SNV |
| <i>CYFIP1</i>   | CNV     | <i>MAPK8</i>    | CNV                 | <i>RPS6KA3</i>  | LoF-SNV             |                 |         |
| <i>DLGAP2</i>   | CNV     | <i>MAX</i>      | CNV                 | <i>SETD2</i>    | LoF-SNV             |                 |         |
| <i>DLL1</i>     | LoF-SNV | <i>MCF2</i>     | LoF XL-SNV in males | <i>SH3GL3</i>   | CNV                 |                 |         |

This table lists 97 CNV or SNV genes present in the DAPPLE network, but not yet implicated in ASD or ID (i.e. not yet in Tables S6A-S6D), considered high-confidence ASD candidate genes. \*Genes in section 'Highlighted genes'.

## Table S17A. Listing of CNV calls in affected subjects

mmc6.xlsx (Excel workbook)

## Table S17B. Chromosome abnormalities in parents and control subjects

mmc7.xlsx (Excel workbook)

Chromosome abnormalities in probands are listed in **Table S1C**.

## Table S17C. Experimentally validated CNVs

mmc8.xlsx (Excel workbook)

The 456 validated CNVs in **Table S17C** comprise all CNVs validated experimentally across the 2446 ASD cases, including 315 CNVs confirmed in stage 1 samples and 141 CNVs confirmed in stage 2 samples.

## SUPPLEMENTAL DATAFILES

Listing of separate Excel workbooks.

### **Table S8. Phenotypes in ASD subjects with pathogenic CNVs or with selected CNVs of uncertain significance**

mmc2.xlsx

### **Tables S12A-S12D. GO terms, pathways, and MPO enrichment in affecteds versus control subjects**

mmc3.xlsx

### **Tables S14A-S14E. Characterization of genes selected by NETBAG**

mmc4.xlsx

### **Table S15. Functional-group enrichment for DAPPLE results**

mmc5.xlsx

### **Table S17A. Listing of CNV calls in affected subjects**

mmc6.xlsx

### **Table S17B. Chromosome abnormalities in parents and control subjects**

mmc7.xlsx

### **Table S17C. Experimentally validated CNVs**

mmc8.xlsx

## SUPPLEMENTAL ACKNOWLEDGEMENTS

Additional support for individual groups of the Autism Genome Project was provided by the US National Institutes of Health (NIH grants: HD34565, HD055751, HD055782, MH06359, MH52708, MH057881, MH061009, MH082121, MH089924, MH094293, MH094382, MH094400, NS043540, NS049261), Assistance Publique-Hôpitaux de Paris (France), Autism Speaks Canada, Autistica, Canada Foundation for Innovation, Canadian Institutes for Advanced Research, The Centre for Applied Genomics (Canada), The Center for Applied Genomics–Children's Hospital of Philadelphia (USA); Deutsche Forschungsgemeinschaft (Germany), Fondation de France, Fondation FondaMental (France), Fondation pour la Recherche Médicale (France), Foundation for Autism Research (USA), Fundação Calouste Gulbenkian (Portugal), Fundação para Ciência e Tecnologia (SFRH/BPD/74739/2010, SFRH/BPD/64281/2009, SFRH/BD/79081/2011, Portugal), the Gulbenkian Programme for Advanced Medical Education and the Portuguese Foundation for Science and Technology (SFRH/BDINT/51549/2011, Portugal), the Hospital for Sick Children Foundation (Canada), INSERM (France), The Margaret Q. Landenberger Foundation (USA), The Medical Charities Research Group (Ireland), The Mindich Child Health and Development Institute (USA), Nancy Lurie Marks Family Foundation (USA); The National Children's Research Centre (Ireland), National Institute of Health Research (UK), NeuroDevNet (Canada), the Ontario government and Ontario Brain Institute (Canada), Our Lady's Children's Hospital, Dublin (Ireland), the Pennsylvania Department of Health (4100047863), the Seaver Foundation (USA), the University of Toronto McLaughlin Centre (Canada), and the Wellcome Trust (core award 090532/Z/09/Z, UK).

Acknowledgement NIH grant No. U24 CA074783 to S. Gallinger: This work was made possible through collaboration and cooperative agreements with the Colon Cancer Family Registry and P.I.s.

This study makes use of data generated by the DECIPHER Consortium. A full list of centres who contributed to the generation of the data is available from <http://decipher.sanger.ac.uk> and via email from [decipher@sanger.ac.uk](mailto:decipher@sanger.ac.uk). Funding for the project was provided by the Wellcome Trust.

Lead AGP investigators: D. Pinto, E. M. Wijsman, V. J. Vieland, A. M. Vicente, G. D. Schellenberg, M. Pericak-Vance, A. D. Paterson, J. R. Parr, G. Oliveira, J. I. Nurnberger, A. P. Monaco, E. Maestrini, S. M. Klauck, H. Hakonarson, J. L. Haines, D. H. Geschwind, C. M. Freitag, S. E. Folstein, S. Ennis, H. Coon, A. Battaglia, P. Szatmari, J. S. Sutcliffe, J. Hallmayer, M. Gill, E. H. Cook, J. D. Buxbaum, B. Devlin, L. Gallagher, C. Betancur, and S. W. Scherer.

## SUPPLEMENTAL REFERENCES

1. Gilman, S.R., Iossifov, I., Levy, D., Ronemus, M., Wigler, M., and Vitkup, D. (2011). Rare de novo variants associated with autism implicate a large functional network of genes involved in formation and function of synapses. *Neuron* 70, 898-907.
2. Carbon, S., Ireland, A., Mungall, C.J., Shu, S., Marshall, B., and Lewis, S. (2009). AmiGO: online access to ontology and annotation data. *Bioinformatics* 25, 288-289.
3. Kanehisa, M., Goto, S., Sato, Y., Furumichi, M., and Tanabe, M. (2012). KEGG for integration and interpretation of large-scale molecular data sets. *Nucleic Acids Res* 40, D109-114.
4. Iossifov, I., Ronemus, M., Levy, D., Wang, Z., Hakker, I., Rosenbaum, J., Yamrom, B., Lee, Y.H., Narzisi, G., Leotta, A., et al. (2012). De novo gene disruptions in children on the autistic spectrum. *Neuron* 74, 285-299.
5. Neale, B.M., Kou, Y., Liu, L., Ma'ayan, A., Samocha, K.E., Sabo, A., Lin, C.F., Stevens, C., Wang, L.S., Makarov, V., et al. (2012). Patterns and rates of exonic de novo mutations in autism spectrum disorders. *Nature* 485, 242-245.
6. O'Roak, B.J., Vives, L., Girirajan, S., Karakoc, E., Krumm, N., Coe, B.P., Levy, R., Ko, A., Lee, C., Smith, J.D., et al. (2012). Sporadic autism exomes reveal a highly interconnected protein network of de novo mutations. *Nature* 485, 246-250.
7. Sanders, S.J., Murtha, M.T., Gupta, A.R., Murdoch, J.D., Raubeson, M.J., Willsey, A.J., Ercan-Sencicek, A.G., DiLullo, N.M., Parikshak, N.N., Stein, J.L., et al. (2012). De novo mutations revealed by whole-exome sequencing are strongly associated with autism. *Nature* 485, 237-241.
8. Kielinen, M., Rantala, H., Timonen, E., Linna, S.L., and Moilanen, I. (2004). Associated medical disorders and disabilities in children with autistic disorder: a population-based study. *Autism* 8, 49-60.
9. Darnell, J.C., Van Driesche, S.J., Zhang, C., Hung, K.Y., Mele, A., Fraser, C.E., Stone, E.F., Chen, C., Fak, J.J., Chi, S.W., et al. (2011). FMRP stalls ribosomal translocation on mRNAs linked to synaptic function and autism. *Cell* 146, 247-261.
10. Ascano, M., Jr., Mukherjee, N., Bandaru, P., Miller, J.B., Nusbaum, J.D., Corcoran, D.L., Langlois, C., Munschauer, M., Dewell, S., Hafner, M., et al. (2012). FMRP targets distinct mRNA sequence elements to regulate protein expression. *Nature* 492, 382-386.
11. Bayes, A., van de Lagemaat, L.N., Collins, M.O., Croning, M.D., Whittle, I.R., Choudhary, J.S., and Grant, S.G. (2011). Characterization of the proteome, diseases and evolution of the human postsynaptic density. *Nat Neurosci* 14, 19-21.
12. Huang, N., Lee, I., Marcotte, E.M., and Hurler, M.E. (2010). Characterising and predicting haploinsufficiency in the human genome. *PLoS Genet* 6, e1001154.
13. Robinson, P.N., Kohler, S., Bauer, S., Seelow, D., Horn, D., and Mundlos, S. (2008). The Human Phenotype Ontology: a tool for annotating and analyzing human hereditary disease. *Am J Hum Genet* 83, 610-615.
14. Eppig, J.T., Blake, J.A., Bult, C.J., Kadin, J.A., and Richardson, J.E. (2012). The Mouse Genome Database (MGD): comprehensive resource for genetics and genomics of the laboratory mouse. *Nucleic Acids Res* 40, D881-886.
15. BrainSpan. (2012). Atlas of the Developing Human Brain, Technical white paper; Section: Measuring Expression. In. (
16. Kang, H.J., Kawasawa, Y.I., Cheng, F., Zhu, Y., Xu, X., Li, M., Sousa, A.M., Pletikos, M., Meyer, K.A., Sedmak, G., et al. (2011). Spatio-temporal transcriptome of the human brain. *Nature* 478, 483-489.
17. Mortazavi, A., Williams, B.A., McCue, K., Schaeffer, L., and Wold, B. (2008). Mapping and quantifying mammalian transcriptomes by RNA-Seq. *Nat Methods* 5, 621-628.
18. Xu, B., Ionita-Laza, I., Roos, J.L., Boone, B., Woodruff, S., Sun, Y., Levy, S., Gogos, J.A., and Karayiorgou, M. (2012). De novo gene mutations highlight patterns of genetic and neural complexity in schizophrenia. *Nat Genet* 44, 1365-1369.
19. Rossin, E.J., Lage, K., Raychaudhuri, S., Xavier, R.J., Tatar, D., Benita, Y., Cotsapas, C., and Daly, M.J. (2011). Proteins encoded in genomic regions associated with immune-mediated disease physically interact and suggest underlying biology. *PLoS Genet* 7, e1001273.
20. Lage, K., Karlberg, E.O., Stirling, Z.M., Olason, P.I., Pedersen, A.G., Rigina, O., Hinsby, A.M., Tumer, Z., Pociot, F., Tommerup, N., et al. (2007). A human phenome-interactome network of protein complexes implicated in genetic disorders. *Nat Biotechnol* 25, 309-316.
21. Betancur, C. (2011). Etiological heterogeneity in autism spectrum disorders: more than 100 genetic and genomic disorders and still counting. *Brain Res* 1380, 42-77.

22. Lim, E.T., Raychaudhuri, S., Sanders, S.J., Stevens, C., Sabo, A., MacArthur, D.G., Neale, B.M., Kirby, A., Ruderfer, D.M., Fromer, M., et al. (2013). Rare complete knockouts in humans: population distribution and significant role in autism spectrum disorders. *Neuron* 77, 235-242.
23. Meyer, L.R., Zweig, A.S., Hinrichs, A.S., Karolchik, D., Kuhn, R.M., Wong, M., Sloan, C.A., Rosenbloom, K.R., Roe, G., Rhead, B., et al. (2013). The UCSC Genome Browser database: extensions and updates 2013. *Nucleic Acids Res* 41, D64-69.
24. Khurana, E., Fu, Y., Chen, J., and Gerstein, M. (2013). Interpretation of genomic variants using a unified biological network approach. *PLoS Comput Biol* 9, e1002886.
25. Li, M.M., Nimmakayalu, M.A., Mercer, D., Andersson, H.C., and Emanuel, B.S. (2008). Characterization of a cryptic 3.3 Mb deletion in a patient with a "balanced t(15;22) translocation" using high density oligo array CGH and gene expression arrays. *Am J Med Genet A* 146, 368-375.
26. Veredice, C., Bianco, F., Contaldo, I., Orteschi, D., Stefanini, M.C., Battaglia, D., Lettori, D., Guzzetta, F., and Zollino, M. (2009). Early onset myoclonic epilepsy and 15q26 microdeletion: observation of the first case. *Epilepsia* 50, 1810-1815.
27. Dhamija, R., Brenningstall, G., Wong-Kisiel, L., Dolan, M., Hirsch, B., and Wirrell, E. (2011). Microdeletion of chromosome 15q26.1 in a child with intractable generalized epilepsy. *Pediatr Neurol* 45, 60-62.
28. Capelli, L.P., Krepischi, A.C., Gurgel-Giannetti, J., Mendes, M.F., Rodrigues, T., Varela, M.C., Koiffmann, C.P., and Rosenberg, C. (2012). Deletion of the RMGA and CHD2 genes in a child with epilepsy and mental deficiency. *Eur J Med Genet* 55, 132-134.
29. Firth, H.V., Richards, S.M., Bevan, A.P., Clayton, S., Corpas, M., Rajan, D., Van Vooren, S., Moreau, Y., Pettett, R.M., and Carter, N.P. (2009). DECIPHER: Database of Chromosomal Imbalance and Phenotype in Humans Using Ensembl Resources. *Am J Hum Genet* 84, 524-533.
30. Kaminsky, E.B., Kaul, V., Paschall, J., Church, D.M., Bunke, B., Kunig, D., Moreno-De-Luca, D., Moreno-De-Luca, A., Mülle, J.G., Warren, S.T., et al. (2011). An evidence-based approach to establish the functional and clinical significance of copy number variants in intellectual and developmental disabilities. *Genet Med* 13, 777-784.
31. Feenstra, I., Fang, J., Koolen, D.A., Siezen, A., Evans, C., Winter, R.M., Lees, M.M., Riegel, M., de Vries, B.B., Van Ravenswaaij, C.M., et al. (2006). European Cytogeneticists Association Register of Unbalanced Chromosome Aberrations (ECARUCA); an online database for rare chromosome abnormalities. *Eur J Med Genet* 49, 279-291.
32. Korn, J.M., Kuruvilla, F.G., McCarroll, S.A., Wysoker, A., Nemes, J., Cawley, S., Hubbell, E., Veitch, J., Collins, P.J., Darvishi, K., et al. (2008). Integrated genotype calling and association analysis of SNPs, common copy number polymorphisms and rare CNVs. *Nat Genet* 40, 1253-1260.
33. Carvill, G.L., Heavin, S.B., Yendle, S.C., McMahon, J.M., O'Roak, B.J., Cook, J., Khan, A., Dorschner, M.O., Weaver, M., Calvert, S., et al. (2013). Targeted resequencing in epileptic encephalopathies identifies de novo mutations in CHD2 and SYNGAP1. *Nat Genet* 45, 825-830.
34. Adzhubei, I.A., Schmidt, S., Peshkin, L., Ramensky, V.E., Gerasimova, A., Bork, P., Kondrashov, A.S., and Sunyaev, S.R. (2010). A method and server for predicting damaging missense mutations. *Nat Methods* 7, 248-249.
35. Thomas, P.D., Campbell, M.J., Kejariwal, A., Mi, H., Karlak, B., Daverman, R., Diemer, K., Muruganujan, A., and Narechania, A. (2003). PANTHER: a library of protein families and subfamilies indexed by function. *Genome Res* 13, 2129-2141.
36. Ng, P.C., and Henikoff, S. (2003). SIFT: Predicting amino acid changes that affect protein function. *Nucleic Acids Res* 31, 3812-3814.
37. Bromberg, Y., and Rost, B. (2007). SNAP: predict effect of non-synonymous polymorphisms on function. *Nucleic Acids Res* 35, 3823-3835.
38. Schwarz, J.M., Rodelsperger, C., Schuelke, M., and Seelow, D. (2010). MutationTaster evaluates disease-causing potential of sequence alterations. *Nat Methods* 7, 575-576.
39. Cooper, G.M., Stone, E.A., Asimenos, G., Green, E.D., Batzoglou, S., and Sidow, A. (2005). Distribution and intensity of constraint in mammalian genomic sequence. *Genome Res* 15, 901-913.
40. Ashkenazy, H., Erez, E., Martz, E., Pupko, T., and Ben-Tal, N. (2010). ConSurf 2010: calculating evolutionary conservation in sequence and structure of proteins and nucleic acids. *Nucleic Acids Res* 38, W529-533.
41. Rauch, A., Wieczorek, D., Graf, E., Wieland, T., Ende, S., Schwarzmayr, T., Albrecht, B., Bartholdi, D., Beygo, J., Di Donato, N., et al. (2012). Range of genetic mutations associated with severe non-syndromic sporadic intellectual disability: an exome sequencing study. *Lancet* 380, 1674-1682.
42. Kulkarni, S., Nagarajan, P., Wall, J., Donovan, D.J., Donnell, R.L., Ligon, A.H., Venkatachalam, S., and Quade, B.J. (2008). Disruption of chromodomain helicase DNA binding protein 2 (CHD2) causes scoliosis. *Am J Med Genet A* 146A, 1117-1127.
43. Marfella, C.G., Henninger, N., LeBlanc, S.E., Krishnan, N., Garlick, D.S., Holzman, L.B., and Imbalzano, A.N. (2008). A mutation in the mouse Chd2 chromatin remodeling enzyme results in a complex renal phenotype. *Kidney Blood Press Res* 31, 421-432.
44. Vissers, L.E., van Ravenswaaij, C.M., Admiraal, R., Hurst, J.A., de Vries, B.B., Janssen, I.M., van der Vliet, W.A., Huys, E.H., de Jong, P.J., Hamel, B.C., et al. (2004). Mutations in a new member of the chromodomain gene family cause CHARGE syndrome. *Nat Genet* 36, 955-957.
45. Johansson, M., Rastam, M., Billstedt, E., Danielsson, S., Stromland, K., Miller, M., and Gillberg, C. (2006). Autism spectrum disorders and underlying brain pathology in CHARGE association. *Dev Med Child Neurol* 48, 40-50.
46. O'Roak, B.J., Vives, L., Fu, W., Egertson, J.D., Stanaway, I.B., Phelps, I.G., Carvill, G., Kumar, A., Lee, C., Ankenman, K., et al. (2012). Multiplex targeted sequencing identifies recurrently mutated genes in autism spectrum disorders. *Science* 338, 1619-1622.

47. Doherty, E.S., and Lacbawan, F. (2013). 2q37 microdeletion syndrome. GeneReviews, <http://www.ncbi.nlm.nih.gov/books/NBK1158/>.
48. Williams, S.R., Aldred, M.A., Der Kaloustian, V.M., Halal, F., Gowans, G., McLeod, D.R., Zondag, S., Toriello, H.V., Magenis, R.E., and Elsea, S.H. (2010). Haploinsufficiency of HDAC4 causes brachydactyly mental retardation syndrome, with brachydactyly type E, developmental delays, and behavioral problems. *Am J Hum Genet* 87, 219-228.
49. Villavicencio-Lorini, P., Klopocki, E., Trimborn, M., Koll, R., Mundlos, S., and Horn, D. (2012). Phenotypic variant of Brachydactyly-mental retardation syndrome in a family with an inherited interstitial 2q37.3 microdeletion including HDAC4. *Eur J Hum Genet* 21, 743-748.
50. Morris, B., Etoubleau, C., Bourthoumieu, S., Reynaud-Perrine, S., Laroche, C., Lebbar, A., Yardin, C., and Elsea, S.H. (2012). Dose dependent expression of HDAC4 causes variable expressivity in a novel inherited case of brachydactyly mental retardation syndrome. *Am J Med Genet A* 158A, 2015-2020.
51. Sando, R., 3rd, Gounko, N., Pieraut, S., Liao, L., Yates, J., 3rd, and Maximov, A. (2012). HDAC4 governs a transcriptional program essential for synaptic plasticity and memory. *Cell* 151, 821-834.
52. Kim, M.S., Akhtar, M.W., Adachi, M., Mahgoub, M., Bassel-Duby, R., Kavalali, E.T., Olson, E.N., and Monteggia, L.M. (2012). An essential role for histone deacetylase 4 in synaptic plasticity and memory formation. *J Neurosci* 32, 10879-10886.
53. Bienvenu, T., des Portes, V., Saint Martin, A., McDonnell, N., Billuart, P., Carrie, A., Vinet, M.C., Couvert, P., Toniolo, D., Ropers, H.H., et al. (1998). Non-specific X-linked semidominant mental retardation by mutations in a Rab GDP-dissociation inhibitor. *Hum Mol Genet* 7, 1311-1315.
54. D'Adamo, P., Menegon, A., Lo Nigro, C., Grasso, M., Gulisano, M., Tamanini, F., Bienvenu, T., Gedeon, A.K., Oostra, B., Wu, S.K., et al. (1998). Mutations in GDI1 are responsible for X-linked non-specific mental retardation. *Nat Genet* 19, 134-139.
55. Vandewalle, J., Van Esch, H., Govaerts, K., Verbeeck, J., Zweier, C., Madrigal, I., Mila, M., Pijkels, E., Fernandez, I., Kohlhasse, J., et al. (2009). Dosage-dependent severity of the phenotype in patients with mental retardation due to a recurrent copy-number gain at Xq28 mediated by an unusual recombination. *Am J Hum Genet* 85, 809-822.
56. Clayton-Smith, J., Walters, S., Hobson, E., Burkitt-Wright, E., Smith, R., Toutain, A., Amiel, J., Lyonnet, S., Mansour, S., Fitzpatrick, D., et al. (2009). Xq28 duplication presenting with intestinal and bladder dysfunction and a distinctive facial appearance. *Eur J Hum Genet* 17, 434-443.
57. Madrigal, I., Rodriguez-Revenga, L., Badenas, C., Sanchez, A., Martinez, F., Fernandez, I., Fernandez-Burriel, M., and Mila, M. (2007). MLPA as first screening method for the detection of microduplications and microdeletions in patients with X-linked mental retardation. *Genet Med* 9, 117-122.
58. Sakai, Y., Shaw, C.A., Dawson, B.C., Dugas, D.V., Al-Mohtaseb, Z., Hill, D.E., and Zoghbi, H.Y. (2011). Protein interactome reveals converging molecular pathways among autism disorders. *Sci Transl Med* 3, 86ra49.
59. Bianchi, V., Farisello, P., Baldelli, P., Meskenaite, V., Milanese, M., Vecellio, M., Muhlemann, S., Lipp, H.P., Bonanno, G., Benfenati, F., et al. (2009). Cognitive impairment in Gdi1-deficient mice is associated with altered synaptic vesicle pools and short-term synaptic plasticity, and can be corrected by appropriate learning training. *Hum Mol Genet* 18, 105-117.
60. Shuib, S., McMullan, D., Rattenberry, E., Barber, R.M., Rahman, F., Zatyka, M., Chapman, C., Macdonald, F., Latif, F., Davison, V., et al. (2009). Microarray based analysis of 3p25-p26 deletions (3p- syndrome). *Am J Med Genet A* 149A, 2099-2105.
61. Gunnarsson, C., and Foyn Bruun, C. (2010). Molecular characterization and clinical features of a patient with an interstitial deletion of 3p25.3-p26.1. *Am J Med Genet A* 152A, 3110-3114.
62. Riess, A., Grasshoff, U., Schaferhoff, K., Bonin, M., Riess, O., Horber, V., and Tzschach, A. (2012). Interstitial 3p25.3-p26.1 deletion in a patient with intellectual disability. *Am J Med Genet A* 158A, 2587-2590.
63. Peltekova, I.T., Macdonald, A., and Armour, C.M. (2012). Microdeletion on 3p25 in a patient with features of 3p deletion syndrome. *Am J Med Genet A* 158A, 2583-2586.
64. Kellogg, G., Sum, J., and Wallerstein, R. (2013). Deletion of 3p25.3 in a patient with intellectual disability and dysmorphic features with further definition of a critical region. *Am J Med Genet A* 161, 1405-1408.
65. Ellery, P.M., Ellis, R.J., and Holder, S.E. (2014). Interstitial 3p25 deletion in a patient with features of 3p deletion syndrome: further evidence for the role of SRGAP3 in mental retardation. *Clin Dysmorphol* 23, 29-31.
66. Shaikh, T.H., Gai, X., Perin, J.C., Glessner, J.T., Xie, H., Murphy, K., O'Hara, R., Casalunovo, T., Conlin, L.K., D'Arcy, M., et al. (2009). High-resolution mapping and analysis of copy number variations in the human genome: a data resource for clinical and research applications. *Genome Res* 19, 1682-1690.
67. Schaefer, G.B., and Lutz, R.E. (2006). Diagnostic yield in the clinical genetic evaluation of autism spectrum disorders. *Genet Med* 8, 549-556.
68. Ververi, A., Vargiami, E., Papadopoulou, V., Tryfonas, D., and Zafeiriou, D.I. (2012). Clinical and laboratory data in a sample of Greek children with autism spectrum disorders. *J Autism Dev Disord* 42, 1470-1476.
69. Kleefstra, T., van Zelst-Stams, W.A., Nillesen, W.M., Cormier-Daire, V., Houge, G., Foulds, N., van Dooren, M., Willemsen, M.H., Pfundt, R., Turner, A., et al. (2009). Further clinical and molecular delineation of the 9q subtelomeric deletion syndrome supports a major contribution of EHMT1 haploinsufficiency to the core phenotype. *J Med Genet* 46, 598-606.
70. Rodriguez-Santiago, B., Malats, N., Rothman, N., Armengol, L., Garcia-Closas, M., Kogevinas, M., Villa, O., Hutchinson, A., Earl, J., Marenne, G., et al. (2010). Mosaic uniparental disomies and aneuploidies as large structural variants of the human genome. *Am J Hum Genet* 87, 129-138.

71. Molin, A.M., Andrieux, J., Koolen, D.A., Malan, V., Carella, M., Colleaux, L., Cormier-Daire, V., David, A., de Leeuw, N., Delobel, B., et al. (2012). A novel microdeletion syndrome at 3q13.31 characterised by developmental delay, postnatal overgrowth, hypoplastic male genitals, and characteristic facial features. *J Med Genet* *49*, 104-109.
72. Gimelli, S., Leoni, M., Di Rocco, M., Caridi, G., Porta, S., Cuoco, C., Gimelli, G., and Tassano, E. (2013). A rare 3q13.31 microdeletion including GAP43 and LSAMP genes. *Mol Cytogenet* *6*, 52.
73. Gil, O.D., Zhang, L., Chen, S., Ren, Y.Q., Pimenta, A., Zanazzi, G., Hillman, D., Levitt, P., and Salzer, J.L. (2002). Complementary expression and heterophilic interactions between IgLON family members neurotrimin and LAMP. *J Neurobiol* *51*, 190-204.
74. Catania, E.H., Pimenta, A., and Levitt, P. (2008). Genetic deletion of Lsamp causes exaggerated behavioral activation in novel environments. *Behav Brain Res* *188*, 380-390.
75. Qiu, S., Champagne, D.L., Peters, M., Catania, E.H., Weeber, E.J., Levitt, P., and Pimenta, A.F. (2010). Loss of limbic system-associated membrane protein leads to reduced hippocampal mineralocorticoid receptor expression, impaired synaptic plasticity, and spatial memory deficit. *Biol Psychiatry* *68*, 197-204.
76. Gijbbers, A.C., den Hollander, N.S., Helderma-van de Enden, A.T., Schuur-Hoeijmakers, J.H., Vijfhuizen, L., Bijlsma, E.K., van Haeringen, A., Hansson, K.B., Bakker, E., Breuning, M.H., et al. (2011). X-chromosome duplications in males with mental retardation: pathogenic or benign variants? *Clin Genet* *79*, 71-78.
77. Shimokawa, N., Haglund, K., Holter, S.M., Grabbe, C., Kirkin, V., Koibuchi, N., Schultz, C., Rozman, J., Hoeller, D., Qiu, C.H., et al. (2010). CIN85 regulates dopamine receptor endocytosis and governs behaviour in mice. *Embo J* *29*, 2421-2432.
78. Kowanetz, K., Husnjak, K., Holler, D., Kowanetz, M., Soubeyran, P., Hirsch, D., Schmidt, M.H., Pavelic, K., De Camilli, P., Randazzo, P.A., et al. (2004). CIN85 associates with multiple effectors controlling intracellular trafficking of epidermal growth factor receptors. *Mol Biol Cell* *15*, 3155-3166.
79. Kawata, A., Iida, J., Ikeda, M., Sato, Y., Mori, H., Kansaku, A., Sumita, K., Fujiwara, N., Rokukawa, C., Hamano, M., et al. (2006). CIN85 is localized at synapses and forms a complex with S-SCAM via dendrin. *J Biochem* *139*, 931-939.
80. Gudjonsson, T., Altmeyer, M., Savic, V., Toledo, L., Dinant, C., Grofte, M., Bartkova, J., Poulsen, M., Oka, Y., Bekker-Jensen, S., et al. (2012). TRIP12 and UBR5 suppress spreading of chromatin ubiquitylation at damaged chromosomes. *Cell* *150*, 697-709.
81. Poulsen, E.G., Steinhauer, C., Lees, M., Lauridsen, A.M., Ellgaard, L., and Hartmann-Petersen, R. (2012). HUWE1 and TRIP12 collaborate in degradation of ubiquitin-fusion proteins and misframed ubiquitin. *PLoS One* *7*, e50548.
82. Bannai, H., Fukatsu, K., Mizutani, A., Natsume, T., Iemura, S., Ikegami, T., Inoue, T., and Mikoshiba, K. (2004). An RNA-interacting protein, SYNCRIP (heterogeneous nuclear ribonuclear protein Q1/NSAP1) is a component of mRNA granule transported with inositol 1,4,5-trisphosphate receptor type 1 mRNA in neuronal dendrites. *J Biol Chem* *279*, 53427-53434.
83. Pak, C., Garshasbi, M., Kahrizi, K., Gross, C., Apponi, L.H., Noto, J.J., Kelly, S.M., Leung, S.W., Tzschach, A., Behjati, F., et al. (2011). Mutation of the conserved polyadenosine RNA binding protein, ZC3H14/dNab2, impairs neural function in Drosophila and humans. *Proc Natl Acad Sci U S A* *108*, 12390-12395.
84. Piton, A., Michaud, J.L., Peng, H., Aradhya, S., Gauthier, J., Mottron, L., Champagne, N., Lafreniere, R.G., Hamdan, F.F., Joobers, R., et al. (2008). Mutations in the calcium-related gene IL1RAPL1 are associated with autism. *Hum Mol Genet* *17*, 3965-3974.
85. Wang, P., Carrion, P., Qiao, Y., Tyson, C., Hrynychak, M., Calli, K., Lopez-Rangel, E., Andrieux, J., Delobel, B., Duban-Bedu, B., et al. (2013). Genotype-phenotype analysis of 18q12.1-q12.2 copy number variation in autism. *Eur J Med Genet* (*Epub ahead of print*).
86. Ichida, F., Tsubata, S., Bowles, K.R., Haneda, N., Uese, K., Miyawaki, T., Dreyer, W.J., Messina, J., Li, H., Bowles, N.E., et al. (2001). Novel gene mutations in patients with left ventricular noncompaction or Barth syndrome. *Circulation* *103*, 1256-1263.
87. Hinton, V.J., Cyrulnik, S.E., Fee, R.J., Batchelder, A., Kiefel, J.M., Goldstein, E.M., Kaufmann, P., and De Vivo, D.C. (2009). Association of autistic spectrum disorders with dystrophinopathies. *Pediatr Neurol* *41*, 339-346.
88. Young, H.K., Barton, B.A., Waisbren, S., Portales Dale, L., Ryan, M.M., Webster, R.I., and North, K.N. (2008). Cognitive and psychological profile of males with Becker muscular dystrophy. *J Child Neurol* *23*, 155-162.
89. Pilgram, G.S., Potikanond, S., Baines, R.A., Fradkin, L.G., and Noordermeer, J.N. (2010). The roles of the dystrophin-associated glycoprotein complex at the synapse. *Mol Neurobiol* *41*, 1-21.
90. Grady, R.M., Grange, R.W., Lau, K.S., Maimone, M.M., Nichol, M.C., Stull, J.T., and Sanes, J.R. (1999). Role for alpha-dystrobrevin in the pathogenesis of dystrophin-dependent muscular dystrophies. *Nat Cell Biol* *1*, 215-220.
91. Grady, R.M., Wozniak, D.F., Ohlemiller, K.K., and Sanes, J.R. (2006). Cerebellar synaptic defects and abnormal motor behavior in mice lacking alpha- and beta-dystrobrevin. *J Neurosci* *26*, 2841-2851.
92. Garbett, K., Ebert, P.J., Mitchell, A., Lintas, C., Manzi, B., Mirnics, K., and Persico, A.M. (2008). Immune transcriptome alterations in the temporal cortex of subjects with autism. *Neurobiol Dis* *30*, 303-311.
93. Iwamoto, K., Kakiuchi, C., Bundo, M., Ikeda, K., and Kato, T. (2004). Molecular characterization of bipolar disorder by comparing gene expression profiles of postmortem brains of major mental disorders. *Mol Psychiatry* *9*, 406-416.
94. Metzinger, L., Blake, D.J., Squier, M.V., Anderson, L.V., Deconinck, A.E., Nawrotzki, R., Hilton-Jones, D., and Davies, K.E. (1997). Dystrobrevin deficiency at the sarcolemma of patients with muscular dystrophy. *Hum Mol Genet* *6*, 1185-1191.
95. Brauer, A.U., Savaskan, N.E., Kuhn, H., Prehn, S., Ninnemann, O., and Nitsch, R. (2003). A new phospholipid phosphatase, PRG-1, is involved in axon growth and regenerative sprouting. *Nat Neurosci* *6*, 572-578.
96. Willemssen, M.H., Valles, A., Kirkels, L.A., Mastebroek, M., Olde Loohuis, N., Kos, A., Wissink-Lindhout, W.M., de Brouwer, A.P., Nillesen, W.M., Pfundt, R., et al. (2011). Chromosome 1p21.3 microdeletions comprising DPYD and MIR137 are associated with intellectual disability. *J Med Genet* *48*, 810-818.



97. Carter, M.T., Nikkel, S.M., Fernandez, B.A., Marshall, C.R., Noor, A., Lionel, A.C., Prasad, A., Pinto, D., Joseph-George, A.M., Noakes, C., et al. (2011). Hemizygous deletions on chromosome 1p21.3 involving the DPYD gene in individuals with autism spectrum disorder. *Clin Genet* *80*, 435-443.
98. Smrt, R.D., Szulwach, K.E., Pfeiffer, R.L., Li, X., Guo, W., Pathania, M., Teng, Z.Q., Luo, Y., Peng, J., Bordey, A., et al. (2010). MicroRNA miR-137 regulates neuronal maturation by targeting ubiquitin ligase mind bomb-1. *Stem Cells* *28*, 1060-1070.
99. Szulwach, K.E., Li, X., Smrt, R.D., Li, Y., Luo, Y., Lin, L., Santistevan, N.J., Li, W., Zhao, X., and Jin, P. (2010). Cross talk between microRNA and epigenetic regulation in adult neurogenesis. *J Cell Biol* *189*, 127-141.
100. Schizophrenia Psychiatric Genome-Wide Association Study (GWAS) Consortium. (2011). Genome-wide association study identifies five new schizophrenia loci. *Nat Genet* *43*, 969-976.
101. Cusco, I., Medrano, A., Gener, B., Vilardell, M., Gallastegui, F., Villa, O., Gonzalez, E., Rodriguez-Santiago, B., Vilella, E., Del Campo, M., et al. (2009). Autism-specific copy number variants further implicate the phosphatidylinositol signaling pathway and the glutamatergic synapse in the etiology of the disorder. *Hum Mol Genet* *18*, 1795-1804.
102. Gross, C., Nakamoto, M., Yao, X., Chan, C.B., Yim, S.Y., Ye, K., Warren, S.T., and Bassell, G.J. (2010). Excess phosphoinositide 3-kinase subunit synthesis and activity as a novel therapeutic target in fragile X syndrome. *J Neurosci* *30*, 10624-10638.
103. Sharma, A., Hoeffler, C.A., Takayasu, Y., Miyawaki, T., McBride, S.M., Klann, E., and Zukin, R.S. (2010). Dysregulation of mTOR signaling in fragile X syndrome. *J Neurosci* *30*, 694-702.
104. Lang, B., Alrahbeni, T.M., Clair, D.S., Blackwood, D.H., McCaig, C.D., and Shen, S. (2012). HDAC9 is implicated in schizophrenia and expressed specifically in post-mitotic neurons but not in adult neural stem cells. *Am J Stem Cells* *1*, 31-41.
105. Bachmann-Gagescu, R., Mefford, H.C., Cowan, C., Glew, G.M., Hing, A.V., Wallace, S., Bader, P.I., Hamati, A., Reitnauer, P.J., Smith, R., et al. (2010). Recurrent 200-kb deletions of 16p11.2 that include the SH2B1 gene are associated with developmental delay and obesity. *Genet Med* *12*, 641-647.
106. Barge-Schaapveld, D.Q., Maas, S.M., Polstra, A., Knegt, L.C., and Hennekam, R.C. (2011). The atypical 16p11.2 deletion: a not so atypical microdeletion syndrome? *Am J Med Genet A* *155A*, 1066-1072.
107. Bijlsma, E.K., Gijsbers, A.C., Schuurs-Hoeijmakers, J.H., van Haeringen, A., Fransen van de Putte, D.E., Anderlid, B.M., Lundin, J., Lapunzina, P., Perez Jurado, L.A., Delle Chiaie, B., et al. (2009). Extending the phenotype of recurrent rearrangements of 16p11.2: deletions in mentally retarded patients without autism and in normal individuals. *Eur J Med Genet* *52*, 77-87.
108. Bochukova, E.G., Huang, N., Keogh, J., Henning, E., Purmann, C., Blaszczyk, K., Saeed, S., Hamilton-Shield, J., Clayton-Smith, J., O'Rahilly, S., et al. (2010). Large, rare chromosomal deletions associated with severe early-onset obesity. *Nature* *463*, 666-670.
109. Sampson, M.G., Coughlin, C.R., 2nd, Kaplan, P., Conlin, L.K., Meyers, K.E., Zackai, E.H., Spinner, N.B., and Copelovitch, L. (2010). Evidence for a recurrent microdeletion at chromosome 16p11.2 associated with congenital anomalies of the kidney and urinary tract (CAKUT) and Hirschsprung disease. *Am J Med Genet A* *152A*, 2618-2622.
110. Tabet, A.C., Pilorge, M., Delorme, R., Amsellem, F., Pinard, J.M., Leboyer, M., Verloes, A., Benzacken, B., and Betancur, C. (2012). Autism multiplex family with 16p11.2p12.2 microduplication syndrome in monozygotic twins and distal 16p11.2 deletion in their brother. *Eur J Hum Genet* *20*, 540-546.
111. Moreno-De-Luca, D., Sanders, S.J., Willsey, A.J., Mulle, J.G., Lowe, J.K., Geschwind, D.H., State, M.W., Martin, C.L., and Ledbetter, D.H. (2013). Using large clinical data sets to infer pathogenicity for rare copy number variants in autism cohorts. *Mol Psychiatry* *18*, 1090-1095.
112. Guha, S., Rees, E., Darvasi, A., Ivanov, D., Ikeda, M., Bergen, S.E., Magnusson, P.K., Cormican, P., Morris, D., Gill, M., et al. (2013). Implication of a rare deletion at distal 16p11.2 in schizophrenia. *JAMA Psychiatry* *70*, 253-260.
113. Doche, M.E., Bochukova, E.G., Su, H.W., Pearce, L.R., Keogh, J.M., Henning, E., Cline, J.M., Saeed, S., Dale, A., Cheetham, T., et al. (2012). Human SH2B1 mutations are associated with maladaptive behaviors and obesity. *J Clin Invest* *122*, 4732-4736.
114. Zhang, Y., Zhu, W., Wang, Y.G., Liu, X.J., Jiao, L., Liu, X., Zhang, Z.H., Lu, C.L., and He, C. (2006). Interaction of SH2-Bbeta with RET is involved in signaling of GDNF-induced neurite outgrowth. *J Cell Sci* *119*, 1666-1676.
115. Maures, T.J., Chen, L., and Carter-Su, C. (2009). Nucleocytoplasmic shuttling of the adapter protein SH2B1beta (SH2-Bbeta) is required for nerve growth factor (NGF)-dependent neurite outgrowth and enhancement of expression of a subset of NGF-responsive genes. *Mol Endocrinol* *23*, 1077-1091.
116. Ren, D., Zhou, Y., Morris, D., Li, M., Li, Z., and Rui, L. (2007). Neuronal SH2B1 is essential for controlling energy and glucose homeostasis. *J Clin Invest* *117*, 397-406.
117. Pinto, D., Pagnamenta, A.T., Klei, L., Anney, R., Merico, D., Regan, R., Conroy, J., Magalhaes, T.R., Correia, C., Abrahams, B.S., et al. (2010). Functional impact of global rare copy number variation in autism spectrum disorders. *Nature* *466*, 368-372.
118. Colella, S., Yau, C., Taylor, J.M., Mirza, G., Butler, H., Clouston, P., Bassett, A.S., Seller, A., Holmes, C.C., and Ragoussis, J. (2007). QuantiSNP: an Objective Bayes Hidden-Markov Model to detect and accurately map copy number variation using SNP genotyping data. *Nucleic Acids Res* *35*, 2013-2025.
119. Pinto, D., Darvishi, K., Shi, X., Rajan, D., Rigler, D., Fitzgerald, T., Lionel, A.C., Thiruvahindrapuram, B., Macdonald, J.R., Mills, R., et al. (2011). Comprehensive assessment of array-based platforms and calling algorithms for detection of copy number variants. *Nat Biotechnol* *29*, 512-520.
120. Wang, K., Li, M., Hadley, D., Liu, R., Glessner, J., Grant, S.F., Hakonarson, H., and Bucan, M. (2007). PennCNV: an integrated hidden Markov model designed for high-resolution copy number variation detection in whole-genome SNP genotyping data. *Genome Res* *17*, 1665-1674.

121. Anney, R., Klei, L., Pinto, D., Regan, R., Conroy, J., Magalhaes, T.R., Correia, C., Abrahams, B.S., Sykes, N., Pagnamenta, A.T., et al. (2010). A genome-wide scan for common alleles affecting risk for autism. *Hum Mol Genet* *19*, 4072-4082.
122. Anney, R., Klei, L., Pinto, D., Almeida, J., Bacchelli, E., Baird, G., Bolshakova, N., Bolte, S., Bolton, P.F., Bourgeron, T., et al. (2012). Individual common variants exert weak effects on the risk for autism spectrum disorders. *Hum Mol Genet* *21*, 4781-4792.
123. Klei, L., Kent, B.P., Melhem, N.M., Devlin, B., and Roeder, K. (2011). GemTools: a fast and efficient approach to estimating genetic ancestry. *Statistics Applications* [http://arxiv.org/PS\\_cache/arxiv/pdf/1104/1104.1162v1.pdf](http://arxiv.org/PS_cache/arxiv/pdf/1104/1104.1162v1.pdf).
124. Bierut, L.J., Agrawal, A., Bucholz, K.K., Doheny, K.F., Laurie, C., Pugh, E., Fisher, S., Fox, L., Howells, W., Bertelsen, S., et al. (2010). A genome-wide association study of alcohol dependence. *Proc Natl Acad Sci U S A* *107*, 5082-5087.
125. Newcomb, P.A., Baron, J., Cotterchio, M., Gallinger, S., Grove, J., Haile, R., Hall, D., Hopper, J.L., Jass, J., Le Marchand, L., et al. (2007). Colon Cancer Family Registry: an international resource for studies of the genetic epidemiology of colon cancer. *Cancer Epidemiol Biomarkers Prev* *16*, 2331-2343.
126. Figueiredo, J.C., Lewinger, J.P., Song, C., Campbell, P.T., Conti, D.V., Edlund, C.K., Duggan, D.J., Rangrej, J., Lemire, M., Hudson, T., et al. (2011). Genotype-environment interactions in microsatellite stable/microsatellite instability-low colorectal cancer: results from a genome-wide association study. *Cancer Epidemiol Biomarkers Prev* *20*, 758-766.
127. Fox, C.S., Liu, Y., White, C.C., Feitosa, M., Smith, A.V., Heard-Costa, N., Lohman, K., Johnson, A.D., Foster, M.C., Greenawalt, D.M., et al. (2012). Genome-wide association for abdominal subcutaneous and visceral adipose reveals a novel locus for visceral fat in women. *PLoS Genet* *8*, e1002695.
128. Griswold, A.J., Ma, D., Cukier, H.N., Nations, L.D., Schmidt, M.A., Chung, R.H., Jaworski, J.M., Salyakina, D., Konidari, I., Whitehead, P.L., et al. (2012). Evaluation of copy number variations reveals novel candidate genes in autism spectrum disorder-associated pathways. *Hum Mol Genet* *21*, 3513-3523.
129. Leblond, C.S., Heinrich, J., Delorme, R., Proepper, C., Betancur, C., Huguette, G., Konyukh, M., Chaste, P., Ey, E., Rastam, M., et al. (2012). Genetic and functional analyses of SHANK2 mutations suggest a multiple hit model of autism spectrum disorders. *PLoS Genet* *8*, e1002521.
130. Moessner, R., Marshall, C.R., Sutcliffe, J.S., Skaug, J., Pinto, D., Vincent, J., Zwaigenbaum, L., Fernandez, B., Roberts, W., Szatmari, P., et al. (2007). Contribution of SHANK3 mutations to autism spectrum disorder. *Am J Hum Genet* *81*, 1289-1297.
131. Hehir-Kwa, J.Y., Rodriguez-Santiago, B., Vissers, L.E., de Leeuw, N., Pfundt, R., Buitelaar, J.K., Perez-Jurado, L.A., and Veltman, J.A. (2011). De novo copy number variants associated with intellectual disability have a paternal origin and age bias. *J Med Genet* *48*, 776-778.
132. Sanders, S.J., Ercan-Sencicek, A.G., Hus, V., Luo, R., Murtha, M.T., Moreno-De-Luca, D., Chu, S.H., Moreau, M.P., Gupta, A.R., Thomson, S.A., et al. (2011). Multiple recurrent de novo CNVs, including duplications of the 7q11.23 Williams syndrome region, are strongly associated with autism. *Neuron* *70*, 863-885.
133. Froyen, G., Belet, S., Martinez, F., Santos-Reboucas, C.B., Declercq, M., Verbeeck, J., Donckers, L., Berland, S., Mayo, S., Rosello, M., et al. (2012). Copy-number gains of HUWE1 due to replication- and recombination-based rearrangements. *Am J Hum Genet* *91*, 252-264.
134. Berkel, S., Marshall, C.R., Weiss, B., Howe, J., Roeth, R., Moog, U., Endris, V., Roberts, W., Szatmari, P., Pinto, D., et al. (2010). Mutations in the SHANK2 synaptic scaffolding gene in autism spectrum disorder and mental retardation. *Nat Genet* *42*, 489-491.
135. Sebat, J., Lakshmi, B., Malhotra, D., Troge, J., Lese-Martin, C., Walsh, T., Yamrom, B., Yoon, S., Krasnitz, A., Kendall, J., et al. (2007). Strong association of de novo copy number mutations with autism. *Science* *316*, 445-449.
136. Marshall, C.R., Noor, A., Vincent, J.B., Lionel, A.C., Feuk, L., Skaug, J., Shago, M., Moessner, R., Pinto, D., Ren, Y., et al. (2008). Structural variation of chromosomes in autism spectrum disorder. *Am J Hum Genet* *82*, 477-488.
137. Noor, A., Whibley, A., Marshall, C.R., Gianakopoulos, P.J., Piton, A., Carson, A.R., Orlic-Milacic, M., Lionel, A.C., Sato, D., Pinto, D., et al. (2010). Disruption at the PTCHD1 Locus on Xp22.11 in Autism spectrum disorder and intellectual disability. *Sci Transl Med* *2*, 49ra68.
138. Pagnamenta, A.T., Holt, R., Yusuf, M., Pinto, D., Wing, K., Betancur, C., Scherer, S.W., Volpi, E.V., and Monaco, A.P. (2011). A family with autism and rare copy number variants disrupting the Duchenne/Becker muscular dystrophy gene DMD and TRPM3. *J Neurodev Disord* *3*, 124-131.
139. Stankiewicz, P., Kulkarni, S., Dharmadhikari, A.V., Sampath, S., Bhatt, S.S., Shaikh, T.H., Xia, Z., Pursley, A.N., Cooper, M.L., Shinawi, M., et al. (2012). Recurrent deletions and reciprocal duplications of 10q11.21q11.23 including CHAT and SLC18A3 are likely mediated by complex low-copy repeats. *Hum Mutat* *33*, 165-179.
140. Luo, R., Sanders, S.J., Tian, Y., Voineagu, I., Huang, N., Chu, S.H., Klei, L., Cai, C., Ou, J., Lowe, J.K., et al. (2012). Genome-wide transcriptome profiling reveals the functional impact of rare de novo and recurrent CNVs in autism spectrum disorders. *Am J Hum Genet* *91*, 38-55.
